# Supplementary material for: Large-scale phenotypic drug screen identifies neuroprotectants in zebrafish and mouse models of retinitis pigmentosa
Source: eLife. 2021 Jun 29;10:e57245. doi: 10.7554/eLife.57245 (PMC8425951; doi:10.7554/eLife.57245)
Supplement: Figure 1—source data 1. [file elife-57245-fig1-data1.xlsx]

## Sheet: Exp1
	5dpf	6dpf						7dpf						8dpf						5dpf	6dpf						7dpf						8dpf
	0mM	0mM	0.625mM	1.25mM	2.5mM	5mM	10mM	0mM	0.625mM	1.25mM	2.5mM	5mM	10mM	0mM	0.625mM	1.25mM	2.5mM	5mM	10mM	0mM	0mM	0.625mM	1.25mM	2.5mM	5mM	10mM	0mM	0.625mM	1.25mM	2.5mM	5mM	10mM	0mM	0.625mM	1.25mM	2.5mM	5mM	10mM
	3249	32440	2737	4967	1754	1256	5610	3201	6539	817	211	791	587	10268	1329	2132	674	249	156	1.16313	5.20644	0.439273	0.797175	0.281507	0.201581	0.900373	0.650175	1.32818	0.165946	0.0428575	0.160665	0.119229	1.33235	0.172447	0.276642	0.0874563	0.0323095	0.0202421
	2341	2265	1227	1933	13092	2728	819	2858	7113	2522	653	1592	173	7979	2085	2926	2620	241	156	0.838067	0.36352	0.196927	0.310236	2.10119	0.437829	0.131445	0.580506	1.44477	0.512259	0.132635	0.323361	0.0351391	1.03533	0.270544	0.379669	0.339964	0.0312715	0.0202421
	5793	2796	17349	1381	2064	1670	2183	7471	5071	3567	320	447	428	9530	5500	2315	1348	258	1353	2.07387	0.448742	2.78442	0.221643	0.33126	0.268026	0.350359	1.51748	1.03	0.724515	0.0649972	0.0907929	0.0869337	1.23659	0.713664	0.300388	0.174913	0.0334773	0.175561
	831	1630	7434	6865	3955	1793	586	6104	434	784	1456	1553	182	20011	3031	700	1742	1866	379	0.297494	0.261606	1.19311	1.10179	0.634755	0.287766	0.0940497	1.23982	0.0881524	0.159243	0.295737	0.315439	0.0369671	2.59657	0.393294	0.09083	0.226037	0.242127	0.0491779
	1859	3469	2913	1246	1177	4713	1429	11188	1970	461	331	172	592	2179	8142	1404	634	153	293	0.665513	0.556755	0.46752	0.199976	0.188902	0.75641	0.229346	2.27246	0.400139	0.0936365	0.0672314	0.034936	0.120245	0.282741	1.05648	0.182179	0.082266	0.0198528	0.0380188
	3157	1605	4880	5745	1090	204	468	2272	1355	620	1517	735	313	5486	8859	611	638	1617	325	1.13019	0.257593	0.783212	0.92204	0.174939	0.0327408	0.0751113	0.46148	0.275222	0.125932	0.308127	0.14929	0.0635754	0.711847	1.14952	0.0792816	0.082785	0.209817	0.0421711
	1858	2651	8869	9888	2318	5400	267	4172	2939	2090	980	976	326	6818	1598	1894	952	338	174	0.665155	0.42547	1.42342	1.58697	0.372026	0.866669	0.042852	0.847401	0.596958	0.424513	0.199054	0.198241	0.0662159	0.884684	0.207352	0.24576	0.123529	0.0438579	0.0225777
	4399	2521	8982	1299	3890	1729	757	6802	5710	1644	436	617	591	908	14876	4737	1394	1180	910	1.57482	0.404606	1.44156	0.208482	0.624323	0.277495	0.121494	1.3816	1.15979	0.333923	0.0885586	0.125323	0.120042	0.117819	1.93027	0.614659	0.180881	0.153113	0.118079
	3802	5328	4247	5552	2918	561	1348	8246	2794	568	1118	775	317	5437	4384	1138	776	282	225	1.3611	0.855114	0.681619	0.891064	0.468322	0.0900373	0.216346	1.6749	0.567506	0.11537	0.227084	0.157415	0.0643878	0.705489	0.568855	0.147664	0.100691	0.0365915	0.0291953
	3256	2499	4427	2588	230	1168	2079	8926	1411	5504	3641	1203	971	4582	6731	2212	793	744	699	1.16563	0.401075	0.710508	0.415359	0.0369137	0.187457	0.333668	1.81301	0.286597	1.11795	0.739546	0.244349	0.197226	0.594547	0.873395	0.287023	0.102897	0.0965393	0.0907002
	1538	3258	1246	2856	1827	2601	1531	6140	2339	996	165	1712	2062	7213	3127	1942	320	316	1297	0.550597	0.522891	0.199976	0.458372	0.293223	0.417446	0.245717	1.24713	0.475089	0.202304	0.0335142	0.347735	0.418825	0.935938	0.40575	0.251988	0.0415223	0.0410032	0.168295
	3200	2875	3030	2695	2693	1768	395	5552	3036	1652	279	1366	361	4510	2120	3250	592	183	608	1.14558	0.461421	0.486298	0.432532	0.432211	0.283754	0.0633953	1.1277	0.616661	0.335548	0.0566694	0.277457	0.0733249	0.585204	0.275085	0.421711	0.0768162	0.0237455	0.0788923
	3289	2374	5954	2371	9822	5211	6807	2876	2589	764	1541	138	347	4147	1671	1088	1685	239	221	1.17745	0.381014	0.955583	0.380532	1.57638	0.836336	1.09248	0.584162	0.525868	0.155181	0.313002	0.02803	0.0704813	0.538103	0.216824	0.141176	0.218641	0.0310119	0.0286763
	1990	2688	6259	1810	731	10024	790	2612	1958	644	469	193	136	6879	1457	691	5192	334	411	0.712411	0.431409	1.00453	0.290495	0.117321	1.6088	0.126791	0.530539	0.397701	0.130807	0.0952615	0.0392014	0.0276238	0.892599	0.189056	0.0896621	0.673699	0.0433389	0.0533302
	2411	2368	7509	3732	6633	420	2184	1831	5834	506	246	358	1074	2099	1938	534	451	98	301	0.863126	0.380051	1.20515	0.598965	1.06456	0.0674076	0.35052	0.371906	1.18498	0.102777	0.0499666	0.0727156	0.218147	0.27236	0.251469	0.0692903	0.0585204	0.0127162	0.0390569
	6500	8662	5983	4215	4043	1413	2242	4748	4139	2176	1667	913	187	11082	1521	1591	602	965	1648	2.32697	1.3902	0.960238	0.676484	0.648879	0.226778	0.359828	0.964395	0.840698	0.441981	0.338595	0.185445	0.0379827	1.43797	0.197361	0.206444	0.0781138	0.125216	0.21384
	2666	5955	3467	1479	7734	7569	3772	7754	1755	3272	2141	462	1051	4765	5556	2486	910	496	608	0.954415	0.955744	0.556434	0.237371	1.24126	1.21478	0.605385	1.57496	0.356469	0.664596	0.434872	0.0938397	0.213475	0.618293	0.72093	0.322576	0.118079	0.0643595	0.0788923
	7506	16226	2043	5754	2993	1328	2407	3488	1025	463	147	672	572	8901	1457	925	632	1028	2377	2.68711	2.60418	0.32789	0.923484	0.48036	0.213136	0.38631	0.708469	0.208194	0.0940428	0.0298581	0.136494	0.116182	1.15497	0.189056	0.120025	0.0820065	0.13339	0.308433
	1376	10886	1740	5559	2589	235	408	5368	2313	1909	167	1980	438	7012	941	646	361	188	156	0.492601	1.74714	0.27926	0.892188	0.41552	0.0377162	0.0654817	1.09033	0.469808	0.387749	0.0339204	0.40217	0.0889649	0.909857	0.122101	0.0838231	0.0468423	0.0243943	0.0202421
	1517	8081	12719	3789	9014	413	605	3995	6346	1706	524	305	1786	6265	4588	1298	1817	891	416	0.543079	1.29695	2.04133	0.608113	1.4467	0.0662842	0.0970991	0.811449	1.28898	0.346516	0.106433	0.0619504	0.362765	0.812928	0.595326	0.168425	0.235769	0.115614	0.0539789
	4043	10158	4905	7212	1495	346	501	4468	1610	848	1731	530	1109	4107	13391	928	1261	168	210	1.44737	1.6303	0.787225	1.15749	0.239939	0.055531	0.0804077	0.907523	0.327017	0.172242	0.351594	0.107652	0.225256	0.532912	1.73758	0.120415	0.163624	0.0217992	0.027249
	2854	2668	7291	2064	6001	306	758	3311	1586	416	219	97	380	18994	1153	387	155	658	104	1.02172	0.428199	1.17016	0.33126	0.963126	0.0491113	0.121655	0.672518	0.322142	0.0844963	0.0444824	0.0197023	0.0771841	2.46461	0.14961	0.050216	0.0201123	0.0853802	0.0134947
	3672	9830	2337	5532	3136	6008	1180	1567	2161	2248	804	159	459	20980	4852	548	448	1071	2225	1.31456	1.57766	0.375075	0.887855	0.50331	0.96425	0.189383	0.318283	0.438934	0.456605	0.163305	0.0322955	0.0932303	2.7223	0.629581	0.0711069	0.0581312	0.13897	0.28871
	5351	6305	5141	8943	2962	555	866	3209	2323	669	417	460	396	4809	2947	678	1793	277	620	1.91563	1.01192	0.825101	1.4353	0.475384	0.0890743	0.138988	0.6518	0.471839	0.135885	0.0846994	0.0934334	0.080434	0.624002	0.382394	0.0879753	0.232654	0.0359427	0.0804494
	3842																			1.37542
	1884																			0.674463
	2233																			0.799403
	1239																			0.443556
	1847																			0.661217
	4032																			1.44344
	1587																			0.568138
	1558																			0.557757
	2234																			0.799761
	3724																			1.33317
	1643																			0.588186
	1353																			0.484368
	1810																			0.647971
	2720																			0.973747
	1440																			0.515513
	2947																			1.05501
	4071																			1.4574
	1880																			0.673031
	2742																			0.981623
	1792																			0.641527
	2939																			1.05215
	953																			0.341169
	1670																			0.597852
	3482																			1.24654
N	48	24	24	24	24	24	24	24	24	24	24	24	24	24	24	24	24	24	24
Ave	2793.33	6230.75	5528.71	4144.79	3923.38	2475.79	1666.33	4923.29	3097.92	1535.25	882.5	758.583	618.25	7706.71	4302.25	1544.21	1157.92	576.667	661.333

## Sheet: Exp2
	5dpf	6dpf						7dpf						8dpf						5dpf	6dpf						7dpf						8dpf
	0mM	0mM	0.625mM	1.25mM	2.5mM	5mM	10mM	0mM	0.625mM	1.25mM	2.5mM	5mM	10mM	0mM	0.625mM	1.25mM	2.5mM	5mM	10mM	0mM	0mM	0.625mM	1.25mM	2.5mM	5mM	10mM	0mM	0.625mM	1.25mM	2.5mM	5mM	10mM	0mM	0.625mM	1.25mM	2.5mM	5mM	10mM
	4947	2196	2030	1016	2005	634	1092	10266	991	501	246	699	1700	2719	617	450	671	235	1223	1.34703	0.468762	0.433328	0.216877	0.427991	0.135335	0.2331	2.07995	0.200783	0.101506	0.0498411	0.141622	0.34443	0.735301	0.166856	0.121694	0.181459	0.0635512	0.330737
	8286	3072	2339	1167	266	2460	463	12628	1241	1245	662	565	1000	2567	922	253	203	676	463	2.25621	0.655755	0.499287	0.24911	0.0567809	0.525116	0.0988328	2.55851	0.251434	0.252244	0.134125	0.114472	0.202606	0.694195	0.249337	0.0684189	0.0548974	0.182811	0.125209
	3368	11075	814	2928	1907	1394	810	5915	2823	833	361	933	789	2398	3197	351	559	345	1634	0.917079	2.36409	0.173758	0.625016	0.407072	0.297566	0.172904	1.19841	0.571957	0.168771	0.0731408	0.189031	0.159856	0.648493	0.864567	0.0949211	0.151171	0.0932986	0.441884
	4219	3490	2306	1540	641	232	609	2548	1804	623	163	392	1444	3218	1258	333	140	262	806	1.1488	0.744982	0.492243	0.328731	0.136829	0.0495232	0.129998	0.51624	0.365501	0.126224	0.0330248	0.0794216	0.292563	0.870246	0.340202	0.0900534	0.0378603	0.0708528	0.217967
	7287	4312	2059	1589	248	1078	2062	4731	1659	1122	394	537	644	2775	514	572	566	163	559	1.98419	0.920448	0.439518	0.339191	0.0529385	0.230112	0.440158	0.958529	0.336123	0.227324	0.0798268	0.108799	0.130478	0.750445	0.139001	0.154686	0.153064	0.0440802	0.151171
	702	9185	1396	1166	888		1302	2522	1118	355	718	394	1220	15020	639	431	704	277	753	0.191149	1.96065	0.297993	0.248897	0.189554		0.277927	0.510972	0.226514	0.0719251	0.145471	0.0798268	0.247179	4.06187	0.172805	0.116556	0.190383	0.0749093	0.203634
	2483	6969	2515	2487	2710	817	540	1717	2055	654	243	881	517	6875	263	228	746	221	2449	0.6761	1.48762	0.536857	0.53088	0.578482	0.174398	0.115269	0.347875	0.416355	0.132504	0.0492333	0.178496	0.104747	1.85921	0.0711232	0.0616582	0.201741	0.0597652	0.662285
	1651	3697	2329	1504	197	1044	1735	3306	1494	684	525	433	740	8009	1011	395	558	349	161	0.449554	0.789169	0.497153	0.321047	0.042052	0.222854	0.370356	0.669816	0.302693	0.138583	0.106368	0.0877284	0.149928	2.16588	0.273405	0.10682	0.1509	0.0943803	0.0435393
	3870	4116	2769	868	171	201	718	5169	1097	692	379	439	1220	2114	734	253	508	93	772	1.05377	0.878609	0.591076	0.185285	0.036502	0.0429058	0.153266	1.04727	0.222259	0.140203	0.0767877	0.088944	0.247179	0.57169	0.198496	0.0684189	0.137379	0.02515	0.208772
	3431	9821	3593	1042	781	516	793	2773	1143	518	624	608	433	1671	620	640	317	376	1019	0.934233	2.09641	0.766968	0.222427	0.166714	0.110146	0.169275	0.561826	0.231579	0.10495	0.126426	0.123184	0.0877284	0.45189	0.167667	0.173076	0.0857265	0.101682	0.275569
	4004	1434	2424	1116	955	968	555	3112	1693	635	362	951	1241	3041	1100	191	476	1329	756	1.09026	0.306104	0.517432	0.238223	0.203856	0.206631	0.118471	0.63051	0.343012	0.128655	0.0733434	0.192678	0.251434	0.822379	0.297474	0.0516522	0.128725	0.359402	0.204446
	4427	1723	1816	629	452	263	1242	3845	1582	625	485	498	1687	2840	1368	749	198	404		1.20544	0.367795	0.387647	0.134268	0.0964848	0.0561405	0.26512	0.77902	0.320523	0.126629	0.0982639	0.100898	0.341796	0.768023	0.369949	0.202553	0.0535453	0.109254
	1738	2868	1154	1468	488	1744	625	13381	1012	449	831	781	632	1376	868	1038	381	641	1273	0.473243	0.612209	0.246335	0.313362	0.104169	0.372278	0.133414	2.71107	0.205037	0.0909701	0.168366	0.158235	0.128047	0.372112	0.234734	0.280707	0.103034	0.173346	0.344258
	5785	2356	5193	1408	1468	924	476	3040	643	1026	1124	267	742	1512	1097	226	166	272	794	1.57521	0.502916	1.10851	0.300554	0.313362	0.197239	0.101608	0.615922	0.130276	0.207874	0.227729	0.0540958	0.150334	0.408891	0.296662	0.0611173	0.0448915	0.0735571	0.214722
	8031	3126	2735	1840	231	1464	725	5367	1456	427	378	749	705	4964	873	344	801	554	683	2.18678	0.667282	0.583818	0.39277	0.0493097	0.312508	0.15476	1.08739	0.294994	0.0865128	0.0765851	0.151752	0.142837	1.34242	0.236086	0.0930281	0.216615	0.149819	0.184704
	3443	10171	2270	4067	860	189	2017	3369		739	463	426	742	3658	751	356	509	1120	1703	0.937501	2.17112	0.484558	0.868149	0.183577	0.0403443	0.430553	0.68258		0.149726	0.0938066	0.0863102	0.150334	0.989235	0.203093	0.0962733	0.137649	0.302882	0.460543
	6157	5227	546	1789	747	274	1021	2572	2888	544	328	969	537	3800	1772	473	279	281	796	1.6765	1.11577	0.11655	0.381883	0.159456	0.0584886	0.217945	0.521103	0.585126	0.110218	0.0664548	0.196325	0.108799	1.02764	0.479203	0.127914	0.0754501	0.075991	0.215263
	1871	3368	1936	1102	1591	731	1210	2223	717	617	641	270	707		1334	539	185	192	1251	0.509458	0.71894	0.413262	0.235235	0.339618	0.156041	0.258289	0.450393	0.145269	0.125008	0.12987	0.0547036	0.143242		0.360754	0.145762	0.0500297	0.0519227	0.338309
	3646	7933	2458	749	1667	768	1803	4966	1669	434	377	556	1781	4617	739	897	303	242	1363	0.992776	1.69339	0.524689	0.159883	0.355841	0.163939	0.384872	1.00614	0.338149	0.087931	0.0763825	0.112649	0.360841	1.24858	0.199848	0.242576	0.0819405	0.0654442	0.368597
	2807	4012	1719	498	224	718	1595	8230	2401	1007	794	393	2169	2500	465	568	235	698	905	0.764323	0.856409	0.366941	0.106304	0.0478155	0.153266	0.340472	1.66745	0.486457	0.204024	0.160869	0.0796242	0.439452	0.676076	0.12575	0.153605	0.0635512	0.188761	0.24474
	2566	3499	2419	1262	410	1820	1498	6262	1578	404	272	479	1494	4775	4731	160	355	314	1158	0.698701	0.746903	0.516364	0.269389	0.0875194	0.388501	0.319766	1.26872	0.319712	0.0818528	0.0551088	0.0970483	0.302693	1.29131	1.27941	0.0432689	0.0960029	0.0849152	0.313159
	4689	3737	394	1389	1755	1473	1202	3631	3381	698	975	435	1756	2235	816	523	191	175	421	1.27678	0.797707	0.084104	0.296499	0.374626	0.314429	0.256581	0.735662	0.685011	0.141419	0.197541	0.0881336	0.355776	0.604412	0.220671	0.141435	0.0516522	0.0473254	0.113851
	2462	4543	5150	1836	1391	1207	893	2750	1112	928	674	568	1754	3589	553	780	558	771	1016	0.670382	0.969757	1.09933	0.391916	0.296925	0.257648	0.190621	0.557167	0.225298	0.188018	0.136556	0.11508	0.355371	0.970575	0.149548	0.210936	0.1509	0.208502	0.274757
	1012	4732	2273	1759	951	593	602	2889	1540	572	263	557	1420	2243	811	797	74	422	562	0.275559	1.0101	0.485199	0.375479	0.203002	0.126583	0.128504	0.585329	0.312013	0.115891	0.0532854	0.112852	0.287701	0.606576	0.219319	0.215533	0.0200119	0.114122	0.151982
	7180		4541	1031	732	571	1558	6667	1337	859	452	343	549	2277	899	616	154	190	778	1.95505		0.96933	0.220079	0.156254	0.121887	0.332574	1.35077	0.270884	0.174039	0.0915779	0.0694939	0.111231	0.61577	0.243117	0.166585	0.0416463	0.0513818	0.210395
	979	5513	2317	735	346	859	1552	2624	1261	687	552	589	1370	3143	2888	256	228	941	968	0.266574	1.17682	0.494591	0.156894	0.0738578	0.183364	0.331293	0.531638	0.255486	0.13919	0.111839	0.119335	0.27757	0.849963	0.781004	0.0692302	0.0616582	0.254475	0.261777
	1798	1660	3508	1037	356	216	597	4870	2917	717	745	602		3694	1004	528	383	507	1193	0.489581	0.354347	0.748824	0.22136	0.0759924	0.0461078	0.127437	0.986691	0.591002	0.145269	0.150941	0.121969		0.998971	0.271512	0.142787	0.103575	0.137108	0.322624
	2169	6542	2205	868	254	404	1497	9247	1429	610	394	246	310	3299	526	320	653	383	1288	0.590601	1.39647	0.470683	0.185285	0.0542193	0.0862386	0.319552	1.8735	0.289524	0.12359	0.0798268	0.0498411	0.0628079	0.892151	0.142246	0.0865378	0.176591	0.103575	0.348315
	2464	2853	1813	1028	486	829	460	2553	1403	655	379	404	686	2039	678	282	376	220	297	0.670927	0.609007	0.387006	0.219439	0.103742	0.17696	0.0981925	0.517253	0.284256	0.132707	0.0767877	0.0818528	0.138988	0.551408	0.183352	0.0762614	0.101682	0.0594947	0.0803179
	3930	5154	2281	277	302	540	2045	3969	862	258	463	603	1016	6053	846	1505	184	149	1110	1.07011	1.10018	0.486907	0.0591289	0.0644655	0.115269	0.43653	0.804143	0.174646	0.0522724	0.0938066	0.122171	0.205848	1.63692	0.228784	0.406998	0.0497592	0.0402942	0.300178
	2517	2932	3485	7234	1042	2112	404	3705	951	378	335	634	520	3506	792	616	202	350	346	0.685358	0.62587	0.743915	1.54418	0.222427	0.450831	0.0862386	0.750655	0.192678	0.0765851	0.067873	0.128452	0.105355	0.94813	0.214181	0.166585	0.054627	0.0946507	0.093569
	3602	3909	1887	2494	483	1041	1322	7095	1321	624	288	600	877	2105	1161	1334	459	165	541	0.980795	0.834422	0.402803	0.532374	0.103102	0.222214	0.282197	1.43749	0.267643	0.126426	0.0583505	0.121564	0.177685	0.569256	0.31397	0.360754	0.124128	0.044621	0.146303
N	32	31	32	32	32	31	32	32	31	32	32	32	31	31	32	32	32	32	31	32	31	32	32	32	31	32	32	31	32	32	32	31	31	32	32	32	32	31
Ave	3672.53	4684.68	2396.06	1591.34	843.906	905.935	1094.47	4935.69	1567.03	660	496.562	556.281	1045.23	3697.81	1120.22	531.375	385.062	416.156	936.806	1	1	0.511468	0.339691	0.180142	0.193383	0.233627	1	0.31749	0.13372	0.100607	0.112706	0.211769	1	0.302941	0.1437	0.104133	0.112541	0.253341

## Sheet: Combined
	5dpf	6dpf						7dpf						8dpf
	0mM	0mM	0.625mM	1.25mM	2.5mM	5mM	10mM	0mM	0.625mM	1.25mM	2.5mM	5mM	10mM	0mM	0.625mM	1.25mM	2.5mM	5mM	10mM
	1.16313	5.20644	0.439273	0.797175	0.281507	0.201581	0.900373	0.650175	1.32818	0.165946	0.0428575	0.160665	0.119229	1.33235	0.172447	0.276642	0.0874563	0.0323095	0.0202421
	0.838067	0.36352	0.196927	0.310236	2.10119	0.437829	0.131445	0.580506	1.44477	0.512259	0.132635	0.323361	0.0351391	1.03533	0.270544	0.379669	0.339964	0.0312715	0.0202421
	2.07387	0.448742	2.78442	0.221643	0.33126	0.268026	0.350359	1.51748	1.03	0.724515	0.0649972	0.0907929	0.0869337	1.23659	0.713664	0.300388	0.174913	0.0334773	0.175561
	0.297494	0.261606	1.19311	1.10179	0.634755	0.287766	0.0940497	1.23982	0.0881524	0.159243	0.295737	0.315439	0.0369671	2.59657	0.393294	0.09083	0.226037	0.242127	0.0491779
	0.665513	0.556755	0.46752	0.199976	0.188902	0.75641	0.229346	2.27246	0.400139	0.0936365	0.0672314	0.034936	0.120245	0.282741	1.05648	0.182179	0.082266	0.0198528	0.0380188
	1.13019	0.257593	0.783212	0.92204	0.174939	0.0327408	0.0751113	0.46148	0.275222	0.125932	0.308127	0.14929	0.0635754	0.711847	1.14952	0.0792816	0.082785	0.209817	0.0421711
	0.665155	0.42547	1.42342	1.58697	0.372026	0.866669	0.042852	0.847401	0.596958	0.424513	0.199054	0.198241	0.0662159	0.884684	0.207352	0.24576	0.123529	0.0438579	0.0225777
	1.57482	0.404606	1.44156	0.208482	0.624323	0.277495	0.121494	1.3816	1.15979	0.333923	0.0885586	0.125323	0.120042	0.117819	1.93027	0.614659	0.180881	0.153113	0.118079
	1.3611	0.855114	0.681619	0.891064	0.468322	0.0900373	0.216346	1.6749	0.567506	0.11537	0.227084	0.157415	0.0643878	0.705489	0.568855	0.147664	0.100691	0.0365915	0.0291953
	1.16563	0.401075	0.710508	0.415359	0.0369137	0.187457	0.333668	1.81301	0.286597	1.11795	0.739546	0.244349	0.197226	0.594547	0.873395	0.287023	0.102897	0.0965393	0.0907002
	0.550597	0.522891	0.199976	0.458372	0.293223	0.417446	0.245717	1.24713	0.475089	0.202304	0.0335142	0.347735	0.418825	0.935938	0.40575	0.251988	0.0415223	0.0410032	0.168295
	1.14558	0.461421	0.486298	0.432532	0.432211	0.283754	0.0633953	1.1277	0.616661	0.335548	0.0566694	0.277457	0.0733249	0.585204	0.275085	0.421711	0.0768162	0.0237455	0.0788923
	1.17745	0.381014	0.955583	0.380532	1.57638	0.836336	1.09248	0.584162	0.525868	0.155181	0.313002	0.02803	0.0704813	0.538103	0.216824	0.141176	0.218641	0.0310119	0.0286763
	0.712411	0.431409	1.00453	0.290495	0.117321	1.6088	0.126791	0.530539	0.397701	0.130807	0.0952615	0.0392014	0.0276238	0.892599	0.189056	0.0896621	0.673699	0.0433389	0.0533302
	0.863126	0.380051	1.20515	0.598965	1.06456	0.0674076	0.35052	0.371906	1.18498	0.102777	0.0499666	0.0727156	0.218147	0.27236	0.251469	0.0692903	0.0585204	0.0127162	0.0390569
	2.32697	1.3902	0.960238	0.676484	0.648879	0.226778	0.359828	0.964395	0.840698	0.441981	0.338595	0.185445	0.0379827	1.43797	0.197361	0.206444	0.0781138	0.125216	0.21384
	0.954415	0.955744	0.556434	0.237371	1.24126	1.21478	0.605385	1.57496	0.356469	0.664596	0.434872	0.0938397	0.213475	0.618293	0.72093	0.322576	0.118079	0.0643595	0.0788923
	2.68711	2.60418	0.32789	0.923484	0.48036	0.213136	0.38631	0.708469	0.208194	0.0940428	0.0298581	0.136494	0.116182	1.15497	0.189056	0.120025	0.0820065	0.13339	0.308433
	0.492601	1.74714	0.27926	0.892188	0.41552	0.0377162	0.0654817	1.09033	0.469808	0.387749	0.0339204	0.40217	0.0889649	0.909857	0.122101	0.0838231	0.0468423	0.0243943	0.0202421
	0.543079	1.29695	2.04133	0.608113	1.4467	0.0662842	0.0970991	0.811449	1.28898	0.346516	0.106433	0.0619504	0.362765	0.812928	0.595326	0.168425	0.235769	0.115614	0.0539789
	1.44737	1.6303	0.787225	1.15749	0.239939	0.055531	0.0804077	0.907523	0.327017	0.172242	0.351594	0.107652	0.225256	0.532912	1.73758	0.120415	0.163624	0.0217992	0.027249
	1.02172	0.428199	1.17016	0.33126	0.963126	0.0491113	0.121655	0.672518	0.322142	0.0844963	0.0444824	0.0197023	0.0771841	2.46461	0.14961	0.050216	0.0201123	0.0853802	0.0134947
	1.31456	1.57766	0.375075	0.887855	0.50331	0.96425	0.189383	0.318283	0.438934	0.456605	0.163305	0.0322955	0.0932303	2.7223	0.629581	0.0711069	0.0581312	0.13897	0.28871
	1.91563	1.01192	0.825101	1.4353	0.475384	0.0890743	0.138988	0.6518	0.471839	0.135885	0.0846994	0.0934334	0.080434	0.624002	0.382394	0.0879753	0.232654	0.0359427	0.0804494
	1.37542
	0.674463
	0.799403
	0.443556
	0.661217
	1.44344
	0.568138
	0.557757
	0.799761
	1.33317
	0.588186
	0.484368
	0.647971
	0.973747
	0.515513
	1.05501
	1.4574
	0.673031
	0.981623
	0.641527
	1.05215
	0.341169
	0.597852
	1.24654
	1.34703	0.468762	0.433328	0.216877	0.427991	0.135335	0.2331	2.07995	0.200783	0.101506	0.0498411	0.141622	0.34443	0.735301	0.166856	0.121694	0.181459	0.0635512	0.330737
	2.25621	0.655755	0.499287	0.24911	0.0567809	0.525116	0.0988328	2.55851	0.251434	0.252244	0.134125	0.114472	0.202606	0.694195	0.249337	0.0684189	0.0548974	0.182811	0.125209
	0.917079	2.36409	0.173758	0.625016	0.407072	0.297566	0.172904	1.19841	0.571957	0.168771	0.0731408	0.189031	0.159856	0.648493	0.864567	0.0949211	0.151171	0.0932986	0.441884
	1.1488	0.744982	0.492243	0.328731	0.136829	0.0495232	0.129998	0.51624	0.365501	0.126224	0.0330248	0.0794216	0.292563	0.870246	0.340202	0.0900534	0.0378603	0.0708528	0.217967
	1.98419	0.920448	0.439518	0.339191	0.0529385	0.230112	0.440158	0.958529	0.336123	0.227324	0.0798268	0.108799	0.130478	0.750445	0.139001	0.154686	0.153064	0.0440802	0.151171
	0.191149	1.96065	0.297993	0.248897	0.189554		0.277927	0.510972	0.226514	0.0719251	0.145471	0.0798268	0.247179	4.06187	0.172805	0.116556	0.190383	0.0749093	0.203634
	0.6761	1.48762	0.536857	0.53088	0.578482	0.174398	0.115269	0.347875	0.416355	0.132504	0.0492333	0.178496	0.104747	1.85921	0.0711232	0.0616582	0.201741	0.0597652	0.662285
	0.449554	0.789169	0.497153	0.321047	0.042052	0.222854	0.370356	0.669816	0.302693	0.138583	0.106368	0.0877284	0.149928	2.16588	0.273405	0.10682	0.1509	0.0943803	0.0435393
	1.05377	0.878609	0.591076	0.185285	0.036502	0.0429058	0.153266	1.04727	0.222259	0.140203	0.0767877	0.088944	0.247179	0.57169	0.198496	0.0684189	0.137379	0.02515	0.208772
	0.934233	2.09641	0.766968	0.222427	0.166714	0.110146	0.169275	0.561826	0.231579	0.10495	0.126426	0.123184	0.0877284	0.45189	0.167667	0.173076	0.0857265	0.101682	0.275569
	1.09026	0.306104	0.517432	0.238223	0.203856	0.206631	0.118471	0.63051	0.343012	0.128655	0.0733434	0.192678	0.251434	0.822379	0.297474	0.0516522	0.128725	0.359402	0.204446
	1.20544	0.367795	0.387647	0.134268	0.0964848	0.0561405	0.26512	0.77902	0.320523	0.126629	0.0982639	0.100898	0.341796	0.768023	0.369949	0.202553	0.0535453	0.109254
	0.473243	0.612209	0.246335	0.313362	0.104169	0.372278	0.133414	2.71107	0.205037	0.0909701	0.168366	0.158235	0.128047	0.372112	0.234734	0.280707	0.103034	0.173346	0.344258
	1.57521	0.502916	1.10851	0.300554	0.313362	0.197239	0.101608	0.615922	0.130276	0.207874	0.227729	0.0540958	0.150334	0.408891	0.296662	0.0611173	0.0448915	0.0735571	0.214722
	2.18678	0.667282	0.583818	0.39277	0.0493097	0.312508	0.15476	1.08739	0.294994	0.0865128	0.0765851	0.151752	0.142837	1.34242	0.236086	0.0930281	0.216615	0.149819	0.184704
	0.937501	2.17112	0.484558	0.868149	0.183577	0.0403443	0.430553	0.68258		0.149726	0.0938066	0.0863102	0.150334	0.989235	0.203093	0.0962733	0.137649	0.302882	0.460543
	1.6765	1.11577	0.11655	0.381883	0.159456	0.0584886	0.217945	0.521103	0.585126	0.110218	0.0664548	0.196325	0.108799	1.02764	0.479203	0.127914	0.0754501	0.075991	0.215263
	0.509458	0.71894	0.413262	0.235235	0.339618	0.156041	0.258289	0.450393	0.145269	0.125008	0.12987	0.0547036	0.143242		0.360754	0.145762	0.0500297	0.0519227	0.338309
	0.992776	1.69339	0.524689	0.159883	0.355841	0.163939	0.384872	1.00614	0.338149	0.087931	0.0763825	0.112649	0.360841	1.24858	0.199848	0.242576	0.0819405	0.0654442	0.368597
	0.764323	0.856409	0.366941	0.106304	0.0478155	0.153266	0.340472	1.66745	0.486457	0.204024	0.160869	0.0796242	0.439452	0.676076	0.12575	0.153605	0.0635512	0.188761	0.24474
	0.698701	0.746903	0.516364	0.269389	0.0875194	0.388501	0.319766	1.26872	0.319712	0.0818528	0.0551088	0.0970483	0.302693	1.29131	1.27941	0.0432689	0.0960029	0.0849152	0.313159
	1.27678	0.797707	0.084104	0.296499	0.374626	0.314429	0.256581	0.735662	0.685011	0.141419	0.197541	0.0881336	0.355776	0.604412	0.220671	0.141435	0.0516522	0.0473254	0.113851
	0.670382	0.969757	1.09933	0.391916	0.296925	0.257648	0.190621	0.557167	0.225298	0.188018	0.136556	0.11508	0.355371	0.970575	0.149548	0.210936	0.1509	0.208502	0.274757
	0.275559	1.0101	0.485199	0.375479	0.203002	0.126583	0.128504	0.585329	0.312013	0.115891	0.0532854	0.112852	0.287701	0.606576	0.219319	0.215533	0.0200119	0.114122	0.151982
	1.95505		0.96933	0.220079	0.156254	0.121887	0.332574	1.35077	0.270884	0.174039	0.0915779	0.0694939	0.111231	0.61577	0.243117	0.166585	0.0416463	0.0513818	0.210395
	0.266574	1.17682	0.494591	0.156894	0.0738578	0.183364	0.331293	0.531638	0.255486	0.13919	0.111839	0.119335	0.27757	0.849963	0.781004	0.0692302	0.0616582	0.254475	0.261777
	0.489581	0.354347	0.748824	0.22136	0.0759924	0.0461078	0.127437	0.986691	0.591002	0.145269	0.150941	0.121969		0.998971	0.271512	0.142787	0.103575	0.137108	0.322624
	0.590601	1.39647	0.470683	0.185285	0.0542193	0.0862386	0.319552	1.8735	0.289524	0.12359	0.0798268	0.0498411	0.0628079	0.892151	0.142246	0.0865378	0.176591	0.103575	0.348315
	0.670927	0.609007	0.387006	0.219439	0.103742	0.17696	0.0981925	0.517253	0.284256	0.132707	0.0767877	0.0818528	0.138988	0.551408	0.183352	0.0762614	0.101682	0.0594947	0.0803179
	1.07011	1.10018	0.486907	0.0591289	0.0644655	0.115269	0.43653	0.804143	0.174646	0.0522724	0.0938066	0.122171	0.205848	1.63692	0.228784	0.406998	0.0497592	0.0402942	0.300178
	0.685358	0.62587	0.743915	1.54418	0.222427	0.450831	0.0862386	0.750655	0.192678	0.0765851	0.067873	0.128452	0.105355	0.94813	0.214181	0.166585	0.054627	0.0946507	0.093569
	0.980795	0.834422	0.402803	0.532374	0.103102	0.222214	0.282197	1.43749	0.267643	0.126426	0.0583505	0.121564	0.177685	0.569256	0.31397	0.360754	0.124128	0.044621	0.146303
N	80	55	56	56	56	55	56	56	55	56	56	56	55	55	56	56	56	56	55
Ave	1	1	0.67255	0.479202	0.372801	0.282387	0.248117	1	0.453525	0.210055	0.134311	0.130438	0.174158	1	0.412358	0.167988	0.123896	0.0963779	0.180238
SD	0.525595	0.81595	0.470167	0.365894	0.415569	0.30836	0.191107	0.558739	0.318212	0.189334	0.122552	0.0806639	0.108561	0.693534	0.387345	0.113768	0.099979	0.0747776	0.13817
SE	0.0587633	0.110023	0.0628287	0.0488947	0.0555327	0.0415792	0.0255377	0.0746646	0.0429077	0.0253008	0.0163767	0.0107792	0.0146383	0.0935161	0.0517612	0.0152029	0.0133603	0.00999257	0.0186309
