# Supplementary material for: Large-scale phenotypic drug screen identifies neuroprotectants in zebrafish and mouse models of retinitis pigmentosa
Source: eLife. 2021 Jun 29;10:e57245. doi: 10.7554/eLife.57245 (PMC8425951; doi:10.7554/eLife.57245)
Supplement: Figure 2—figure supplement 1—source data 1. [file elife-57245-fig2-figsupp1-data1.xlsx]

## Sheet: WAR
Inhibition at 300 µM Warfarin
	0	5	10	15	20	25	30	35	40	45	50	55	60	65	70	75	80	85	90	95	100	105	110	115	120	125	130	135	140	145	150	155	160	165	170	175	180	185	190	195	200	205	210	215	220	225	230	235	240
Control 1	0.0619167	0.0624167	0.06325	0.0649167	0.0659167	0.06675	0.0676667	0.0691667	0.0696667	0.0710833	0.0716667	0.07225	0.0728333	0.0749167	0.0753333	0.0755	0.078	0.07725	0.078	0.0796667	0.0808333	0.0800833	0.0815833	0.082	0.0828333	0.0834167	0.0841667	0.0846667	0.0850833	0.0860833	0.0869167	0.08675	0.08775	0.0874167	0.0889167	0.08875	0.077
WAR 1	0.055	0.057	0.053	0.056	0.058	0.057	0.058	0.058	0.059	0.058	0.058	0.061	0.061	0.06	0.062	0.061	0.062	0.063	0.063	0.063	0.061	0.065	0.062	0.062	0.061	0.062	0.064	0.063	0.064	0.063	0.068	0.063	0.064	0.064	0.066	0.067	0.065	0.065	0.066	0.067	0.067	0.067	0.068	0.067	0.066	0.067	0.069	0.071	0.069
WAR 2	0.055	0.055	0.054	0.055	0.054	0.056	0.055	0.058	0.058	0.057	0.057	0.057	0.06	0.058	0.057	0.06	0.06	0.062	0.061	0.06	0.06	0.062	0.062	0.062	0.061	0.06	0.063	0.064	0.064	0.063	0.063	0.065	0.063	0.064	0.065	0.065	0.065	0.064	0.066	0.068	0.066	0.068	0.069	0.068	0.065	0.069	0.067	0.068	0.068
WAR 3	0.059	0.056	0.054	0.058	0.055	0.056	0.058	0.057	0.056	0.057	0.058	0.057	0.059	0.059	0.058	0.058	0.06	0.059	0.061	0.061	0.061	0.06	0.062	0.062	0.062	0.063	0.06	0.063	0.064	0.063	0.064	0.064	0.064	0.066	0.065	0.065	0.067	0.067	0.066	0.067	0.066	0.069	0.067	0.066	0.068	0.068	0.067	0.068	0.069
	Average A420 increase/sec
	Rep 1	Rep 2	Rep 3	% of Control Rate Rep 1	% of Control Rate Rep 2	% of Control Rate Rep 3	Average %	% Inhibition	% StDev
Control	0.000157	0.000157	0.000157	100	100	100	100	0	0
WAR	5e-05	6.6e-05	5.3e-05	31.8979	42.1053	33.8118	35.9383	64.0617	5.42577
IC50 Kinetic Assay Calculation:
	5	10	15	20	25	30	35	40	45	50	55	60	65	70	75	80	85	90	95	100	105	110	115	120	125	130	135	140	145	150	155	160	165	170	175	180	185	190	195	200	205	210	215	220	225	230	235	240	245
0 µM 1	0.101	0.102	0.1	0.102	0.105	0.107	0.107	0.107	0.109	0.11	0.11	0.114	0.114	0.115	0.116	0.117	0.117	0.119	0.122	0.122	0.121	0.123	0.125	0.125	0.127	0.126	0.127	0.129	0.129	0.13	0.13	0.13	0.131	0.129	0.129	0.13	0.13	0.129	0.132	0.13	0.131	0.13	0.131	0.13	0.132	0.13	0.131	0.131	0.129
0 µM 2	0.079	0.079	0.08	0.082	0.083	0.09	0.098	0.099	0.102	0.103	0.102	0.103	0.106	0.104	0.107	0.109	0.111	0.112	0.114	0.113	0.115	0.115	0.118	0.118	0.118	0.12	0.122	0.121	0.121	0.121	0.122	0.121	0.121	0.121	0.119	0.121	0.122	0.121	0.12	0.121	0.12	0.128	0.12	0.119	0.115	0.119	0.12	0.121	0.119
0 µM 3	0.073	0.07	0.072	0.071	0.075	0.075	0.077	0.076	0.077	0.08	0.081	0.083	0.082	0.084	0.086	0.086	0.088	0.09	0.09	0.092	0.092	0.094	0.092	0.095	0.094	0.094	0.097	0.099	0.099	0.097	0.098	0.099	0.101	0.101	0.099	0.1	0.098	0.099	0.099	0.099	0.099	0.099	0.1	0.101	0.101	0.101	0.101	0.098	0.1
10 µM 1	0.066	0.068	0.067	0.067	0.07	0.071	0.07	0.071	0.072	0.074	0.073	0.076	0.076	0.079	0.078	0.081	0.081	0.083	0.081	0.079	0.082	0.084	0.083	0.087	0.085	0.086	0.088	0.089	0.089	0.09	0.091	0.091	0.092	0.092	0.093	0.093	0.096	0.095	0.096	0.096	0.096	0.096	0.099	0.098	0.098	0.099	0.099	0.099	0.098
10 µM 2	0.064	0.066	0.069	0.068	0.065	0.067	0.072	0.071	0.074	0.076	0.076	0.078	0.075	0.077	0.076	0.073	0.075	0.077	0.077	0.077	0.077	0.078	0.077	0.084	0.085	0.088	0.088	0.089	0.09	0.089	0.091	0.091	0.091	0.092	0.091	0.093	0.093	0.094	0.093	0.095	0.094	0.094	0.094	0.094	0.095	0.095	0.095	0.096	0.096
10 µM 3	0.07	0.069	0.069	0.069	0.069	0.071	0.075	0.074	0.076	0.076	0.077	0.077	0.079	0.079	0.082	0.083	0.083	0.083	0.087	0.085	0.087	0.086	0.087	0.088	0.09	0.091	0.091	0.093	0.093	0.094	0.094	0.094	0.096	0.097	0.097	0.097	0.096	0.098	0.1	0.1	0.102	0.102	0.102	0.102	0.102	0.103	0.1	0.099	0.101
25 µM 1	0.083	0.081	0.081	0.078	0.082	0.083	0.084	0.084	0.086	0.088	0.091	0.091	0.091	0.093	0.089	0.09	0.092	0.094	0.093	0.095	0.098	0.096	0.099	0.099	0.102	0.1	0.098	0.101	0.102	0.102	0.104	0.104	0.105	0.104	0.106	0.106	0.108	0.106	0.109	0.109	0.109	0.11	0.112	0.111	0.112	0.11	0.113	0.115	0.113
25 µM 2	0.071	0.069	0.07	0.068	0.066	0.071	0.073	0.07	0.071	0.074	0.076	0.074	0.075	0.078	0.077	0.079	0.08	0.08	0.083	0.082	0.084	0.083	0.085	0.087	0.086	0.088	0.087	0.09	0.091	0.091	0.09	0.091	0.092	0.093	0.094	0.095	0.094	0.095	0.097	0.094	0.098	0.097	0.098	0.097	0.098	0.098	0.099	0.1	0.099
25 µM 3	0.069	0.07	0.066	0.068	0.068	0.069	0.069	0.069	0.072	0.071	0.071	0.074	0.075	0.076	0.075	0.079	0.078	0.077	0.081	0.078	0.081	0.081	0.081	0.082	0.084	0.085	0.084	0.085	0.086	0.087	0.088	0.089	0.088	0.09	0.091	0.09	0.088	0.092	0.093	0.094	0.094	0.097	0.096	0.096	0.093	0.097	0.097	0.097	0.098
50 µM 1	0.065	0.068	0.066	0.063	0.064	0.063	0.065	0.065	0.069	0.073	0.073	0.069	0.071	0.07	0.07	0.072	0.073	0.074	0.074	0.073	0.076	0.075	0.077	0.079	0.08	0.08	0.084	0.08	0.08	0.082	0.083	0.084	0.084	0.085	0.088	0.086	0.088	0.087	0.086	0.089	0.086	0.087	0.087	0.089	0.091	0.089	0.091	0.091	0.092
50 µM 2	0.065	0.067	0.065	0.064	0.062	0.066	0.069	0.07	0.07	0.07	0.072	0.071	0.072	0.074	0.074	0.075	0.075	0.076	0.078	0.078	0.08	0.08	0.08	0.08	0.082	0.082	0.083	0.083	0.083	0.085	0.086	0.086	0.087	0.087	0.086	0.09	0.09	0.089	0.091	0.088	0.09	0.092	0.092	0.091	0.094	0.094	0.092	0.095	0.095
50 µM 3	0.066	0.063	0.066	0.065	0.065	0.065	0.066	0.068	0.068	0.07	0.07	0.071	0.071	0.073	0.075	0.073	0.076	0.078	0.077	0.075	0.078	0.079	0.077	0.081	0.08	0.083	0.083	0.082	0.084	0.083	0.085	0.085	0.089	0.087	0.089	0.088	0.088	0.088	0.089	0.09	0.09	0.09	0.091	0.092	0.093	0.094	0.094	0.093	0.094
100 µM 1	0.06	0.058	0.059	0.058	0.059	0.061	0.062	0.06	0.062	0.064	0.065	0.066	0.063	0.065	0.067	0.068	0.067	0.07	0.07	0.07	0.071	0.069	0.071	0.07	0.073	0.074	0.074	0.075	0.076	0.076	0.074	0.076	0.079	0.077	0.077	0.079	0.079	0.081	0.082	0.08	0.081	0.083	0.083	0.083	0.085	0.083	0.085	0.085	0.084
100 µM 2	0.064	0.07	0.07	0.07	0.072	0.071	0.071	0.072	0.075	0.077	0.078	0.079	0.079	0.079	0.08	0.078	0.08	0.079	0.078	0.079	0.083	0.083	0.087	0.087	0.087	0.087	0.088	0.09	0.09	0.093	0.092	0.091	0.092	0.089	0.088	0.089	0.087	0.086	0.088	0.087	0.09	0.089	0.092	0.094	0.095	0.097	0.096	0.1	0.098
100 µM 3	0.062	0.063	0.063	0.063	0.062	0.061	0.064	0.065	0.068	0.065	0.066	0.069	0.069	0.07	0.073	0.074	0.074	0.076	0.075	0.076	0.077	0.077	0.079	0.076	0.08	0.078	0.082	0.08	0.082	0.083	0.081	0.085	0.083	0.083	0.084	0.085	0.086	0.085	0.088	0.088	0.089	0.087	0.089	0.091	0.091	0.091	0.089	0.09	0.091
150 µM 1	0.06	0.059	0.062	0.063	0.063	0.064	0.064	0.066	0.063	0.067	0.066	0.068	0.065	0.065	0.066	0.068	0.068	0.069	0.068	0.069	0.069	0.07	0.071	0.07	0.073	0.071	0.073	0.072	0.074	0.073	0.075	0.076	0.075	0.075	0.076	0.078	0.078	0.079	0.081	0.077	0.08	0.081	0.082	0.081	0.082	0.082	0.082	0.084	0.082
150 µM 2	0.059	0.057	0.062	0.058	0.06	0.059	0.061	0.062	0.066	0.066	0.063	0.065	0.066	0.068	0.068	0.066	0.069	0.07	0.068	0.071	0.07	0.073	0.072	0.074	0.073	0.075	0.074	0.075	0.076	0.077	0.073	0.074	0.077	0.077	0.078	0.078	0.079	0.08	0.08	0.081	0.08	0.083	0.081	0.083	0.083	0.083	0.084	0.084	0.086
150 µM 3	0.06	0.061	0.061	0.064	0.063	0.062	0.062	0.063	0.064	0.063	0.065	0.065	0.067	0.066	0.068	0.068	0.069	0.07	0.07	0.07	0.07	0.072	0.072	0.074	0.072	0.072	0.075	0.075	0.075	0.074	0.076	0.074	0.076	0.076	0.078	0.08	0.08	0.081	0.08	0.081	0.08	0.083	0.084	0.084	0.081	0.083	0.083	0.084	0.086
200 µM 1	0.061	0.056	0.061	0.061	0.062	0.061	0.062	0.063	0.062	0.064	0.063	0.063	0.064	0.062	0.066	0.066	0.066	0.067	0.066	0.069	0.07	0.068	0.071	0.069	0.07	0.07	0.07	0.074	0.072	0.072	0.074	0.072	0.076	0.076	0.073	0.075	0.078	0.078	0.078	0.078	0.078	0.078	0.078	0.08	0.081	0.082	0.082	0.085	0.081
200 µM 2	0.058	0.059	0.059	0.059	0.058	0.059	0.058	0.059	0.062	0.062	0.063	0.064	0.065	0.066	0.064	0.065	0.066	0.066	0.069	0.069	0.068	0.069	0.069	0.069	0.07	0.072	0.07	0.071	0.073	0.074	0.075	0.072	0.075	0.076	0.074	0.078	0.077	0.076	0.076	0.079	0.076	0.079	0.08	0.081	0.081	0.082	0.08	0.08	0.082
200 µM 3	0.059	0.059	0.057	0.058	0.064	0.071	0.082	0.083	0.071	0.076	0.071	0.068	0.069	0.074	0.081	0.078	0.08	0.078	0.078	0.082	0.077	0.079	0.088	0.082	0.088	0.085	0.081	0.083	0.081	0.079	0.08	0.082	0.077	0.079	0.079	0.081	0.08	0.079	0.079	0.083	0.086	0.086	0.085	0.088	0.087	0.089	0.088	0.088	0.087
300 µM 1	0.059	0.06	0.059	0.058	0.06	0.06	0.059	0.06	0.062	0.061	0.062	0.064	0.063	0.062	0.062	0.064	0.066	0.064	0.065	0.066	0.067	0.068	0.066	0.07	0.07	0.068	0.069	0.067	0.07	0.07	0.07	0.071	0.072	0.071	0.073	0.071	0.072	0.073	0.073	0.074	0.076	0.077	0.075	0.077	0.075	0.077	0.079	0.078	0.077
300 µM 2	0.063	0.06	0.06	0.061	0.061	0.06	0.059	0.059	0.062	0.061	0.063	0.063	0.062	0.065	0.066	0.066	0.067	0.066	0.067	0.068	0.067	0.069	0.069	0.07	0.068	0.069	0.07	0.072	0.07	0.07	0.072	0.073	0.072	0.073	0.076	0.075	0.075	0.072	0.075	0.077	0.075	0.076	0.075	0.077	0.077	0.08	0.078	0.079	0.08
300 µM 3	0.056	0.057	0.056	0.059	0.056	0.061	0.06	0.059	0.057	0.059	0.061	0.06	0.061	0.062	0.063	0.063	0.064	0.064	0.066	0.066	0.067	0.066	0.066	0.067	0.069	0.068	0.068	0.07	0.07	0.068	0.07	0.069	0.071	0.071	0.073	0.07	0.071	0.073	0.074	0.075	0.073	0.075	0.075	0.077	0.076	0.076	0.075	0.077	0.077
																																0.00022
																																0.00021		0.000206667	1.52753e-05
																																0.00019
																																8.8e-05		0.0946237
																																0.000101		48.871		16.3516
																																8.3e-05		0.0892473
																																0.000109		52.7419		49.3548
																																9.5e-05		45.9677
																																0.00013		0.139785		0.116487
																																0.000109		0.117204
																																8.6e-05		0.0924731
																																0.000152		0.163441		0.147312
																																0.000122		0.131183
																																0.000151		0.162366
																																0.000152		0.163441		0.159498
																																0.000142		0.152688
																																0.000157		0.168817
																																0.00017		0.182796		0.173835
																																0.000158		0.169892
																																0.000159		0.170968		0.176703
																																0.000181		0.194624
																																0.000153		0.164516
	WAR conc (µM)	Average % rate vs Control	SD
	0	100	0
	25	78.2258	3.50041
	50	71.7742	2.66495
	100	66.2903	10.2645
	150	52.4194	10.6488
	200	49.3548	4.79008
	300	43.871	4.49592
Metronidazole Kinetics
TIME	18	19	20	21	22	23	24	25	26	27	28	29	30	31	32	33	34	35	36	37	38	39	40	41	42	43	44	45	46	47	48	49	50	51	52	53	54	55	56	57	58	59	60	61	62	63	64	65	66
300 µM WAR	0.41	0.409	0.409	0.408	0.408	0.408	0.407	0.407	0.408	0.408	0.407	0.407	0.407	0.407	0.407	0.408	0.407	0.407	0.408	0.407	0.406	0.407	0.406	0.406	0.407	0.407	0.407	0.406	0.406	0.406	0.406	0.406	0.406	0.407	0.407	0.406	0.405	0.406	0.406	0.406	0.406	0.406	0.406	0.405	0.405	0.405	0.405	0.406	0.405
TIME	19	20	21	22	23	24	25	26	27	28	29	30	31	32	33	34	35	36	37	38	39	40	41	42	43	44	45	46	47	48	49	50	51	52	53	54	55	56	57	58	59	60	61	62	63	64	65	66	67
Control	0.373	0.371	0.371	0.37	0.371	0.37	0.37	0.371	0.371	0.371	0.371	0.371	0.37	0.37	0.37	0.37	0.37	0.369	0.369	0.369	0.368	0.369	0.368	0.369	0.369	0.369	0.369	0.369	0.369	0.368	0.368	0.368	0.368	0.368	0.368	0.367	0.367	0.368	0.367	0.367	0.367	0.367	0.367	0.366	0.366	0.366	0.365	0.366	0.365
																% activity vs Control
																22.5989
[truncated: 358 more columns]

## Sheet: CPO
Inhibition at 300 µM Ciclopirox olamine
	0	5	10	15	20	25	30	35	40	45	50	55	60	65	70	75	80	85	90	95	100	105	110	115	120	125	130	135	140	145	150	155	160	165	170	175	180	185	190	195	200	205	210	215	220	225	230	235	240
Control (1)	0.0619167	0.0624167	0.06325	0.0649167	0.0659167	0.06675	0.0676667	0.0691667	0.0696667	0.0710833	0.0716667	0.07225	0.0728333	0.0749167	0.0753333	0.0755	0.078	0.07725	0.078	0.0796667	0.0808333	0.0800833	0.0815833	0.082	0.0828333	0.0834167	0.0841667	0.0846667	0.0850833	0.0860833	0.0869167	0.08675	0.08775	0.0874167	0.0889167	0.08875
CPO (1)	0.056	0.056	0.056	0.056	0.057	0.056	0.057	0.058	0.056	0.057	0.059	0.058	0.06	0.059	0.058	0.061	0.06	0.06	0.059	0.059	0.061	0.062	0.059	0.06	0.064	0.062	0.063	0.062	0.063	0.065	0.063	0.063	0.062	0.063	0.062	0.062	0.063	0.063	0.066	0.065	0.066	0.066	0.068	0.065	0.067	0.067	0.067	0.066	0.068
CPO (2)	0.057	0.056	0.059	0.056	0.057	0.057	0.056	0.058	0.058	0.058	0.058	0.058	0.058	0.059	0.06	0.059	0.06	0.059	0.059	0.059	0.061	0.059	0.061	0.06	0.062	0.061	0.062	0.063	0.064	0.063	0.064	0.064	0.063	0.064	0.063	0.065	0.064	0.065	0.066	0.066	0.068	0.066	0.067	0.067	0.067	0.067	0.067	0.067	0.067
CPO (3)	0.055	0.058	0.055	0.057	0.056	0.059	0.057	0.059	0.059	0.06	0.057	0.059	0.062	0.064	0.064	0.065	0.06	0.067	0.065	0.065	0.067	0.065	0.066	0.067	0.067	0.066	0.067	0.066	0.069	0.068	0.064	0.067	0.069	0.065	0.067	0.069	0.07	0.07	0.068	0.07	0.073	0.068	0.07	0.071	0.072	0.071	0.072	0.071	0.072
	Average A420 increase/sec
	Rep 1	Rep 2	Rep 3	% of Control Rate Rep 1	% of Control Rate Rep 2	% of Control Rate Rep 3	Average %	% Inhibition	% StDev
Control	0.00015675	0.00015675	0.00015675	100	100	100	100	0	0
CPO	8.7e-05	4.6e-05	5.4e-05	55.5024	29.3461	34.4498	39.7661	60.2339	13.8649
IC50 Kinetic Assay Calculation:
Time	0	5	10	15	20	25	30	35	40	45	50	55	60	65	70	75	80	85	90	95	100	105	110	115	120	125	130	135	140	145	150	155	160	165	170	175	180	185	190	195	200	205	210	215	220	225	230	235	240
0 µM 1	0.069	0.068	0.069	0.068	0.068	0.068	0.07	0.07	0.068	0.069	0.071	0.075	0.076	0.075	0.075	0.079	0.076	0.078	0.079	0.079	0.08	0.079	0.083	0.083	0.084	0.083	0.084	0.086	0.087	0.086	0.089	0.086	0.086	0.089	0.091	0.088	0.091	0.091	0.09	0.093	0.091	0.092	0.093	0.093	0.094	0.096	0.094	0.097	0.094
0 µM 2	0.069	0.07	0.069	0.069	0.072	0.072	0.071	0.074	0.074	0.075	0.076	0.078	0.078	0.081	0.079	0.08	0.082	0.084	0.082	0.083	0.085	0.084	0.088	0.086	0.089	0.088	0.088	0.092	0.09	0.091	0.093	0.093	0.092	0.094	0.093	0.096	0.095	0.097	0.096	0.096	0.096	0.097	0.095	0.097	0.097	0.094	0.097	0.097	0.097
0 µM 3	0.071	0.07	0.069	0.069	0.069	0.072	0.073	0.075	0.074	0.075	0.075	0.077	0.078	0.078	0.079	0.079	0.082	0.082	0.083	0.085	0.083	0.086	0.087	0.086	0.087	0.088	0.088	0.089	0.09	0.09	0.093	0.091	0.094	0.095	0.094	0.093	0.095	0.096	0.097	0.095	0.096	0.098	0.097	0.096	0.097	0.097	0.097	0.097	0.097
10 µM 1	0.059	0.056	0.06	0.06	0.061	0.061	0.06	0.063	0.063	0.063	0.063	0.065	0.066	0.065	0.064	0.066	0.065	0.067	0.067	0.069	0.068	0.069	0.072	0.07	0.07	0.07	0.069	0.072	0.072	0.073	0.072	0.074	0.072	0.073	0.073	0.073	0.074	0.074	0.075	0.074	0.075	0.077	0.076	0.077	0.078	0.077	0.079	0.08	0.078
10 µM 2	0.062	0.058	0.06	0.057	0.062	0.06	0.062	0.064	0.063	0.065	0.065	0.065	0.067	0.066	0.065	0.067	0.068	0.067	0.068	0.07	0.071	0.07	0.072	0.07	0.072	0.072	0.072	0.074	0.073	0.073	0.073	0.075	0.074	0.074	0.075	0.076	0.076	0.077	0.077	0.076	0.079	0.076	0.077	0.077	0.079	0.08	0.08	0.08	0.078
10 µM 3	0.062	0.063	0.062	0.063	0.062	0.064	0.064	0.068	0.066	0.065	0.066	0.068	0.069	0.068	0.07	0.071	0.07	0.069	0.071	0.071	0.073	0.073	0.077	0.074	0.073	0.075	0.074	0.076	0.075	0.076	0.078	0.08	0.076	0.079	0.079	0.077	0.079	0.079	0.078	0.081	0.082	0.08	0.083	0.08	0.082	0.083	0.082	0.084	0.083
25 µM 1	0.06	0.061	0.062	0.064	0.064	0.064	0.064	0.064	0.065	0.066	0.066	0.067	0.068	0.07	0.07	0.069	0.07	0.072	0.071	0.072	0.074	0.073	0.073	0.072	0.073	0.072	0.075	0.074	0.076	0.077	0.074	0.076	0.076	0.075	0.077	0.078	0.078	0.078	0.078	0.078	0.079	0.08	0.08	0.081	0.081	0.08	0.083	0.083	0.083
25 µM 2	0.065	0.06	0.063	0.061	0.061	0.062	0.063	0.064	0.065	0.065	0.067	0.067	0.067	0.065	0.066	0.067	0.069	0.067	0.067	0.069	0.071	0.07	0.07	0.073	0.07	0.072	0.071	0.073	0.075	0.075	0.074	0.074	0.074	0.076	0.074	0.076	0.077	0.076	0.077	0.077	0.076	0.078	0.079	0.08	0.08	0.078	0.08	0.078	0.082
25 µM 3	0.062	0.061	0.061	0.063	0.064	0.063	0.064	0.064	0.066	0.067	0.066	0.068	0.07	0.067	0.068	0.07	0.07	0.069	0.071	0.069	0.07	0.071	0.073	0.073	0.074	0.073	0.074	0.075	0.075	0.076	0.077	0.077	0.078	0.078	0.078	0.079	0.079	0.078	0.08	0.079	0.081	0.081	0.079	0.082	0.082	0.082	0.082	0.081	0.082
50 µM 1	0.063	0.065	0.06	0.062	0.063	0.06	0.06	0.062	0.064	0.062	0.064	0.064	0.066	0.066	0.067	0.066	0.067	0.067	0.069	0.07	0.072	0.069	0.07	0.071	0.071	0.071	0.07	0.072	0.07	0.073	0.075	0.074	0.073	0.074	0.075	0.075	0.077	0.076	0.075	0.077	0.076	0.077	0.077	0.077	0.078	0.079	0.078	0.078	0.078
50 µM 2	0.057	0.058	0.059	0.06	0.062	0.063	0.063	0.063	0.064	0.075	0.064	0.064	0.075	0.065	0.066	0.077	0.067	0.068	0.07	0.071	0.071	0.071	0.072	0.074	0.07	0.072	0.073	0.071	0.074	0.071	0.074	0.074	0.075	0.074	0.073	0.075	0.074	0.077	0.078	0.077	0.076	0.08	0.077	0.079	0.076	0.078	0.078	0.079	0.077
50 µM 3	0.061	0.059	0.059	0.059	0.061	0.061	0.062	0.062	0.063	0.066	0.066	0.064	0.066	0.065	0.067	0.068	0.066	0.067	0.069	0.068	0.068	0.069	0.07	0.07	0.071	0.071	0.072	0.072	0.074	0.071	0.073	0.073	0.073	0.073	0.073	0.073	0.074	0.075	0.074	0.075	0.077	0.077	0.076	0.075	0.077	0.077	0.078	0.077	0.078
100 µM 1	0.056	0.056	0.057	0.057	0.058	0.058	0.06	0.061	0.06	0.06	0.06	0.062	0.063	0.063	0.062	0.064	0.064	0.061	0.064	0.065	0.066	0.066	0.066	0.066	0.066	0.067	0.069	0.067	0.069	0.066	0.067	0.066	0.066	0.069	0.069	0.07	0.07	0.071	0.07	0.07	0.072	0.072	0.071	0.072	0.071	0.073	0.072	0.072	0.075
100 µM 2	0.057	0.058	0.059	0.059	0.059	0.06	0.061	0.063	0.062	0.063	0.06	0.065	0.065	0.068	0.067	0.067	0.068	0.067	0.067	0.069	0.069	0.07	0.07	0.072	0.07	0.071	0.07	0.072	0.07	0.071	0.075	0.074	0.073	0.073	0.072	0.074	0.075	0.073	0.076	0.075	0.077	0.074	0.077	0.075	0.077	0.075	0.075	0.075	0.077
100 µM 3	0.056	0.054	0.058	0.058	0.058	0.057	0.061	0.058	0.059	0.061	0.062	0.062	0.063	0.062	0.06	0.065	0.063	0.066	0.064	0.064	0.065	0.066	0.067	0.066	0.067	0.067	0.066	0.068	0.068	0.068	0.068	0.067	0.07	0.07	0.069	0.069	0.071	0.07	0.072	0.072	0.071	0.071	0.071	0.077	0.074	0.073	0.073	0.074	0.073
150 µM 1	0.062	0.063	0.06	0.062	0.061	0.062	0.063	0.061	0.065	0.062	0.065	0.063	0.065	0.064	0.068	0.067	0.063	0.066	0.067	0.068	0.067	0.068	0.07	0.068	0.07	0.07	0.068	0.069	0.07	0.072	0.07	0.07	0.071	0.071	0.073	0.074	0.071	0.072	0.073	0.074	0.072	0.073	0.074	0.074	0.073	0.073	0.075	0.073	0.075
150 µM 2	0.059	0.059	0.061	0.061	0.062	0.062	0.062	0.064	0.065	0.064	0.063	0.066	0.066	0.068	0.067	0.069	0.066	0.067	0.069	0.067	0.071	0.069	0.07	0.07	0.071	0.072	0.072	0.071	0.073	0.071	0.071	0.071	0.073	0.074	0.072	0.073	0.074	0.074	0.075	0.075	0.075	0.075	0.075	0.076	0.075	0.078	0.076	0.077	0.078
150 µM 3	0.062	0.063	0.063	0.066	0.065	0.066	0.066	0.063	0.068	0.062	0.064	0.064	0.066	0.065	0.066	0.067	0.068	0.068	0.068	0.069	0.069	0.069	0.069	0.069	0.071	0.071	0.071	0.07	0.071	0.071	0.072	0.069	0.073	0.074	0.076	0.078	0.076	0.076	0.076	0.076	0.073	0.074	0.075	0.077	0.076	0.075	0.077	0.077	0.076
200 µM 1	0.06	0.061	0.059	0.061	0.06	0.062	0.064	0.064	0.064	0.064	0.066	0.066	0.065	0.066	0.067	0.067	0.067	0.068	0.068	0.068	0.071	0.069	0.07	0.07	0.068	0.071	0.071	0.07	0.071	0.071	0.073	0.071	0.072	0.072	0.073	0.072	0.074	0.075	0.073	0.075	0.075	0.075	0.075	0.075	0.073	0.076	0.075	0.075	0.076
200 µM 2	0.061	0.062	0.064	0.064	0.062	0.064	0.065	0.066	0.068	0.071	0.07	0.07	0.069	0.072	0.07	0.068	0.07	0.069	0.07	0.07	0.07	0.071	0.073	0.071	0.071	0.072	0.072	0.073	0.072	0.072	0.072	0.074	0.077	0.075	0.076	0.079	0.076	0.075	0.077	0.077	0.078	0.077	0.077	0.077	0.079	0.078	0.079	0.078	0.077
200 µM 3	0.058	0.058	0.059	0.06	0.059	0.078	0.094	0.092	0.095	0.101	0.097	0.099	0.098	0.094	0.097	0.1	0.102	0.102	0.103	0.104	0.101	0.105	0.104	0.106	0.105	0.105	0.105	0.105	0.105	0.108	0.108	0.115	0.117	0.116	0.112	0.112	0.112	0.113	0.112	0.111	0.112	0.113	0.114	0.112	0.11	0.113	0.113	0.115	0.113
300 µM 1	0.067	0.064	0.068	0.065	0.065	0.066	0.066	0.067	0.068	0.067	0.068	0.07	0.069	0.068	0.069	0.069	0.073	0.07	0.072	0.072	0.072	0.073	0.074	0.073	0.071	0.073	0.071	0.071	0.071	0.073	0.073	0.074	0.074	0.073	0.074	0.073	0.074	0.074	0.078	0.075	0.077	0.075	0.074	0.076	0.076	0.075	0.076	0.077	0.077
300 µM 2	0.063	0.062	0.061	0.06	0.059	0.06	0.061	0.059	0.06	0.062	0.061	0.061	0.063	0.063	0.063	0.065	0.064	0.064	0.064	0.065	0.064	0.065	0.067	0.067	0.065	0.065	0.067	0.067	0.068	0.066	0.067	0.068	0.07	0.067	0.068	0.068	0.067	0.07	0.07	0.069	0.07	0.068	0.071	0.069	0.07	0.071	0.071	0.071	0.071
300 µM 3	0.06	0.059	0.06	0.059	0.06	0.059	0.059	0.06	0.06	0.06	0.06	0.062	0.061	0.062	0.062	0.061	0.064	0.062	0.063	0.064	0.064	0.063	0.066	0.065	0.063	0.065	0.065	0.066	0.066	0.066	0.066	0.068	0.067	0.068	0.067	0.07	0.068	0.069	0.068	0.067	0.072	0.068	0.066	0.07	0.07	0.069	0.069	0.069	0.069
																		0.000154
																		0.000143
																		0.000156
																		0.000108
																		9.3e-05
																		9.2e-05
																		8.6e-05
																		8.8e-05
																		9.3e-05
																		7.9e-05
																		9.3e-05
																		9.1e-05
																		6.6e-05
																		6.6e-05
										7.1e-05
										6.9e-05
										7.2e-05
										3.4e-05
										6.5e-05
										4.5e-05
										5.9e-05
										5.6e-05
	CPO conc (µM)	Rep 1 Rate	Rep 2 Rate	Rep 3 Rate	% of 0uM Rep 1	% of 0uM Rep 2	% of 0uM Rep 3	Average % of 0uM	SD
	0	0.000154	0.000143	0.000156	100	100	100	100	0
	25	0.000108	9.3e-05	9.2e-05	70.1299	65.035	58.9744	64.7131	5.58472
	50	8.6e-05	8.8e-05	9.3e-05	55.8442	61.5385	59.6154	58.9993	2.89671
	100		7.9e-05	9.3e-05		55.2448	59.6154	57.4301	3.0905
	150	9.1e-05	6.6e-05	6.6e-05	59.0909	46.1538	42.3077	49.1841	8.79239
	200	7.1e-05	6.9e-05	7.2e-05	46.1039	48.2517	46.1538	46.8365	1.2259
	250	3.4e-05	6.5e-05	5.6e-05	22.0779	45.4545	35.8974	34.4766	11.7529
	300	4.5e-05	5.9e-05	5.6e-05	29.2208	41.2587	35.8974	35.459	6.03095
Metronidazole Kinetics
TIME	18	19	20	21	22	23	24	25	26	27	28	29	30	31	32	33	34	35	36	37	38	39	40	41	42	43	44	45	46	47	48	49	50	51	52	53	54	55	56	57	58	59	60	61	62	63	64	65	66
300 ↨M CPO	0.385	0.384	0.384	0.384	0.384	0.384	0.384	0.384	0.383	0.384	0.384	0.384	0.383	0.384	0.383	0.383	0.383	0.383	0.384	0.383	0.383	0.383	0.382	0.383	0.382	0.383	0.383	0.383	0.382	0.382	0.382	0.383	0.383	0.383	0.383	0.382	0.383	0.383	0.382	0.382	0.382	0.383	0.383	0.383	0.383	0.383	0.382	0.382	0.382
TIME	19	20	21	22	23	24	25	26	27	28	29	30	31	32	33	34	35	36	37	38	39	40	41	42	43	44	45	46	47	48	49	50	51	52	53	54	55	56	57	58	59	60	61	62	63	64	65	66	67
Control	0.373	0.371	0.371	0.37	0.371	0.37	0.37	0.371	0.371	0.371	0.371	0.371	0.37	0.37	0.37	0.37	0.37	0.369	0.369	0.369	0.368	0.369	0.368	0.369	0.369	0.369	0.369	0.369	0.369	0.368	0.368	0.368	0.368	0.368	0.368	0.367	0.367	0.368	0.367	0.367	0.367	0.367	0.367	0.366	0.366	0.366	0.365	0.366	0.365
																	% activity vs Control
																	35.0282
[truncated: 215 more columns]

## Sheet: CAL
Inhibition at 300 µM Calcimycin
	0	5	10	15	20	25	30	35	40	45	50	55	60	65	70	75	80	85	90	95	100	105	110	115	120	125	130	135	140	145	150	155	160	165	170	175	180	185	190	195	200	205	210	215	220	225	230	235	240
Control (1)	0.058	0.057	0.059	0.06	0.059	0.06	0.064	0.064	0.063	0.065	0.065	0.066	0.067	0.066	0.066	0.067	0.07	0.07	0.07	0.072	0.072	0.071	0.073	0.073	0.073	0.076	0.075	0.075	0.078	0.076	0.078	0.08	0.078	0.079	0.081	0.079	0.081	0.081	0.081	0.083	0.083	0.082	0.082	0.084	0.082	0.084	0.084	0.087	0.087
Control (2)	0.053	0.054	0.055	0.056	0.057	0.056	0.058	0.06	0.059	0.059	0.062	0.059	0.06	0.062	0.061	0.061	0.065	0.063	0.063	0.065	0.066	0.065	0.065	0.065	0.067	0.069	0.07	0.067	0.069	0.069	0.07	0.068	0.07	0.072	0.072	0.072	0.071	0.071	0.073	0.073	0.071	0.072	0.074	0.074	0.074	0.073	0.075	0.076	0.074
Control (3)	0.056	0.058	0.057	0.057	0.059	0.06	0.062	0.061	0.064	0.065	0.064	0.066	0.064	0.068	0.067	0.067	0.067	0.069	0.068	0.07	0.071	0.071	0.074	0.073	0.074	0.074	0.074	0.075	0.073	0.074	0.076	0.077	0.076	0.075	0.079	0.079	0.079	0.08	0.079	0.08	0.082	0.08	0.081	0.082	0.083	0.085	0.082	0.084	0.083
CAL (1)	0.282	0.282	0.281	0.289	0.279	0.283	0.295	0.28	0.281	0.289	0.284	0.284	0.28	0.283	0.28	0.285	0.282	0.282	0.282	0.283	0.288	0.284	0.285	0.281	0.283	0.284	0.287	0.297	0.287	0.286	0.284	0.298	0.294	0.29	0.286	0.29	0.289	0.286	0.289	0.287	0.29	0.289	0.291	0.291	0.307	0.289	0.29	0.289	0.292
CAL (2)	0.33	0.293	0.299	0.286	0.302	0.286	0.287	0.286	0.291	0.286	0.287	0.29	0.287	0.289	0.288	0.309	0.292	0.288	0.296	0.29	0.289	0.29	0.29	0.291	0.294	0.292	0.291	0.294	0.293	0.298	0.298	0.295	0.294	0.299	0.295	0.297	0.294	0.296	0.295	0.303	0.297	0.298	0.299	0.299	0.301	0.298	0.299	0.297	0.301
CAL (3)	0.317	0.313	0.315	0.316	0.313	0.313	0.314	0.312	0.31	0.314	0.312	0.311	0.312	0.311	0.324	0.311	0.312	0.312	0.312	0.317	0.319	0.315	0.314	0.319	0.312	0.315	0.314	0.312	0.313	0.313	0.313	0.331	0.313	0.313	0.323	0.315	0.322	0.315	0.323	0.317	0.316	0.335	0.316	0.316	0.317	0.318	0.317	0.317	0.319
	Average A420 increase/sec
	Rep 1	Rep 2	Rep 3	% of Control Rate Rep 1	% of Control Rate Rep 2	% of Control Rate Rep 3	Average %	% Inhibition	% StDev
Control	0.000124	0.000131	0.0001	100	100	100	100	0	0
CAL	4.5e-05	4.5e-05	2.6e-05	38.0282	38.0282	21.9718	32.6761	67.3239	9.27013
IC50 Kinetic Assay Calculation:
Time(sec)	0	5	10	15	20	25	30	35	40	45	50	55	60	65	70	75	80	85	90	95	100	105	110	115	120	125	130	135	140	145	150	155	160	165	170	175	180	185	190	195	200	205	210	215	220	225	230	235	240
0 µM 1	0.067	0.07	0.07	0.073	0.071	0.073	0.076	0.076	0.077	0.081	0.08	0.082	0.082	0.086	0.084	0.086	0.088	0.088	0.089	0.09	0.093	0.092	0.093	0.095	0.095	0.096	0.096	0.095	0.094	0.095	0.095	0.095	0.094	0.095	0.094	0.095	0.095	0.096	0.096	0.095	0.096	0.097	0.095	0.096	0.095	0.095	0.097	0.097	0.096
0 µM 2	0.072	0.071	0.074	0.074	0.075	0.077	0.076	0.077	0.077	0.079	0.082	0.082	0.082	0.084	0.086	0.087	0.088	0.089	0.091	0.089	0.093	0.093	0.094	0.096	0.097	0.097	0.094	0.096	0.097	0.097	0.098	0.098	0.096	0.098	0.098	0.098	0.096	0.097	0.097	0.097	0.098	0.098	0.098	0.098	0.096	0.097	0.098	0.097	0.098
0 µM 3	0.071	0.071	0.07	0.07	0.072	0.074	0.075	0.075	0.078	0.078	0.08	0.08	0.081	0.082	0.083	0.085	0.084	0.088	0.088	0.089	0.089	0.089	0.09	0.093	0.092	0.094	0.095	0.096	0.096	0.095	0.096	0.096	0.097	0.094	0.094	0.094	0.098	0.095	0.096	0.096	0.095	0.097	0.096	0.097	0.095	0.097	0.096	0.096	0.097
10 µM 1	0.07	0.068	0.071	0.073	0.072	0.074	0.074	0.077	0.077	0.076	0.078	0.08	0.08	0.081	0.081	0.081	0.084	0.084	0.083	0.086	0.088	0.085	0.086	0.087	0.089	0.088	0.09	0.091	0.092	0.09	0.092	0.092	0.092	0.092	0.091	0.094	0.094	0.095	0.096	0.094	0.097	0.096	0.097	0.096	0.097	0.097	0.097	0.096	0.096
10 µM 2	0.068	0.069	0.07	0.071	0.07	0.074	0.075	0.076	0.076	0.077	0.079	0.08	0.079	0.08	0.084	0.082	0.085	0.084	0.084	0.085	0.087	0.087	0.088	0.091	0.089	0.091	0.089	0.092	0.092	0.091	0.092	0.091	0.091	0.093	0.095	0.094	0.094	0.094	0.095	0.095	0.096	0.096	0.095	0.097	0.099	0.095	0.096	0.098	0.095
10 µM 3	0.07	0.07	0.07	0.071	0.074	0.077	0.075	0.076	0.077	0.078	0.078	0.082	0.081	0.082	0.084	0.086	0.085	0.085	0.088	0.085	0.089	0.089	0.089	0.09	0.092	0.092	0.093	0.093	0.094	0.094	0.095	0.096	0.094	0.096	0.098	0.096	0.097	0.096	0.096	0.097	0.096	0.097	0.099	0.097	0.099	0.098	0.097	0.099	0.097
25 µM 1	0.066	0.066	0.071	0.069	0.071	0.072	0.073	0.073	0.075	0.076	0.077	0.079	0.081	0.084	0.081	0.081	0.081	0.081	0.084	0.084	0.085	0.085	0.084	0.087	0.087	0.087	0.087	0.088	0.087	0.09	0.09	0.09	0.092	0.091	0.092	0.092	0.094	0.092	0.092	0.094	0.094	0.094	0.092	0.094	0.094	0.094	0.095	0.095	0.094
25 µM 2	0.066	0.067	0.069	0.069	0.07	0.073	0.072	0.075	0.075	0.076	0.076	0.077	0.077	0.077	0.08	0.08	0.082	0.082	0.082	0.085	0.084	0.086	0.086	0.085	0.087	0.087	0.089	0.09	0.088	0.089	0.088	0.089	0.092	0.092	0.092	0.092	0.093	0.093	0.094	0.092	0.094	0.095	0.096	0.094	0.094	0.096	0.095	0.097	0.095
25 µM 3	0.068	0.07	0.068	0.07	0.072	0.074	0.074	0.077	0.076	0.077	0.076	0.079	0.079	0.078	0.08	0.084	0.082	0.084	0.084	0.084	0.084	0.087	0.088	0.088	0.086	0.091	0.089	0.092	0.09	0.089	0.09	0.093	0.092	0.092	0.093	0.094	0.093	0.094	0.094	0.094	0.094	0.096	0.094	0.095	0.096	0.094	0.094	0.096	0.096
50 µM 1	0.077	0.077	0.079	0.079	0.08	0.084	0.082	0.083	0.084	0.084	0.087	0.087	0.088	0.089	0.089	0.09	0.091	0.091	0.092	0.093	0.095	0.094	0.097	0.096	0.099	0.096	0.098	0.099	0.099	0.098	0.101	0.1	0.1	0.103	0.103	0.102	0.103	0.105	0.102	0.104	0.103	0.104	0.104	0.105	0.105	0.105	0.105	0.106	0.106
50 µM 2	0.075	0.077	0.079	0.078	0.08	0.082	0.083	0.083	0.084	0.088	0.086	0.086	0.088	0.09	0.09	0.09	0.09	0.093	0.092	0.095	0.092	0.094	0.095	0.096	0.096	0.096	0.096	0.099	0.098	0.101	0.099	0.101	0.101	0.101	0.102	0.103	0.103	0.104	0.105	0.103	0.107	0.104	0.106	0.105	0.105	0.104	0.106	0.106	0.106
50 µM 3	0.082	0.079	0.082	0.085	0.084	0.084	0.087	0.087	0.089	0.088	0.09	0.091	0.093	0.093	0.093	0.094	0.095	0.095	0.098	0.095	0.099	0.098	0.098	0.099	0.101	0.102	0.102	0.102	0.102	0.104	0.103	0.104	0.107	0.104	0.107	0.106	0.107	0.107	0.11	0.108	0.109	0.109	0.109	0.108	0.11	0.11	0.109	0.109	0.109
100 µM 1	0.1	0.101	0.102	0.102	0.104	0.103	0.104	0.106	0.106	0.108	0.106	0.108	0.109	0.112	0.111	0.11	0.113	0.113	0.115	0.114	0.115	0.118	0.115	0.117	0.118	0.118	0.119	0.118	0.121	0.118	0.121	0.119	0.121	0.123	0.124	0.123	0.122	0.124	0.125	0.124	0.126	0.127	0.126	0.128	0.127	0.128	0.129	0.127	0.126
100 µM 2	0.1	0.1	0.102	0.102	0.103	0.107	0.106	0.108	0.108	0.109	0.109	0.11	0.11	0.111	0.113	0.113	0.112	0.113	0.113	0.115	0.115	0.114	0.115	0.117	0.119	0.117	0.117	0.118	0.118	0.121	0.122	0.121	0.121	0.12	0.121	0.122	0.123	0.124	0.125	0.124	0.125	0.126	0.125	0.125	0.125	0.126	0.126	0.126	0.129
100 µM 3	0.111	0.11	0.111	0.114	0.115	0.118	0.12	0.123	0.122	0.127	0.127	0.131	0.131	0.13	0.133	0.131	0.132	0.134	0.134	0.137	0.136	0.136	0.135	0.137	0.137	0.136	0.139	0.138	0.138	0.14	0.141	0.14	0.14	0.142	0.142	0.141	0.143	0.143	0.143	0.145	0.144	0.147	0.144	0.146	0.147	0.144	0.147	0.146	0.139
150 µM 1	0.145	0.143	0.144	0.146	0.146	0.149	0.147	0.155	0.151	0.149	0.151	0.154	0.152	0.152	0.154	0.154	0.154	0.157	0.157	0.159	0.158	0.16	0.158	0.16	0.161	0.162	0.163	0.165	0.161	0.164	0.163	0.162	0.166	0.168	0.165	0.168	0.165	0.173	0.175	0.174	0.174	0.176	0.177	0.175	0.176	0.175	0.178	0.177	0.176
150 µM 2	0.137	0.138	0.143	0.14	0.141	0.143	0.143	0.146	0.145	0.146	0.146	0.148	0.148	0.15	0.15	0.15	0.151	0.15	0.153	0.152	0.154	0.154	0.156	0.154	0.155	0.158	0.158	0.157	0.159	0.159	0.16	0.16	0.161	0.16	0.16	0.162	0.162	0.161	0.162	0.164	0.164	0.163	0.164	0.163	0.165	0.165	0.166	0.166	0.168
150 µM 3	0.161	0.16	0.163	0.163	0.165	0.166	0.166	0.167	0.169	0.167	0.169	0.17	0.17	0.173	0.172	0.174	0.173	0.174	0.174	0.165	0.164	0.167	0.166	0.169	0.167	0.168	0.17	0.17	0.17	0.172	0.171	0.171	0.173	0.172	0.174	0.175	0.174	0.172	0.176	0.179	0.176	0.176	0.176	0.177	0.178	0.179	0.178	0.179	0.178
200 µM 1	0.159	0.162	0.161	0.163	0.164	0.166	0.166	0.167	0.17	0.168	0.17	0.169	0.17	0.17	0.173	0.174	0.175	0.174	0.174	0.175	0.176	0.177	0.179	0.177	0.178	0.178	0.18	0.181	0.182	0.181	0.179	0.183	0.184	0.183	0.184	0.186	0.185	0.184	0.184	0.186	0.187	0.187	0.185	0.187	0.186	0.19	0.187	0.188	0.187
200 µM 2	0.173	0.174	0.174	0.175	0.176	0.176	0.176	0.179	0.179	0.181	0.181	0.181	0.181	0.183	0.184	0.184	0.183	0.188	0.185	0.186	0.186	0.188	0.188	0.191	0.188	0.191	0.192	0.19	0.191	0.191	0.191	0.193	0.192	0.194	0.195	0.196	0.197	0.194	0.196	0.196	0.197	0.2	0.195	0.197	0.198	0.198	0.196	0.198	0.199
200 µM 3	0.176	0.177	0.177	0.178	0.179	0.181	0.182	0.183	0.184	0.184	0.186	0.188	0.188	0.186	0.188	0.189	0.189	0.188	0.19	0.191	0.191	0.193	0.191	0.192	0.193	0.194	0.194	0.197	0.195	0.197	0.197	0.196	0.197	0.198	0.199	0.199	0.198	0.2	0.201	0.201	0.201	0.201	0.201	0.201	0.203	0.203	0.203	0.204	0.203
300 µM 1	0.263	0.265	0.265	0.265	0.264	0.266	0.268	0.268	0.271	0.268	0.27	0.271	0.271	0.271	0.271	0.273	0.273	0.272	0.274	0.276	0.275	0.274	0.276	0.275	0.276	0.278	0.28	0.256	0.257	0.256	0.258	0.259	0.259	0.26	0.261	0.262	0.258	0.26	0.259	0.261	0.26	0.262	0.261	0.264	0.262	0.264	0.263	0.264	0.264
300 µM 2	0.253	0.252	0.252	0.248	0.248	0.249	0.25	0.253	0.253	0.254	0.252	0.253	0.254	0.254	0.257	0.255	0.258	0.255	0.258	0.257	0.258	0.262	0.259	0.261	0.262	0.259	0.259	0.262	0.263	0.263	0.264	0.264	0.264	0.264	0.266	0.266	0.267	0.266	0.268	0.267	0.268	0.268	0.267	0.269	0.271	0.269	0.274	0.271	0.272
300 µM 3	0.243	0.243	0.247	0.246	0.245	0.248	0.257	0.25	0.25	0.25	0.25	0.25	0.254	0.252	0.253	0.256	0.254	0.256	0.255	0.258	0.259	0.26	0.259	0.256	0.26	0.261	0.265	0.26	0.263	0.266	0.263	0.261	0.262	0.264	0.265	0.267	0.268	0.268	0.268	0.269	0.268	0.268	0.266	0.267	0.267	0.268	0.269	0.269	0.272
																																Change in Abs
																															Rep 1	0.000212
																															Rep 2	0.000201
																															Rep 3	0.000212
																																Change in Abs
																															Rep 1	0.000188
																															Rep 2	0.000188
																															Rep 3	0.000188
																																Change in Abs
																															Rep 1	0.000176
																															Rep 2	0.000173
																															Rep 3	0.000173
																																Change in Abs
																															Rep 1	0.000169
																															Rep 2	0.000174
																															Rep 3	0.000169
																																Change in Abs
																															Rep 1	0.000157
																															Rep 2	0.000143
																															Rep 3
																																Change in Abs
																															Rep 1	0.000141
																															Rep 2	0.000141
																															Rep 3
																																Change in Abs
																															Rep 1	0.000136
																															Rep 2	0.000136
																															Rep 3
																																Change in Abs
																															Rep 1	0.000122
																															Rep 2	9.6e-05
																															Rep 3	9.3e-05
Time(sec)	0	5	10	15	20	25	30	35	40	45	50	55	60	65	70	75	80	85	90	95	100	105	110	115	120	125	130	135	140	145	150	155	160	165	170	175	180	185	190	195	200	205	210	215	220	225	230	235	240
0 1	0.053	0.053	0.055	0.056	0.057	0.056	0.057	0.057	0.058	0.058	0.062	0.059	0.059	0.058	0.062	0.061	0.061	0.061	0.062	0.063	0.065	0.064	0.064	0.065	0.066	0.064	0.067	0.066	0.067	0.067	0.065	0.068	0.067	0.068	0.069	0.067	0.071	0.069	0.068	0.07	0.07	0.07	0.069	0.069	0.072	0.07	0.069	0.072	0.072
0 2	0.059	0.062	0.062	0.063	0.065	0.064	0.065	0.067	0.067	0.067	0.068	0.069	0.071	0.071	0.072	0.074	0.074	0.074	0.076	0.077	0.076	0.078	0.079	0.079	0.083	0.082	0.08	0.083	0.082	0.084	0.084	0.086	0.086	0.083	0.086	0.087	0.088	0.087	0.089	0.089	0.089	0.091	0.09	0.092	0.091	0.092	0.092	0.091	0.093
0 3	0.062	0.065	0.065	0.064	0.069	0.069	0.07	0.071	0.073	0.073	0.074	0.074	0.076	0.075	0.076	0.08	0.078	0.081	0.081	0.082	0.082	0.083	0.084	0.085	0.084	0.086	0.087	0.088	0.088	0.09	0.089	0.09	0.089	0.091	0.093	0.091	0.093	0.093	0.094	0.095	0.095	0.096	0.097	0.095	0.097	0.098	0.099	0.099	0.099
350 1	0.371	0.371	0.375	0.404	0.377	0.384	0.398	0.381	0.378	0.422	0.394	0.383	0.38	0.391	0.388	0.395	0.384	0.395	0.386	0.407	0.382	0.384	0.386	0.386	0.403	0.401	0.394	0.397	0.412	0.396	0.414	0.392	0.395	0.414	0.4	0.408	0.396	0.401	0.408	0.401	0.405	0.406	0.396	0.402	0.402	0.408	0.398	0.404	0.403
350 2	0.43	0.43	0.424	0.422	0.436	0.435	0.424	0.426	0.481	0.43	0.445	0.43	0.446	0.438	0.434	0.437	0.436	0.459	0.441	0.442	0.445	0.437	0.44	0.449	0.442	0.439	0.448	0.437	0.439	0.438	0.441	0.441	0.438	0.442	0.439	0.444	0.443	0.439	0.438	0.44	0.449	0.442	0.44	0.46	0.446	0.444	0.438	0.44	0.415
350 3	0.393	0.453	0.391	0.422	0.392	0.407	0.406	0.43	0.404	0.395	0.392	0.414	0.41	0.397	0.444	0.402	0.403	0.403	0.403	0.418	0.404	0.4	0.403	0.403	0.404	0.42	0.406	0.411	0.391	0.396	0.401	0.393	0.395	0.398	0.393	0.397	0.399	0.403	0.401	0.399	0.399	0.404	0.404	0.4	0.404	0.398	0.405	0.401	0.403
CAL conc (µM)	Rep 1 Rate	Rep 2 Rate	Rep 3 Rate	% of 0uM Rep 1	% of 0uM Rep 2	% of 0uM Rep 3	Average % of 0uM	SD
0	0.000212	0.000201	0.000212	100	100	100	100	0
25	0.000188	0.000188	0.000188	90.24	90.24	90.24	90.24	1.74047e-14
50	0.000176	0.000173	0.000173	84.48	83.04	83.04	83.52	0.831384
100	0.000169	0.000174	0.000169	81.12	83.52	81.12	81.92	1.38564		IC50 = 335.03
150	0.000153	0.000139	0.000146	73.44	66.72	70.08	70.08	3.36
200	0.000141	0.000141	0.000141	67.68	67.68	67.68	67.68	0
250	0.000136	0.000136		65.28	65.28	0	65.28	0
300	0.000122	9.6e-05	9.3e-05	58.56	46.08	44.64	49.76	7.65496
Metronidazole Kinetics
TIME	18	19	20	21	22	23	24	25	26	27	28	29	30	31	32	33	34	35	36	37	38	39	40	41	42	43	44	45	46	47	48	49	50	51	52	53	54	55	56	57	58	59	60	61	62	63	64	65	66
300uM CAL	0.531	0.53	0.53	0.53	0.529	0.53	0.531	0.531	0.531	0.531	0.529	0.529	0.53	0.53	0.529	0.529	0.53	0.529	0.529	0.528	0.53	0.529	0.529	0.528	0.529	0.53	0.529	0.528	0.529	0.528	0.529	0.528	0.529	0.528	0.529	0.528	0.527	0.528	0.528	0.528	0.528	0.528	0.528	0.527	0.528	0.527	0.528	0.528	0.527
TIME	26	27	28	29	30	31	32	33	34	35	36	37	38	39	40	41	42	43	44	45	46	47	48	49	50	51	52	53	54	55	56	57	58	59	60	61	62	63	64	65	66	67	68	69	70	71	72	73	74
CONTROL	0.403	0.403	0.403	0.402	0.403	0.402	0.402	0.402	0.401	0.401	0.402	0.401	0.401	0.401	0.4	0.401	0.4	0.401	0.401	0.4	0.401	0.399	0.399	0.4	0.399	0.398	0.399	0.398	0.398	0.397	0.397	0.396	0.397	0.397	0.397	0.397	0.397	0.396	0.396	0.395	0.395	0.396	0.395	0.395	0.395	0.395	0.395	0.394	0.394
																		% activity vs Control
																		44.4444
[truncated: 301 more columns]

## Sheet: DHA
Inhibition at 300 µM Dihydroartemisinin
	0	5	10	15	20	25	30	35	40	45	50	55	60	65	70	75	80	85	90	95	100	105	110	115	120	125	130	135	140	145	150	155	160	165	170	175	180	185	190	195	200	205	210	215	220	225	230	235	240
Control (1)	0.0619167	0.0624167	0.06325	0.0649167	0.0659167	0.06675	0.0676667	0.0691667	0.0696667	0.0710833	0.0716667	0.07225	0.0728333	0.0749167	0.0753333	0.0755	0.078	0.07725	0.078	0.0796667	0.0808333	0.0800833	0.0815833	0.082	0.0828333	0.0834167	0.0841667	0.0846667	0.0850833	0.0860833	0.0869167	0.08675	0.08775	0.0874167	0.0889167	0.08875
DHA (1)	0.065	0.067	0.067	0.072	0.068	0.073	0.071	0.075	0.079	0.076	0.074	0.076	0.076	0.081	0.081	0.078	0.082	0.084	0.084	0.083	0.08	0.083	0.088	0.085	0.09	0.085	0.084	0.089	0.089	0.09	0.09	0.091	0.094	0.093	0.101	0.095	0.093	0.095	0.096	0.096	0.095	0.097	0.095	0.094	0.093	0.098	0.095	0.096	0.096
DHA (2)	0.067	0.068	0.073	0.069	0.072	0.07	0.073	0.075	0.075	0.094	0.079	0.079	0.085	0.083	0.084	0.087	0.085	0.086	0.088	0.09	0.087	0.09	0.089	0.095	0.089	0.091	0.091	0.096	0.097	0.094	0.097	0.097	0.1	0.1	0.097	0.099	0.097	0.098	0.098	0.097	0.1	0.098	0.102	0.1	0.097	0.097	0.103	0.097	0.101
DHA (3)	0.061	0.062	0.067	0.065	0.068	0.067	0.068	0.069	0.071	0.07	0.075	0.074	0.077	0.076	0.083	0.079	0.078	0.08	0.08	0.08	0.084	0.086	0.088	0.085	0.087	0.089	0.091	0.086	0.085	0.089	0.09	0.095	0.094	0.09	0.091	0.092	0.093	0.094	0.095	0.094	0.094	0.093	0.091	0.096	0.097	0.094	0.095	0.095	0.096
	Average A420 increase/sec
	Rep 1	Rep 2	Rep 3	% of Control Rate Rep 1	% of Control Rate Rep 2	% of Control Rate Rep 3	Average %	% Inhibition	% StDev
Control	0.000157	0	0.00015675	100	100	100	100	0	0
DHA	0.00021	0.00022	0.00018	133.971	140.351	114.833	129.718	0	13.2802
[truncated: 215 more columns]

## Sheet: ZPT
Inhibition at 300 µM Pyrithione zinc
	0	5	10	15	20	25	30	35	40	45	50	55	60	65	70	75	80	85	90	95	100	105	110	115	120	125	130	135	140	145	150	155	160	165	170	175	180	185	190	195	200	205	210	215	220	225	230	235	240
Control (1)	0.0619167	0.0624167	0.06325	0.0649167	0.0659167	0.06675	0.0676667	0.0691667	0.0696667	0.0710833	0.0716667	0.07225	0.0728333	0.0749167	0.0753333	0.0755	0.078	0.07725	0.078	0.0796667	0.0808333	0.0800833	0.0815833	0.082	0.0828333	0.0834167	0.0841667	0.0846667	0.0850833	0.0860833	0.0869167	0.08675	0.08775	0.0874167	0.0889167	0.08875	0.077
ZPT (1)	0.089	0.088	0.092	0.092	0.092	0.093	0.093	0.094	0.096	0.095	0.097	0.097	0.097	0.098	0.1	0.101	0.1	0.104	0.104	0.105	0.107	0.105	0.108	0.107	0.107	0.107	0.111	0.11	0.112	0.111	0.113	0.114	0.112	0.112	0.115	0.112	0.116	0.116	0.115	0.116	0.117	0.118	0.119	0.116	0.119	0.12	0.121	0.117	0.119
ZPT (2)	0.08	0.084	0.085	0.086	0.086	0.087	0.088	0.088	0.09	0.092	0.093	0.093	0.094	0.096	0.096	0.097	0.097	0.099	0.099	0.099	0.101	0.1	0.102	0.102	0.103	0.103	0.103	0.104	0.107	0.104	0.107	0.109	0.108	0.109	0.11	0.11	0.111	0.112	0.112	0.113	0.11	0.115	0.114	0.115	0.114	0.113	0.114	0.114	0.115
ZPT (3)	0.099	0.103	0.101	0.103	0.103	0.105	0.105	0.106	0.107	0.107	0.108	0.108	0.109	0.109	0.111	0.112	0.114	0.115	0.115	0.117	0.117	0.118	0.119	0.122	0.122	0.123	0.125	0.125	0.126	0.123	0.123	0.126	0.125	0.126	0.128	0.128	0.128	0.13	0.129	0.128	0.128	0.129	0.132	0.132	0.129	0.128	0.129	0.128	0.132
	Average A420 increase/sec
	Rep 1	Rep 2	Rep 3	% of Control Rate Rep 1	% of Control Rate Rep 2	% of Control Rate Rep 3	Average %	% Inhibition	% StDev
Control	0.00015675	0.00015675	0.00015675	100	100	100	100	0	0
ZPT	0.0002	0.000161	0.000161	127.592	102.711	102.711	111.005	0	14.3647
[truncated: 216 more columns]

## Sheet: SUL
Inhibition at 300 µM Sulindac
																																		Increase in A420/sec
																																	Rep 1	8.2e-05
																																	Rep 2	8.9e-05
																																	Rep 3	8.9e-05
	0	5	10	15	20	25	30	35	40	45	50	55	60	65	70	75	80	85	90	95	100	105	110	115	120	125	130	135	140	145	150	155	160	165	170	175	180	185	190	195	200	205	210	215	220	225	230	235	240
Control (1)	0.05	0.053	0.053	0.055	0.056	0.057	0.056	0.058	0.057	0.06	0.061	0.06	0.064	0.063	0.062	0.066	0.066	0.068	0.068	0.068	0.068	0.071	0.072	0.072	0.072	0.074	0.072	0.072	0.074	0.076	0.075	0.076	0.076	0.079	0.079	0.079	0.077	0.078	0.077	0.08	0.078	0.078	0.078	0.08	0.081	0.077	0.081	0.079	0.077
Control (2)	0.051	0.053	0.052	0.053	0.053	0.055	0.056	0.058	0.056	0.058	0.058	0.059	0.061	0.062	0.061	0.062	0.063	0.063	0.066	0.068	0.065	0.067	0.068	0.069	0.071	0.069	0.071	0.072	0.071	0.072	0.073	0.074	0.076	0.075	0.077	0.076	0.077	0.076	0.078	0.077	0.079	0.078	0.079	0.079	0.081	0.081	0.079	0.08	0.08
Control (3)	0.049	0.052	0.051	0.054	0.053	0.054	0.056	0.058	0.059	0.061	0.06	0.06	0.061	0.063	0.064	0.063	0.064	0.067	0.066	0.069	0.07	0.07	0.072	0.07	0.072	0.07	0.071	0.074	0.073	0.074	0.075	0.075	0.077	0.076	0.076	0.08	0.078	0.081	0.078	0.081	0.079	0.079	0.081	0.079	0.082	0.079	0.082	0.082	0.08
SUL (1)	0.094	0.094	0.094	0.094	0.094	0.095	0.096	0.096	0.099	0.098	0.097	0.098	0.1	0.099	0.1	0.104	0.101	0.101	0.101	0.103	0.103	0.104	0.103	0.103	0.103	0.103	0.105	0.107	0.107	0.107	0.109	0.107	0.109	0.108	0.108	0.111	0.112	0.111	0.11	0.112	0.113	0.112	0.112	0.115	0.114	0.113	0.114	0.115	0.112
SUL (2)	0.101	0.1	0.097	0.099	0.104	0.105	0.105	0.108	0.108	0.109	0.112	0.109	0.109	0.109	0.111	0.111	0.111	0.113	0.111	0.112	0.112	0.115	0.115	0.113	0.118	0.115	0.115	0.117	0.115	0.117	0.115	0.119	0.116	0.118	0.118	0.118	0.12	0.119	0.12	0.118	0.123	0.122	0.123	0.121	0.123	0.121	0.123	0.126	0.124
SUL (3)	0.091	0.091	0.094	0.093	0.093	0.092	0.094	0.093	0.095	0.095	0.097	0.097	0.096	0.097	0.099	0.098	0.098	0.097	0.1	0.101	0.1	0.102	0.101	0.101	0.101	0.104	0.103	0.103	0.103	0.105	0.105	0.104	0.103	0.105	0.106	0.108	0.107	0.109	0.108	0.108	0.109	0.109	0.111	0.111	0.111	0.11	0.109	0.11	0.111
	Average A420 increase/sec
	Rep 1	Rep 2	Rep 3	% of Control Rate Rep 1	% of Control Rate Rep 2	% of Control Rate Rep 3	Average %	% Inhibition	% StDev
Control	0.000158	0.000152	0.000145	100	100	100	100	0	0
SUL	8.2e-05	8.9e-05	8.9e-05	54.0659	58.6813	58.6813	57.1429	42.8571	2.66469
[truncated: 328 more columns]

## Sheet: ART
Inhibition at 300 µM Artemesinin
	0	5	10	15	20	25	30	35	40	45	50	55	60	65	70	75	80	85	90	95	100	105	110	115	120	125	130	135	140	145	150	155	160	165	170	175	180	185	190	195	200	205	210	215	220	225	230	235	240
Control (1)	0.061	0.061	0.062	0.063	0.063	0.064	0.065	0.067	0.07	0.07	0.072	0.07	0.073	0.075	0.08	0.077	0.082	0.079	0.08	0.081	0.083	0.08	0.079	0.083	0.084	0.084	0.086	0.089	0.083	0.084	0.086	0.084	0.091	0.084	0.086	0.087	0.088	0.087	0.089	0.09	0.091	0.092	0.09	0.09	0.091	0.094	0.092	0.09	0.092
Control (2)	0.066	0.066	0.067	0.068	0.071	0.071	0.072	0.073	0.074	0.076	0.076	0.078	0.079	0.082	0.082	0.081	0.085	0.084	0.085	0.087	0.091	0.087	0.088	0.089	0.09	0.091	0.091	0.093	0.093	0.097	0.095	0.093	0.093	0.094	0.095	0.093	0.093	0.094	0.093	0.094	0.093	0.094	0.094	0.095	0.096	0.091	0.095	0.094	0.094
Control (3)	0.065	0.063	0.066	0.069	0.07	0.069	0.07	0.073	0.071	0.074	0.073	0.075	0.076	0.078	0.078	0.079	0.08	0.081	0.08	0.082	0.086	0.086	0.086	0.085	0.086	0.09	0.089	0.089	0.089	0.09	0.091	0.091	0.093	0.093	0.096	0.095	0.094	0.093	0.094	0.092	0.094	0.097	0.096	0.095	0.095	0.094	0.095	0.096	0.095
ART (1)	0.066	0.068	0.069	0.071	0.071	0.068	0.072	0.077	0.074	0.076	0.076	0.083	0.079	0.079	0.082	0.084	0.085	0.083	0.085	0.087	0.087	0.086	0.09	0.09	0.092	0.09	0.099	0.093	0.093	0.094	0.091	0.094	0.095	0.092	0.093	0.092	0.093	0.092	0.096	0.094	0.092	0.093	0.092	0.093	0.094	0.094	0.094	0.093	0.092
ART (2)	0.061	0.063	0.063	0.064	0.066	0.067	0.064	0.07	0.069	0.069	0.072	0.071	0.072	0.074	0.074	0.076	0.076	0.077	0.076	0.078	0.078	0.081	0.078	0.08	0.08	0.082	0.082	0.084	0.081	0.085	0.085	0.085	0.085	0.087	0.086	0.089	0.088	0.089	0.091	0.089	0.089	0.09	0.088	0.091	0.092	0.092	0.092	0.092	0.091
ART (3)	0.061	0.064	0.064	0.064	0.064	0.066	0.066	0.069	0.068	0.072	0.07	0.071	0.073	0.077	0.074	0.075	0.075	0.077	0.077	0.077	0.081	0.078	0.081	0.081	0.081	0.081	0.083	0.084	0.084	0.085	0.087	0.086	0.086	0.09	0.087	0.087	0.091	0.089	0.092	0.089	0.091	0.091	0.093	0.093	0.093	0.091	0.093	0.093	0.094
	Average A420 increase/sec
	Rep 1	Rep 2	Rep 3	% of Control Rate Rep 1	% of Control Rate Rep 2	% of Control Rate Rep 3	Average %	% Inhibition	% StDev
Control	0.000176	0.000162	0.000178	100	100	100	100	0	0
ART	0.000178	0.000186	0.000161	103.488	108.14	93.6047	101.744	-1.74419	7.42276
[truncated: 451 more columns]

## Sheet: COR
Inhibition at 300 µM Cortexolone
	0	5	10	15	20	25	30	35	40	45	50	55	60	65	70	75	80	85	90	95	100	105	110	115	120	125	130	135	140	145	150	155	160	165	170	175	180	185	190	195	200	205	210	215	220	225	230	235	240
Control (1)	0.0619167	0.0624167	0.06325	0.0649167	0.0659167	0.06675	0.0676667	0.0691667	0.0696667	0.0710833	0.0716667	0.07225	0.0728333	0.0749167	0.0753333	0.0755	0.078	0.07725	0.078	0.0796667	0.0808333	0.0800833	0.0815833	0.082	0.0828333	0.0834167	0.0841667	0.0846667	0.0850833	0.0860833	0.0869167	0.08675	0.08775	0.0874167	0.0889167	0.08875	0.077
COR (1)	0.062	0.062	0.067	0.065	0.067	0.069	0.07	0.07	0.073	0.073	0.071	0.074	0.076	0.076	0.075	0.078	0.077	0.079	0.08	0.081	0.082	0.081	0.083	0.083	0.08	0.083	0.082	0.083	0.082	0.084	0.084	0.084	0.083	0.086	0.084	0.085	0.086	0.087	0.089	0.09	0.09	0.091	0.091	0.09	0.09	0.094	0.092	0.092	0.09
COR (2)	0.061	0.062	0.062	0.066	0.067	0.066	0.069	0.069	0.07	0.072	0.072	0.07	0.072	0.073	0.081	0.074	0.077	0.076	0.078	0.079	0.078	0.08	0.082	0.081	0.084	0.082	0.084	0.086	0.083	0.086	0.086	0.086	0.086	0.089	0.089	0.088	0.09	0.09	0.092	0.091	0.092	0.093	0.093	0.093	0.092	0.093	0.094	0.092	0.092
COR (3)	0.063	0.063	0.065	0.067	0.069	0.066	0.068	0.069	0.07	0.07	0.073	0.071	0.073	0.075	0.074	0.076	0.076	0.077	0.078	0.076	0.078	0.079	0.08	0.081	0.081	0.081	0.084	0.085	0.085	0.086	0.088	0.086	0.087	0.086	0.09	0.088	0.09	0.091	0.09	0.094	0.091	0.092	0.094	0.093	0.095	0.094	0.095	0.096	0.096
	Average A420 increase/sec
	Rep 1	Rep 2	Rep 3	% of Control Rate Rep 1	% of Control Rate Rep 2	% of Control Rate Rep 3	Average %	% Inhibition	% StDev
Control	0.00015675	0.00015675	0.00015675	100	100	100	100	0	0
COR	0.00015	0.000165	0.000146	95.6938	105.263	93.1419	98.033	1.96704	6.39021
[truncated: 215 more columns]

## Sheet: CLO
Inhibition at 300 µM Cloxyquin
	0	5	10	15	20	25	30	35	40	45	50	55	60	65	70	75	80	85	90	95	100	105	110	115	120	125	130	135	140	145	150	155	160	165	170	175	180	185	190	195	200	205	210	215	220	225	230	235	240
Control (1)	0.066	0.066	0.068	0.071	0.073	0.072	0.073	0.074	0.074	0.076	0.076	0.077	0.079	0.079	0.079	0.081	0.083	0.085	0.085	0.086	0.087	0.088	0.091	0.092	0.093	0.095	0.094	0.094	0.096	0.096	0.099	0.099	0.102	0.104	0.101	0.103	0.104	0.104	0.106	0.107	0.106	0.106	0.106	0.107	0.106	0.105	0.106	0.105	0.107
Control (2)	0.07	0.073	0.074	0.072	0.076	0.077	0.077	0.08	0.08	0.082	0.084	0.085	0.085	0.085	0.086	0.087	0.089	0.089	0.09	0.093	0.095	0.093	0.096	0.097	0.097	0.098	0.1	0.099	0.1	0.101	0.099	0.103	0.102	0.102	0.101	0.101	0.102	0.101	0.103	0.101	0.102	0.103	0.102	0.101	0.102	0.099	0.099	0.1	0.1
Control (3)	0.066	0.065	0.069	0.071	0.072	0.071	0.073	0.075	0.076	0.075	0.079	0.08	0.08	0.082	0.081	0.083	0.084	0.085	0.087	0.086	0.089	0.088	0.09	0.09	0.09	0.093	0.093	0.094	0.093	0.096	0.097	0.096	0.096	0.097	0.097	0.098	0.097	0.098	0.097	0.098	0.097	0.097	0.099	0.097	0.096	0.097	0.097	0.097	0.098
CLO (1)	0.067	0.068	0.068	0.07	0.07	0.072	0.073	0.072	0.073	0.075	0.078	0.077	0.078	0.077	0.08	0.08	0.081	0.081	0.083	0.084	0.085	0.086	0.085	0.087	0.086	0.09	0.09	0.088	0.092	0.092	0.091	0.092	0.092	0.093	0.094	0.094	0.095	0.097	0.097	0.096	0.098	0.098	0.1	0.099	0.099	0.099	0.099	0.1	0.098
CLO (2)	0.063	0.063	0.064	0.065	0.067	0.068	0.071	0.07	0.071	0.072	0.074	0.075	0.075	0.076	0.077	0.078	0.077	0.082	0.079	0.079	0.08	0.083	0.082	0.083	0.084	0.084	0.085	0.088	0.085	0.086	0.087	0.089	0.088	0.091	0.091	0.091	0.091	0.09	0.092	0.093	0.092	0.092	0.095	0.093	0.094	0.094	0.094	0.096	0.095
CLO (3)	0.065	0.066	0.068	0.071	0.07	0.072	0.073	0.075	0.075	0.076	0.078	0.076	0.078	0.08	0.083	0.081	0.082	0.084	0.083	0.085	0.085	0.088	0.086	0.089	0.088	0.089	0.09	0.091	0.09	0.093	0.091	0.095	0.094	0.094	0.095	0.096	0.095	0.097	0.096	0.097	0.099	0.098	0.099	0.098	0.1	0.099	0.099	0.1	0.098
	Average A420 increase/sec
	Rep 1	Rep 2	Rep 3	% of Control Rate Rep 1	% of Control Rate Rep 2	% of Control Rate Rep 3	Average %	% Inhibition	% StDev
Control	0.000182	0.000215	0.000185	100	100	100	100	0	0
CLO	0.000174	0.00016	0.000165	89.6907	82.4742	85.0515	85.7388	14.2612	3.65701
[truncated: 81 more columns]

## Sheet: MIC
Inhibition at 50 µM Miconazole
	0	5	10	15	20	25	30	35	40	45	50	55	60	65	70	75	80	85	90	95	100	105	110	115	120	125	130	135	140	145	150	155	160	165	170	175	180	185	190	195	200	205	210	215	220	225	230	235	240
Control (1)	0.054	0.056	0.057	0.057	0.059	0.059	0.058	0.06	0.061	0.062	0.063	0.066	0.066	0.065	0.067	0.067	0.065	0.067	0.068	0.069	0.067	0.069	0.071	0.071	0.071	0.072	0.074	0.074	0.074	0.075	0.074	0.076	0.074	0.076	0.077	0.076	0.076	0.077	0.078	0.078	0.079	0.078	0.079	0.08	0.08	0.081	0.08	0.08	0.08
Control (2)	0.064	0.066	0.066	0.068	0.069	0.069	0.068	0.07	0.071	0.072	0.072	0.074	0.075	0.079	0.077	0.079	0.078	0.079	0.081	0.08	0.081	0.082	0.081	0.082	0.082	0.082	0.085	0.086	0.086	0.084	0.087	0.085	0.085	0.087	0.088	0.087	0.089	0.085	0.088	0.086	0.086	0.087	0.085	0.085	0.087	0.086	0.086	0.085	0.086
Control (3)	0.063	0.065	0.067	0.067	0.068	0.069	0.07	0.068	0.07	0.071	0.072	0.073	0.073	0.073	0.074	0.077	0.076	0.078	0.077	0.078	0.077	0.078	0.079	0.078	0.081	0.081	0.083	0.08	0.083	0.082	0.085	0.083	0.083	0.084	0.084	0.084	0.084	0.085	0.087	0.084	0.086	0.086	0.085	0.084	0.084	0.083	0.086	0.084	0.085
MIC (2)	0.1	0.104	0.104	0.106	0.104	0.106	0.109	0.108	0.109	0.109	0.11	0.112	0.111	0.112	0.113	0.113	0.114	0.114	0.115	0.114	0.116	0.117	0.117	0.117	0.119	0.117	0.12	0.119	0.12	0.119	0.121	0.12	0.12	0.12	0.121	0.12	0.12	0.12	0.12	0.121	0.121	0.12	0.121	0.121	0.12	0.119	0.119	0.118	0.119
MIC (2)	0.095	0.099	0.098	0.099	0.1	0.101	0.103	0.102	0.103	0.104	0.104	0.104	0.105	0.108	0.106	0.108	0.107	0.106	0.107	0.109	0.11	0.109	0.11	0.112	0.111	0.111	0.113	0.114	0.114	0.115	0.113	0.115	0.115	0.116	0.115	0.115	0.116	0.115	0.115	0.116	0.117	0.116	0.119	0.117	0.117	0.119	0.118	0.116	0.116
MIC (3)	0.104	0.104	0.107	0.105	0.107	0.105	0.107	0.108	0.109	0.11	0.111	0.11	0.111	0.112	0.114	0.115	0.114	0.114	0.113	0.114	0.116	0.117	0.117	0.117	0.119	0.118	0.119	0.122	0.121	0.122	0.121	0.121	0.121	0.122	0.123	0.125	0.124	0.125	0.123	0.123	0.123	0.123	0.124	0.123	0.123	0.124	0.123	0.122	0.124
	Average A420 increase/sec
	Rep 1	Rep 2	Rep 3	% of Control Rate Rep 1	% of Control Rate Rep 2	% of Control Rate Rep 3	Average %	% Inhibition	% StDev
Control	0.000136	0.000153	0.000132	96.9121	109.026	94.0618	100	0	7.94571
MIC	0.000128	0.000115	0.000117	91.2114	81.9477	83.3729	85.5107	14.4893	4.98812
NOTE: Miconazole was tested at 50 µM as it precipitated above this concentration
[truncated: 20 more columns]

[truncated: 1 more sheets: CHL]
