# Supplementary material for: Large-scale phenotypic drug screen identifies neuroprotectants in zebrafish and mouse models of retinitis pigmentosa
Source: eLife. 2021 Jun 29;10:e57245. doi: 10.7554/eLife.57245 (PMC8425951; doi:10.7554/eLife.57245)
Supplement: Figure 2—figure supplement 2—source data 1. [file elife-57245-fig2-figsupp2-data1.xlsx]

## Sheet: Combined
CTL	WAR_4µM	MIC_2µM	CLO_4 µM	CPO_2 µM	ZPT_0.04 µM	DHA_4 µm	CHL_2 µM	CAL_0.4 µM	SUL_20 µM	ART_100 µM	COR_100 µM	RA_1.25 µm
1.22452	1.03746
0.370429	0.828867
0.866173	1.16252
0.681747	0.773172
0.891919	1.86108
1.32382	0.895597
0.357556	0.859342
0.710383	0.391183
0.689891	1.41026
1.3367	1.16435
1.25131	0.848045
1.01434	0.623686
1.48986	0.977301
1.71448	1.74338
0.846732	0.625
0.875631	0.605034
1.18721	0.843579
0.950242	0.976513
0.768443	1.31226
0.723518	0.89297
0.431641	0.65889
1.69714	1.40632
0.824926	0.730086
1.82456	1.20455
0.961801	1.63724
1.45781	0.740332
1.34957	1.33643
0.693831	0.9752
1.09474	1.7573
0.389082	0.585067
1.487	0.755062
0.982147	0.233235
1.42328	0.703396
0.883981	1.89122
1.19152	0.331647
0.491811	1.38686
1.61788	1.87843
0.771792	0.565128
0.816323	1.19398
0.82641	0.563652
0.582842	0.434487
1.18561	0.967631
0.727507
0.449494	0.833299
1.33963	0.721356
1.24564	1.15437
0.691095	1.00798
0.322052	0.342964
1.15609	1.34873
0.978702	0.289822
1.10762	1.03111
0.662063	0.413574
1.1492	1.05792
0.88841	1.73967
0.219704	0.822474
1.2978	0.807958
1.38293	0.707579
1.39695	0.711269
1.14674	0.828379
1.57778	0.466224
1.04741		0.29926
0.701511		0.615522
1.41954		1.66925
0.772925		0.355128
1.17032		0.291487
0.879318		0.555282
0.891949		1.28643
0.782641		1.31266
0.546052		1.74503
1.19315		1.83879
0.629611		0.102506
1.30586		1.07073
0.542165		0.451318
1.15089		1.72123
0.246792		0.509616
1.0751		1.77807
0.485325		0.699082
0.776326		2.94596
2.17498		0.538764
0.655845		0.998342
1.72123		1.70763
0.86863		1.23882
0.40711		1.03672
1.04644		2.29594
0.833652
		0.734546
0.872517		0.370674
1.13923		0.813248
1.73775		1.06053
1.92575		1.92041
1.11556		0.71232
1.22084		0.257884
0.883759		0.415318
0.975516		0.339499
2.84155		0.416767
0.80311		0.356884
0.845125		0.306177
0.606075		0.50128
1.02622		1.29473
0.764476		0.414836
0.823876		0.27382
1.12329		0.359299
0.737432		0.633119
0.894384		0.464094
2.40498		0.878447
0.756749		0.582895
1.21553		0.142947
0.813734		0.334187
0.908871		1.57145
0.505626		0.351572
0.886657		0.947989
0.538465		0.342396
0.967789		0.220698
0.582412		0.326943
0.418216		0.436567
0.870237		0.450572
1.174		0.848988
0.637949		0.54909
1.77959		0.184962
0.877964		0.231323
0.931254			0.752167
0.424481			0.605937
1.19322			0.626361
1.39954			0.29542
0.406128			0.447866
1.50374			0.570119
0.603272			0.464739
1.14172			0.467403
0.743878			0.271147
0.528677			0.19744
0.758975			0.274403
0.899284			0.468587
1.3137			1.1953
0.550878			0.29542
1.31933			1.08755
0.64205			0.307852
0.83505			0.453194
0.502628			1.27315
0.831498
3.25199			0.366167
0.741214			0.278547
			0.193296
1.50196			0.515949
1.11715			0.569231
0.931254			0.752167
0.424481			0.605937
1.19322			0.626361
1.39954			0.29542
0.406128			0.447866
1.50374			0.570119
0.811282			0.3481
1.90184			0.866395
0.602536			0.565698
0.604535			0.572266
0.47232			0.20332
1.94296			0.122221
0.520008			0.360665
0.934073			0.484313
0.863539			1.06686
0.870393			0.573408
1.85929
2.33361			0.291844
2.00065			0.564842
1.08913			0.282992
1.48721			1.37698
0.763022			0.327825
0.712192			0.815279
0.605677			0.583689
2.36017			0.340961
0.591399			0.485455
0.882101			0.613958
0.94778			0.555133
0.301839			0.454044
1.09827			0.588258
0.709622			1.10741
0.441479			0.430627
0.531716			0.251295
0.528004			0.41435
0.672784			0.787009
0.560558			0.380083
1.29272			0.827545
0.855207			0.329635
0.980145			0.356836
0.904537			0.394179
1.13275			0.452268
0.884712			0.432905
1.61221			0.329635
1.21619			0.364673
0.388646			0.411698
0.661114			0.529721
0.864427			0.961243
0.801266			0.670795
1.91004			0.532026
1.41443			0.469326
0.794812			0.972308
1.58778			0.237429
2.76663			0.147529
1.50664			0.280766
0.492839			0.945107
0.552311			0.555538
1.43933			0.410315
0.366056			1.02302
0.555077			0.544474
0.952483			0.307045
0.783286			0.424607
0.778215			0.624693
0.440282			0.409854
0.786513			0.793429
0.642212			0.123094
0.63714			0.406627
1.05939
0.8583
0.876562
0.370482
0.512377				0.556037
0.755657				0.293657
0.723751
2.88808				0.982563
2.01361				0.392732
1.37005				1.09066
0.397559				0.156379
0.869635
1.94561				0.313807
0.422328				1.28588
0.708428				0.562544
0.431354				0.59403
1.54763
0.658471
0.547011				0.511538
0.972278
1.73423				0.719973
1.02769				0.215152
1.44037				0.320524
0.822826				0.134549
0.972698				0.426526
0.940163				0.607254
0.680301				0.414562
0.50566				1.36438
0.947509				0.830593
				0.820727
1.00176				0.9151
1.61092				0.220783
1.08269				0.689572
1.29048				0.71155
1.73205				0.878636
0.758504				0.763749
0.885629				0.842172
1.14263				0.181072
1.04697				0.496262
1.09867
1.04572				1.43933
1.02175				0.883881
0.523735				1.31895
0.826687
0.570689
0.511747				0.888127
0.298956				2.12941
0.462295				0.446061
0.931334				0.342663
1.31596				0.865649
1.55397				0.90461
0.961804
0.902363				0.228026
1.15412				0.885879
1.33419				1.55797
1.4221				0.800962
1.04672				0.541717
0.435572
1.30971				0.646364
0.720292				0.289715
1.09569
1.15013				0.135837
1.23258				0.892193
0.356772				1.14273
1.62054				0.61999
0.905407
1.16175
1.28015				0.775912
0.791769				0.219348
0.643246				1.28015
0.78754				0.634261
1.50003
0.886908
0.673902				0.887436
1.44717				0.628975
1.18924
1.39854				0.151694
0.676016				0.269561
0.894308				0.475695
1.0423				0.147466
0.580877				0.0676545
0.750013
1.07031				0.457725
1.15541				0.533836
0.92972				0.578234
1.30023				0.680245
1.40066
0.836696
0.411741				0.327173
0.830353				0.540707
1.55913					0.986149
0.737231					0.850468
1.71318					0.558704
0.958264					1.13101
1.44964					1.28641
1.45814					0.492054
0.683163					1.10041
0.656979					0.819523
0.836186					0.937861
0.536261					0.962005
1.17624					0.194849
1.03682					0.963025
1.18712					1.17318
1.36871					0.584888
0.867811					0.960645
0.643717					1.13237
0.284283					0.741652
1.25785					1.42039
0.989889					1.21092
1.05518					0.66514
0.961665					2.22394
0.616853					0.311487
0.707987					0.325769
0.704926					0.568566
1.21262					2.23278
0.903856					1.05654
0.733491					0.701526
1.29594					0.709347
1.20242					0.971186
1.20446					0.748453
0.581443					0.840154
1.14293					0.677254
1.33434					0.951532
1.51302					0.745659
1.22625					0.569165
0.875672					1.00437
0.804417					1.08374
0.605122					1.17823
2.23522					2.02146
1.54438					3.15584
0.969729					0.395741
0.43959					0.837085
0.459103					0.513696
0.668045					0.356276
0.791482					0.49791
0.770434					2.11946
1.39419					0.614111
1.12408					1.27755
0.407799					0.262
0.862079					1.00327
0.742589					2.28455
1.63142					1.19643
1.52442					0.93158
0.71913					0.786
0.716061					0.383244
0.904394					0.473354
0.776573					0.255203
0.58517					0.468531
2.32446					1.3339
0.326459					0.967756
1.42995						1.20235
0.988696						0.914183
1.19044						0.514497
0.726379						0.880221
0.709651						0.324159
1.24797						0.438717
2.02758						0.906326
1.12353						1.88184
0.594586						0.477494
0.972983						0.920266
0.314021						0.940795
1.09185						0.414639
0.405515						1.01353
0.791008						1.3055
0.932685						1.21756
1.04699						0.35812
0.373074						0.688362
0.567214						0.443532
3.4266						0.567974
1.75081						0.965633
0.770479						1.64512
0.904045						0.707877
0.680251						2.01769
0.76617						0.678224
1.95838						1.22542
0.547952						1.04141
0.285381						0.448094
0.588757						0.343421
0.708891						1.19424
1.07816						0.706103
0.592652						0.401988
0.617374
1.27573						0.659029
0.871368						1.05966
1.42711						0.429419
0.981094						0.942486
1.03596						0.788058
0.998026						0.712199
0.697298						0.852065
0.357285
0.839196						0.701362
0.801605						1.40543
0.484959						0.909298
3.68664						1.27607
0.903541						0.634985
0.980078						0.751483
0.440256						0.308857
1.49958						0.692218
1.01428						1.02647
0.628211						0.385732
0.962806						2.01265
1.57442						0.814135
1.22086						0.88593
1.18124						0.485636
0.918442						0.620422
						0.520179
0.552352						0.825988
1.06068						1.32314
0.846985						0.98956
0.549981						0.766384
0.921573						1.02148
0.543969						0.584185
0.168482						0.842411
1.08328						0.443218
0.762403						0.226477
0.482587						1.00624
1.14128						2.04295
1.81097						1.68779
0.830982						0.487667
0.696788						1.35675
1.25515						0.413586
0.783146						0.575295
0.888977
0.790766						0.557092
1.57899						1.23398
0.385223						1.72377
1.57857						1.46596
0.830982						1.01174
1.21578						1.45454
1.3686						0.873737
1.35759						0.295479
1.10318						1.40204
1.48925						0.895327
1.3123						1.21705
0.979144						0.737004
0.547779						0.101174
0.426709						0.305639
1.47443						0.49825
0.50333						0.850878
1.68779						0.917763
0.43686							0.448386
0.975194							0.998247
1.17114							0.512118
0.491778							1.19984
0.44251							1.1169
1.04955							0.722525
0.953724							0.367026
1.3725							0.794394
0.464884							1.02469
2.06836							1.28143
1.6428							1.24278
0.995309							1.33476
							0.793264
0.469856							1.1221
1.33725							1.17814
1.50019							0.786484
1.51127							0.507146
0.606813							1.17905
0.805694							1.10334
1.82428							1.56257
0.528842							0.816994
0.786484							0.40974
0.570653							0.48658
1.15035							0.757103
0.612689							0.83982
0.503982
2.08667							1.42539
0.892478
0.502626							0.33629
1.24527							0.779252
0.92841							0.65468
0.875682							1.89113
0.878205							0.695298
0.486406							1.49252
0.719013							0.477324
0.989463							0.732636
1.39489							0.749792
0.842885							1.18725
1.37849							1.11661
0.811602							1.15698
0.822955							0.834812
0.616585							1.14512
1.2087							0.703876
1.39337							1.4022
0.836326							0.830019
1.39009							1.27404
1.40447							1.17792
1.17868							0.657455
1.01116							0.859788
1.73345							0.990472
0.684702							0.955657
1.16329							1.1204
0.621126							0.866095
0.574958							0.691262
0.876691							0.950611
1.1431							0.364552
0.395583							0.779057
1.05985							0.814629
0.30577							0.355975
2.2741							1.00309
0.373932								1.14893
1.79998								0.94564
								0.527553
1.25357								1.39201
1.84276								1.67672
0.318509								2.49449
0.611262								1.00175
0.647828								1.01141
0.86308								1.25817
1.131								1.47572
1.03004								1.47595
1.10869								0.567108
2.07066								1.00819
1.96878								2.66237
0.397159								0.424756
0.620921								0.658636
1.75675								1.64337
0.740276								0.904015
0.680253								0.682783
1.26047								0.986115
0.39003								1.09282
0.741426								1.38511
0.590335								1.25541
1.1333								0.979905
1.94532								0.869979
0.715899								1.56472
0.382211								1.13583
1.44629								3.1046
0.508465								0.737056
0.670825								0.777761
								1.84318
0.946824								0.622125
0.769657								1.24704
0.705232								1.58377
1.32822								2.15693
0.69922								0.874454
1.12829								1.03015
0.729069								0.587336
1.01941								0.849328
0.471157								0.33651
1.69586								1.29192
1.43215								1.06622
1.58849								0.615038
2.2963								0.570371
0.722198								0.800581
0.849328								0.371085
1.46974								1.16265
0.467721								1.32349
0.832793								0.852979
0.536441								1.19636
1.19765								0.343812
1.07138								0.36228
0.622769								0.549111
0.709957								0.355837
0.563714
1.32242								0.767509
1.00481								0.517113
0.569726								1.00395
0.893781								0.689341
1.3557								0.468365
1.13418									0.313179
0.648659									0.579091
0.759193									1.23454
0.989472									1.35331
0.935417									0.4082
0.806218									0.450377
1.04547									1.19284
1.2549									0.906329
0.909723									1.03213
0.55776									1.16061
0.965232									1.12231
1.18145									0.840639
0.904632									0.477283
0.782463									0.444802
0.592665									0.823913
1.05856									0.377415
0.856152									0.7255
0.625874									0.418623
1.21636									1.30895
0.709016									0.680413
0.662233									0.961111
1.41634
1.02462									1.64637
1.02607									1.40616
1.57559									1.69291
0.965232									1.41706
1.40616									0.554124
0.391959									1.38676
2.36751									0.513401
1.2309									2.854
0.962774									1.62842
0.982169									1.75099
1.92632									1.71453
0.923208									1.15595
0.572156									0.550046
1.19319									0.873945
0.524056									0.330493
0.764556									1.34214
1.55627									1.60087
0.686976									1.29366
0.890236									0.354543
1.69358									0.883642
1.29559									1.4814
0.452682									0.892176
1.661									0.644694
0.430184									0.770762
0.530263									0.861144
0.601637									1.5745
1.26961									0.958895
1.25254									0.752919
1.49847									0.503498
1.12996									1.05781
1.26185									1.39102
0.357646									1.46317
1.21646									0.653228
1.01786									0.910407
0.408849									0.964326
0.441045									1.20793
1.29521									1.10397
1.20366									1.01553
1.30553										1.58201
1.86689										0.625298
1.34846										0.866651
1.04136										0.741471
0.978022										2.00467
0.287283										1.35686
0.444282										2.02359
0.730965										0.444583
1.03656										1.51957
0.818921										0.546047
1.096										0.721058
1.47904										0.75498
1.38388										0.495615
0.537942										2.09353
0.729764										0.64511
0.590175										2.18209
1.24039										1.30313
1.39589										1.21787
1.55139										0.368634
										0.785599
1.1041										0.51903
0.766387										1.33525
0.757081										0.980423
0.465896										1.51086
										0.343719
0.926989										1.18035
1.77083										0.965414
0.966614										0.464095
0.423269										0.538542
0.956108										0.774192
1.11135										0.760304
0.359267										0.833623
0.666099										0.649435
0.715423										0.543899
0.89139										0.820737
0.71209										0.519237
1.26532										0.674986
0.699648										1.03381
0.718756										1.24466
0.960044										0.802962
1.21911
0.518126										0.803851
1.55127										0.66721
0.436141										0.657434
1.53794										1.36375
0.926717										0.960711
1.27999										0.757193
1.8461										0.837623
0.833179										0.661655
0.64788										0.710535
1.77634										1.0167
1.07625										0.438585
0.428587										0.774523
1.61681										0.638771
1.46817										0.296167
0.513905										1.43418
1.69324										0.222848
0.898056										0.656767
1.21133										0.445473
0.421478										0.701648
0.396429											0.704762
1.33357											0.425952
0.395476											0.114286
1.05643
0.697381											0.200476
0.382619											0.474286
0.322857											0.300238
0.82119											0.457381
0.630476											0.355714
0.474286											0.199524
0.420476											0.42381
0.675952											0.249048
0.800476											0.477857
1.38357											0.761667
0.326905											0.838571
1.52952											0.197857
1.48738											0.31119
1.25905											0.627619
1.43429
0.742619											0.639762
1.37952											0.604048
1.1431											0.217143
2.10738											0.326429
1.41833											0.361667
1.44286											0.455238
1.56048											0.299286
1.04833											0.26619
											0.476667
1.46667											1.00857
0.862381											0.524524
1.10965											0.180289
0.904123											0.0263838
0.605871											0.0781955
1.61859											0.0328842
1.01042											0.347004
0.418508											0.361917
1.14215											0.131345
2.02888											0.0225601
1.57959											0.572223
1.40159											0.274927
0.73607											0.231719
0.450628											0.602812
1.32894											0.115859
0.343563											0.459231
0.39308											0.0569737
0.264603											0.256573
1.88568											0.0921521
											0.238601
0.880033											0.483129
0.186598											0.0256191
0.908138											0.258676
2.70166											0.36402
1.12666											0.393845
0.589429											0.336489
0.639712											0.239175
0.956508											0.353505
0.933948											0.0671066
1.41842											0.0598415
0.695729											0.0806809
0.741232											0.102285
0.847268											0.163379
0.476523											0.716355
0.698028											0.604294
0.897015
0.469192											0.79019
1.81445											0.693315
1.30232											0.162856
1.86368											0.496945
1.68197											0.240356
2.28417											0.801711
0.664514											0.580206
1.87939											0.182754
0.9321											0.611625
1.24891											0.482807
1.1934											0.523128
1.04992
0.602723											0.389073
0.735207
0.437773											0.419969
0.668703											0.449293
0.356083											0.698551
0.811136
0.558213											0.774481
1.17874											0.574446
0.98656											0.118869
0.474428											0.282248
0.841508											0.866643
1.35312											0.496422
0.789143											0.459766
0.903823											0.231454
1.31694												2.86213
0.398508												1.42818
1.5842												1.13515
0.936069												4.2954
1.11209												2.43853
0.587417												0.696965
1.38647												2.22316
1.02221												0.687468
0.717314												1.52823
0.8757												1.30202
0.789554												1.29591
1.48245												2.99847
1.31185												2.79939
0.380532												1.21011
2.06207												0.861794
1.89283												0.916737
0.455147												0.7068
0.452433												0.978464
0.882822												1.88333
0.992369												1.76632
0.352722												1.45939
0.418179												1.16195
1.29184												1.11073
0.928608												1.43361
1.65542												3.62015
0.687129												3.20298
1.2196												1.15245
0.691538												0.951331
1.23147												2.33441
0.884518												1.91691
