# Supplementary material for: Large-scale phenotypic drug screen identifies neuroprotectants in zebrafish and mouse models of retinitis pigmentosa
Source: eLife. 2021 Jun 29;10:e57245. doi: 10.7554/eLife.57245 (PMC8425951; doi:10.7554/eLife.57245)
Supplement: Figure 2—figure supplement 3—source data 1. [file elife-57245-fig2-figsupp3-data1.xlsx]

## Sheet: Combined
+Mtz	WAR_4µM	MIC_2µM	CLO_4µM	CPO_2µM	ZPT_0.04µM	DHA_4µM	CHL_2µM	CAL_0.4µM	SUL_20µM	ART_100µM	COR_100µM	DEX_1µM	-Mtz
1.07982	-1.58363	-1.33978	-2.1753	-1.74431		-1.24716	0.486263	1.44087	-0.9069	-0.672501			1.49569
-1.01087	-0.215044	-1.81236	-2.11481	-2.14695	-1.40216		-0.78592	0.115761	-0.956048	0.352051			1.42197
-1.16398	-0.0524768		-1.90877	-1.64979	-0.84641		1.78491	-0.681952	-0.835068	-0.390844
-0.298218	-1.85584	-2.24713	-2.08457	-1.77645	-1.97304	-0.984403	-0.961719	-0.765126	-1.38515				0.0874066
-0.621462	-1.26039	-0.466456	-2.16963	-1.91444	-1.98816	-0.538288	1.62801	0.612915	-1.13752	0.671514			0.276438
0.000452032	-0.559082		-2.1753		-0.167786	-2.02786		-0.460785	-0.925803	3.30095			-0.220715
-0.974951	-1.73108		-2.14128	-2.09969	-0.748113	-0.976842	-2.06188	0.387967	-0.772688	-1.27929			1.42953
-1.63278	-1.9031		-2.18097	-1.49668	-1.86907	0.0212455		-1.09971	-1.7651	-1.28496	-0.455114		1.58265
-1.46265	-0.831287			-2.01841	-1.69705	-1.41729	-0.201812	0.0552712	-0.704636	-1.01843			2.46732
2.88508	-0.717868	-1.58363	-1.89176	-1.96359	-1.09404	-1.38893	0.522179	1.36526	-0.593107	0.737676			1.78113
-0.570424	0.331257		-2.31897	-1.87285	-0.583656	-0.712197	0.488154	0.505167	-0.615791	-1.19234			4.17805
	-0.36816	-1.88797	-2.25659	-1.41161	-1.90877	-0.349257	-0.160225	-0.334134	-1.96359	1.74521			3.58071
-1.57985	-0.288766	-2.07701	-2.19799	-2.1961	-1.72163	1.34447	-0.799152	-0.237728	4.72057	-0.247179			3.91908
3.01551	-0.944706	-2.12426	-1.13563	-1.57607	0.624257	-0.695185	0.0080133	-1.0052	0.905914	-1.29252
1.69796	-0.477798	-1.4929	-1.86907	-1.81236		-0.239618	0.779263	-0.107296	-1.04111	-0.211263			0.000452032
-1.03922	0.157348	0.0722841	-2.27927	-1.92011	-0.0127802	-1.59498	-0.0468059		-1.80858	-2.16963	-1.98438		2.14407
	-1.00142	-0.916352	-1.54205		-0.903119	-1.81047	-1.55528	1.26696	-0.353037	-0.536398			0.754688
-1.08459		-1.79157		-2.02219	-0.957939	0.113871		-0.72921	2.02498	0.818959			-0.0657091
-0.422979	-0.564753	-1.62522	-2.04865	-1.52503	-1.46643	-0.929584	-1.10916	-1.63467	-1.26039	2.98148
-1.03166	1.7868	-1.16587		-2.30573	-0.387063	-0.778358	-0.986293	0.0080133	-0.101625	-1.06191			9.37075
-0.269863	1.13653	-2.03542	-2.12615	-0.916352	-0.693294	-1.26606	0.123323	0.425773	1.75656	0.240522	1.13464		0.0968582
0.374735	-0.651707	-1.20557	-1.9409	-0.833178	-0.232057		-0.415418	-0.468347	3.40113	0.157348	-1.09971		4.71679
1.82461	-1.70461	-1.98816	-2.25659	-2.215	0.0269165	1.11952	-1.46832	3.37467	0.370954	2.55427			7.28195
1.28965	-1.34167		-1.61577		-0.636585	-1.19801	-0.982513	-1.24527	0.603463	-1.62144			0.480592
-0.441882	-1.66681	-1.60443	-1.43808	-1.68949	-0.944706	-0.553411	-1.34167	-1.60254	-1.82181	-1.07703			0.52596
-0.424869	-0.292547	-1.12618	-2.12048	-2.14884	2.58262	-1.06191	2.5883	0.0628325	-0.802933	0.191374
1.47868	-1.14319		-2.09024	-2.14695	0.159239	-1.22825	-1.83883	1.97772	0.0571615	0.159239			0.278329
-0.0600381	-1.38515		-2.13561	-2.05432	0.1668	-1.46643	-1.67059	-0.111077	-0.704636	-0.177238			-1.4154
-1.31899	1.73765	-1.09026	-2.02975	-1.39649	-1.64412	-1.73675	0.359612	5.14211	-0.90879	1.1422	-1.55528		-0.077051
1.76601	-0.13376	-2.10158	-2.16396	-1.85206	-0.273644	-0.515604	-1.22825	-2.1375	-1.56473	-0.235838	0.983417		0.756579
-0.00899955	-0.0675994	-1.23203	-1.86907	-2.08268	-0.55152		-0.753784	-1.83694	1.07415	1.55051			-0.619572
2.47866	-1.99572	-1.84072	-2.14317			-1.05434	-0.0789413	0.0325874	-1.64979	-1.69138	-1.91444		2.98526
-1.19801													-0.784029
0.669624													0.922927
-0.167786													-1.40216
-1.25472													-0.198031
-0.918242													-1.64601
2.97581													3.76596
-1.18667													-1.87663
-1.15264													-0.912571
-2.13561													2.04577
0.70365													-0.649817
0.0231358													-0.629023
2.09303													-0.863423
-2.07134													0.284
1.6318													-1.20557
-2.11859													-0.717868
1.63369													-1.34734
-0.324503		1.02432	-0.350483	0.634625	0.161688	-0.0928068
-0.202558	-0.0848538	0.384372	-0.296933		0.0174744	-0.31602							2.68278
-0.426832	0.0105819	0.223722	-0.440087		0.770886								0.910858
0.317567	-0.407214	-0.259819	-0.460764		0.0100517								0.955925
0.163809	-0.243913	-0.407744	0.148433	-0.263	-0.185061	-0.313899							0.576303
-0.348362	0.287345	-0.472429	-0.430543	-0.42312		-0.126739							0.319157
-0.42206	-0.251336	-0.397671	-0.418348	-0.439026		-0.392369							1.89013
0.256064	-0.329805			-0.313369	-0.0816726	-0.215283							1.59428
-0.116135	0.986146	0.367405	-0.319732										1.4909
-0.266182			0.608115										0.227963
	0.335593	0.083219	-0.447509	-0.39608	0.0720849								0.0333804
-0.00638447	0.0439844	-0.111894			-0.212101								-0.0116865
		0.029669			-0.245504								1.04818
	0.226903	-0.311779	-0.474019	-0.115075		0.367405							1.97019
0.108138	0.320748	0.414593	-0.488335	-0.425771	0.83504	-0.156431							-0.0514513
-0.345181	-0.0201696	-0.384416		-0.249745	0.718396	0.0932928							0.959637
0.320748	-0.0339548	0.180245	-0.400852	-0.225886		-0.204148							0.109199
-0.303295	-0.0816726	0.0630715	-0.445389	-0.23596	0.040273	-0.275725							1.74433
-0.095988		0.0848096	-0.460234	-0.118786	-0.385476								0.451177
0.197212	-0.326094	0.626672			0.573652								2.04548
		0.114501	-0.0705384	-0.442738	0.129876								0.626142
		-0.219524	-0.23596		-0.18188	-0.373282							0.72741
	-0.134692	0.229024	-0.217403	-0.432134		-0.282087							1.00735
0.210467	0.234325	-0.446449	0.080568	-0.443268	-0.0652365	-0.293222							1.4734
0.336654		0.403989	-0.454402	-0.354725	-0.163853								0.694537
0.21895	0.626672	0.324459		-0.39661	-0.162263								0.723168
-0.239141	0.201983		-0.432664	-0.415167	-0.110834								0.0757962
		0.666437	-0.444328	-0.451751	-0.10235								1.38963
	0.478217	-0.1278	-0.427892	-0.238081	-0.415697								2.95742
0.533357		-0.285269	-0.457053		0.35468								0.686584
-0.0837934	-0.0991691	-0.0779612	-0.302235	-0.381235	0.750208								0.0593601
0.517451	-0.31655		-0.18294	-0.39608	0.508968								1.63246
0.086202								0.348243	-0.240383	-0.331408			0.0497922
-0.299963								1.17408	0.0371039	-0.393746	-0.385471		2.0573
-0.425191								-0.316513	-0.0423358	-0.244245			0.758681
-0.136119									-0.125086	-0.190734	-0.30548		1.2607
0.275423								0.256666	0.0668938	-0.127292	-0.282862		0.967762
-0.0495075								-0.30548	0.233496	-0.408641			0.207017
0.277078								-0.411399	-0.467669	-0.363405			1.1807
-0.0666091								-0.413054	-0.381058	-0.13667	0.0497922		1.56742
-0.299963								-0.0770907	-0.108536	-0.418571	-0.390988		0.159573
-0.236522								0.202603	0.0873054	-0.0506108	-0.551522		1.56356
-0.0859173								-0.21611	-0.1466	-0.151565	-0.366715		2.46332
-0.344648								0.0812371	-0.140532	0.441474	0.283146		1.34014
-0.0285442								-0.339683	-0.20949	-0.267967	0.242323		0.12206
0.114889								-0.0759874	-0.473186	-0.33858	-0.220523		0.0161406
-0.186872								0.0558605	0.261631	-0.111846	0.127577		1.19119
0.338313									0.0326906	-0.2459	-0.357888		2.13508
-0.0417841								0.00731401	-0.0263375	-0.108536	-0.450016		0.12206
								-0.220523	0.0817887	-0.215007			0.697446
-0.0257859							-0.405883	0.2346	0.0288289	-0.195699	-0.208939		1.09133
0.0624805							-0.544902	-0.553177	0.0238639	-0.246452	-0.392643		1.67279
-0.250865									0.605318	0.00510735	-0.0241309		2.5891
-0.0792973								-0.422984	-0.119569	0.216947			0.156815
0.0343456								-0.261347	0.262735	-0.215007	0.639522		1.07754
-0.221627							-0.27238	-0.0583341	0.0773754	-0.126189	-0.201767		-0.173632
0.107717								-0.3452	-0.23266	-0.191285	-0.501872		0.639522
0.140817								0.0608255	0.0685488		-0.234867		0.656072
0.147988							-0.543247		0.219705	-0.264657	-0.331408		2.06392
0.109372							-0.274587	-0.0484041	-0.0351642	-0.120121			1.08361
0.0299323								-0.177494	-0.302722	-0.22604	-0.264657		0.832604
1.25132								-0.3452	-0.325891	-0.338028	-0.147704		1.48743
-0.074884							-0.223833	-0.0097876	0.0420689	-0.120672	-0.340235		0.491676
-0.121776							-0.427398	-0.0594374	-0.246452	-0.160944			0.471264
-0.124939			0.419943	-0.461194									-0.084686
0.311949			0.178919	-0.412597		-0.317365							1.35066
-0.0321614			-0.368908	-0.451377		-0.489666							1.18425
0.0763241			0.0900688	1.01588		-0.37529							0.682076
-0.174518			-0.382162			-0.344364							0.0444166
-0.229988						-0.339455							0.95648
			-0.412106	-0.475921		-0.484266							2.01679
0.258442			0.888247	-0.343873		-0.362527							0.438106
-0.0714322			-0.258459	-0.174518		-0.166664							0.197082
0.0974321			-0.468558	-0.416524		0.203954							2.97991
0.197082			-0.458249			-0.187772							1.53916
-0.428305			-0.426833			-0.328165							0.605007
			-0.349764			0.0625793							0.874502
0.319803				-0.407688		-0.41407							2.07177
				-0.313929		-0.300184							0.924082
0.107741			-0.31982	-0.454322		-0.383635							1.68152
-0.0243072			-0.238824	-0.446959		-0.245696							0.051289
-0.0483606			-0.446959	0.16861		-0.174027							3.11146
0.136703			-0.465612	-0.363999									0.429761
0.35711			-0.318838	-0.3586									0.454796
-0.246187			-0.301166	-0.441559									1.30697
0.383618			-0.388544			-0.287912							1.36882
-0.231951						-0.266313							0.613843
-0.363999			-0.28693			-0.36989							0.0527616
-0.219679			-0.324238	1.83958									0.687966
-0.20888			-0.401307	-0.473957		0.355637							1.23334
0.120995			-0.428796	-0.479848		-0.0434517							1.73993
-0.256987			-0.290858	-0.401307		-0.163228							1.26377
0.245679			-0.174027	-0.330619		-0.188263							0.722328
0.0586522			-0.294294			-0.30902							0.47934
0.134248			-0.339946	-0.393943		-0.221643							0.872539
-0.144083			-0.122975	-0.315893		-0.338473							0.149957
0.560918												-0.0154267	0.545364
0.0467874												0.0977684	0.131036
0.369955												0.252007	0.150045
-0.00721792												0.0234571	0.711268
0.212692												1.17744	0.515121
												0.608874	0.0083356
0.178128												0.368227	-0.0115383
0.0908557												-0.0918982	0.813662
-0.316992												0.0467874	0.0398747
0.0701176												0.8344	0.425256
0.278362												0.76873	-0.0988109
0.0865353												0.271017	0.261944
0.748424												-0.0573348	1.94907
-0.0668398												0.43865	0.46414
-0.302303												0.0869673	1.01024
-0.0270919												0.411863	0.687074
-0.23188												1.82162	1.48678
-0.226695												0.0895595	0.15307
-0.277244												0.696147	0.544068
0.285275												0.820575	0.393285
-0.0348686												1.37229	0.654239
-0.176146												0.189361	0.344465
-0.214166												-0.049126	0.526354
0.284411												0.17208	1.5248
1.04178												-0.180035	0.936794
-0.296254												0.697011	1.56542
-0.0473979												-0.0979468	0.912168
-0.0810972												0.121963	0.416616
0.592889												0.588136	1.36408
0.0973363												-0.132942	0.263241
-0.0633834												-0.339458	0.0800546
												-0.00764997	0.563942
-0.0785049													0.505184
0.0238891													1.20293
1.22151													0.222197
0.194114													0.731142
0.271017													0.769594
-0.0059218													0.389829
0.0614768													3.99695
0.210099													1.56153
-0.00937814													0.852978
0.0597486													-0.116525
-0.151088													1.10183
-0.0409172													0.0865353
-0.103563													0.930746
-0.126462													0.741943
0.204483													0.522466
-0.00721792													0.576039
-0.346371												0.801133	1.19256
-0.159297												0.234294	3.17218
-0.182195												0.0204328	-0.0508542
-0.226695												0.346625	0.205779
0.123691												0.346625	0.964445
-0.0257957												0.811502	0.228677
-0.211574												0.5	0.0295057
-0.183059												0.337552	0.782123
-0.345939												1.05129	1.04351
-0.190404												0.579928	0.649054
-0.288477												0.741943	1.48246
												2.22687	0.444266
0.063637												0.34144	0.657263
-0.18738												0.339712	4.67828
0.0476514												-0.0154267	0.432601
-0.219351												0.710404
0.160414												0.259352	2.4956
-0.135967												0.630044	3.17823
												1.01931	2.03548
0.0256173												0.530675	1.95209
-0.162753												0.484446	0.694851
-0.166209												0.609738	2.8758
-0.285453												0.555301	0.878901
-0.176579												0.0718458	0.903095
-0.17485												-0.0819612	0.662016
-0.0206112												-0.15368	0.36261
-0.0754806												-0.0357327	1.58788
-0.184787												0.0485155	0.450315
-0.169666												0.0623409	2.21348
-0.221943												0.148749	0.422664
-0.268171												0.0372824	1.39606
-0.348963												-0.131646	1.09276
-0.100971													0.999873
-0.148928													3.12768
-0.307919													0.258488
1.46561													1.53258
0.180288													3.22748
-0.247865													1.0474
0.000558837													1.72441
-0.12603													0.578631
-0.334274													0.504752
0.0217289													0.510369
-0.18738													2.8529
-0.261691													0.851682
0.352673													0.62918
-0.165345													1.65355
0.262809													0.0930159
-0.164481													2.88747
-0.0822381												0.0806521	1.91611
-0.109107												0.0778533	0.429383
-0.313979												-0.314539	3.52262
0.0672179												0.0140407	1.25167
-0.246248												0.22507	-0.40522
0.185887												0.206038	2.57774
0.0190785												0.119276	0.776434
0.535177												-0.0788795	1.11173
-0.0626465												-0.158366	3.70958
0.0728155												-0.0251426	2.55591
0.0369908												-0.0391366	0.702546
-0.166762												0.100803	1.24104
-0.222178												0.871593	3.07761
0.0840107												0.159578	1.34291
-0.157806												-0.314539	0.48312
-0.377232												0.338142	1.5573
0.542454												0.0465067	5.1129
-0.319576												0.770836	2.46635
-0.0251426												-0.111346	-0.0257023
-0.14829												0.311833	0.818976
-0.162844												0.0470665	0.471925
0.29616												-0.0967919	0.215554
0.262574												0.241303	1.90827
-0.0447342												-0.159485	1.3597
-0.0788795												-0.0721624	0.236825
0.00844305												0.381803	0.38908
-0.126459												0.0118016	2.97405
0.182528												0.00564425	0.336463
-0.317897												0.0968852	0.776994
-0.033539												1.01041	0.349897
0.22619												-0.0273816	0.798265
-0.270877												-0.350363	2.00735
-0.306142													0.180849
0.235706													1.94521
-0.294947													4.34938
0.930928													0.1092
-0.399622													0.105841
0.617462													-0.0049912
0.789868													0.10808
-0.176838													0.560367
-0.186354													0.326387
0.0185187													0.581078
0.113118													0.190925
-0.369955													-0.249047
-0.402421													2.09579
0.0593812													0.0280347
0.0364311													2.91472
-0.139893													0.998099
0.114238												0.405313	1.0524
0.333104												0.228989	0.796026
-0.363798												-0.327973	-0.00275215
-0.117503												-0.350363	0.50663
-0.301664												0.427144	0.707024
0.17805												-0.233933	0.141666
-0.163963												0.143905	0.390759
0.0644191												-0.305023	3.23434
0.643211												-0.0682441	0.338702
-0.26472												0.139987	0.64601
-0.196989												-0.363798	0.250259
-0.329652												0.0582617	0.0828912
-0.0480927												1.04232	1.22984
-0.345885												-0.347005	0.587795
0.0353115												0.560367	0.360532
-0.280393												0.163497	0.208277
-0.369395												-0.0738417	1.91611
0.347658												0.681835	0.455691
0.207158												0.162377	1.20745
-0.333011												0.0778533	0.650488
0.254738												0.487598	0.104722
0.253058												-0.305023	1.09662
-0.153328												0.0285944	0.0269151
-0.275355												0.387401	3.03171
-0.332451												0.00172593	0.279927
-0.223298												-0.038017	1.05016
-0.186913												0.0470665	0.400275
-0.0525708												0.195963	-0.0967919
-0.0464135												-0.120302	-0.33357
1.34403												0.0453872	0.588355
-0.296067												0.117037	0.766358
0.392439												0.099684	-0.401301
-0.290469													-0.28823
0.031953													0.811699
-0.408578													1.32612
0.419307													1.33619
0.22507													0.653287
0.183648													0.633135
-0.382829													0.999778
-0.0951126													1.48509
0.69303													1.4571
0.183088													0.41259
-0.230015													0.688552
0.266493													2.39582
-0.295507													0.956117
0.0101223													0.420986
0.140546													0.282166
0.284965													0.868795
0.155141												0.114277	0.127899
0.215756												0.88252	1.35518
0.338348												0.153098	0.813051
0.595791												0.0264197	0.117683
-0.314794												-0.263033	0.0495759
-0.0437301												-0.0450922	-0.00763362
0.515425												-0.274612	0.394876
0.409179												-0.159511	1.40694
0.622352												1.41239	0.302932
0.102699												0.452086	1.64327
0.0781807												1.22578	0.637336
0.398963												0.0570677	0.744944
0.159909												0.222567	0.00326344
-0.211272												0.363547	0.0822671
-0.279379												0.652319	0.00326344
-0.167003												-0.149295	1.94022
-0.0450922												0.272966	2.94274
-0.115923												3.67625	4.33552
0.305657												0.35878	0.247085
0.164676												0.904995	0.554927
-0.00967681												0.0652405	0.460259
0.231421												0.188513	0.305657
-0.290957												1.2285	0.0168848
0.172168												0.477966	0.125174
0.394195												0.975145	1.00715
-0.301173												0.791938	1.69435
-0.0757402												0.571954	3.38952
-0.307984												0.961523	3.60951
-0.0158064												-0.278017	1.40354
-0.288914												0.0155226	0.628482
0.0659215												0.12858	0.893417
0.104742												0.214394	0.973101
0.182384													1.9157
0.102699													3.66059
0.295441													0.245723
0.00122024													1.44167
0.336305													3.43924
-0.181305													0.0216522
0.0414031													0.559694
-0.143166													1.90752
0.019609													1.39945
0.139477													2.24806
0.0727322													1.14064
-0.194246													1.31159
0.565143													0.0345925
0.125174													1.17061
1.13111													0.887968
0.202135													0.820543
0.215075												0.0890778	-0.166322
0.125855												0.450724	2.25487
-0.267801												0.394195	0.541306
0.221886												0.0550245	-0.0600757
0.0359546												0.21167	0.894098
0.367634												0.308381	0.759247
-0.342718												-0.194246	0.467069
-0.265758												-0.0151253	0.945178
0.191238												-0.157468	1.69095
-0.158149												0.607369	0.604645
-0.207186												0.10951	0.00666877
-0.279379												0.21167	0.21848
-0.212634												0.158546	0.612818
-0.26712												-0.327054	1.53907
-0.043049												-0.262352	0.251853
0.495674												-0.0791455	1.23395
0.17966												0.910443	0.771506
-0.24192												0.616223	0.246404
-0.296406												0.185108	0.892736
-0.0103579												0.0666026	0.661173
-0.237153												0.142882	0.302251
-0.348848												0.125855	0.790576
-0.00422828												0.11632	1.07799
-0.149295												-0.0614378	0.639379
-0.279379												0.381936	1.19649
-0.282103												0.450724	0.69114
-0.291638												0.0454895	1.46279
-0.0723349												0.462983	0.354012
0.482053												-0.135674	0.83825
-0.196289												0.0454895	0.159228
-0.275974												-0.140441	0.317916
-0.201737												-0.043049	0.949945
-0.33727													0.712934
-0.158149													2.16497
-0.361107													1.31227
-0.131588													1.34701
-0.171771													1.81967
-0.0212549													0.29476
-0.181305													0.861407
-0.352253													0.431654
0.258663													3.23969
-0.0886805													2.27598
-0.133631													0.906357
-0.0777834
-0.274612													0.523598
-0.25418													0.313148
-0.271887													0.381936
-0.0859562													0.861407
