# Supplementary material for: Large-scale phenotypic drug screen identifies neuroprotectants in zebrafish and mouse models of retinitis pigmentosa
Source: eLife. 2021 Jun 29;10:e57245. doi: 10.7554/eLife.57245 (PMC8425951; doi:10.7554/eLife.57245)
Supplement: Figure 2—source data 1. [file elife-57245-fig2-data1.xlsx]

## Sheet: Combined
+Mtz	WAR_4µM	MIC_2µM	CLO_4µM	CPO_2µM	ZPT_0.04µM	DHA_4µM	CHL_2µM	CAL_0.4µM	SUL_20µM	ART_100µM	COR_100µM	POS_2µM	-Mtz
0.0966581	0.950851												0.654829
-0.0034588	0.694349												0.673648
-0.0680079	0.400961												0.610981
-0.0124919	0.726717												1.47741
-0.0203959	0.109079												0.846782
-0.0113628	0.475672												1.15635
0.0520572	0.291999												0.708839
-0.021525	0.42599												0.989242
-0.0346983	0.498819												0.794277
-0.0213368	0.186989												1.8248
-0.0892733	0.277132												2.40161
0.0486697	-0.018514												0.891195
0.0716289	0.480001												0.714673
-0.0209604	0.715802												0.5788
0.0545036	0.158573												0.405289
0.0577029	0.63187												0.833044
0.0513044	0.664615												0.394562
0.157443	0.346198												0.911708
0.0132901	0.494491												0.796724
-0.0495653	0.177015												2.16148
-0.0670669	0.22124												0.679858
0.00312784	0.566756												0.96346
-0.087015	0.299903												1.19644
-0.025477	0.682869												1.31801
-0.0181376	0.397009												0.525542
0.0426477													1.3899
-0.0373329	0.751746												0.876893
	0.220487												0.982655
-0.0986828	0.763979												0.272051
0.0377547	-0.120701												1.96896
0.00589393	0.445857												1.36137
0.455701	0.464409												1.53478
0.137656	0.46706												2.13793
0.0164954	0.577618												0.601472
0.0657167	0.22739												1.55069
-0.0808113	0.589734												1.33563
0.122132	0.463652												1.0721
-0.13344	0.264874												0.883926
-0.0353762	0.212623												0.51098
0.0577656	0.297057												1.19932
0.024068	0.414431												1.13533
0.125918	0.0596587												0.573832
0.0517076	0.606772												1.51244
-0.0637731	0.449643												1.01228
-0.0198526	0.403072												1.23075
-0.0838403	0.424275												0.964195
-0.0202312	0.421246												0.691584
-0.0717243	0.815395												1.18115
-0.0429487	0.333783												1.73848
0.0433778	0.189527												0.407237
-0.108451	0.315231												1.22658
0.0570084	0.492427												0.507573
-0.0872479	1.60861												0.942234
-0.126625	0.249729												1.64648
-0.11413	0.478418												0.184984
-0.0955777	0.183091												0.691206
-0.0789181	0.451536												0.583298
-0.0323472	0.495835												0.475389
0.00248631													0.650314
0.0293687	0.465166												0.456458
0.0553848	0.179449												0.789455
-0.0592758	1.08885												2.18267
0.0208046	0.122725												1.01605
0.0335447	0.527071												0.813722
-0.000732188	0.631721												1.3758
0.0229279	0.226466												2.27428
-0.0177189	0.149419												1.10644
0.168832	0.298053												0.45882
-0.0529058	0.042948												0.594714
-0.0477491	0.286223												0.509174
	0.190369												0.904116
-0.0189323	0.316556												0.890162
-0.019539	0.106648												0.535564
0.0353647	0.560134												0.47975
-0.0174156	0.0183779												0.712712
0.0499247	0.309883												0.449417
0.0159512	0.219792												1.40492
-0.0389524	0.304726												1.24901
0.00594118	0.183392												0.832225
0.0104912	0.301996												0.836169
-0.0113489	0.193099												0.881972
0.00503118	0.407253												1.3306
0.00624452	0.200076												1.6852
-0.0155956	0.167012												1.27236
-0.0386491	0.138802												0.973883
-0.0753526	0.0735849												1.09006
0.097245	0.264383												0.794005
-0.0459291	0.0860216												0.609274
-0.0174156	0.0826849												1.14011
-0.0501758	0.196132												0.807352
0.0634181		0.721991											1.19224
0.207499		0.169493											0.769639
0.260252		0.259118											1.45544
0.918258		0.479777											0.86834
0.25458		0.206364											1.95632
-0.118668		0.247773											1.85762
-0.128311		0.522887											0.322082
-0.118101		0.373702											0.176867
0.00272278		0.439502											0.955129
-0.118101		0.370298											2.12422
-0.116399		0.482046											0.785522
-0.0375517		0.258551											2.3012
-0.162346		0.330591											1.08162
-0.176527		-0.127177											0.918258
-0.15327		1.14345											0.551817
-0.0494639		0.855294											1.40836
0.125815		0.0668216
0.0305178		0.145102											0.732201
-0.170287		1.01696											0.908047
-0.00918939		1.10999											0.799136
-0.0954108		0.049237											1.1877
0.0180384		-0.0976798											1.7419
0.0594474													0.84168
0.0322196		0.716318											0.732768
-0.149299		0.77361											0.546712
-0.00975663		0.677178											0.362924
-0.149866		0.731067											0.840545
-0.158942		0.423052											0.816154
0.0968856		0.112769											0.227352
-0.148165		0.178002											0.538203
-0.0901288		0.24626											1.70709
0.0327097		0.164052											0.990378
-0.0202054		0.274135											0.855255
0.0397965		-0.00177958											0.768323
-0.0145359		0.37335											1.75528
-0.0750102		0.123421											1.36362
-0.0461904		0.0738133											1.26865
-0.0117012		0.395556											1.0466
0.0738133		0.43477											0.745646
0.116334		0.293505											0.96014
-0.066506		0.372405											0.824073
0.195234		0.357287											0.929903
-0.00461432		-0.0565845											0.824073
-0.0438282		0.0223157											1.13778
-0.0683959		0.651154											0.509418
-0.061309		0.295395											1.06361
-0.039576		0.154131											1.37968
0.077593		0.113027											1.35086
-0.093436		0.16358											2.14884
-0.0608366		0.321853											0.720133
0.0530253		0.434297											1.00502
-0.0348515		0.314766											0.817459
-0.0598917		0.412092											0.635563
-0.0683959		0.182478											0.688951
-0.0721755		0.313348											0.928486
0.266575		0.212715											0.885492
0.035072		0.482015											0.317128
-0.0688683		0.153658											0.811789
0.0568049		0.208936											0.993685
0.0534977		0.0435762											0.567057
-0.00425019		0.151597											2.71626
0.11308		0.245816											0.586547
0.00108298		0.472772											0.761949
0.0638959		0.617953											1.28223
-0.150023		0.171152											0.874538
0.353072		0.31811											1.15423
0.25352		0.29263											0.481068
-0.0166943		0.303889											0.577658
-0.0166943		0.35722											0.738246
-0.0451378		0.147449											1.61703
-0.0475081		0.412922
-0.0949141		0.555733											1.0292
-0.00602791		0.33411											0.991275
0.0478964		0.110709											0.536178
													1.15423
-0.0155091		0.445514											0.232187
0.0686365		-0.074174											0.677803
0.153375		0.146856											1.5323
-0.0723962		-0.0575819											1.38652
-0.104988		-0.00484276											1.64666
-0.102618		0.185374											0.945054
-0.0131388		0.316333											0.556325
-0.148838		0.0680439											0.564621
-0.0374344		0.234557											0.363146
0.0852285		0.056785											0.851427
0.084636		0.255297											0.480476
-0.151209		0.199003											1.49615
-0.0486933		0.181818											0.737653
-0.0842477		0.543289											0.731135
-0.0641002		0.332332											2.2979
0.0580641													0.68975
-0.00139832			0.387551										0.326459
-0.0437551			0.0307765										0.479595
0.207127			0.249484										0.693416
0.0368857			0.344787										1.59228
0.0621368			0.234822										2.26917
-0.027464			0.0413657										0.80786
-0.0335732			0.153367										0.514621
-0.0437551			0.303652										0.420948
-0.0698208			0.14685										0.497516
-0.0315368			0.0857589										1.13042
0.0161146			0.249077										0.649023
-0.00302742			0.139927										0.657575
-0.0775591			0.84085										2.15432
0.0136709			0.559829										0.664092
-0.027464			0.291841										0.63151
0.0238528			0.243782										0.346009
-0.0645262			0.43846										0.6254
0.068246			0.162327										0.910494
-0.099552			0.581415										1.33488
-0.0148384			0.28003										1.5878
0.0446239			0.476337										0.89013
0.107752			0.227084										0.80786
-0.0694135			1.24202										2.36732
-0.0213549			0.322387										1.37112
-0.0323513			0.358227										0.955702
0.0352566			1.00539										1.65296
-0.0771518			0.789533										2.09933
0.0735406			0.488963										0.283288
-0.0087293			0.522359										0.589153
-0.145353			0.521181										0.849578
0.0261492			0.105138										2.76532
0.00775459			0.740293										1.47067
0.224703			0.0293953										0.567167
0.0526591			0.519016										1.14984
0.132189			0.153829										0.774918
-0.169158			0.211177										1.19799
-0.0533804			0.20739										0.695929
-0.0988259			0.420551										0.76518
0.299904			0.766803										1.08763
0.205226			0.366449										2.44233
0.0683486			0.899352										0.862022
-0.257885			0.331283
-0.011181			0.226867										1.07302
0.576364			0.0667255										1.06977
-0.150223			0.856612										0.110548
-0.274657													0.428125
-0.157797			-0.0431011										0.619646
-0.0869235			1.08763										1.24452
-0.0798903			0.134894										1.48527
0.252836			0.460046										1.02649
0.0396746			0.134894										1.52315
0.213882			0.731095										0.114876
-0.0836774			0.488178										1.10115
0.0775459			0.256082										0.579069
-0.156174			0.923698										1.24506
-0.0896286			1.04921										0.220375
-0.155633			1.29105										0.913418
-0.213522			0.0899893										1.01188
0.00667255			0.613695										0.605038
-0.0918375			-0.0194034										1.20672
-0.0535759													0.321154
0.0325856			0.0623771										1.34429
0.100055			0.247551										0.659375
0.0320015			0.325243										2.27746
0.0252838			0.45872										1.17401
-0.0386802			0.093921										1.02417
-0.0302101			-0.0451058										0.704646
0.00746734			0.317357										1.15327
0.0504021			0.129554										1.94128
-0.0115174			0.0723076										0.744076
-0.0985552			0.0910003										0.822643
-0.0681796			0.0150612										0.773283
-0.0655509			0.0755204										1.96377
-0.0506552			0.134519										0.669013
0.0533228			0.349485										0.67982
0.122252			0.0305411										0.428637
0.00454661			0.227106										0.578178
-0.0567888			0.0428082										0.845717
-0.0363436			0.15584										0.3784
-0.0173589			0.154088										1.8116
0.146202			0.19235										1.28178
0.304214			0.692963										1.7196
-0.0865802			0.101807										0.222141
0.0138929			0.13744										0.652073
-0.0468583			0.0574118										0.891573
-0.065843			0.196439										1.29609
-0.0360516			0.187092										0.939765
-0.0506552			0.24025										0.652949
0.0130167			0.086035										0.842504
-0.00372292				0.0420637									0.755858
-0.0558614				-0.00742819									0.506546
0.0955254				0.0788517									1.79095
0.061384				0.47611									1.12242
0.062972				0.379243									2.06091
0.0687946				0.208801									0.88369
0.0380937				0.36257									1.16873
0.0158621				0.287141									0.426353
0.0108335				0.627232									0.591238
-0.041305				0.285818									0.873368
0.00818689				0.269673									0.988231
-0.0537441				0.188687									1.67688
-0.0341591				0.435616									1.30027
-0.0558614				0.290052									0.840285
-0.0278072				0.0500035									0.776237
-0.0489802				0.459701									0.956207
0.0200967				0.188951									1.34156
-0.0196027				0.438792									0.478492
-0.0214553				1.0237									0.911215
-0.0550674				0.273908									0.561066
-0.0394523				0.165661									1.81768
0.0216847				0.391418									1.23807
0.0481509				0.141577									0.8207
-0.0153681				0.303815									1.47468
0.0576787				0.268085									0.334251
-0.0582433				0.157192									0.247971
0.0243313				0.212771									0.723304
0.0118922				0.17016									1.29471
0.0203614				0.753741									1.10018
-0.0352177				0.411532									0.937946
-0.0296563				0.242507									1.16425
-0.0143818				0.238341									1.13315
				0.211403									1.51806
-0.0224356				0.444963									0.830157
0.0700443				0.228343									1.30839
0.0508818				0.320823									1.37282
0.0472715				0.308048									0.969294
0.0372737				0.471624									2.58839
-0.0304894				0.0922617									0.982346
-0.0182698				0.298884									0.514948
0.0528258				0.502173									0.359426
0.0108905													1.37365
-0.0588166													0.333598
0.0186666				0.416914									0.213624
-0.0782568				0.103093									1.5475
-0.000495924				0.380255									0.524112
0.0111682				0.150582									1.41059
-0.00882745				0.34915									0.771003
-0.0154927				0.15447									0.928469
				0.496618									0.962628
-0.0557617				0.504395									0.704073
-0.0324334				0.163913									0.844321
0.0170003				0.196406									1.10538
0.0175557				0.180576									1.31533
-0.0252128				0.641865									1.13537
0.0350519				0.168079									0.718792
0.0947612				0.301661									0.69963
-0.0166035				0.200849									0.557161
-0.0121601				0.0272758									1.52056
-0.0440976				0.267501									0.592986
-0.0444546				0.550453									1.64253
-0.0186317				0.490635									1.22512
-0.0774687				0.214101									0.716504
0.0856405				1.00284									1.26565
0.0375903				0.322623									0.531821
-0.0774687				0.282418									0.738731
0.0228811				0.563201									1.83277
-0.0601445				1.32252									1.21727
0.0186317				0.06897									0.262478
0.0317066				0.503383									0.807701
0.00196123				0.268362									0.812604
0.112444				0.409571									1.31206
-0.0607982				0.107214									2.36361
0.00228811				0.868172									1.12771
0.0500114				0.427549									0.378191
0.00555683				0.449122									0.780571
-0.0738731				0.411205									0.561239
-0.030726				0.198085									1.17772
-0.0676625				0.195143									0.774687
0.107868				0.266074									0.379172
0.0921779				0.198411									0.930605
-0.00490308				0.557971									1.21204
0.0353022				0.190566									0.566143
-0.0379172				0.0575295									0.308567
0.0120943				0.208871									0.370673
0.0797568				0.235021									1.80172
-0.0202661				-0.028111									1.20877
0.010133				0.294185									1.65888
-0.0876017				0.318373									0.470696
-0.0441277				0.163109									1.56376
-0.0138269					-0.00284327
-0.0339245					0.196497								1.23386
0.00790663					0.155835								1.34557
0.0186565					0.115406								1.28364
-0.0147616					0.1334								3.02886
0.204677					0.0990471								1.42058
-0.0615003					0.0677322								1.30514
0.00627078					0.173595								0.530913
0.0191239					0.424816								1.13852
-0.0273811					0.182008								1.67204
0.0490367					0.596113								0.579287
-0.0636036					0.328067								1.0392
-0.0243431					0.259361								1.26541
0.0270695					-0.0147616								0.243937
-0.0187344					0.37574								0.463609
-0.0467776					0.295116								1.46218
-0.055658					0.582793								0.866964
0.0511399					0.419207								1.81529
0.0284717					0.331105								0.943615
-0.0227072					0.179671								0.564331
-0.0156964					0.375507								0.836584
-0.0855708					0.1119								0.768579
-0.041169					0.31498								0.59401
-0.00354435					0.00790663								0.995262
0.23529					0.501935								0.272915
-0.0142943					0.367327								0.762503
-0.0682775					0.4795								0.398642
0.0831559					-0.0255115								0.352371
-0.0946848					0.475761								0.801062
-0.0243431					0.0212272								1.01513
0.0512203					0.357978								0.570131
-0.0440897					-0.0853908								0.916424
-0.0596218					0.375275
-0.0592688					0.425401								0.796051
0.0314523					0.157473								2.20946
0.00886031					0.240429								1.06645
-0.0479727					0.0709884								0.788638
-0.0564448					-0.00702471								1.44804
-0.0352647					0.194891								0.515063
-0.0289107					0.262315								1.11869
-0.0207917					0.187831								1.03115
-0.0709178					0.348447								1.03892
-0.0162027					0.480822								2.11168
-0.0804488					0.0519263								1.72691
0.0611044					0.162768								0.87477
-0.0472667					-0.0832728								1.09963
-0.0352647					-0.0536207								1.34355
-0.0391477					0.341387								1.36897
0.146883					0.327973								0.7724
-0.0578568					0.167357								0.218189
0.110171					0.353389								0.617433
0.0829904					0.0113313								0.502355
0.133116					0.544715								0.294438
0.0794604					0.479057								0.91713
0.0240393					0.166298								0.407398
-0.0515027					0.126056								2.38208
0.0018003					0.346329								1.01103
0.0201563					-0.0151437								1.02268
-0.0356177					0.32762								0.325855
0.0353353					-0.0878618								0.504473
-0.080573					0.192012								0.661019
-0.11665					0.232098								2.29693
-0.0954048					0.236508								0.66623
-0.0958057					0.345943								0.991729
0.0168361					0.161547								0.710325
-0.0164353					0.318283								1.0735
-0.0561205					0.0998143								0.961264
0.0352757					0.290223								1.33006
-0.11625					0.169965								3.06698
-0.051711					0.119056								0.953246
0.0404869					0.243322								0.80613
-0.0821764					0.0705515								0.732372
0.107831					0.0797712								0.574433
-0.00962065					0.105426								1.57939
-0.0364783					0.0232499								1.10758
-0.0352757					-0.0781678								2.50017
-0.0585256					0.704713								0.746803
0.00280602					0.271383								0.772057
0.0348749					0.334719								0.345141
0.0469007					0.0485041								0.446959
0.0481033					0.19562								0.822165
0.105827					0.384024								1.79586
0.0769652					0.226887								1.57177
-0.0737583					0.228891								0.92719
-0.0994134					0.129879								0.0990125
0.155133					0.0356766								0.139499
-0.0629351					-0.0364783								0.250939
0.048905					-0.0521119								0.50789
0.287417					0.519916								0.860648
0.0797712					0.32149								0.702708
-0.0436327						0.195058							1.00076
-0.0446286						0.221284							0.88922
-0.0167427						0.362042							1.38154
0.0340497						-0.000143856							1.0894
0.0652554						0.460307							1.4237
-0.02637													1.17339
0.137294						0.125011							1.1641
-0.0645472						0.02907							0.750122
0.000852072						0.324529							0.957607
-0.0582396						0.39192							0.734851
-0.0698588						0.262781							1.62886
0.0111433						0.213981							0.626295
-0.0499402						0.106088							0.587454
0.0234264						0.112064							1.41573
0.098785						-0.0207264							0.489189
-0.0542559						0.449352							0.91611
0.200702						0.143934							1.91137
-0.0847977						0.209001							0.398227
0.02907						-0.0273659							1.5701
-0.080482						0.11472							0.936692
0.0220985						0.304278							1.06749
0.106088						-0.0134229							0.55824
0.0948013						0.126339							0.656505
-0.0884495						0.140614							0.809877
0.0274101						0.139286							1.02367
-0.0592356						0.0101474							0.760413
-0.0652111						0.633266							0.999436
-0.0545879						0.32818							0.853698
0.109076													1.07778
-0.0990727						0.289671							1.14816
-0.00832577						0.231218							0.225507
0.183944						0.155071							0.960953
0.0722624						0.0789252							1.83886
-0.0517926													0.684288
0.0240364						0.149043							1.28711
-0.0451298						0.147774
-0.06607						0.043073							2.36934
0.0421212						0.132228							1.56536
-0.0127676						0.309585							0.628448
0.0665514						0.172839							0.749647
-0.0206995						0.0357756							2.01526
-0.0162577						0.154754							1.83473
-0.0121331						0.0621096							0.896863
-0.041957						-0.00102841							0.393346
0.101769						0.137621							1.31408
0.0218155						0.13889							0.790893
0.00626894						0.0995482							0.595451
-0.0536963						0.0300647							1.18146
						0.155071							0.315296
0.0395829						0.00214435							0.382876
-0.0365634						0.12493							0.640504
-0.0562345						0.230901							1.16306
-0.0140367						0.207739							0.966981
-0.0562345						0.00182707							1.81284
0.0135663						0.164907							1.58472
0.0027789						0.0751179							0.178233
-0.0654355						0.0319683							0.930812
-0.0175268						0.0722624							0.533582
0.00436528						0.01896							0.527871
-0.00420118						0.118585							0.63162
0.0554918						0.260475							0.813651
0.0450429						0.0133889							0.663064
-0.00781618													0.868047
-0.0253334						0.259245							1.06412
0.0631748						0.00754984							0.902467
0.102205						0.0782335							0.468223
-0.0489971													1.25496
-0.0711242													1.30598
0.0637895						0.271538							1.32503
-0.0299432													2.26605
-0.0662071						0.533375							0.99958
-0.0308652						0.0853019							1.43259
0.107122						0.0880678							0.690416
-0.0788072						0.019228							0.875115
-0.0612899						0.411676							0.91015
-0.0403921						0.330544							0.286289
0.0127743													1.6176
-0.0118113													0.738358
0.102205						0.264162							0.835164
-0.0502264						0.377564							0.72545
0.0342867						0.113575							1.28324
0.0963654						-0.0373189							2.15726
-0.0643631						-0.0446946							0.959014
-0.0597533						0.0785408							0.996199
0.122488													0.847764
-0.0342457													0.181493
-0.0705095													0.942726
-0.0462312						0.267236							0.643088
0.0613309													0.75188
-0.0683583						0.0935995							1.19504
							0.189134						0.795476
0.204384							0.0052177						2.10851
-0.0597476							0.120813						0.56154
-0.0643226							0.0845181						1.52351
-0.0673726							0.233054						0.731426
0.0277878							0.197979						1.26792
-0.0344325							0.107088						0.335534
0.194014							0.182423						0.830856
0.0049127							0.103428						1.33502
-0.0295525													1.16331
0.0131477							0.246474						0.783886
-0.0146074							0.0829931						0.268739
0.0140627							0.102208						1.32709
-0.0868927							0.198589						0.558185
0.0942781							-0.0435825						1.39328
-0.0768277							0.0354128						0.310219
0.100683							0.080858						0.911682
-0.0377875							0.111358						0.214449
-0.0609676							0.136673						2.19574
-0.0414475													1.40761
0.0332778							0.51152						1.00196
-0.0536476							0.136063						1.0837
-0.00545735							0.118068						1.38016
-0.0130824							0.0512729						1.20906
							0.149788						1.11847
-0.0658476							0.0222978						1.28287
0.069573							0.148263						1.11969
-0.0396175							0.0393779						0.767416
-0.00301733							0.282464						0.676831
-0.00149233							0.167783						0.335839
0.0744408							0.0900472						1.03146
-0.0312799							0.174875						0.381786
-0.0441174							0.00698092						1.47725
0.0178047							0.371214						0.631991
0.0125187							0.236546						0.615378
-0.00787032													1.95149
0.0125187							0.166065						0.838147
0.0167978							0.31634						0.718833
0.00471548							-0.0735682						1.23057
-0.0146666													0.34277
-0.0652615							0.159017						1.00478
0.046752							0.170345						0.430367
-0.0131563							0.13158						0.747026
0.0230907													0.690641
-0.0121495							0.0293836						0.842678
-0.0567032													1.18526
0.0349214							0.0276216						0.749543
-0.0108909							0.135608						1.20087
0.132839							0.233777						1.24618
0.0444866							0.0756994						1.57291
-0.0345522													1.04556
-0.0408451							0.160779						2.60897
0.0437314							-0.0458794						1.7267
0.0152875							0.0492692						1.21471
-0.00862546							0.0251045						0.912906
-0.0408451							-0.0461311						0.461831
-0.0378245							0.0769579						0.838398
0.0301388													0.474669
-0.0637512							0.170848						1.00503
-0.0275042													0.821282
0.0110149													1.36726
0.0964246							0.280792
0.0351652							0.197149						1.01119
-0.0193203							0.258703						0.889556
0.0519526							0.0749249						1.62113
0.00247394							0.226601						0.536726
0.031631							0.185663						0.766154
-0.0643812							0.0581375						1.14873
0.0254462							0.402132						0.150321
-0.0908877							0.193026						1.08188
0.0180833							0.124109						1.84202
-0.0814632							0.261354						1.56164
-0.0888261							0.127643						0.671909
0.0160217							0.221888						1.44295
-0.0352241							0.505507						1.25034
-0.00577252							0.140307						0.419509
0.013371							0.237498
0.0189668							0.298168						1.0645
-0.0375803							0.0566649						0.598575
-0.00341639							0.34588						1.4456
0.0204394							0.223067						0.931967
-0.069977							0.363551						0.769394
-0.0149025							0.274312						1.41409
-0.0369912							0.358544						1.09159
0.169759							0.0107204						0.64069
-0.0764564													1.28303
0.136184													0.723449
-0.0349296							0.135006						0.688107
0.0251517							0.0713907						0.675443
-0.0119574							0.221594						0.912234
-0.0666454								-0.0443453					2.12864
-0.0695126								0.146798					0.815164
0.0684294								0.357694					0.272316
0.172284								0.291112					1.07193
-0.0233195								0.0773495					1.33221
-0.0293724								0.185983					0.906913
-0.0198152								-0.00484231					0.560306
-0.0468939								0.169736					1.9821
-0.0870341								0.206371					0.671488
-0.071424								-0.0223638					1.92889
-0.0265053								-0.0726983					0.89417
-0.0863969								0.0235107					2.19076
-0.0765212								-0.0561325					0.0942338
-0.0666454								0.182797					0.859446
0.140427								0.0916853					0.860083
0.12864								0.152214					1.34368
-0.010258								0.0101306					1.10857
-0.0405225								-0.0526282					0.94992
0.0251035								0.135011					1.28219
-0.0609111								0.341128					0.937177
0.290793								-0.0723797					2.16241
0.238229								0.526537					0.723734
-0.0822555								0.315642					0.443071
-0.0879898								0.379038					0.412488
0.0400765								0.224849					0.547881
-0.0453011								0.147117					0.749219
-0.0475311								0.0251035					0.963938
-0.064734								0.356738					0.461548
0.0843581								0.221663					1.05983
-0.0787512								0.718318					0.285696
0.00016482								0.136965					1.09869
-0.0163172								0.0630711					1.54288
-0.028404								-0.00725208					0.637744
0.0141745								0.46743					0.457266
-0.0308763								-0.0509294					1.10638
0.00675762								0.152898					1.54563
-0.0415896								0.0669169					1.27203
0.00098892								0.00703232					1.37943
-0.0308763								0.201795					0.558905
0.0284589								0.282007					1.47421
-0.0226353								0.0663675					1.12396
-0.0525776								-0.0226353					1.80412
0.0616976								0.112792					1.0877
-0.0248329								-0.044886					0.858877
0.0290083								0.344089					1.88461
-0.0143943								0.0114275					0.724824
-0.0281293								0.00016482					0.557257
0.0166468								0.194103					1.24126
-0.0121967								0.0125263					1.23961
-0.00999908								0.298764					1.13852
-0.0327992								0.0240637					1.67199
-0.0110979								0.0279095					0.699826
0.0435674								-0.0187895					0.795696
0.0713122								0.415511					0.900632
0.012801								0.116363					0.445454
-0.0218112								0.0188444					0.460837
0.0243384								-0.00395568					0.620438
0.0328541								0.0328541					0.571266
-0.0113726								0.489955					0.525666
0.0471385								-0.0306016					0.574288
-0.173077								-0.190131					0.388496
-0.136938								-0.120696					1.3143
0.0409135								0.129433					0.734454
-0.0833391								0.599644					0.354387
-0.0536972								0.676794					0.587056
								0.0880158					1.48647
-0.0394853								0.0137078					1.51448
-0.169829								0.264649					0.373472
-0.108921								0.345454					0.594771
-0.15115								0.0319803					0.899312
0.090046								-0.166174					0.0725857
-0.0488245								-0.189319					0.727145
-0.0167462								-0.0943026					2.0858
-0.0305521								0.108725					0.858707
-0.0305521								-0.195004					0.95616
0.120906								0.399053					0.533457
1.29278								0.122936					0.342206
0.155827								0.258152					0.554166
0.426665								-0.107702					1.46779
-0.178356								0.195214					0.61548
0.00396253								0.842464					0.82744
0.0555314								-0.0622243					1.45885
-0.142217								0.0847673					1.07635
-0.0951147								0.285764					2.5552
-0.0922723								-0.180792					1.19411
-0.0614122								-0.0549153					1.65863
-0.194598								0.0425377					1.57539
-0.0991752								-0.0402974					1.06782
-0.145871								0.114815					0.915554
-0.134502								0.166384					1.20994
0.0220756									0.0965359				0.737324
-0.0416453									0.0120521				1.45651
0.00596637									0.435903				0.719067
-0.0423613									0.102264				0.759519
-0.0749377									0.168848				0.729449
0.0317411									0.258344				0.397957
-0.0219563									0.199277				0.601291
-0.0631242									0.159183				2.67437
0.00596637									-0.0330537				0.837917
0.0152739									0.103696				1.27645
-0.109304									0.0678973				0.757371
0.00775629									0.167416				2.53941
0.0106201									0.230063				0.54294
0.0976099									-0.0334117				1.7207
0.0804267									-0.00763696				0.719067
0.176008									0.130544				0.701526
-0.0910469									0.0167058				0.352493
0.0582318									0.158825				1.56963
0.0804267									0.0381848				0.929561
-0.067062									0.0636015				1.03015
0.00596637													0.0521461
-0.0126487													1.66879
0.0252974													0.83398
0.00525041									0.206437				0.941016
0.14021									0.169206				0.312757
-0.0498789									0.0689713				0.736608
-0.0924788									0.399031				0.536496
-0.0026252													1.09387
-0.00692099									0.135556				0.910946
-0.0928368									0.133766				1.86067
0.00833405									-0.0319472				1.44332
-0.0158953									0.181574				1.05413
-0.0334615									-0.0292214				1.05656
-0.0104437									0.0670902				0.557128
-0.0174096									0.00106525				0.79821
0.0752676									0.118275				0.909665
0.0825364									0.0740561				0.43689
-0.00741501									0.0840507				0.481109
0.00772832									0.246084				1.16862
0.0240831									-0.00287201				1.74467
									0.258502				1.5787
-0.00771788									-0.00650641				0.909059
-0.00771788									0.152801				0.722191
-0.0319472									0.168248				0.743997
0.00167099									-0.0131695				0.535625
-0.0277071									-0.025587				0.24457
0.0979826									-0.00923221				1.66108
0.0104541									-0.0443647				0.971147
-0.0531479									0.262742				1.62231
0.0804163									0.0610328				1.45089
-0.0286157									0.210043				0.802147
-0.0598109									0.0634558				1.0293
-0.0137752									-0.00408348				1.33459
-0.0440619									0.1949				1.38183
-0.0307357									0.269405				1.10623
-0.011958									0.00136812				0.645868
-0.0310386									0.0692102				0.455365
0.000156655									-0.000449078				1.14439
0.074359									0.161887				0.805782
-0.03013									0.00439679				1.20466
0.00705047									0.317294				2.03073
0.0519987									0.467685				0.662686
-0.00106048													1.32846
0.0357768									0.0854563				1.18314
-0.105827									0.248689				2.10948
-0.0260693									0.0638271				0.477824
-0.0808182									-0.012213				1.19125
0.0246242									0.126011				1.45046
-0.0237036									0.196306				0.668093
-0.0642583									0.0290176				0.93812
0.025976									0.0624753				0.272684
-0.102447									0.647478				1.28723
0.128715									0.0273278				2.15138
-0.0274211									0.134122				0.841465
0.0114439									0.211514				0.892496
-0.0771007									0.0759936				0.935754
0.0117819									0.314591				1.77591
0.378464									0.413274				0.714055
0.0986366									0.254435				1.41362
-0.0916328									0.122632				0.295665
-0.0625685									0.064503				0.590701
-0.0598649									0.0472673				0.841127
-0.0774386									0.0820768				0.9878
-0.0652722									0.358525				0.693102
									0.186505				1.26797
0.112155									0.339937				0.727573
0.0584198									-0.0892671				0.583604
-0.0865634									0.198334				0.838423
-0.0794664									-0.0291109				0.351428
0.0864702									0.0962709				0.497763
0.0737387										-0.0085429			0.633973
-0.0440634										0.164788			1.18634
-0.0334972										0.0712658			0.977263
-0.033722										-0.0175354			1.33472
0.024055										0.1803			1.09012
-0.0427145										-0.0173106			0.644539
0.0346212										0.100941			0.35453
										0.0728395			0.789094
-0.0589011										0.365321			1.01481
0.0114655										0.143656			1.99117
-0.0559785										0.202781			1.22613
-0.0260783										0.219867			0.712883
-0.00899253										0.0847546			0.903075
0.033722										0.119825			1.17195
0.0105662										0.283714			0.937696
0.0242798										0.129043			0.413881
										0.113081			1.42666
-0.0119151										0.123198			0.378136
0.103189										0.128144			0.877671
-0.0586762										0.0827312			0.815847
-0.00786846										0.123198			0.691301
0.0406912										0.227511
0.0370942										0.170184			1.4424
0.0209076										0.0508078			1.78367
-0.00876771										0.244372			1.32145
0.00876771										0.123647			1.25109
0.00584514										0.0611492			0.511225
-0.0105662										0.104763			1.03661
-0.0355205										0.189742			0.842825
0.00831809										0.259659			1.23895
-0.0659										0.000280763			1.27985
0.103205										0.00800533			1.02159
-0.0934579										0.0954809			0.265839
-0.0187175										-0.0738333			0.702799
0.338283										0.0681317			0.519288
-0.0218491										-0.00431222			1.55522
-0.0769649										0.213646			0.63975
0.00842288										-0.00786135			1.32598
-0.120807										0.253313			0.530353
0.148509										0.129511			1.40511
-0.104523										0.192769			0.730983
-0.0535824													1.69614
0.0140597										0.061451			1.21262
-0.0266508										0.0270036			0.457283
0.00591761										0.0900528			0.976082
-0.0400123										0.00236848			0.315318
-0.0510772										0.0341018			0.332855
0.0136422										0.0174001			1.60177
-0.0439789										0.102997			1.88257
-0.113918										0.129511			2.16608
-0.0700754										-0.0291561			0.340371
-0.0600544										0.1364			1.24686
-0.0736246										0.239951			0.822008
										0.262916			1.54436
-0.11016										0.127214			0.575448
0.0844159										-0.00493854			0.774199
-0.0381333										0.0610335			0.501751
0.428264										0.189637			1.48569
0.0716808										0.190055			1.80282
-0.032914										0.171891			0.289013
0.0329291										0.107956			0.957255
0.064926										0.175812			0.441442
-0.0103771										0.192638			1.44162
-0.0398916										0.117611			0.672316
-0.0434774										0.0726494			0.956979
-0.0443049										0.0285157			0.973529
0.0210681										0.205878			1.50231
0.0188615										0.0704427			0.550397
-0.0227897										0.0525134			0.490816
0.0285157										0.0971988			1.39142
0.0453417										0.0555476			1.03339
										0.141057			2.3243
-0.0175489										0.000104627			0.932705
-0.0500975										0.0403766			0.929671
0.0152756										0.0607885			0.929119
0.0232748										0.0425833			1.28495
0.080097										0.0803728			0.792581
0.000104627										0.0453417			0.658525
-0.0379607										0.059961			1.44521
-0.0545108										0.0765111			1.19227
-0.0393399										0.04479			1.05683
-0.00623959										0.134988			0.750378
0.0199648										0.0235507			1.05573
0.00644885										0.0737528			1.29571
-0.0192039										0.0751319			1.17875
0.00727636										0.0136206			0.766652
-0.0354782										0.0789936			1.05683
0.0191373										0.0823037			0.564189
0.00175964										0.00727636			0.980425
0.0362391										0.0163789			0.393722
-0.0531325											0.340172		0.436897
-0.0412075											0.250513		1.00532
0.0605967											0.216726		0.373297
0.0241592											0.203034		0.723759
-0.0467284											0.209659		0.756884
0.0650134											0.0935009		1.37809
-0.0425325											0.0634675		0.579334
-0.0173575											-0.0414284		0.556368
-0.0409867											0.248747		2.45289
0.0254842											0.171234		1.11419
-0.0526909											0.0848884		2.04434
0.0153258											0.0848884		0.953205
-0.0297242											0.0400592		1.00289
0.0343175											-0.0376742		1.48232
0.159972											0.121547		0.436455
0.0438134											0.222247		0.490118
-0.0641742											0.226443		1.24581
-0.0635117											0.170572		1.44588
0.0544134											0.0610384		0.576684
-0.0480534											0.0128967		0.674514
0.0619217											-0.040545		2.93695
0.0120133											0.0206258		0.908597
-0.0582117											-0.06307		0.494314
0.121988											0.0870967		0.841022
-0.03127											0.0661175		1.17006
0.020405											0.111168		0.999139
-0.0409867											-0.0476117		0.773668
-0.0566659											-0.0661617		1.10161
0.0120133											0.321622		0.417905
-0.0242033											0.0851092		0.627476
-0.0274037											0.0806107		1.46199
-0.0792106											0.0768102		0.129217
0.045006											0.0914122		1.15815
-0.00480064											0.134618		0.995333
-0.0220029											-0.0128017		0.67729
0.00760101											-0.0352047		0.834311
0.0260035											0.00260035		0.928924
-0.0508068											0.0960128		1.25697
0.0282038											0.114615		1.57221
0.0742099											-0.0322043		1.62602
											-0.00800107		0.571076
0.111015											0.0728097		0.622483
0.00440059											0.0286038		0.596079
0.0116015											-0.0104014		0.179824
-0.045206											0.137618		0.773303
0.0354047											0.0246033		1.80324
-0.0844113											0.235631		1.13495
-0.0392052											-0.00940125		1.41399
-0.037405											0.364449		0.628884
0.163222											0.0218029		2.00207
-0.0436058											0.0466062		1.26037
-0.0326043											0.112415		1.82964
-0.0254034											-0.0196026		0.7473
-0.0390052											0.0142019		0.608081
-0.0196026											0.209828		0.22643
-0.0354047											0.0326043		0.59868
-0.0102014											0.0808108		1.4716
0.0288038											0.0638085		0.584278
-0.00740099											0.0414055		0.539472
0.0682091											0.0952127		1.76784
-0.0287874											-0.00856484		2.56993
-0.0720874											-0.0295011		1.03516
0.139179											-0.000237912		1.69798
-0.0168918											0.0590022		0.737765
0.0130852											0.194136		1.06323
-0.0211742											0.0247429		0.898356
-0.0563852											0.0699462		1.01374
											-0.0456791		0.990904
0.00761319											0.0214121		0.339501
0.0145126											-0.0349731		0.755371
-0.0290253											0.0447275		1.02207
-0.0392555											0.00285495		0.845302
0.0102302											0.0635225		0.727773
-0.00832692											0.275264		1.15268
0.0259324											0.0556714		1.08678
0.0197467											0.000475824		0.772976
0.0342593											-0.0128473		1.27069
0.0720874											0.109915		1.07465
0.0402071											0.00523407		1.09796
0.0335456											0.0413967		1.03373
-0.00808901											0.142271		0.804381
-0.032594											0.0516269		0.801288
0.0197467											0.0915962		0.736814
0.0183192											-0.0259324		0.912155
-0.0309286													0.991855
0.0114198											0.246953		0.451319
-0.0145126											0.0770835		0.455602
-0.0019033											0.0240291		1.27616
-0.0430621											0.118004		1.17885
-0.056861											0.0535302		1.20502
0.00639659											0.149173		0.71407
-0.0597285											0.145124		1.10569
0.0215109											0.304094		1.09004
-0.092926											0.02394		1.00016
0.098162											0.187228		1.55183
-0.0165448											0.124882		0.642547
0.0471512											0.0153032		2.76368
0.00882567											0.483037		0.351057
0.0382446											0.149443		1.0617
-0.0505519											0.0517395		0.907047
0.0727916											0.540795		1.91674
0.227443											0.113546		0.637419
0.0965426											0.122453		0.972362
-0.068905											0.279264		1.23983
-0.0594586											0.134868		0.526491
-0.0348978											0.587488		1.60365
-0.068905											0.074141		0.279264
-0.0354376											0.10329		0.578581
-0.00493914											0.188848		1.83172
-0.037057											-0.0300397		1.33268
-0.0772719											-0.00331975		0.762382
0.0331165											0.0471512		0.313811
0.000188929											-0.0116866		0.565086
-0.037057											0.115705		0.983968
-0.0540606											-0.00574883		0.867372
-0.0537907											0.0255594		1.51351
0.257132											0.0482308		0.523792
-0.0856387											-0.00412944		0.584789
-0.0335484											0.111117		0.74079
-0.0367871											0.133249		1.03795
-0.0852264												0.183221	1.29686
-0.0562727												0.192336	1.24057
0.094751												0.703314	0.645407
-0.0303574												0.418424	1.49364
-0.0151657												0.751928	0.546571
-0.0330383												0.183042	0.879181
-0.0173104												0.541567	0.55801
-0.0666389												1.66647	0.63522
-0.00336974												0.567125	1.61696
-0.0602047												0.64362	0.724404
0.00520913												0.847368	0.908135
-0.077005												1.01197	1.0445
-0.00462082												0.384824	0.878645
-0.0907669												0.77409	0.386432
0.0170051												0.0938574	0.941199
-0.00229738												0.449344	0.982306
0.218787													1.08257
0.0359501													0.397156
-0.0757539													3.58152
-0.0930904													0.599832
0.204132													0.795001
0.0143242													0.370168
0.150692													1.04879
0.117092													1.71062
-0.0857626													2.40711
-0.0904095													0.173569
0.138182													1.42072
0.111551													1.331
-0.00908898													0.607338
-0.0164168													1.31635
0.0472098													0.389471
0.0373799													1.02484
-0.0017612													1.37961
0.0198647													1.19106
-0.0621707													1.19839
-0.0491237													0.589644
-0.0816519													0.568018
-0.0837966													0.944059
-0.0725368													0.407165
-0.0714645													2.23142
-0.0893371													1.97888
0.0548951													0.441301
0.039882													0.854874
-0.0653878													1.20732
0.0892105													0.520656
0.0493545													0.594649
-0.0494811													0.513328
0.0940361													0.345504
-0.013546												0.100029	1.50579
-0.0376122												0.143306	0.698729
-0.0179793												0.627374	1.77748
-0.019457												2.91345	0.756994
-0.0179793												0.510843	0.451311
-0.0464787												0.856636	0.490788
0.177083												0.0993961	0.958179
0.14014												-0.000246291	1.83976
0.00756466												0.391357	0.909624
0.0791299												0.30797	0.0801854
0.150906												0.123885	0.86677
-0.0403566												0.149006	1.70043
-0.00235736												0.240416	2.19358
-0.0310679												0.188483	0.921868
0.0105202												0.266382	0.315358
0.110163												-0.0285346	0.535121
0.00313142													1.47771
-0.0500675													0.313247
-0.0574563													0.642785
0.0472528													0.774516
-0.0219903													0.406557
-0.0173459													0.51781
-0.00826835													0.761427
-0.0420454													0.797949
-0.0228347													1.12284
0.00123146													1.96706
-0.0374011													0.318947
-0.0319123													1.26766
-0.0327567													2.32193
-0.0435232													1.33374
0.0478861													0.648274
-0.0466898													0.459967
-0.00700171													0.707806
-0.0496453													0.554754
-0.0428899													0.810193
0.0100979													0.704217
-0.011435													1.40931
0.01622													0.244215
0.0518971													0.521399
0.0130534													0.545043
-0.0443676													0.727228
-0.019457													2.42643
-0.000246291													1.40066
-0.0437343													0.563831
-0.0441565													2.00231
0.0713189													0.92208
-0.0124905													0.585786
-0.0230458													2.74034
-0.0292467												0.365735	1.16214
-0.015206												0.368267	1.25122
-0.0402952												0.186658	0.991584
-0.0313183												0.255481	0.422359
0.0494735												0.208985	0.386681
-0.0515738												0.374712	0.330749
-0.0232622												0.73839	0.902966
-0.0379934												0.220724	1.34191
0.0282973												0.017479	0.859693
-0.0195794												0.17561	0.446067
0.127964												0.442844	2.24236
0.0156376												0.133948	0.470696
-0.0393745												0.233845	0.299675
-0.0260243												0.361592	0.814118
0.0407268												0.42374	0.689133
0.0614426												-0.0253338	0.548265
-0.0363822													0.289547
-0.0474307													0.50269
0.0342819													0.945319
-0.0255639													1.67728
0.0973501													1.6736
-0.000704914													1.5539
-0.0154362													1.07698
-0.0366124													0.916086
-0.0446685													0.536986
-0.0370727													0.652074
0.139472													0.905268
-0.0375331													1.3159
0.14891													1.35825
0.0653556													0.926905
-0.04651													1.01437
-0.00830073													1.64413
-0.0522644													0.279419
0.0810076													2.06835
0.0651254													1.09654
-0.0170474													0.597523
-0.0379934													0.470926
-0.0274053													0.752892
-0.0389141													1.80871
0.0909052													1.54032
0.0225429													2.39681
-0.0218811													2.16088
-0.015206													0.364815
-0.047891													0.421438
-0.0442082													0.987211
-0.0451289													0.801229
-0.0366124													1.20243
-0.0338503													0.901585
-0.10553												0.201049	0.641057
0.119057												0.734762	0.691983
-0.0693718												0.606426	0.376237
-0.0138616												0.0375744	0.0803529
-0.100946												1.18597	0.612538
-0.0795571												0.163873	2.13881
0.0620192												0.0681305	0.482165
0.105307												-0.00978749	0.0895197
-0.0800664												0.151141	0.271328
-0.0174265												-0.0189543	-0.0551123
-0.0984001												0.314107	1.03065
-0.0617328												0.16591	0.628834
-0.00367628												0.158271	0.20054
0.0447041												0.420034	-0.00520408
-0.0571494												0.0421578	1.36778
-0.0708996												0.406793	0.447026
-0.107567													0.467906
-0.0943259													0.462813
-0.0408528													0.428183
-0.127428													0.205633
-0.0138616													2.65165
-0.128447													1.47269
-0.0871962													1.10296
-0.0658069													0.556009
-0.0230284													0.230587
-0.0749737													-0.0688625
-0.0958537													0.997544
-0.128447													0.273875
0.0553988													0.309014
0.0284076													1.24301
-0.0978908													0.340589
-0.116734													0.698604
-0.0770108													-0.0454362
0.0146574													0.84731
-0.109604													1.9239
0.315125													-0.128447
-0.0968722													2.23557
-0.0984001													0.749531
0.104288													0.54124
0.0391022													0.837634
0.439387													0.345172
0.151141													0.097668
0.0625285													3.20013
0.0762787													0.387951
0.116002													0.710317
-0.114697													0.000397865
0.15878													0.367071
-0.0673347													1.22519
-0.0347416													1.34945
0.211235													0.362487
-0.0596957													1.43857
-0.075483													1.60001
-0.0933074													0.119057
0.076788													1.96312
-0.0510382													0.588093
-0.0703903													1.51445
0.00650908													0.560592
-0.0647884													1.07139
-0.0978908													2.35983
-0.113678													0.265726
-0.0158987													1.23333
-0.0408528													0.480637
0.0233149													1.90302
0.0752602													2.6328
-0.0301582													1.94274
0.1104													0.0503061
-0.0958537													0.692493
0.185262													0.757679
-0.104002													3.45832
-0.0337231													1.45334
0.143502													1.12079
-0.0235377													0.764809
-0.0535845													0.434803
0.0905382													1.07444
-0.054603													0.426146
-0.122336													1.73598
0.0752602													0.925228
-0.0433991													0.862079
0.136372													1.05254
0.357904													0.126696
-0.0306675													2.21164
-0.00571335													1.06018
-0.0586772													1.58677
-0.106039													1.15847
0.19392													0.841199
0.280495													0.530545
0.140956													2.33081
0.244337													0.330913
-0.0922888													4.73302
0.234152													2.00131
-0.00265774													0.77754
-0.0342323													2.20909
-0.0744645													2.58035
-0.096363													0.488786
-0.121826													1.75839
-0.0515474													1.41412
0.0488504												1.23912	0.490453
0.131455												-0.0316629	0.530187
-0.0393308												0.0931152	2.20842
0.0028428												0.630567	1.34891
-0.000642625												0.49603	0.535415
-0.0595462												0.0178301	0.671695
0.0136476												0.295967	0.565738
0.0237553												0.30224	0.541689
0.0722027												0.51276	0.573755
-0.0511812												1.22344	0.650086
0.00319134												0.595016	1.22065
-0.0180697												0.0261951	-0.0494385
-0.0602433												0.265644	1.13491
-0.0456046												0.438869	0.713869
0.0268922												0.0363028	0.537506
-0.0306172												-0.00343096	0.880123
-0.0483929													1.06764
-0.0543181													4.71269
0.0526843													0.98852
0.123438													1.11539
0.0143447													-0.0302687
-0.0598948													1.4838
-0.0121445													0.781137
-0.0393308													-0.0672142
-0.0438618													0.658799
-0.0173726													0.712475
0.0464106													1.30674
0.00493405													3.23906
0.103223													0.706898
-0.0435133													1.07461
-0.0525754													0.624293
0.0139961													1.33706
0.0366514													2.43427
0.0474562													1.37714
0.00423697													0.205694
-0.0403764													0.716309
0.109845													2.2004
-0.0431648													0.162127
0.179902													0.836556
0.0812648													0.460827
0.00458551													0.348248
0.0422281													-0.00865909
-0.0473473													0.176068
-0.0605919													1.2088
-0.0752306													0.724325
-0.0745336													1.04847
0.00597968													0.162824
0.147836													0.694002
-0.0351483													0.780092
0.0830075													0.295618
-0.0651229													0.017133
-0.0706996													1.18823
-0.0508327													0.384845
-0.0501356													0.974927
-0.0647744													0.937284
-0.0306172													1.25376
-0.0686083													1.22274
-0.0135387													1.65249
0.00807093													1.13944
0.000403002													0.207088
-0.0633802													0.776258
0.0802191													1.23145
-0.0288745													0.729205
-0.0508327													0.772424
0.0268922													0.922645
0.0244524													0.32141
-0.0421191													0.612094
-0.0320114													0.758134
0.0244524													3.99888
-0.00238534													0.272963
-0.0501356													1.11853
0.0237553													1.07112
-0.028526													1.94875
0.264249													0.779743
-0.0131901													0.951226
-0.0131901													0.277494
0.00319134													1.23877
0.000751544													1.34612
0.195238													0.654965
0.0554727													1.10354
-0.0651229													1.64343
-0.0731394													0.850497
-0.074185													0.766847
-0.0637287													2.17635
0.0603522													0.325593
-0.057455													1.28443
-0.0358454													2.37084
0.0443193													1.59498
-0.0616375													1.49704
0.0809162													0.152019
-0.0585006													0.588394
-0.0288745													1.91843
-0.0191154													3.03307
0.0195728													0.761968
0.0359543													0.142608
-0.0435133													0.941118
-0.0776053												-0.012084	0.321822
0.0189966												-0.014604	0.342823
-0.0616449												-0.0700451	1.09464
0.00975644												-0.0381245	0.72839
0.0593174												-0.0704651	0.273522
-0.0448446												-0.00746389	0.285702
0.037477												-0.064165	0.479746
-0.0364445												-0.0217442	0.570887
-0.0351844												-0.00200379	0.612468
0.0538573												0.0416771	0.435645
0.038737												-0.0326644	1.03878
0.21052												0.00345632	1.26306
0.0446171												-0.0729852	0.383984
0.0496572												-0.066685	0.108458
-0.062905												-0.0276243	1.0476
0.0794778												0.1933	0.516706
-0.062065													0.384404
-0.0671051													0.525526
-0.0524048													0.296202
0.280242													0.293262
-0.00200379													2.69781
0.0870379													2.48444
-0.0431646													1.2513
0.00975644													0.600288
-0.0713051													0.311322
-0.0561848													0.328963
0.0278168													1.4592
0.091658													1.96195
-0.0528248													0.70823
0.0744377													0.584748
-0.0456846													0.430185
-0.0486247													0.985855
0.00807641													0.402044
-0.00494385													0.234881
-0.0582849													1.73725
-0.0687851													0.497386
-0.0179641													0.570887
-0.0595449													-0.0973456
-0.0213242													1.53565
-0.0238442													0.69395
-0.0427446													0.523426
-0.0469447													1.62259
-0.0528248													0.242861
-0.0272043													0.896394
0.090818													0.995096
-0.00914393													0.875393
-0.0553448													3.05062
0.144999													0.72335
-0.0696251													0.565007
0.142479													0.553667
0.0618374													2.09342
-0.0330844													-0.0746652
0.0798978													2.40338
-0.0288843													0.482266
-0.0784453													1.1526
0.00849641													0.822052
0.089978													2.96661
-0.0503047													1.19208
-0.0171241													0.921174
-0.0477847													1.32228
0.0769577													0.557027
-0.0204841													1.01316
-0.0717251													0.528466
-0.0444246													1.03248
0.036217													0.506206
-0.0335044													0.17608
-0.0830654													0.785511
-0.0343444													1.65745
-0.063325													0.527206
0.247481													0.72293
0.0693976													0.109718
-0.0377045													0.904374
-0.0234242													1.62007
-0.0704651													1.50877
0.0223567													1.18998
0.119379													1.0308
-0.0293043													0.498646
0.041257													2.66589
-0.0213242													0.404564
-0.00494385													2.2841
-0.0490447													0.19288
-0.00200379													0.527626
-0.0167041													0.69563
-0.00998394													0.544847
-0.0477847													1.68013
-0.0536648													4.11912
-0.0309844													1.71751
-0.0507247													4.5009
-0.0511447													1.51969
-0.0675251													0.1954
0.136179													1.3458
-0.0238442													1.38318
0.0593174													1.39326
0.0584774													0.540227
-0.0461046													1.65157
-0.0452646													0.556607
-0.0405422												0.439456	0.561451
0.0381273												0.109956	0.253613
0.0898136												0.864727	0.512045
-0.0184995												0.749573	1.30596
-0.0416823												0.261214	1.04145
0.0255858												0.39043	0.547009
-0.0344615												0.669384	0.325822
-0.030661												-0.00101741	0.945677
-0.0979291												0.263495	0.648861
-0.0869078												0.712329	0.835084
0.314421												0.615037	0.277556
-0.096409												0.72259	1.05779
-0.0264805												0.359646	1.41085
-0.0500433												0.197747	0.592994
-0.0458628												0.210668	0.72373
0.283637												0.324682	0.379789
-0.10667													1.44772
0.124778													0.329623
-0.0842475													0.284777
-0.0325612													0.565631
-0.0397821													0.658362
-0.0268605													0.689906
-0.0287608													1.19727
-0.115031													1.4671
-0.00101741													0.746153
-0.0158392													-0.122252
-0.0375018													0.759455
0.0537092													1.88895
0.0635904													1.271
0.108436													1.60126
-0.123392													0.378649
-0.0641051													0.291998
-0.00785824													0.120597
0.019125													0.051809
0.102355													0.312901
-0.0899482													0.80734
-0.0409222													1.73579
-0.0918484													0.253233
0.110716													0.0867732
0.0259659													1.02283
-0.0162193													0.780737
0.0229255													1.42225
-0.0492833													0.409052
-0.10135													0.716129
-0.0291408													1.00382
-0.0515635													0.587294
0.00772364													1.74719
-0.088808													1.54843
0.317461													0.55841
0.150241													1.16838
-0.118452													0.458078
-0.0891881													0.193566
-0.10097													0.230811
-0.0975491													1.13874
0.207628													0.328102
-0.0253404													0.690286
0.0331867													0.378649
-0.0603046													1.34016
-0.0667654													0.832043
-0.0736062													0.466439
-0.0971691													0.681165
0.165443													0.550809
-0.0234401													0.343304
-0.0853876													2.50387
0.219029													1.96876
0.0373672													0.467579
-0.047003													0.761355
0.0461083													0.587294
-0.0188796													0.303019
0.186725													0.202687
0.0301464													1.43936
0.119077													1.88629
0.0407876													1.05133
0.0278661													1.18397
0.0776521													0.325822
0.0947542													2.74215
-0.0656252													0.814181
0.0111441													1.1566
-0.109331													0.548149
0.0217853													3.33237
-0.00139746													2.24239
-0.000257323													2.15308
-0.0998294													3.91612
-0.0542239													3.72609
0.0620702													2.98044
-0.0709459													1.39261
-0.000257323													1.13874
-0.0299009													3.14614
-0.0527037													2.54073
-0.00899838													2.06491
-0.0264805													0.420074
-0.0515635													0.477461
-0.0283807													0.22397
0.195846													0.116797
-0.0663853													0.187865
-0.0527037													1.15736
-0.0826153												0.944863	0.700341
0.0919136												0.483089	0.60035
-0.0680712												1.13363	0.823966
-0.0689802												1.14242	1.11485
-0.0841303												0.0440394	0.945469
-0.0156519												0.339466	0.561566
-0.0623142												0.343708	1.33877
-0.0580722												0.0325253	0.787908
-0.028378												-0.0520121	0.935773
0.0704005												0.162513	0.844873
0.100095												0.224022	0.879112
0.0337373												0.0846416	2.88862
-0.0553451												-0.0795853	1.1809
-0.0117129												0.194025	0.440971
-0.0856453												0.415216	1.13909
0.0276773												-0.0535271	1.09909
0.0267683													1.10303
-0.021409													0.580655
0.127971													1.15696
0.145848													0.952741
0.0743396													0.747306
-0.0607992													0.799725
-0.0538301													1.25726
-0.0765553													0.910321
0.0107092													1.03304
-0.0129249													0.802755
0.0137392													1.61147
-0.0495881													0.815178
-0.0529211													0.826087
-0.0432251													0.859417
-0.0629202													0.72852
-0.0807973													0.679434
0.0897926													0.604895
0.0446454													1.13242
-0.0529211													2.43381
0.20766													0.116457
-0.0668592													0.39643
0.161301													2.20868
0.195237													2.31504
0.130092													0.3934
0.0558565													1.84781
0.0204053													2.08294
-0.0665562													1.57026
-0.0186819													0.946378
-0.0714042													0.534902
0.274321													0.670041
0.0967617													1.30483
0.00192217													1.50239
-0.0786763													0.0916106
-0.0744342													1.3318
0.0188903													1.06849
0.0210113													0.68913
-0.0768583													1.88296
-0.0529211													0.846388
-0.0686772													0.460667
-0.021106													0.271594
-0.0556481													1.87114
-0.108067													0.955468
-0.0632232													0.406732
0.205539													0.896989
0.241899													0.318256
0.0246473													0.381886
-0.0726162													-0.104431
0.00071016													0.324619
0.0246473													0.225537
0.0219203													1.19938
0.0349493													0.00616419
-0.0638292													1.01728
-0.0159549													1.70419
-0.00413787													0.86881
-0.0723132													0.300379
-0.102613													0.732459
-0.0641322													1.47996
-0.032014													1.14121
0.0785816													1.71843
-0.0701922													1.67601
0.204024													-0.0986744
-0.0444371													0.130395
-0.0659502													0.480665
-0.0626172													0.872143
-0.0726162													0.727308
-0.100795													0.666708
-0.101098													1.17242
0.0579775													-0.103825
-0.0850393													2.49714
0.139182													-0.10231
-0.0447401													0.819421
0.0585835													3.69127
-0.0471641													1.23059
-0.0904933													0.195237
-0.0517091													4.31606
0.127062													0.635802
0.0258593													-0.101704
-0.0532241													0.410065
-0.028681													1.05425
0.0716125													2.53774
-0.030508												1.25262	1.50057
0.114358												0.583852	0.413044
0.0783136												1.4255	1.2641
0.0222957												0.221573	0.937408
0.129051												0.17382	0.37126
-0.0752765												1.06069	1.86997
-0.0750469												1.01845	1.86721
0.0179337												0.213996	2.02011
-0.0716031												0.0454835	2.18564
0.0587992												0.109537	0.754202
-0.0587466												0.0103575	2.01392
-0.0617311												0.263586	1.04531
0.000944633												0.421997	2.00358
0.053978												0.507402	1.11396
-0.0550733												0.176575	1.47876
0.00645459												0.0112758	1.03705
-0.0128303													3.02017
-0.0674707													0.594643
-0.0355588													0.713566
-0.0406096													2.63172
0.0110462													0.787491
0.0551259													1.41264
0.0131125													0.531278
0.0328565													0.769813
-0.0649453													2.17279
-0.00272867													0.65663
0.171753													4.01403
-0.0626495													0.98011
-0.0383138													0.140989
-0.00226951													1.18604
-0.0706848													1.07034
0.0115054													2.13743
-0.031656													0.379295
0.090711													1.4558
-0.00341742													0.576506
0.0852011													1.00468
-0.0121415													1.68125
-0.0491042													0.51934
-0.0677003													0.478245
0.00668417													1.52789
0.0411214													0.353582
-0.0649453													0.384805
-0.0449717													0.978733
-0.04589													1.38486
-0.0635678													0.537018
-0.0394617													0.0728037
0.00347003													0.982865
-0.0128303													0.55217
-0.0325743													0.822617
0.00599543													0.395136
-0.0553029													0.362765
0.0351523													1.04233
0.0147195													0.765451
-0.00181035													0.512223
-0.00502449													0.505565
0.186676													0.506942
-0.0635678													1.6211
-0.0559916													0.946362
0.0569625													1.18031
-0.0119119													0.635279
-0.0126007													0.406386
0.11321													0.795986
-0.0635678													0.768895
0.0165562													0.951183
0.0599471													0.351057
-0.0394617													0.351286
-0.0500225													0.400417
0.00622501													0.408682
0.140989													1.07791
-0.0454308													0.752365
0.000255888													0.607729
0.0734924													0.333379
0.0252803													2.34268
-0.0440534													0.176804
0.0445651													1.37292
-0.00226951													1.65806
-0.0238502													1.08732
0.0138012													0.626095
-0.0706848													1.26456
-0.0472675													0.635738
-0.068389													0.821469
0.0206886													1.00835
0.106323													0.356796
-0.00203993													0.185069
-0.0663228													0.978044
0.211471													1.1399
-0.0550733													0.798511
0.0902519													1.76298
0.011735													1.19867
-0.0463492													0.262668
-0.0344109													1.29372
0.00806166													0.153846
-0.0667819													0.638493
-0.0100753													0.54643
0.00691375													0.827438
-0.0174219													0.796445
-0.018774												1.09555	0.287309
0.0265527												0.397315	0.754836
-0.0386363												-0.0111347	0.504775
-0.0320155												0.731918	1.04258
-0.0707215												0.247584	0.617328
-0.0564614												0.0347013	1.44085
-0.0345619												0.285781	0.653487
-0.0549335												0.0805373	0.162533
0.00974618												0.0377571	1.08333
-0.011644												1.29519	1.23662
-0.0345619												0.0591472	0.498154
-0.0330341												0.326015	1.03444
-0.0783608												0.693721	-0.0941487
-0.0264133												1.83096	2.31581
-0.0167368												-0.0829444	0.0413221
0.0117833												0.0143298	1.2738
0.011274													2.56536
-0.0442384													0.521072
-0.00655106													0.641264
0.00261614													1.16583
-0.0315062													2.87959
-0.0401641													0.757382
0.0163669													0.201239
-0.0330341													0.570473
-0.0376177													1.6247
-0.0371084													0.550102
0.00465329													1.06143
-0.0304876													0.924938
-0.0167368													1.61553
0.0555822													0.82359
-0.0315062													0.90966
-0.0661379													0.652978
-0.0406734													0.630569
0.0540543													0.833776
-0.0360898													0.332126
0.0138205													0.723769
-0.0253948													0.776735
0.0138205													1.43881
-0.0146997													0.706963
0.0469243													0.788958
0.0285899													0.0494707
-0.0335434													0.781319
-0.0600264													0.441114
-0.0253948													1.15768
0.0469243													3.27378
-0.00400462													1.61553
0.0815559													0.43704
0.0178948													2.40901
-0.041692													1.888
-0.0325248													0.977904
0.0581286													0.750252
-0.00655106													0.713583
-0.00858822													2.08357
-0.0411827													0.57302
0.0484521													0.662145
-0.0493313													0.0530357
-0.0564614													1.57123
-0.094658													0.375416
-0.0605357													1.81619
0.00108827													2.18288
-0.0050232													0.597975
-0.0208112													0.895399
0.0698423													0.347914
-0.0503499													0.638718
0.0087276													0.860768
0.0301177													0.653997
0.0927603													1.2738
-0.0340527													0.0448871
-0.0396548													0.842943
-0.0294691													1.00744
-0.00400462													0.233833
-0.0320155													1.88546
0.227722													2.65601
0.011274													1.53099
-0.0365991													1.57581
0.0250248													1.82638
0.100909													0.550611
0.139106													0.714093
-0.015209													1.1312
-0.0493313													1.70975
0.0774816													0.846508
-0.0309969													1.25903
0.019932													1.2901
-0.0279412													0.653487
-0.0401641													0.0158576
0.126883													1.12101
0.139615													1.01559
0.0978532													0.844471
0.0606751													1.59669
0.0642401													1.92875
													0.39375
0.0520172													0.924429
-0.0406734													0.425326
0.0285899													0.613253
0.0805373													0.259807
-0.0335434													1.47191
0.0129394												0.142238	0.962751
-0.0448647												0.205518	0.895211
0.00411663												0.479935	1.37864
0.0500556												-0.0104865	0.520398
0.0871719												0.141325	0.437038
0.0421456												-0.120923	-0.0384758
-0.100539												0.286139	0.251761
-0.0996264												0.0318017	0.963359
-0.100235												-0.141915	0.730926
0.0993411												0.358851	1.04489
0.274883												0.647262	3.3245
0.0254129												0.730926	0.811243
-0.158039												0.128547	0.249023
0.106034												0.276404	0.710543
-0.18116												0.67799	0.723929
-0.03087												0.239288	0.336033
0.132502													0.636614
-0.131571													0.211907
-0.116055													1.30014
-0.158952													2.42641
-0.0561212													0.429128
-0.0296531													0.413612
0.0406244													1.46838
-0.196372													0.302872
-0.137351													0.935066
-0.120618													0.703545
-0.0202219													0.15319
-0.10206													0.283401
0.0914311													0.781429
-0.118184													1.33452
-0.179031													0.370716
0.212515													0.28401
0.0722645													0.417567
0.158058													1.81247
-0.0223515													0.578506
0.0737857													0.403269
-0.1912													1.1176
0.485715													2.17785
-0.209454													0.849576
0.168402													0.320518
0.0047251													2.05586
-0.102973													1.70416
0.186351													0.34516
0.176008													1.06406
-0.190287													1.14225
0.00746318													1.32357
0.0168944													1.86388
-0.0835021													2.09084
-0.163819													1.35338
-0.0856317													0.597977
-0.0981052													0.876957
-0.0810682													0.802116
0.526178													1.22256
-0.02296													0.867526
-0.0539916													0.673426
-0.139785													2.28585
0.36098													1.86541
0.676469													0.783862
0.17692													0.546866
0.552038													1.17328
-0.141915													1.0379
-0.1912													0.159275
-0.117576													1.11487
-0.172338													1.42518
-0.0406054													0.772302
-0.154388													0.496059
-0.0959756													1.53166
0.0670926													0.58094
0.114553													1.84046
0.257542													1.90769
-0.0628143													1.6634
0.123984													0.786905
-0.0360419													0.713889
-0.178118													1.19427
0.0235875													0.327515
-0.214322													0.939325
-0.179639													1.14651
-0.0661609													0.285227
-0.0679863													0.671601
-0.184507													0.188785
0.557818													0.764696
-0.0591636													0.969748
-0.186028													0.8441
-0.0874571													0.350028
-0.0923248													1.10756
-0.0685947													1.03029
-0.0698117													3.849
0.0485345													0.611059
-0.0476027													0.754656
-0.145565													0.889127
-0.0174838													4.15536
0.0159817													0.454988
0.0181113													1.16811
0.339684													0.295571
-0.0695074													1.9941
-0.114534													0.324777

## Sheet: WAR
160805	4µM	Neg	Pos	Normalization	4µM	Neg	Pos	160922	4µM	Neg	Pos	Normalization	4µM	Neg	Pos	161109	4µM	Neg	Pos	Normalization	4µM	Neg	Pos
	5808	1269	4235		0.950851	0.0966581	0.654829		1671	509	4089		0.445857	0.00589393	1.36137		945	536	2956		0.179449	0.0553848	0.789455
	4445	737	4335		0.694349	-0.0034588	0.673648		1720	1697	4547		0.464409	0.455701	1.53478		3943	158	7549		1.08885	-0.0592758	2.18267
	2886	394	4002		0.400961	-0.0680079	0.610981		1727	857	6140		0.46706	0.137656	2.13793		758	422	3703		0.122725	0.0208046	1.01605
	4617	689	8606		0.726717	-0.0124919	1.47741		2019	537	2082		0.577618	0.0164954	0.601472		2091	464	3036		0.527071	0.0335447	0.813722
	1335	647	5255		0.109079	-0.0203959	0.846782		1094	667	4589		0.22739	0.0657167	1.55069		2436	351	4889		0.631721	-0.000732188	1.3758
	3283	695	6900		0.475672	-0.0113628	1.15635		2051	280	4021		0.589734	-0.0808113	1.33563		1100	429	7851		0.226466	0.0229279	2.27428
	2307	1032	4522		0.291999	0.0520572	0.708839		1718	816	3325		0.463652	0.122132	1.0721		846	295	4001		0.149419	-0.0177189	1.10644
	3019	641	6012		0.42599	-0.021525	0.989242		1193	141	2828		0.264874	-0.13344	0.883926		1336	910	1866		0.298053	0.168832	0.45882
	3406	571	4976		0.498819	-0.0346983	0.794277		1055	400	1843		0.212623	-0.0353762	0.51098		495	179	2314		0.042948	-0.0529058	0.594714
	1749	642	10452		0.186989	-0.0213368	1.8248		1278	646	3661		0.297057	0.0577656	1.19932		1297	196	2032		0.286223	-0.0477491	0.509174
	2228	281	13517		0.277132	-0.0892733	2.40161		1588	557	3492		0.414431	0.024068	1.13533		981		3334		0.190369		0.904116
	657	1014	5491		-0.018514	0.0486697	0.891195		651	826	2009		0.0596587	0.125918	0.573832		1397	291	3288		0.316556	-0.0189323	0.890162
	3306	1136	4553		0.480001	0.0716289	0.714673		2096	630	4488		0.606772	0.0517076	1.51244		705	289	2119		0.106648	-0.019539	0.535564
	4559	644	3831		0.715802	-0.0209604	0.5788		1681	325	3167		0.449643	-0.0637731	1.01228		2200	470	1935		0.560134	0.0353647	0.47975
	1598	1045	2909		0.158573	0.0545036	0.405289		1558	441	3744		0.403072	-0.0198526	1.23075		414	296	2703		0.0183779	-0.0174156	0.712712
	4113	1062	5182		0.63187	0.0577029	0.833044		1614	272	3040		0.424275	-0.0838403	0.964195		1375	518	1835		0.309883	0.0499247	0.449417
	4287	1028	2852		0.664615	0.0513044	0.394562		1606	440	2320		0.421246	-0.0202312	0.691584		1078	406	4985		0.219792	0.0159512	1.40492
	2595	1592	5600		0.346198	0.157443	0.911708		2647	304	3613		0.815395	-0.0717243	1.18115		1358	225	4471		0.304726	-0.0389524	1.24901
	3383	826	4989		0.494491	0.0132901	0.796724		1375	380	5085		0.333783	-0.0429487	1.73848		958	373	3097		0.183392	0.00594118	0.832225
	1696	492	12241		0.177015	-0.0495653	2.16148		994	608	1569		0.189527	0.0433778	0.407237		1349	388	3110		0.301996	0.0104912	0.836169
	1931	399	4368		0.22124	-0.0670669	0.679858		1326	207	3733		0.315231	-0.108451	1.22658		990	316	3261		0.193099	-0.0113489	0.881972
	3767	772	5875		0.566756	0.00312784	0.96346		1794	644	1834		0.492427	0.0570084	0.507573		1696	370	4740		0.407253	0.00503118	1.3306
	2349	293	7113		0.299903	-0.087015	1.19644		4742	263	2982		1.60861	-0.0872479	0.942234		1013	374	5909		0.200076	0.00624452	1.6852
	4384	620	7759		0.682869	-0.025477	1.31801		1153	159	4842		0.249729	-0.126625	1.64648		904	302	4548		0.167012	-0.0155956	1.27236
	2865	659	3548		0.397009	-0.0181376	0.525542		1757	192	982		0.478418	-0.11413	0.184984		811	226	3564		0.138802	-0.0386491	0.973883
		982	8141			0.0426477	1.3899		977	241	2319		0.183091	-0.0955777	0.691206		596	105	3947		0.0735849	-0.0753526	1.09006
	4750	557	5415		0.751746	-0.0373329	0.876893		1686	285	2034		0.451536	-0.0789181	0.583298		1225	674	2971		0.264383	0.097245	0.794005
	1927		5977		0.220487		0.982655		1803	408	1749		0.495835	-0.0323472	0.475389		637	202	2362		0.0860216	-0.0459291	0.609274
	4815	231	2201		0.763979	-0.0986828	0.272051			500	2211			0.00248631	0.650314		626	296	4112		0.0826849	-0.0174156	1.14011
	114	956	11218		-0.120701	0.0377547	1.96896		1722	571	1699		0.465166	0.0293687	0.456458		1000	188	3015		0.196132	-0.0501758	0.807352
N	29	29	30					N	29	30	30					N	30	29	30
Ave	3040.66	755.379	6069.17					Ave	1665.38	493.433	3134.57					Ave	1218.67	353.414	3650.1
Fold	4.02534							Fold	3.37508							Fold	3.44827

## Sheet: CLO
170119	4µM	Neg	Pos	Normalization	4µM	Neg	Pos	170126	4µM	Neg	Pos	Normalization	4µM	Neg	Pos	170202	4µM	Neg	Pos	Normalization	4µM	Neg	Pos
		586	2137			0.0580641	0.68975		1631	399	2238		0.521181	-0.145353	0.849578		406	158	4604		-0.0194034	-0.0918375	1.20672
	1395	440	1245		0.387551	-0.00139832	0.326459		862	716	5779		0.105138	0.0261492	2.76532			289	1572			-0.0535759	0.321154
	519	336	1621		0.0307765	-0.0437551	0.479595		2036	682	3386		0.740293	0.00775459	1.47067		686	584	5075		0.0623771	0.0325856	1.34429
	1056	952	2146		0.249484	0.207127	0.693416		722	1083	1716		0.0293953	0.224703	0.567167		1320	815	2730		0.247551	0.100055	0.659375
	1290	534	4353		0.344787	0.0368857	1.59228		1627	765	2793		0.519016	0.0526591	1.14984		1586	582	8270		0.325243	0.0320015	2.27746
	1020	596	6015		0.234822	0.0621368	2.26917		952	912	2100		0.153829	0.132189	0.774918		2043	559	4492		0.45872	0.0252838	1.17401
	545	376	2427		0.0413657	-0.027464	0.80786		1058	355	2882		0.211177	-0.169158	1.19799		794	340	3979		0.093921	-0.0386802	1.02417
	820	361	1707		0.153367	-0.0335732	0.514621		1051	569	1954		0.20739	-0.0533804	0.695929		318	369	2885		-0.0451058	-0.0302101	0.704646
	1189	336	1477		0.303652	-0.0437551	0.420948		1445	485	2082		0.420551	-0.0988259	0.76518		1559	498	4421		0.317357	0.00746734	1.15327
	804	272	1665		0.14685	-0.0698208	0.497516		2085	1222	2678		0.766803	0.299904	1.08763		916	645	7119		0.129554	0.0504021	1.94128
	654	366	3219		0.0857589	-0.0315368	1.13042		1345	1047	5182		0.366449	0.205226	2.44233		720	433	3020		0.0723076	-0.0115174	0.744076
	1055	483	2037		0.249077	0.0161146	0.649023		2330	794	2261		0.899352	0.0683486	0.862022		784	135	3289		0.0910003	-0.0985552	0.822643
	787	436	2058		0.139927	-0.00302742	0.657575		1280	191			0.331283	-0.257885			524	239	3120		0.0150612	-0.0681796	0.773283
	2508	253	5733		0.84085	-0.0775591	2.15432		1087	647	2651		0.226867	-0.011181	1.07302		731	248	7196		0.0755204	-0.0655509	1.96377
	1818	477	2074		0.559829	0.0136709	0.664092		791	1733	2645		0.0667255	0.576364	1.06977		933	299	2763		0.134519	-0.0506552	0.669013
	1160	376	1994		0.291841	-0.027464	0.63151		2251	390	872		0.856612	-0.150223	0.110548		1669	655	2800		0.349485	0.0533228	0.67982
	1042	502	1293		0.243782	0.0238528	0.346009			160	1459			-0.274657	0.428125		577	891	1940		0.0305411	0.122252	0.428637
	1520	285	1979		0.43846	-0.0645262	0.6254		588	376	1813		-0.0431011	-0.157797	0.619646		1250	488	2452		0.227106	0.00454661	0.578178
	842	611	2679		0.162327	0.068246	0.910494		2678	507	2968		1.08763	-0.0869235	1.24452		619	278	3368		0.0428082	-0.0567888	0.845717
	1871	199	3721		0.581415	-0.099552	1.33488		917	520	3413		0.134894	-0.0798903	1.48527		1006	348	1768		0.15584	-0.0363436	0.3784
	1131	407	4342		0.28003	-0.0148384	1.5878		1518	1135	2565		0.460046	0.252836	1.02649		1000	413	6675		0.154088	-0.0173589	1.8116
	1613	553	2629		0.476337	0.0446239	0.89013		917	741	3483		0.134894	0.0396746	1.52315		1131	973	4861		0.19235	0.146202	1.28178
	1001	708	2427		0.227084	0.107752	0.80786		2019	1063	880		0.731095	0.213882	0.114876		2845	1514	6360		0.692963	0.304214	1.7196
	3493	273	6256		1.24202	-0.0694135	2.36732		1570	513	2703		0.488178	-0.0836774	1.10115		821	176	1233		0.101807	-0.0865802	0.222141
	1235	391	3810		0.322387	-0.0213549	1.37112		1141	811	1738		0.256082	0.0775459	0.579069		943	520	2705		0.13744	0.0138929	0.652073
	1323	364	2790		0.358227	-0.0323513	0.955702		2375	379	2969		0.923698	-0.156174	1.24506		669	312	3525		0.0574118	-0.0468583	0.891573
	2912	530	4502		1.00539	0.0352566	1.65296		2607	502	1075		1.04921	-0.0896286	0.220375		1145	247	4910		0.196439	-0.065843	1.29609
	2382	254	5598		0.789533	-0.0771518	2.09933		3054	380	2356		1.29105	-0.155633	0.913418		1113	349	3690		0.187092	-0.0360516	0.939765
	1644	624	1139		0.488963	0.0735406	0.283288		834	273	2538		0.0899893	-0.213522	1.01188		1295	299	2708		0.24025	-0.0506552	0.652949
	1726	422	1890		0.522359	-0.0087293	0.589153		1802	680	1786		0.613695	0.00667255	0.605038		767	517	3357		0.086035	0.0130167	0.842504
N	29	30	30					N	29	30	29					N	29	30	30
Ave	1391.55	443.433	2898.77					Ave	1537	667.667	2516.03					Ave	1040.34	472.433	3896.23
Fold	3.13813							Fold	2.30205							Fold	2.2021

## Sheet: CPO
160811	2µM	Neg	Pos	Normalization	2µM	Neg	Pos	161109	2µM	Neg	Pos	Normalization	2µM	Neg	Pos	161116	2µM	Neg	Pos	Normalization	2µM	Neg	Pos
	560	387	3257		0.0420637	-0.00372292	0.755858		1221	241	4540		0.242507	-0.0296563	1.16425		2035	215	5376		0.550453	-0.0444546	1.64253
	373	190	2315		-0.00742819	-0.0558614	0.506546		1206	296	4428		0.238341	-0.0143818	1.13315		1852	294	4099		0.490635	-0.0186317	1.22512
	699	762	7168		0.0788517	0.0955254	1.79095		1109		5814		0.211403		1.51806		1006	114	2543		0.214101	-0.0774687	0.716504
	2200	633	4642		0.47611	0.061384	1.12242		1950	267	3337		0.444963	-0.0224356	0.830157		3419	613	4223		1.00284	0.0856405	1.26565
	1834	639	8188		0.379243	0.062972	2.06091		1170	600	5059		0.228343	0.0700443	1.30839		1338	466	1978		0.322623	0.0375903	0.531821
	1190	661	3740		0.208801	0.0687946	0.88369		1503	531	5291		0.320823	0.0508818	1.37282		1215	114	2611		0.282418	-0.0774687	0.738731
	1771	545	4817		0.36257	0.0380937	1.16873		1457	518	3838		0.308048	0.0472715	0.969294		2074	421	5958		0.563201	0.0228811	1.83277
	1486	461	2012		0.287141	0.0158621	0.426353		2046	482	9668		0.471624	0.0372737	2.58839		4397	167	4075		1.32252	-0.0601445	1.21727
	2771	442	2635		0.627232	0.0108335	0.591238		680	238	3885		0.0922617	-0.0304894	0.982346		562	408	1154		0.06897	0.0186317	0.262478
	1481	245	3701		0.285818	-0.041305	0.873368		1424	282	2202		0.298884	-0.0182698	0.514948		1891	448	2822		0.503383	0.0317066	0.807701
	1420	432	4135		0.269673	0.00818689	0.988231		2156	538	1642		0.502173	0.0528258	0.359426		1172	357	2837		0.268362	0.00196123	0.812604
	1114	198	6737		0.188687	-0.0537441	1.67688			387	5294			0.0108905	1.37365		1604	695	4365		0.409571	0.112444	1.31206
	2047	272	5314		0.435616	-0.0341591	1.30027			136	1549			-0.0588166	0.333598		679	165	7582		0.107214	-0.0607982	2.36361
	1497	190	3576		0.290052	-0.0558614	0.840285		1849	415	1117		0.416914	0.0186666	0.213624		3007	358	3801		0.868172	0.00228811	1.12771
	590	296	3334		0.0500035	-0.0278072	0.776237		719	66	5920		0.103093	-0.0782568	1.5475		1659	504	1508		0.427549	0.0500114	0.378191
	2138	216	4014		0.459701	-0.0489802	0.956207		1717	346	2235		0.380255	-0.000495924	0.524112		1725	368	2739		0.449122	0.00555683	0.780571
	1115	477	5470		0.188951	0.0200967	1.34156		890	388	5427		0.150582	0.0111682	1.41059		1609	125	2068		0.411205	-0.0738731	0.561239
	2059	327	2209		0.438792	-0.0196027	0.478492		1605	316	3124		0.34915	-0.00882745	0.771003		957	257	3954		0.198085	-0.030726	1.17772
	4269	320	3844		1.0237	-0.0214553	0.911215		904	292	3691		0.15447	-0.0154927	0.928469		948	144	2721		0.195143	-0.0676625	0.774687
	1436	193	2521		0.273908	-0.0550674	0.561066		2136		3814		0.496618		0.962628		1165	681	1511		0.266074	0.107868	0.379172
	1027	252	7269		0.165661	-0.0394523	1.81768		2164	147	2883		0.504395	-0.0557617	0.704073		958	633	3198		0.198411	0.0921779	0.930605
	1880	483	5079		0.391418	0.0216847	1.23807		938	231	3388		0.163913	-0.0324334	0.844321		2058	336	4059		0.557971	-0.00490308	1.21204
	936	583	3502		0.141577	0.0481509	0.8207		1055	409	4328		0.196406	0.0170003	1.10538		934	459	2083		0.190566	0.0353022	0.566143
	1549	343	5973		0.303815	-0.0153681	1.47468		998	411	5084		0.180576	0.0175557	1.31533		527	235	1295		0.0575295	-0.0379172	0.308567
	1414	619	1664		0.268085	0.0576787	0.334251		2659	257	4436		0.641865	-0.0252128	1.13537		990	388	1485		0.208871	0.0120943	0.370673
	995	181	1338		0.157192	-0.0582433	0.247971		953	474	2936		0.168079	0.0350519	0.718792		1070	595	5863		0.235021	0.0797568	1.80172
	1205	493	3134		0.212771	0.0243313	0.723304		1434	689	2867		0.301661	0.0947612	0.69963		265	289	4049		-0.028111	-0.0202661	1.20877
	1044	446	5293		0.17016	0.0118922	1.29471		1071	288	2354		0.200849	-0.0166035	0.557161		1251	382	5426		0.294185	0.010133	1.65888
	3249	478	4558		0.753741	0.0203614	1.10018		446	304	5823		0.0272758	-0.0121601	1.52056		1325	83	1791		0.318373	-0.0876017	0.470696
	1956	268	3945		0.411532	-0.0352177	0.937946		1311	189	2483		0.267501	-0.0440976	0.592986		850	216	5135		0.163109	-0.0441277	1.56376
N	30	30	30					N	28	28	30					N	30	30	30
Ave	1576.83	401.067	4179.47					Ave	1384.68	347.786	3948.57					Ave	1484.73	351	3410.3
Fold	3.9316							Fold	3.98141							Fold	4.23001

## Sheet: MIC
170208	2µM	Neg	Pos	Normalization	2µM	Neg	Pos	170216	2µM	Neg	Pos	Normalization	2µM	Neg	Pos	170224	2µM	Neg	Pos	Normalization	2µM	Neg	Pos
	1684	523	2513		0.721991	0.0634181	1.19224		847	135	3939		0.24626	-0.0901288	1.70709		622	359	4950		0.151597	-0.00425019	2.71626
	710	777	1768		0.169493	0.207499	0.769639		673	395	2422		0.164052	0.0327097	0.990378		781	557	1356		0.245816	0.11308	0.586547
	868	870	2977		0.259118	0.260252	1.45544		906	283	2136		0.274135	-0.0202054	0.855255		1164	368	1652		0.472772	0.00108298	0.761949
	1257	2030	1942		0.479777	0.918258	0.86834		322	410	1952		-0.00177958	0.0397965	0.768323		1409	474	2530		0.617953	0.0638959	1.28223
	775	860	3860		0.206364	0.25458	1.95632		1116	295	4041		0.37335	-0.0145359	1.75528		655	113	1842		0.171152	-0.150023	0.874538
	848	202	3686		0.247773	-0.118668	1.85762		587	167	3212		0.123421	-0.0750102	1.36362		903	962	2314		0.31811	0.353072	1.15423
	1333	185	979		0.522887	-0.128311	0.322082		482	228	3011		0.0738133	-0.0461904	1.26865		860	794	1178		0.29263	0.25352	0.481068
	1070	203	723		0.373702	-0.118101	0.176867		1163	301	2541		0.395556	-0.0117012	1.0466		879	338	1341		0.303889	-0.0166943	0.577658
	1186	416	2095		0.439502	0.00272278	0.955129		1246	482	1904		0.43477	0.0738133	0.745646		969	338	1612		0.35722	-0.0166943	0.738246
	1064	203	4156		0.370298	-0.118101	2.12422		947	572	2358		0.293505	0.116334	0.96014		615	290	3095		0.147449	-0.0451378	1.61703
	1261	206	1796		0.482046	-0.116399	0.785522		1114	185	2070		0.372405	-0.066506	0.824073		1063	286			0.412922	-0.0475081
	867	345	4468		0.258551	-0.0375517	2.3012		1082	739	2294		0.357287	0.195234	0.929903		1304	206	2103		0.555733	-0.0949141	1.0292
	994	125	2318		0.330591	-0.162346	1.08162		206	316	2070		-0.0565845	-0.00461432	0.824073		930	356	2039		0.33411	-0.00602791	0.991275
	187	100	2030		-0.127177	-0.176527	0.918258		373	233	2734		0.0223157	-0.0438282	1.13778		553	447	1271		0.110709	0.0478964	0.536178
	2427	141	1384		1.14345	-0.15327	0.551817		1704	181	1404		0.651154	-0.0683959	0.509418				2314				1.15423
	1919	324	2894		0.855294	-0.0494639	1.40836		951	196	2577		0.295395	-0.061309	1.06361		1118	340	758		0.445514	-0.0155091	0.232187
	529	633			0.0668216	0.125815			652	242	3246		0.154131	-0.039576	1.37968		241	482	1510		-0.074174	0.0686365	0.677803
	667	465	1702		0.145102	0.0305178	0.732201		565	490	3185		0.113027	0.077593	1.35086		614	625	2952		0.146856	0.153375	1.5323
	2204	111	2012		1.01696	-0.170287	0.908047		672	128	4874		0.16358	-0.093436	2.14884		269	244	2706		-0.0575819	-0.0723962	1.38652
	2368	395	1820		1.10999	-0.00918939	0.799136		1007	197	1850		0.321853	-0.0608366	0.720133		358	189	3145		-0.00484276	-0.104988	1.64666
	498	243	2505		0.049237	-0.0954108	1.1877		1245	438	2453		0.434297	0.0530253	1.00502		679	193	1961		0.185374	-0.102618	0.945054
	239	443	3482		-0.0976798	0.0180384	1.7419		992	252	2056		0.314766	-0.0348515	0.817459		900	344	1305		0.316333	-0.0131388	0.556325
		516	1895			0.0594474	0.84168		1198	199	1671		0.412092	-0.0598917	0.635563		481	115	1319		0.0680439	-0.148838	0.564621
	1674	468	1703		0.716318	0.0322196	0.732768		712	181	1784		0.182478	-0.0683959	0.688951		762	303	979		0.234557	-0.0374344	0.363146
	1775	148	1375		0.77361	-0.149299	0.546712		989	173	2291		0.313348	-0.0721755	0.928486		462	510	1803		0.056785	0.0852285	0.851427
	1605	394	1051		0.677178	-0.00975663	0.362924		776	890	2200		0.212715	0.266575	0.885492		797	509	1177		0.255297	0.084636	0.480476
	1700	147	1893		0.731067	-0.149866	0.840545		1346	400	997		0.482015	0.035072	0.317128		702	111	2891		0.199003	-0.151209	1.49615
	1157	131	1850		0.423052	-0.158942	0.816154		651	180	2044		0.153658	-0.0688683	0.811789		673	284	1611		0.181818	-0.0486933	0.737653
	610	582	812		0.112769	0.0968856	0.227352		768	446	2429		0.208936	0.0568049	0.993685		1283	224	1600		0.543289	-0.0842477	0.731135
	725	150	1360		0.178002	-0.148165	0.538203		418	439	1526		0.0435762	0.0534977	0.567057		927	258	4244		0.332332	-0.0641002	2.2979
N	29	30	29					N	30	30	30					N	29	29	29
Ave	1179.34	411.2	2174.1					Ave	857	325.767	2442.37					Ave	792.172	366.172	2053.72
Fold	2.86806							Fold	2.63072							Fold	2.16339

## Sheet: ZPT
161020	0.04µM	Neg	Pos	Normalization	0.04µM	Neg	Pos	161109	0.04µM	Neg	Pos	Normalization	0.04µM	Neg	Pos	170119	0.04µM	Neg	Pos	Normalization	0.04µM	Neg	Pos
	555	508			-0.00284327	-0.0138269			1414	545	2015		0.357978	0.0512203	0.570131		920	240	2090		0.192012	-0.080573	0.661019
	1408	422	5847		0.196497	-0.0339245	1.23386		158	275	2996		-0.0853908	-0.0440897	0.916424		1020	150	6171		0.232098	-0.11665	2.29693
	1234	601	6325		0.155835	0.00790663	1.34557		1463	231			0.375275	-0.0596218			1031	203	2103		0.236508	-0.0954048	0.66623
	1061	647	6060		0.115406	0.0186565	1.28364		1605	232	2655		0.425401	-0.0592688	0.796051		1304	202	2915		0.345943	-0.0958057	0.991729
	1138	504	13528		0.1334	-0.0147616	3.02886		846	489	6659		0.157473	0.0314523	2.20946		844	483	2213		0.161547	0.0168361	0.710325
	991	1443	6646		0.0990471	0.204677	1.42058		1081	425	3421		0.240429	0.00886031	1.06645		1235	400	3119		0.318283	-0.0164353	1.0735
	857	304	6152		0.0677322	-0.0615003	1.30514		601	264	2634		0.0709884	-0.0479727	0.788638		690	301	2839		0.0998143	-0.0561205	0.961264
	1310	594	2839		0.173595	0.00627078	0.530913		380	240	4502		-0.00702471	-0.0564448	1.44804		1165	529	3759		0.290223	0.0352757	1.33006
	2385	649	5439		0.424816	0.0191239	1.13852		952	300	1859		0.194891	-0.0352647	0.515063		865	151	8092		0.169965	-0.11625	3.06698
	1346	450	7722		0.182008	-0.0273811	1.67204		1143	318	3569		0.262315	-0.0289107	1.11869		738	312	2819		0.119056	-0.051711	0.953246
	3118	777	3046		0.596113	0.0490367	0.579287		932	341	3321		0.187831	-0.0207917	1.03115		1048	542	2452		0.243322	0.0404869	0.80613
	1971	295	5014		0.328067	-0.0636036	1.0392		1387	199	3343		0.348447	-0.0709178	1.03892		617	236	2268		0.0705515	-0.0821764	0.732372
	1677	463	5982		0.259361	-0.0243431	1.26541		1762	354	6382		0.480822	-0.0162027	2.11168		640	710	1874		0.0797712	0.107831	0.574433
	504	683	1611		-0.0147616	0.0270695	0.243937		547	172	5292		0.0519263	-0.0804488	1.72691		704	417	4381		0.105426	-0.00962065	1.57939
	2175	487	2551		0.37574	-0.0187344	0.463609		861	573	2878		0.162768	0.0611044	0.87477		499	350	3204		0.0232499	-0.0364783	1.10758
	1830	367	6824		0.295116	-0.0467776	1.46218		164	266	3515		-0.0832728	-0.0472667	1.09963		246	353	6678		-0.0781678	-0.0352757	2.50017
	3061	329	4277		0.582793	-0.055658	0.866964		248	300	4206		-0.0536207	-0.0352647	1.34355		2199	295	2304		0.704713	-0.0585256	0.746803
	2361	786	8335		0.419207	0.0511399	1.81529		1367	289	4278		0.341387	-0.0391477	1.36897		1118	448	2367		0.271383	0.00280602	0.772057
	1984	689	4605		0.331105	0.0284717	0.943615		1329	816	2588		0.327973	0.146883	0.7724		1276	528	1302		0.334719	0.0348749	0.345141
	1336	470	2982		0.179671	-0.0227072	0.564331		874	236	1018		0.167357	-0.0578568	0.218189		562	558	1556		0.0485041	0.0469007	0.446959
	2174	500	4147		0.375507	-0.0156964	0.836584		1401	712	2149		0.353389	0.110171	0.617433		929	561	2492		0.19562	0.0481033	0.822165
	1046	201	3856		0.1119	-0.0855708	0.768579		432	635	1823		0.0113313	0.0829904	0.502355		1399	705	4921		0.384024	0.105827	1.79586
	1915	391	3109		0.31498	-0.041169	0.59401		1943	777	1234		0.544715	0.133116	0.294438		1007	633	4362		0.226887	0.0769652	1.57177
	601	552	4826		0.00790663	-0.00354435	0.995262		1757	625	2998		0.479057	0.0794604	0.91713		1012	257	2754		0.228891	-0.0737583	0.92719
	2715	1574	1735		0.501935	0.23529	0.272915		871	468	1554		0.166298	0.0240393	0.407398		765	193	688		0.129879	-0.0994134	0.0990125
	2139	506	3830		0.367327	-0.0142943	0.762503		757	254	7148		0.126056	-0.0515027	2.38208		530	828	789		0.0356766	0.155133	0.139499
	2619	275	2273		0.4795	-0.0682775	0.398642		1381	405	3264		0.346329	0.0018003	1.01103		350	284	1067		-0.0364783	-0.0629351	0.250939
	458	923	2075		-0.0255115	0.0831559	0.352371		357	457	3297		-0.0151437	0.0201563	1.02268		311	563	1708		-0.0521119	0.048905	0.50789
	2603	162	3995		0.475761	-0.0946848	0.801062		1328	299	1323		0.32762	-0.0356177	0.325855		1738	1158	2588		0.519916	0.287417	0.860648
	658	463	4911		0.0212272	-0.0243431	1.01513		151	500	1829		-0.0878618	0.0353353	0.504473		1243	640	2194		0.32149	0.0797712	0.702708
N	30	30	29					N	30	30	29					N	30	30	30
Ave	1641	567.167	4846.28					Ave	983.067	399.9	3232.76					Ave	933.5	441	2935.63
Fold	2.89333							Fold	2.45828							Fold	2.11678

## Sheet: DHA
160811	4µM	Neg	Pos	Normalization	4µM	Neg	Pos	161109	4µM	Neg	Pos	Normalization	4µM	Neg	Pos	161106	4µM	Neg	Pos	Normalization	4µM	Neg	Pos
	1002	283	3429		0.195058	-0.0436327	1.00076		1111	356	1093		0.231218	-0.00832577	0.225507		1221	554	3021		0.260475	0.0554918	0.813651
	1081	280	3093		0.221284	-0.0446286	0.88922		871	962	3411		0.155071	0.183944	0.960953		417	520	2531		0.0133889	0.0450429	0.663064
	1505	364	4576		0.362042	-0.0167427	1.38154		631	610	6178		0.0789252	0.0722624	1.83886			348	3198			-0.00781618	0.868047
	414	517	3696		-0.000143856	0.0340497	1.0894			219	2539			-0.0517926	0.684288		1217	291	3836		0.259245	-0.0253334	1.06412
	1801	611	4703		0.460307	0.0652554	1.4237		852	458	4439		0.149043	0.0240364	1.28711		398	579	3310		0.00754984	0.0631748	0.902467
		335	3949			-0.02637	1.17339		848	240			0.147774	-0.0451298			628	706	1897		0.0782335	0.102205	0.468223
	791	828	3921		0.125011	0.137294	1.1641		518	174	7850		0.043073	-0.06607	2.36934			214	4457			-0.0489971	1.25496
	502	220	2674		0.02907	-0.0645472	0.750122		799	515	5316		0.132228	0.0421212	1.56536			142	4623			-0.0711242	1.30598
	1392	417	3299		0.324529	0.000852072	0.957607		1358	342	2363		0.309585	-0.0127676	0.628448		1257	581	4685		0.271538	0.0637895	1.32503
	1595	239	2628		0.39192	-0.0582396	0.734851		927	592	2745		0.172839	0.0665514	0.749647			276	7747			-0.0299432	2.26605
	1206	204	5321		0.262781	-0.0698588	1.62886		495	317	6734		0.0357756	-0.0206995	2.01526		2109	158	3626		0.533375	-0.0662071	0.99958
	1059	448	2301		0.213981	0.0111433	0.626295		870	331	6165		0.154754	-0.0162577	1.83473		651	273	5035		0.0853019	-0.0308652	1.43259
	734	264	2184		0.106088	-0.0499402	0.587454		578	344	3209		0.0621096	-0.0121331	0.896863		660	722	2620		0.0880678	0.107122	0.690416
	752	485	4679		0.112064	0.0234264	1.41573		379	250	1622		-0.00102841	-0.041957	0.393346		436	117	3221		0.019228	-0.0788072	0.875115
	352	712	1888		-0.0207264	0.098785	0.489189		816	703	4524		0.137621	0.101769	1.31408		1713	174	3335		0.411676	-0.0612899	0.91015
	1768	251	3174		0.449352	-0.0542559	0.91611		820	451	2875		0.13889	0.0218155	0.790893		1449	242	1305		0.330544	-0.0403921	0.286289
	848	1019	6172		0.143934	0.200702	1.91137		696	402	2259		0.0995482	0.00626894	0.595451			415	5637			0.0127743	1.6176
	1044	159	1614		0.209001	-0.0847977	0.398227		477	213	4106		0.0300647	-0.0536963	1.18146			335	2776			-0.0118113	0.738358
	332	502	5144		-0.0273659	0.02907	1.5701		871		1376		0.155071		0.315296		1233	706	3091		0.264162	0.102205	0.835164
	760	172	3236		0.11472	-0.080482	0.936692		389	507	1589		0.00214435	0.0395829	0.382876		1602	210	2734		0.377564	-0.0502264	0.72545
	1331	481	3630		0.304278	0.0220985	1.06749		776	267	2401		0.12493	-0.0365634	0.640504		743	485	4549		0.113575	0.0342867	1.28324
	374	734	2096		-0.0134229	0.106088	0.55824		1110	205	4048		0.230901	-0.0562345	1.16306		252	687	7393		-0.0373189	0.0963654	2.15726
	795	700	2392		0.126339	0.0948013	0.656505		1037	338	3430		0.207739	-0.0140367	0.966981		228	164	3494		-0.0446946	-0.0643631	0.959014
	838	148	2854		0.140614	-0.0884495	0.809877		388	205	6096		0.00182707	-0.0562345	1.81284		629	179	3615		0.0785408	-0.0597533	0.996199
	834	497	3498		0.139286	0.0274101	1.02367		902	425	5377		0.164907	0.0135663	1.58472			772	3132			0.122488	0.847764
	445	236	2705		0.0101474	-0.0592356	0.760413		619	391	944		0.0751179	0.0027789	0.178233			262	964			-0.0342457	0.181493
	2322	218	3425		0.633266	-0.0652111	0.999436		483	176	3316		0.0319683	-0.0654355	0.930812			144	3441			-0.0705095	0.942726
	1403	250	2986		0.32818	-0.0545879	0.853698		610	327	2064		0.0722624	-0.0175268	0.533582		1243	223	2466		0.267236	-0.0462312	0.643088
		743	3661			0.109076	1.07778		442	396	2046		0.01896	0.00436528	0.527871			573	2820			0.0613309	0.75188
	1287	116	3873		0.289671	-0.0990727	1.14816		756	369	2373		0.118585	-0.00420118	0.63162		678	151	4262		0.0935995	-0.0683583	1.19504
N	28	30	30					N	29	29	29					N	20	30	30
Ave	1020.25	414.433	3426.7					Ave	738.931	382.241	3534.07					Ave	938.2	373.433	3627.37
Fold	2.4618							Fold	1.93315							Fold	2.51236

## Sheet: CHL
161117	2µM	Neg	Pos	Normalization	2µM	Neg	Pos	161130	2µM	Neg	Pos	Normalization	2µM	Neg	Pos	161207	2µM	Neg	Pos	Normalization	2µM	Neg	Pos
	1013		3001		0.189134		0.795476		740	678	4480		0.0900472	0.0744408	1.03146			515	5120			0.0110149	1.36726
	410	1063	7306		0.0052177	0.204384	2.10851		1077	258	1899		0.174875	-0.0312799	0.381786		1431	805			0.280792	0.0964246
	789	197	2234		0.120813	-0.0597476	0.56154		410	207	6251		0.00698092	-0.0441174	1.47725		1147	597	3911		0.197149	0.0351652	1.01119
	670	182	5388		0.0845181	-0.0643226	1.52351		1857	453	2893		0.371214	0.0178047	0.631991		1356	412	3498		0.258703	-0.0193203	0.889556
	1157	172	2791		0.233054	-0.0673726	0.731426		1322	432	2827		0.236546	0.0125187	0.615378		732	654	5982		0.0749249	0.0519526	1.62113
	1042	484	4550		0.197979	0.0277878	1.26792			351	8135			-0.00787032	1.95149		1247	486	2300		0.226601	0.00247394	0.536726
	744	280	1493		0.107088	-0.0344325	0.335534		1042	432	3712		0.166065	0.0125187	0.838147		1108	585	3079		0.185663	0.031631	0.766154
	991	1029	3117		0.182423	0.194014	0.830856		1639	449	3238		0.31634	0.0167978	0.718833		675	259	4378		0.0581375	-0.0643812	1.14873
	732	409	4770		0.103428	0.0049127	1.33502		90	401	5271		-0.0735682	0.00471548	1.23057		1843	564	988		0.402132	0.0254462	0.150321
		296	4207			-0.0295525	1.16331			324	1744			-0.0146666	0.34277		1133	169	4151		0.193026	-0.0908877	1.08188
	1201	436	2963		0.246474	0.0131477	0.783886		1014	123	4374		0.159017	-0.0652615	1.00478		899	539	6732		0.124109	0.0180833	1.84202
	665	345	1274		0.0829931	-0.0146074	0.268739		1059	568	2092		0.170345	0.046752	0.430367		1365	201	5780		0.261354	-0.0814632	1.56164
	728	439	4744		0.102208	0.0140627	1.32709		905	330	3350		0.13158	-0.0131563	0.747026		911	176	2759		0.127643	-0.0888261	0.671909
	1044	108	2223		0.198589	-0.0868927	0.558185			474	3126			0.0230907	0.690641		1231	532	5377		0.221888	0.0160217	1.44295
	250	702	4961		-0.0435825	0.0942781	1.39328		499	334	3730		0.0293836	-0.0121495	0.842678		2194	358	4723		0.505507	-0.0352241	1.25034
	509	141	1410		0.0354128	-0.0768277	0.310219			157	5091			-0.0567032	1.18526		954	458	1902		0.140307	-0.00577252	0.419509
	658	723	3382		0.080858	0.100683	0.911682		492	521	3360		0.0276216	0.0349214	0.749543		1284	523			0.237498	0.013371
	758	269	1096		0.111358	-0.0377875	0.214449		921	339	5153		0.135608	-0.0108909	1.20087		1490	542	4092		0.298168	0.0189668	1.0645
	841	193	7592		0.136673	-0.0609676	2.19574		1311	910	5333		0.233777	0.132839	1.24618		670	350	2510		0.0566649	-0.0375803	0.598575
		257	5008			-0.0414475	1.40761		683	559	6631		0.0756994	0.0444866	1.57291		1652	466	5386		0.34588	-0.00341639	1.4456
	2070	502	3678		0.51152	0.0332778	1.00196			245	4536			-0.0345522	1.04556		1235	547	3642		0.223067	0.0204394	0.931967
	839	217	3946		0.136063	-0.0536476	1.0837		1021	220	10747		0.160779	-0.0408451	2.60897		1712	240	3090		0.363551	-0.069977	0.769394
	780	375	4918		0.118068	-0.00545735	1.38016		200	556	7242		-0.0458794	0.0437314	1.7267		1409	427	5279		0.274312	-0.0149025	1.41409
	561	350	4357		0.0512729	-0.0130824	1.20906		578	443	5208		0.0492692	0.0152875	1.21471		1695	352	4184		0.358544	-0.0369912	1.09159
	884		4060		0.149788		1.11847		482	348	4009		0.0251045	-0.00862546	0.912906		514	1054	2653		0.0107204	0.169759	0.64069
	466	177	4599		0.0222978	-0.0658476	1.28287		199	220	2217		-0.0461311	-0.0408451	0.461831			218	4834			-0.0764564	1.28303
	879	621	4064		0.148263	0.069573	1.11969		688	232	3713		0.0769579	-0.0378245	0.838398			940	2934			0.136184	0.723449
	522	263	2909		0.0393779	-0.0396175	0.767416			502	2268			0.0301388	0.474669		936	359	2814		0.135006	-0.0349296	0.688107
	1319	383	2612		0.282464	-0.00301733	0.676831		1061	129	4375		0.170848	-0.0637512	1.00503		720	563	2771		0.0713907	0.0251517	0.675443
	943	388	1494		0.167783	-0.00149233	0.335839			273	3645			-0.0275042	0.821282		1230	437	3575		0.221594	-0.0119574	0.912234
N	28	28	30					N	23	30	30					N	27	30	28
Ave	838.036	392.893	3671.57					Ave	838.696	382.267	4355					Ave	1213.81	477.6	3873
Fold	2.13299							Fold	2.19401							Fold	2.54149

## Sheet: CAL
160811	0.4µM	Neg	Pos	Normalization	0.4µM	Neg	Pos	161109	0.4µM	Neg	Pos	Normalization	0.4µM	Neg	Pos	161207	0.4µM	Neg	Pos	Normalization	0.4µM	Neg	Pos
	322	252	7143		-0.0443453	-0.0666454	2.12864		836	338	4337		0.136965	0.00016482	1.09869		209	251	1634		-0.190131	-0.173077	0.388496
	922	243	3020		0.146798	-0.0695126	0.815164		567	278	5954		0.0630711	-0.0163172	1.54288		380	340	3914		-0.120696	-0.136938	1.3143
	1584	676	1316		0.357694	0.0684294	0.272316		311	234	2659		-0.00725208	-0.028404	0.637744		996	778	2486		0.129433	0.0409135	0.734454
	1375	1002	3826		0.291112	0.172284	1.07193		2039	389	2002		0.46743	0.0141745	0.457266		2154	472	1550		0.599644	-0.0833391	0.354387
	704	388	4643		0.0773495	-0.0233195	1.33221		152	225	4365		-0.0509294	-0.0308763	1.10638		2344	545	2123		0.676794	-0.0536972	0.587056
	1045	369	3308		0.185983	-0.0293724	0.906913		894	362	5964		0.152898	0.00675762	1.54563		894		4338		0.0880158		1.48647
	446	399	2220		-0.00484231	-0.0198152	0.560306		581	186	4968		0.0669169	-0.0415896	1.27203		711	580	4407		0.0137078	-0.0394853	1.51448
	994	314	6683		0.169736	-0.0468939	1.9821		363	341	5359		0.00703232	0.00098892	1.37943		1329	259	1597		0.264649	-0.169829	0.373472
	1109	188	2569		0.206371	-0.0870341	0.671488		1072	225	2372		0.201795	-0.0308763	0.558905		1528	409	2142		0.345454	-0.108921	0.594771
	391	237	6516		-0.0223638	-0.071424	1.92889		1364	441	5704		0.282007	0.0284589	1.47421		756	305	2892		0.0319803	-0.15115	0.899312
	233	378	3268		-0.0726983	-0.0265053	0.89417		579	255	4429		0.0663675	-0.0226353	1.12396		268	899	856		-0.166174	0.090046	0.0725857
	535	190	7338		0.0235107	-0.0863969	2.19076		255	146	6905		-0.0226353	-0.0525776	1.80412		211	557	2468		-0.189319	-0.0488245	0.727145
	285	221	757		-0.0561325	-0.0765212	0.0942338		748	562	4297		0.112792	0.0616976	1.0877		445	636	5814		-0.0943026	-0.0167462	2.0858
	1035	252	3159		0.182797	-0.0666454	0.859446		174	247	3464		-0.044886	-0.0248329	0.858877		945	602	2792		0.108725	-0.0305521	0.858707
	749	902	3161		0.0916853	0.140427	0.860083		1590	443	7198		0.344089	0.0290083	1.88461		197	602	3032		-0.195004	-0.0305521	0.95616
	939	865	4679		0.152214	0.12864	1.34368		379	285	2976		0.0114275	-0.0143943	0.724824		1660	975	1991		0.399053	0.120906	0.533457
	493	429	3941		0.0101306	-0.010258	1.10857		338	235	2366		0.00016482	-0.0281293	0.557257		980	3861	1520		0.122936	1.29278	0.342206
	296	334	3443		-0.0526282	-0.0405225	0.94992		1044	398	4856		0.194103	0.0166468	1.24126		1313	1061	2042		0.258152	0.155827	0.554166
	885	540	4486		0.135011	0.0251035	1.28219		383	293	4850		0.0125263	-0.0121967	1.23961		412	1728	4292		-0.107702	0.426665	1.46779
	1532	270	3403		0.341128	-0.0609111	0.937177		1425	301	4482		0.298764	-0.00999908	1.13852		1158	238	2193		0.195214	-0.178356	0.61548
	234	1374	7249		-0.0723797	0.290793	2.16241		425	218	6424		0.0240637	-0.0327992	1.67199		2752	687	2715		0.842464	0.00396253	0.82744
	2114	1209	2733		0.526537	0.238229	0.723734		439	297	2885		0.0279095	-0.0110979	0.699826		524	814	4270		-0.0622243	0.0555314	1.45885
	1452	203	1852		0.315642	-0.0822555	0.443071		269	496	3234		-0.0187895	0.0435674	0.795696		886	327	3328		0.0847673	-0.142217	1.07635
	1651	185	1756		0.379038	-0.0879898	0.412488		1850	597	3616		0.415511	0.0713122	0.900632		1381	443	6970		0.285764	-0.0951147	2.5552
	1167	587	2181		0.224849	0.0400765	0.547881		761	384	1959		0.116363	0.012801	0.445454		232	450	3618		-0.180792	-0.0922723	1.19411
	923	319	2813		0.147117	-0.0453011	0.749219		406	258	2015		0.0188444	-0.0218112	0.460837		542	526	4762		-0.0549153	-0.0614122	1.65863
	540	312	3487		0.0251035	-0.0475311	0.963938		323	426	2596		-0.00395568	0.0243384	0.620438		782	198	4557		0.0425377	-0.194598	1.57539
	1581	258	1910		0.356738	-0.064734	0.461548		457	457	2417		0.0328541	0.0328541	0.571266		578	433	3307		-0.0402974	-0.0991752	1.06782
	1157	726	3788		0.221663	0.0843581	1.05983		2121	296	2251		0.489955	-0.0113726	0.525666		960	318	2932		0.114815	-0.145871	0.915554
	2716	214	1358		0.718318	-0.0787512	0.285696		226	509	2428		-0.0306016	0.0471385	0.574288		1087	346	3657		0.166384	-0.134502	1.20994
N	30	30	30					N	30	30	30					N	30	29	30
Ave	980.3	461.2	3600.2					Ave	745.7	337.4	3977.73					Ave	953.8	677.241	3139.97
Fold	2.12554							Fold	2.21014							Fold	1.40836

## Sheet: SUL
161110	20µM	Neg	Pos	Normalization	20µM	Neg	Pos	161116	20µM	Neg	Pos	Normalization	20µM	Neg	Pos	161207	20µM	Neg	Pos	Normalization	20µM	Neg	Pos
	717	509	2507		0.0965359	0.0220756	0.737324		245	378	5116		-0.0319472	0.00833405	1.44332		1463	545	6533		0.317294	0.00705047	2.03073
	481	331	4516		0.0120521	-0.0416453	1.45651		950	298	3831		0.181574	-0.0158953	1.05413		1908	678	2485		0.467685	0.0519987	0.662686
	1665	464	2456		0.435903	0.00596637	0.719067		254	240	3839		-0.0292214	-0.0334615	1.05656			521	4455			-0.00106048	1.32846
	733	329	2569		0.102264	-0.0423613	0.759519		572	316	2190		0.0670902	-0.0104437	0.557128		777	630	4025		0.0854563	0.0357768	1.18314
	919	238	2485		0.168848	-0.0749377	0.729449		354	293	2986		0.00106525	-0.0174096	0.79821		1260	211	6766		0.248689	-0.105827	2.10948
	1169	536	1559		0.258344	0.0317411	0.397957		741	599	3354		0.118275	0.0752676	0.909665		713	447	1938		0.0638271	-0.0260693	0.477824
	1004	386	2127		0.199277	-0.0219563	0.601291		595	623	1793		0.0740561	0.0825364	0.43689		488	285	4049		-0.012213	-0.0808182	1.19125
	892	271	7918		0.159183	-0.0631242	2.67437		628	326	1939		0.0840507	-0.00741501	0.481109		897	597	4816		0.126011	0.0246242	1.45046
	355	464	2788		-0.0330537	0.00596637	0.837917		1163	376	4209		0.246084	0.00772832	1.16862		1105	454	2501		0.196306	-0.0237036	0.668093
	737	490	4013		0.103696	0.0152739	1.27645		341	430	6111		-0.00287201	0.0240831	1.74467		610	334	3300		0.0290176	-0.0642583	0.93812
	637	142	2563		0.0678973	-0.109304	0.757371		1204		5563		0.258502		1.5787		709	601	1331		0.0624753	0.025976	0.272684
	915	469	7541		0.167416	0.00775629	2.53941		329	325	3352		-0.00650641	-0.00771788	0.909059		2440	221	4333		0.647478	-0.102447	1.28723
	1090	477	1964		0.230063	0.0106201	0.54294		855	325	2735		0.152801	-0.00771788	0.722191		605	905	6890		0.0273278	0.128715	2.15138
	354	720	5254		-0.0334117	0.0976099	1.7207		906	245	2807		0.168248	-0.0319472	0.743997		921	443	3014		0.134122	-0.0274211	0.841465
	426	672	2456		-0.00763696	0.0804267	0.719067		307	356	2119		-0.0131695	0.00167099	0.535625		1150	558	3165		0.211514	0.0114439	0.892496
	812	939	2407		0.130544	0.176008	0.701526		266	259	1158		-0.025587	-0.0277071	0.24457		749	296	3293		0.0759936	-0.0771007	0.935754
	494	193	1432		0.0167058	-0.0910469	0.352493		320	674	5835		-0.00923221	0.0979826	1.66108		1455	559	5779		0.314591	0.0117819	1.77591
	891	610	4832		0.158825	0.0582318	1.56963		204	385	3557		-0.0443647	0.0104541	0.971147		1747	1644	2637		0.413274	0.378464	0.714055
	554	672	3044		0.0381848	0.0804267	0.929561		1218	175	5707		0.262742	-0.0531479	1.62231		1277	816	4707		0.254435	0.0986366	1.41362
	625	260	3325		0.0636015	-0.067062	1.03015		552	616	5141		0.0610328	0.0804163	1.45089		887	253	1399		0.122632	-0.0916328	0.295665
		464	593			0.00596637	0.0521461		1044	256	2999		0.210043	-0.0286157	0.802147		715	339	2272		0.064503	-0.0625685	0.590701
		412	5109			-0.0126487	1.66879		560	153	3749		0.0634558	-0.0598109	1.0293		664	347	3013		0.0472673	-0.0598649	0.841127
		518	2777			0.0252974	0.83398		337	305	4757		-0.00408348	-0.0137752	1.33459		767	295	3447		0.0820768	-0.0774386	0.9878
	1024	462	3076		0.206437	0.00525041	0.941016		994	205	4913		0.1949	-0.0440619	1.38183		1585	331	2575		0.358525	-0.0652722	0.693102
	920	839	1321		0.169206	0.14021	0.312757		1240	249	4003		0.269405	-0.0307357	1.10623		1076		4276		0.186505		1.26797
	640	308	2505		0.0689713	-0.0498789	0.736608		355	311	2483		0.00136812	-0.011958	0.645868		1530	856	2677		0.339937	0.112155	0.727573
	1562	189	1946		0.399031	-0.0924788	0.536496		579	248	1854		0.0692102	-0.0310386	0.455365		260	697	2251		-0.0892671	0.0584198	0.583604
		440	3503			-0.0026252	1.09387		349	351	4129		-0.000449078	0.000156655	1.14439		1111	268	3005		0.198334	-0.0865634	0.838423
	826	428	2992		0.135556	-0.00692099	0.910946		885	596	3011		0.161887	0.074359	0.805782		438	289	1564		-0.0291109	-0.0794664	0.351428
	821	188	5645		0.133766	-0.0928368	1.86067		365	251	4328		0.00439679	-0.03013	1.20466		809	780	1997		0.0962709	0.0864702	0.497763
N	26	30	30					N	30	29	30					N	29	29	30
Ave	817.808	447.333	3240.77					Ave	623.733	350.483	3652.27					Ave	1038.48	524.138	3483.1
Fold	1.82818							Fold	1.77964							Fold	1.98132

[truncated: 3 more sheets: ART, COR, POS]
