# Supplementary material for: Large-scale phenotypic drug screen identifies neuroprotectants in zebrafish and mouse models of retinitis pigmentosa
Source: eLife. 2021 Jun 29;10:e57245. doi: 10.7554/eLife.57245 (PMC8425951; doi:10.7554/eLife.57245)
Supplement: Figure 3—figure supplement 1—source data 1. [file elife-57245-fig3-figsupp1-data1.xlsx]

## Sheet: VolQuantification
+Mtz	WAR4µM	MIC2µM	CLO4µM	CPO2µM	ZPT0.04µM	DHA4µM	CHL2µM	-Mtz
0.0531219	0.197733	0.416039	0.272043	0.285242	0.371774	0.074143	0.705145	0.990452
0.00631429	0.256921	0.361609	0.168897	0.228193	0.32762	0.0708519	0.394975	0.806706
-0.052101	0.178828	0.197449	0.232703	0.167258	0.110496	0.257958	0.360971	1.0006
-0.00670925	0.293399	0.225286	0.249363	0.317024	0.386452	0.116793	0.407111	0.885773
0.00181096	0.140664	0.208482	0.411331	0.310767	0.364125	0.14792	0.25209	0.958178
-0.0369211	0.154826	0.392769	0.430461	0.362137	0.398068	0.085088	0.192046	0.94368
-0.0211303	0.197454	0.322069	0.218033	0.173422		0.0981601	0.336272	1.21608
0.0556145	0.266482	0.27857	0.108671	0.295917			0.307159	1.19853
-0.0291713								0.919187
0.0106303								1.02367
0.0387697								1.06446
0.0443076								1.04617
-0.0645363								0.946511
