# Supplementary material for: Large-scale phenotypic drug screen identifies neuroprotectants in zebrafish and mouse models of retinitis pigmentosa
Source: eLife. 2021 Jun 29;10:e57245. doi: 10.7554/eLife.57245 (PMC8425951; doi:10.7554/eLife.57245)
Supplement: Figure 3—figure supplement 2—source data 1. [file elife-57245-fig3-figsupp2-data1.xlsx]

## Sheet: Quantification
+MTZ	ZPT	DHA	WAR	CPO	CLO	MIC	CHL	-MTZ
-0.0604676	0.173609	0.127808	-0.07164	-0.02485	0.45429	0.443032	0.31922	1.82793
-0.0142254	0.258762	0.179667	0.360363	0.363946	-0.01012	-0.1551	0.368433	0.947338
-0.0721022	0.52585	-0.35082	0.022334	0.355131	0.533008	0.28448	0.185861	0.514959
0.0132509	0.143169	0.372182	0.189366	0.190413	-0.05124	0.376093	-0.0127	0.710527
0.033655	0.003951	-0.11381	0.240657	0.133025	0.258554	-0.01154	0.327675	0.807911
-0.0472907	0.928221	-0.13586	-0.05447	-0.10055	0.369563	0.014587	-0.01386	0.765546
-0.143094	0.301856	0.018184	0.858758	0.277011	0.147248	0.02189	0.540226	1.15775
0.0869942	1.23928	-0.05992	0.215212	0.400359	0.856106	0.362872	0.237862	1.6124
-0.0166634	0.717196	-0.14923	1.10354	-0.01131	0.985883	0.143313	0.593258	0.806103
0.124341	0.363023	0.097555	0.413631		0.011756	0.014384		0.749978
0.15383	0.16224							0.774987
0.083602								1.06808
-0.127847								1.41692
-0.0486632								0.661421
-0.0688677								1.30137
0.0531204								1.31299
0.0422533								0.663596
0.0155349								1.21381
-0.0209575								0.68284
