# Supplementary material for: Large-scale phenotypic drug screen identifies neuroprotectants in zebrafish and mouse models of retinitis pigmentosa
Source: eLife. 2021 Jun 29;10:e57245. doi: 10.7554/eLife.57245 (PMC8425951; doi:10.7554/eLife.57245)
Supplement: Figure 4—figure supplement 1—source data 1. [file elife-57245-fig4-figsupp1-data1.xlsx]

## Sheet: Tunicamycin
DMSO	WAR 3.3 µM	CLO 0.37 µM	CPO 0.04 µM	MIC 1.1 µM	ZPT 1.1 µM	DHA 0.12 µM	CHL 3.3 µM	CAL 0.04 µM	SUL 0.12 µM	ART 10 µM	COR 3.3 µM	POS
1.04751	1.15077		1.11336		1.474	1.10438	1.33633	0.776655		1.24205	1.41713
1.08492	1.40067		1.35279		1.37972	1.2226		0.77067		1.12533	1.23756
1.23756	0.933782		0.824542		1.36775	1.03404	1.16573	0.618032		1.22409	1.33932
0.957725	1.26599		1.1792		1.39918	1.35279	0.784138	0.571642		1.23008	1.26599
1.23457	1.04452		0.83801		1.03105	1.14628	1.04003	0.686869		1.0939	1.02806
1.04901	1.08792		1.18519		0.99364	1.10887	0.519267	0.561167		0.995137	0.733259
0.872428
0.933782
1.27198
1.03704
1.08492
0.965208
0.981669
0.83801
0.90535
0.670408
1.26749
0.90086
1.1777
0.959222
1.10288
1.11785
1.11036
1.05051
1.00262
1.08941
0.914328
0.891882
0.81257
0.893378
0.752712
0.784138
1.90878		2.12473		2.52932					1.59106
1.21129		2.2811		2.06764					2.24387
1.09711		1.95842		1.91623					2.06764
0.702451		1.54639		1.91871					1.89389
0.834006				1.82439
0.687558				2.26125
1.05988				2.31585
0.58579				2.88923
0.871238
0.481539
0.685076
0.49395
0.662737
0.419485
0.516289
0.675147
0.898542
1.64071
1.2237
1.4471
1.31803
1.55631
0.831523
1.17654
1.49674
1.51908
1.58114
1.58362
1.42972
0.863791
1.06733
1.19144
0.948185
1.22619
0.910953
1.40738
0.702451
1.09215
1.00527
1.12442
0.848899
0.526218
0.486503
0.590754
1.47192
0.496432
1.02017
0.424449
1.81244		2.30997		2.38993					4.34452			3.05627
0.0266535		1.48371		1.38598					2.36328			4.19348
1.4926		2.15005		2.97631					3.50938			4.1846
1.24383												3.74926
0.719645												4.00691
1.10168												3.50049
												0.106614
												2.84304
1.04837												3.12734
1.06614
0.488648
1.06494	0.668831		0.850649		1.27273	0.372727	0.967532	0.909091		0.675325	1.05195	1.0974
1.03896	0.32013		0.635065		0.485065	0.545455	1.1039	0.59026		0.902597	1.24026	0.954545
0.954545	0.75974		1.19481		1.06494	1.04545	1.12987	1		1.08442	0.948052	1.24026
0.688312	1.35714		1.07792		1.44156	0.792208	0.707792	0.837662		1.19481	1.07792	1
1.19481	1.16234		1.01299		1.06494	1.07792	0.844156	0.714286		1.05844	0.844156	1.04545
1.20779	1.14286		0.954545		1.01948	0.993506	1.01948	0.980519		1.04545	0.941558	1.15584
0.896104												1.03247
0.954545												1.6039
												1.62338
												2.11039
												1.07792
												1.0974
												0.987013
												1.12987
												1.23377
												1.18182
