# Supplementary material for: Large-scale phenotypic drug screen identifies neuroprotectants in zebrafish and mouse models of retinitis pigmentosa
Source: eLife. 2021 Jun 29;10:e57245. doi: 10.7554/eLife.57245 (PMC8425951; doi:10.7554/eLife.57245)
Supplement: Figure 4—figure supplement 2—source data 1. [file elife-57245-fig4-figsupp2-data1.xlsx]

## Sheet: Thapsigargin
DMSO	POS	WAR	CPO	DHA	ART	ZPT	CAL	COR	57D	SUL	MIC	CLO	WAR+CPO	WAR+DHA	WAR+ART	WAR+ZPT	WAR+CAL	WAR+COR	WAR+57D	WAR+SUL	WAR+MIC	WAR+CLO	CPO+DHA	CPO+ART	COP+ZPT	CPO+CAL	COP+COR	CPO+57D	CPO+SUL	CPO+MIC	CPO+CLO	DAH+ART	DHA+ZPT	DHA+CAL	DHA+COR	DHA+57D	DAH+SUL	DAH+MIC	DHA+CLO	ART+ZPT	ART+CAL	ART+COR	ART+57D	ART+SUL	ART+MIC	ART+CLO	ZPT+CAL	ZPT+COR	ZPT+57D
1.16194		1.70978	1.08242	1.40051	1.44469	1.48887	1.44028	1.58165	1.13101	1.64351	1.80255	1.33866	1.48446	1.34308	1.76279	1.73628	1.4712	1.70536	1.84232	1.59933	2.51386	1.30332	1.00289	0.945457	1.18845	1.93068	1.52864	1.68327	0.976384	1.7407	1.08242	1.57282	1.49771	1.30332	1.44028	1.4226	1.40493	2.07205	1.41377	0.980802	1.51538	1.31657	1.62583	1.28565	1.49771	1.3475	1.32541	1.22379	1.52422
0.901277		1.67885	1.74954	1.66118	1.55514	1.24147	1.40493	1.62142	1.46237	1.58165	2.44317	0.910113	1.70536	1.41819	1.67001	1.82464	1.31657	1.67001	1.75396	1.85557	2.08089	1.53305	1.58607	1.33866	1.48446	1.29448	1.28123	1.30774	1.44028	2.90264	1.56398	1.73187	1.31215	1.25472	1.65234	1.48004	1.49329	1.74954	1.10451	1.37842	1.58165	1.45795	1.50655	1.617	1.35633	1.21054	1.17078	1.53305	1.25914
1.14869		1.67001	1.11334	1.11776	1.32099	1.59049	1.617	1.58165	1.43586	1.36075	1.94835	1.42702	1.43144	1.17078	0.941039	1.06474	1.25472	0.795245	0.698048	0.764318		0.578761	1.15752	0.998474	1.24147	1.078	1.00731	0.786409	0.967548	1.57724	1.08242	1.31215	1.41377	1.10892	1.35192	0.949875	1.5684	1.34308	1.20612	1.33424	1.03382	1.55073	1.08242	1.36517	1.69652	1.31215	1.36075	1.48004	1.25914
0.883605		1.5684	1.40051	1.21938	1.35633	0.910113	0.949875	1.14427	0.98522	1.22821	1.57724	0.892441	1.24147	1.60374	1.22379	1.36517	1.17519	1.70978	1.31215	1.72745	1.97928	1.51538	1.51096	1.33424	1.43586	1.30774	1.68769	1.38284	1.68327	1.84673	1.46237	1.49771	1.59049	1.31657	1.49329	1.19287	1.51538	1.85999	1.50213	1.87324	1.29448	1.65676	1.18845	1.46237	1.82464	1.17961	1.24588	1.5198	1.37401
0.773154		0.724556	0.883605	1.16194	1.23263	0.905695	1.09125	1.59049	2.59338	0.971966	1.92184	1.48446
1.01173		1.33424	1.18845	1.26356	1.24147	1.06474	1.09125	1.078	1.27239	0.865933	1.68769	0.733392
1.16194		0.755482	0.62736	1.01615	1.16194	1.0294	1.24588	1.25914	1.22379	1.04707	1.36517	0.914531
1.41377		0.945457	1.03382	0.954294	1.0294	0.733392	0.808499	0.905695	0.724556	1.05591	1.06033	0.653868
1.16194
1.06916
1.28565
1.70536
1.0294
1.22379
1.16194
1.17961
1.05149
0.945457
1.12218
1.07358
1.11334
1.18845
0.689212
0.949875
1.05149
0.989638
1.06033
1.02498
1.14869
1.08242
0.755482
0.870351
0.96313
1.05591
1.6656
1.18845
0.874769
1.03382
0.826171
0.636196
0.786409
0.764318
0.905695
0.799663
0.949875
0.764318
0.73781
0.843843
0.720138
0.918949
0.883605
0.830589
0.967548
0.724556
0.768736
2.02225	3.10209	1.61649	2.13351	2.75524	3.48168	3.08246		3.6911	3.48822	2.9712	3.91361	2.85995	2.06152		2.48037		1.62304	2.04843	2.27094	2.1466	2.6767	1.74084	2.41492	2.68325	1.87827	2.39529	1.6623	2.27749	2.1466	2.00916	2.05497	3.06937	2.78796	3.01702	2.88613	2.86649	3.16754	2.74869	2.01571		2.77487	1.91754	2.52618	2.33639	3.29843	2.40183	2.12696	2.46728	3.08901
0.798429	2.93194	1.24696	0.931174	1.417	0.769231	0.890688	1.34413	1.4413	1.80567	1.4332	1.57895		1.11741	1.04453	1.21457	1.4332		1.63563	1.00405	0.955466				1.62753	1.68421	1.4413	0.769231	1.34413	0.850202	1.65182	1.9919	1.01215	0.591093	1.00405	1.25506	1.03644	1.10931	1.10931	1.10121	1.16599	0.931174	1.65992	1.10931	1.35223	1.36032	0.866397	1.19028	1.37652	1.1336
2.68325	3.29188		1.90892	1.96933	2.07807	2.4526	1.66729	2.15056	1.98141	2.83922	3.23792	1.35316	0.869888	0.845725	1.23234	1.54647	0.688662	0.930297	1.12361	1.0632	1.41357	0.749071	0.990706	1.34108	1.24442	1.00279	1.07528	1.24442	1.23234	1.24442	1.00279	1.05112	2.09015	1.35316	1.40149	1.67937	1.76394	2.15056	1.34108	1.6552	2.06599	1.49814	1.14777	2.12639	2.02974	1.51022	1.26859	1.48606	2.53717
0.831152	2.63743	1.00785	1.59686	1.29581	2.17277	3.01047	2.36911	1.85864	1.31545	0.890052	1.49215	0.824607	2.05497	1.71466	2.10733	2.03534	2.36911	1.97644	1.56414	0.994764	0.065445	1.35471	1.46597	1.76047	1.63613	1.52487	1.00785	1.28272	1.40707	2.15314	1.72775	2.13351	2.30366	2.95157	1.44634	1.34817	0.935864	1.51832	0.713351	2.65707	2.27749	0.746073	1.3678	1.1911	2.63743	1.94372	3.56021	1.41361	0.602094
0.831152	2.09424	0.955466	1.23077		1.02024	0.842105	0.987854	1.09312	1.04453	1.45749	1.09312	0.744939	0.882591	0.947368	1.27935	0.987854	1.31174	1.11741	1.21457	1.60324	1.4413		1.417	0.979757	0.923077	1.417	1.1417	1.33603	1.80567	1.35223	1.18219	1.20648		0.947368	0.91498	1.01215	1.1498	1.11741	1.03644	1.30364	0.955466	0.987854	0.947368	1.18219	1.67611	0.631579	0.8583	1.02834	0.963563
1.12565	2.59817	0.640335	1.1961	0.797398	3.06877	1.34108	2.62175	1.08736	1.08736	1.93309	1.80019	1.28067	0.954461	0.906134	0.88197	1.08736	1.73978	0.80948	1.11152	0.797398	1.4619	1.07528	1.5223	0.918216	1.29275	2.11431	1.05112	1.07528	1.00279	1.64312	1.88476	1.0632	1.08736	1.5948	1.15985	1.12361	1.17193	1.07528	1.329	1.77602	1.38941	0.978625	1.12361	1.15985	1.69145	0.990706	1.29275	1.15985	1.34108
0.719895	2.10733	1.7212	1.6034		1.62304	2.14005	2.33639	3.0301	3.12173	3.39005	3.12173	2.85995	1.39398	2.10079	1.98953	1.79319	2.42801	2.82068	2.37565	1.71466		1.68194	2.45419	2.91885	2.52618	2.90576	2.34948	2.66361	2.94503	3.9267	1.6623	2.89921	3.03665	2.80759	3.11518	3.08901	3.24607	3.59293	2.76832	3.82199	3.61911	3.75	3.05628	3.6911	5.15052	2.57853	3.63874		2.53927
	2.39529	1.10121	1.57085	0.761134	0.882591	0.623482	1.7004	1.32794	0.809717	1.55466	1.80567	1.55466	1.25506	0.931174	1.16599	1.32794	1.83806	1.07692	0.995951	0.761134	1.67611		1.05263	0.720648	1.83806	1.57895	1.31174	1.68421	0.526316	2.2996	0.477733	1.20648	1.25506	1.48178	1.35223	0.59919	1.61134	0.874494	0.59919	1.37652	0.607287	0.477733	1.4332	0.566802	0.91498	1.10121	1.67611	1.37652	1.4413
0.301047		1.14777	1.24442	1.5948	1.60688	1.18401	1.03903	1.22026	1.43773	1.14777	2.22305	1.11152	1.30483	0.833643	0.906134	0.724907	1.49814	0.857807	1.15985	0.120818	1.96933	1.58271	1.88476	1.43773	1.54647	2.15056	1.38941	1.09944	1.5223	0.0966543	2.22305	2.15056	2.46468	2.0539	2.24721	2.36803	0.845725	2.62175	3.12918	1.18401	2.54926	1.51022	2.88755	1.43773	2.69424	1.5948	1.37732	3.31041	3.09294
	2.08097	1.45288	2.14005	0.909686		0.438482		0.59555	1.43979	0.543194	1.32199		1.21073	2.31021	1.55105	2.48691	1.38743	3.34424	2.51963	4.05105	1.94372	0.157068	2.10079	2.12696	2.82723	2.45419	3.10209	2.24476	3.93325	3.40969	2.89921	2.06806	2.07461	2.13351	0.935864	3.0301	3.49476	3.40969	3.32461	2.93194	2.7356	3.25262	3.72382	3.93325	3.97251	3.30497	2.76178	3.50131	3.72382
0.274869	2.42105	1.54656	1.12551		1.39271		1.35223	0.453441	1.36032		1.48178		1.02024	1.00405	1.18219	1.75709	1.30364	1.73279	1.53036	1.48178	2.40486	1.53036	0.736842	0.931174	1.32794	1.1498	1.10121	1.74899	1.75709	2.49393	0.825911	0.728745	0.995951	0.688259	1.36032	1.12551	1.20648	1.06073	1.24696	0.801619	0.761134	0.939271	0.817814	1.33603	2.2996	1.06073	1.08502	1.02834	1.1336
0.412304	2.38866	1.28067	1.64312	0.604089	1.7881	0.386617	1.49814	0.628253	1.42565	0.628253	2.24721	1.14777	0.749071	0.954461	1.54647	0.797398	1.25651	1.42565	1.80019	1.03903	2.44052	0.918216	0.797398	1.329	0.990706	1.20818	1.38941	1.73978	1.17193	2.81506	1.09944	1.28067	1.09944	1.67937	0.942379	2.11431	1.5223	2.38011	0.942379	1.09944	1.03903	1.329	1.81227	1.5948	2.53717	1.02695	1.31691	1.6552	1.96933
	2.04858	1.68194	2.72906	2.56545	2.06152	2.21859		2.70942	2.89921	2.5589	4.12958	2.34948
2.05668	1.60324	1.1417	1.7247	1.4251	1.51417	1.39271	1.54656	1.74899	0.566802	0.720648	1.45749	0.647773
	1.7004	1.30483	1.40149	2.54926	1.14777	2.11431	2.93587	2.9842	2.11431	1.1961	3.20167	1.57063
0.769231	1.95142	2.00262	2.37565	1.49869	2.59162	2.00916	2.08115	0.59555	0.739529	0.589005	1.4267	1.20419
0.761134	1.7004	0.874494	0.866397	1.02834	1.22267	1.04453	0.801619	0.979757	1.06883	1.08502	1.1498	0.8583
0.923077	2	1.18401	1.38941	1.12361	1.53439	1.20818	1.88476	1.13569	1.09944	0.785316	2.01766	1.31691
1.01215	3.15335	1.27618	1.86518	1.92408	2.16623	3.04319	3.32461	2.66361	3.04319	3.60602	2.57853	3.65183
0.963563	3.09294	0.631579	1.51417	1.61134	1.33603	1.12551	1.33603	1.58704	0.801619	1.02024	1.53846	0.769231
0.801619	2.52509	0.555762	2.46468	1.81227	1.64312	2.3197	1.6552	2.9842	1.90892	2.86338	2.30762	2.35595
0.663968	1.70353	2.65707	2.8534	3.14791	2.07461	1.09293	2.64398	0.804974	0.804974	0.680628	0.896597	0.490838
0.842105	2.73048	2.21053	0.672065	1.04453	1.88664	1.55466	0.801619	0.712551	0.663968	1.26316	1.19028	0.720648
1.02834	2.44052	1.12361	0.761152	1.02695	0.930297	1.30483	1.22026	0.628253	1.47398	1.09944	2.0539	1.03903
1.11741	1.61896
1.06073	1.76394
1.24442	1.96933
1.35316
1.17193
0.519517
1.11152
0.966543
1.40149
0.978625
1.09944
0.833643
0.797398
0.918216
0.604089
1.07299	3.39244	0.462606	0.841686	0.597533	1.16294	1.10511	0.873811	1.54202				2.45438	0.591108	0.693909	0.938062	0.713184	0.610383	0.738885				0.616808	0.78386	0.719609	0.918787	0.481881	0.610383				0.507582	1.04729	0.78386	0.886662	1.02801				0.963763	1.24004	0.726034	0.687484				0.751735	1.27859	1.34284
0.603958	3.70085	0.623233	0.558982	0.462606	1.17579	1.22077	1.18864	1.10511				0.674634	0.655359	0.469031	0.571832	0.584683	0.616808	0.578258				0.558982	0.488306	0.514007	0.526857	0.867386	0.603958				0.481881	0.78386	0.591108	1.16937	0.681059				0.469031	0.918787	0.79671	0.78386				0.436906	0.700334	1.09869
	3.30249												0.764585	0.623233	0.848111	0.905937	1.07299	0.79671				1.15009	0.73246	1.27217	1.36212	1.57415	1.50347				1.53559	1.20149	1.57415	1.6898	1.25932				1.41994	1.45849	1.68337	0.938062				1.24647	1.31714	1.50347
1.05371	3.44384												0.700334	0.616808	0.841686	1.39424	0.78386	1.48419				1.50989	0.449756	0.738885	0.873811	0.636083	0.963763				1.7926	0.828836	0.950912	0.681059	0.790285				0.642508	1.09226	0.777435	0.957337				1.58057	1.27217	1.21434
0.957337	3.49525
0.931637	2.88486
1.24004	4.11848
1.05371	4.72244
1.27217	3.16114
1.07941
0.944487
1.26574
1.23362
0.905937
0.713184
1.45849
1.15652
0.841686
0.74531
0.828836
0.40478
1.19507
1.16294
0.957337
1.04729
0.873811
[truncated: 18 more columns]

## Sheet: Tunicamycin
DMSO	POS	WAR	CPO	DHA	ART	ZPT	CAL	COR	57D	SUL	MIC	CLO	WAR+CPO	WAR+DHA	WAR+ART	WAR+ZPT	WAR+CAL	WAR+COR	WAR+57D	WAR+SUL	WAR+MIC	WAR+CLO	CPO+DHA	CPO+ART	COP+ZPT	CPO+CAL	COP+COR	CPO+57D	CPO+SUL	CPO+MIC	CPO+CLO	DAH+ART	DHA+ZPT	DHA+CAL	DHA+COR	DHA+57D	DAH+SUL	DAH+MIC	DHA+CLO	ART+ZPT	ART+CAL	ART+COR	ART+57D	ART+SUL	ART+MIC	ART+CLO	ZPT+CAL	ZPT+COR	ZPT+57D
1.0171		1.70686	1.61918	1.51104	1.52273	1.29184	1.87638	1.54904	1.65133	1.65425	1.04048	0.903118	2.17157	1.94068	2.21249	2.43462	2.88472	3.13899	2.36447	2.23003	2.15111	1.7887	1.44382	1.5695	1.85008	2.49015	2.3294	2.15696	1.52273	1.92022	2.1365	1.72732	1.96698	1.66302	1.91145	1.94945	1.99913	1.51689	1.43505		1.85008	2.08389	1.34737	1.69225	1.29184	1.68056	1.62795	1.88807	1.69225
1.22169		2.27971	1.87346	1.04633	1.20708	1.52565	1.35321	1.54611	1.24507	1.05802	1.25677	1.61041	2.3937	1.35614	1.12232	1.51104	2.01082	2.08682	1.29768	1.55196	2.55737	3.71184	1.35906	1.2743	1.66887	1.73317	1.54027	1.23631	1.92314	1.82962	3.27928	1.54611	1.45259	1.56073	1.49351	1.57242	1.64549	0.169517	2.86718	1.21292	1.35614	1.36198	1.35614	1.57826	1.63087	2.58368	1.21877	1.21585	1.51104
		3.10976	1.91438	1.7244	1.57534	1.6864	1.60457	1.69225	1.48181	1.49058	1.19831		1.31814	1.37367	0.941113	1.22169	1.47597	1.03464	1.1194	0.879736	0.900195		2.02544	1.73901	1.48181	1.19831	1.34152		1.1457	0.955726	1.27722		1.41459	1.23631	1.35321	1.23923	1.17201	1.17493	0.8622	1.64256	1.51981	1.43505		1.36783	1.3766	1.45551	1.54611	1.12524	1.39413
0.979108													2.11604	2.08682	1.93191	1.73024	1.87346	1.9173	1.52565	1.73609	1.61041	1.18662	1.77409	1.43505	1.70686	1.51396	1.61918	1.23338	1.51104	1.46428	1.35029	1.11355	0.949881	0.888504	1.18078	0.958649	1.28015	1.03172	1.05802	1.18954	1.03464	1.45551	1.09894	1.22754	0.885581	1.08433	1.02587	1.54319	0.812514
0.97034		0.923577	0.774518	1.14278	1.36783	1.0551	1.39121	1.28892	0.964494	1.15155	0.984953	1.32691
1.57534		1.10771	1.28599	0.824204	0.903118		0.932345	0.964494	1.11063	0.713141	1.24507
1.6864		0.961572	1.66887	0.982031	2.03713	0.879736	0.748214	1.96991	1.19831	1.28599	1.17201	0.783286
1.33276		1.28015	1.18078	0.961572	0.827127	1.09017	0.90604	1.0171	0.955726	1.06387	1.09894
1.94068
1.99329
1.4409
1.03172
0.987876
0.838818
1.34445
1.25384
1.37075
0.704373
0.789132
0.935267
1.02295
0.964494
1.36198
1.32983
1.14278
1.39998
1.35614
0.742368
0.835895
0.634228
0.926499
0.976185
0.83005
0.8622
0.739446
0.628383
0.888504
1.04925
1.06971
1.0551
1.42628
0.727755
0.961572
0.932345
1.07556
0.713141
0.470556
0.441329
0.531933
0.634228
0.745291
0.406257
0.546547
0.537779
0.619615
1.81244	3.05627	2.61204	1.27048	0.959526	1.67917	3.14511	1.74136	0.639684	1.61698	2.33662	1.01283	1.53702	1.24383	1.16387	1.94571	1.76802	2.0079	1.64363	2.14116	2.49654	2.89635	2.35439	0.621915	1.21718	1.10168	1.35933	1.4926	0.915104	1.71471	1.20829	1.2616		1.35044	1.01283	0.826259	0.995064	1.19941	1.46594	1.2616	1.29714	2.38993	1.87463	2.19447	3.51826	3.12734	1.69694	1.83021	2.0079	1.96347
0.0266535	4.19348	1.19941	1.42152	1.60809	1.6614		1.46594	0.879566	1.55479	1.08391	0.915104	1.23495	2.02567	2.66535	1.6614	2.11451	2.34551	1.40375	1.19052	2.32774	3.00296	1.55479	1.15499	2.01678	1.58144	1.32379	1.20829	1.70582	1.20829	1.80355	1.51037	1.48371	1.07502	1.19052	1.01283	0.817374	0.684107	0.568608		1.56367	1.91017	1.11945	1.08391	0.932873	1.92794	1.03949	1.6614	0.764067	2.07009
1.4926	4.1846	1.39487	1.65252	1.04837	1.98124	1.64363	1.35044	1.74136	1.53702	1.67917	2.15893	1.6614	1.57256		1.01283	1.43929	0.817374	1.46594	1.05726	0.923988	1.97236	1.55479	0.746298	1.58144	1.29714	1.52813	1.09279	1.28825	1.78578	1.55479	1.15499	1.44817	1.18164	0.737414	1.12833	1.11056	1.17275	0.870681	1.07502	1.62586	1.79467	1.99013	1.31491	3.40276	1.83909	1.50148	1.60809	1.58144	1.67917
1.24383	3.74926	2.23889	0.959526	1.08391	0.657453	0.781836	0.764067	1.34156	1.59921	0.701876	0.639684	1.43929	1.65252	0.870681	1.38598	1.05726	1.62586	1.22606	1.85686	2.01678	1.29714	1.39487	1.16387	1.82132	1.1461	1.36821	0.915104	1.51037	2.78973	1.69694	0.968411	1.52813	1.99013	0.817374	0.861797	0.657453	1.52813	1.06614	1.02172	1.59921	1.62586	1.12833	1.59921	1.40375	1.98124	1.44817	1.50148	1.45706	1.17275
0.719645	4.00691	1.3771	1.58144	1.28825	1.52813	1.57256	3.76703	2.78085	1.45706	1.64363	2.02567	1.47483
1.10168	3.50049	1.51037	1.48371	0.701876	1.84798	1.51037	2.07897	1.19052	1.16387	1.28825	1.11056	1.22606
	0.106614	1.50148	1.35044	0.941757	1.50148	3.59822	1.71471	1.06614	1.74136	1.67917	1.76802	1.69694
	2.84304	0.915104	1.07502	1.23495	1.0306	0.968411	1.46594		1.21718	1.02172	1.02172	1.1461
1.04837	3.12734
1.06614
0.488648
[truncated: 18 more columns]
