# Supplementary material for: Large-scale phenotypic drug screen identifies neuroprotectants in zebrafish and mouse models of retinitis pigmentosa
Source: eLife. 2021 Jun 29;10:e57245. doi: 10.7554/eLife.57245 (PMC8425951; doi:10.7554/eLife.57245)
Supplement: Figure 4—source data 1. [file elife-57245-fig4-data1.xlsx]

## Sheet: Thapsigargin
DMSO	WAR 30 µM	CLO 30 µM	CPO 0.04 µM	MIC 30 µM	ZPT 0.37 µM	DHA 0.37 µM	CHL 0.04 µM	CAL 0.04 µM	SUL 1.1 µM	ART 0.04 µM	COR 30 µM	POS
0.349166	0.792702		0.736081		1.96288	1.19849	1.32117	0.396351		1.10412	1.56653
0.396351	1.2268		1.28342		2.30261	2.20824	0.849324	0.481283		1.47216	1.65146
0.528468	1.46272		1.15131		1.34948	0.905945	1.71752	0.70777		1.50991	2.13275
0.773828	2.21768		1.95344		1.45329	2.22712	0.934256	0.6134		1.6609
	1.33061		0.688896		1.42498		1.46272	0.49072		1.15131	2.74615
0.519031			1.13243		1.88739	1.70808	1.13243	0.651148		1.49103	2.79333
0.934256
0.49072
0.868198
0.386914
0.660585
2.095
0.698333
1.26455
0.509594
1.05694
0.83045
0.95313
0.924819
0.905945
1.12299
1.13243
1.4061
1.4061
1.63259
1.13243
1.37779
1.46272
1.86851
1.12299
1.18905
1.0961		2.65129		2.29549					2.03725
1.29121		2.01429		2.79476					2.12907
1.19366		2.35862		1.58963					1.93395
0.998539				2.28402					1.53224
1.1707		2.3701		2.46192					2.17498
0.86081		1.97986		2.19793					2.3414
0.969846		2.22663		2.14055					3.16204
0.568134		1.48059		2.24958					1.65849
1.22235
0.746035
1.07888
0.579612
0.803422
0.424666
0.843593
1.88804
2.35288
1.41173
1.79622
1.45764
1.88804
1.13627
0.803422
1.3773
1.274
1.16496
0.809161
1.01576
0.67717
1.51503
1.20513
1.68719
1.21087
1.17644
1.04445
1.04445
0.384495
0.728819
0.487792
0.49927
0.384495
0.878026
1.04445
1.2453
1.20513
1.23957
1.05019
1.04445
0.332846
0.510747
0.533702
0.378756
0.447621
0.367279
0.45336
2.02225		1.62958		2.3233					2.42147			3.10209
0.798429		4.47644		5.38613								2.93194
2.68325		1.70157		2.28403								3.29188
0.831152		2.17814		1.49798					1.44939			2.63743
0.831152		2.02429		1.76518					1.4332			2.09424
1.12565		1.4332		1.10121					0.898785			2.59817
0.719895		1.6552		2.76673					2.56134			2.10733
		1.1961		4.24071					3.28625			2.39529
0.301047		1.82435		1.5948					2.17472
												2.08097
0.274869												2.42105
0.412304												2.38866
												2.04858
2.05668												1.60324
												1.7004
0.769231												1.95142
0.761134												1.7004
0.923077												2
1.01215												3.15335
0.963563												3.09294
0.801619												2.52509
0.663968												1.70353
0.842105												2.73048
1.02834												2.44052
1.11741												1.61896
1.06073												1.76394
1.24442												1.96933
1.35316
1.17193
0.519517
1.11152
0.966543
1.40149
0.978625
1.09944
0.833643
0.797398
0.918216
0.604089
		1.43279		2.0239								3.39244
1.07299		0.983038		1.82472								3.70085
0.603958		0.912362		1.75405								3.30249
1.05371		0.828836		2.98766								3.44384
0.957337		1.47134		2.1267								3.49525
0.931637		0.873811		1.43279								2.88486
1.24004												4.11848
1.05371												4.72244
1.27217												3.16114
1.07941
0.944487
1.26574
1.23362
0.905937
0.713184
1.45849
1.15652
0.841686
0.74531
0.828836
0.40478
1.19507
1.16294
0.957337
1.04729
0.873811
0.8908	0.551493		1.1374		1.92115	0.694863	1.5675	1.319		0.95006	1.40502	1.64397
1.08961	0.579211		1.34767		1.87336	0.723536	1.32855	1.30944		1.27121	1.54839	2.02628
0.965352	0.797133		1.2043		1.60573	0.965352	1.45281	1.04182		1.87336	1.57706	1.41458
1.24253	1.44325		1.34767		2.35125	1.48148	0.929988	1.07049		1.83513	1.37634	2.02628
0.933811	1.58662		1.73955		2.05496	1.62485	1.09916	1.12784		1.61529	1.26165	1.29988
1.04182	1.10872		1.37634		1.90203	1.43369	0.885066	0.932855		1.17563	0.944325	1.37634
1.01314												2.12186
0.822939												1.7491
												1.36679
												1.63441
												1.21386
												1.17563
												1.5006
												1.2043
												1.59618
												1.33811
