# Supplementary material for: Large-scale phenotypic drug screen identifies neuroprotectants in zebrafish and mouse models of retinitis pigmentosa
Source: eLife. 2021 Jun 29;10:e57245. doi: 10.7554/eLife.57245 (PMC8425951; doi:10.7554/eLife.57245)
Supplement: Figure 5—source data 1. [file elife-57245-fig5-data1.xlsx]

## Sheet: Sheet1
0.1% DMSO	2.30189
0.1% DMSO	1.86538
5µM Warfarin	1.7069
5µM Warfarin	1.84483
5µM XL-880	6.50794
5µM XL-880	6.53846							best doses (without proliferation)
1µM Warfarin	3.23913							treatment	rows	SEM
1µM Warfarin	2.43103							DMSO	2.043	0.046
1µM XL-880	4.5283							CIC	3.34608	0.457
1µM XL-880	4.4918							ART	3.159	0.34
200nM Warfarin	3.35185							DH-ART	5.968	0.488
200nM Warfarin	3.25							XL-880	6.48516	0.0390434
200nM XL-880	3.25926
200nM XL-880	2.7619
0.1% DMSO	2.43902
0.1% DMSO	1.94737
0.1% DMSO	1.86957
2µM Sunitinib	2.61364
2µM Sunitinib	2.25373
2µM Sunitinib	5.81579
2µM Sunitinib	5.67925
1.2µM SBJ-051	5.66667
1.2µM SBJ-051	1.66667
1.2µM SBJ-051	2.26531
1µM Sunitinib	2.01852
1µM Sunitinib	2.97826
1µM Sunitinib	2.73077
1µM Sunitinib	6.42
0.6µM SBJ-051	2.68293
0.6µM SBJ-051	3.42593
0.6µM SBJ-051	2.12903
0.6µM SBJ-051	1.32203
0.5µM Sunitinib	2.08197
0.5µM Sunitinib	2.61905
0.5µM Sunitinib	5.68421
0.5µM Sunitinib	2.81481
200nM SBJ-051	1.69767
200nM SBJ-051	2.86792
200nM SBJ-051	1.76087
200nM SBJ-051	2.61905
1µM PZ	1.6875
1µM PZ	2
1µM PZ	1.88235
1µM PZ	2.03509
0.2µM PZ	2.26
0.2µM PZ	2.37778
0.2µM PZ	4
0.2µM PZ	2.71429
0.04µM PZ	2.09091
0.04µM PZ	2.67241
0.04µM PZ	2.73846
0.04µM PZ	1.42105
0.1% DMSO	2.30612
0.1% DMSO	1.625
0.1% DMSO	1.97959
0.1% DMSO	2
25µM ART	3.4902
25µM ART	3.90566
25µM ART	3.26
25µM ART	3.04839
5µM ART	2.6
5µM ART	3.73016
5µM ART	2.54
5µM ART	3.76471
1µM ART	3.475
1µM ART	3.38776
1µM ART	2.32075
0.1% DMSO	1.92453
0.1% DMSO	1.93333
0.1% DMSO	2.3617
0.1% DMSO	2
15µM CO	8.66667
15µM CO	6.375
15µM CO	6.47458
15µM CO	7.09524
3µM CO	5.03636
3µM CO	3.71875
3µM CO	2.78571
0.6µM CO	2.89062
0.6µM CO	2.72973
0.6µM CO	2.98148
0.6µM CO	3.65789
0.6µM CO	2.78431
0.1% DMSO	2
0.1% DMSO	2.3617
0.1% DMSO	2
0.1% DMSO	2
25µM Cx	2.67857
25µM Cx	2.8
25µM Cx	2.26415
25µM Cx	2.35211
5µM Cx	2.35417
5µM Cx	1.82
5µM Cx	2.44444
5µM Cx	2.29545
1µMCx	1.98387
1µMCx	1.5493
1µMCx	1.70492
1µMCx	1.95556
0.1% DMSO	2.2449
0.1% DMSO	1.84211
0.1% DMSO	2.54167
0.1% DMSO	1.74468
0.8µM DHA	2.80851
0.8µM DHA	2.22222
0.8µM DHA	4.41667
0.8µM DHA	3.54545
0.8µM DHA	2.95122
3µM CO	2.03333
3µM CO	3.15152
3µM CO	5.44681
3µM CO	2.25
3µM CO	2.34615
Combo	1.64286
Combo	1.59524
Combo	6.21622
Combo	2.2
Combo	2.07143
Combo	2.22857
0.1% DMSO	1.91589
0.1% DMSO	2.04878
0.1% DMSO	1.83871
0.1% DMSO	1.97826
4µM DHA	4.83333
4µM DHA	5.95714
4µM DHA	7.21538
4µM DHA	5.86538
0.8µM DHA	3.325
0.8µM DHA	5.33962
0.8µM DHA	5.62745
0.8µM DHA	3.40541
0.16µM DHA	3.34921
0.16µM DHA	3.07547
0.16µM DHA	2.7234
0.16µM DHA	3.02778
0.1%DMSO	2.90476
0.1%DMSO	2.67241
0.1%DMSO	2.80952
0.1%DMSO	1.9
0.1% DMSO	2.30189
0.1% DMSO	1.86538
5µM XL-880	6.50794		6.48516	0.0390434
5µM XL-880	6.53846
5µM XL-880	6.40909
0.1% DMSO	2.43902
0.1% DMSO	1.94737
0.1% DMSO	1.86957
0.1% DMSO	2.30612
0.1% DMSO	1.625
0.1% DMSO	1.97959
0.1% DMSO	2
25µM ART	3.4902
25µM ART	3.90566
25µM ART	3.26
25µM ART	3.04839
0.1% DMSO	1.92453
0.1% DMSO	1.93333
0.1% DMSO	2.3617
0.1% DMSO	2
3µM CO	5.03636
3µM CO	3.71875
3µM CO	2.78571
0.1% DMSO	2
0.1% DMSO	2.3617
0.1% DMSO	2
0.1% DMSO	2
0.1% DMSO	2.2449
0.1% DMSO	1.84211
0.1% DMSO	2.54167
0.1% DMSO	1.74468
3µM CO	2.03333
3µM CO	3.15152
3µM CO	5.44681
3µM CO	2.25
3µM CO	2.34615
0.1% DMSO	1.91589
0.1% DMSO	2.04878
0.1% DMSO	1.83871
0.1% DMSO	1.97826
4µM DHA	4.83333
4µM DHA	5.95714
4µM DHA	7.21538
4µM DHA	5.86538
0.1% DMSO	2.90476
0.1% DMSO	2.67241
0.1% DMSO	2.80952
0.1% DMSO	1.9
				treatment	rows	SEM
				DMSO	2.043	0.046
				CIC	3.34608	0.457
				ART	3.159	0.34
				DH-ART	5.968	0.488
				XL-880	4.51	0.018
