# Supplementary material for: Large-scale phenotypic drug screen identifies neuroprotectants in zebrafish and mouse models of retinitis pigmentosa
Source: eLife. 2021 Jun 29;10:e57245. doi: 10.7554/eLife.57245 (PMC8425951; doi:10.7554/eLife.57245)
Supplement: Figure 7—figure supplement 1—source data 1. [file elife-57245-fig7-figsupp1-data1.xlsx]

## Sheet: SourceData
+MTZ	BMN0.5µM	BMN0.25µM	BMN0.125µM	Nec64µM	Nec32µM	Nec16µM	BMN0.2µM+Nec64µM	BMN0.5µM+Nec32µM	BMN0.5µM+Nec16µM	BMN0.25µM+Nec64µM	BMN0.25µM+Nec32µM	BMN0.25µM+Nec16µM	BMN0.125µM+Nec64µM	BMN0.125µM+Nec32µM	BMN0.125µM+Nec16µM	-MTZ
-0.00274596	0.198332	-0.11811	0.0538578			0.260866			0.460327			0.396715			0.736338	0.508305
0.230677	0.0306772	0.146041	0.178386			-0.0949292			0.527173			0.426904			-0.101398	0.722861
-0.0550371	0.0177392	0.208036	0.0694912			0.160596			0.40534			0.0856637			0.18216	2.60911
-0.0749832	0.425286	0.0840465	0.930408			0.29968			0.0172001			-0.111641			-0.0695923	1.27812
-0.143447	-0.173096	0.0085748	0.0295991			-0.115954			-0.00436321			-0.0668969			0.444693	0.724478
0.0818902	0.574073	0.267874	0.0312163			0.0468497			-0.134821			0.0630222			0.608575	-0.129431
0.0694912	-0.0604279	-0.0965465	0.179464			-0.0372473			0.0279818			0.0193565			-0.131587	1.35035
-0.170401	0.234451	0.144424	0.139033			0.289976			0.759518			0.0322945			0.224208	0.427443
0.0414589	0.0667958	0.238224	-0.000589623			-0.0318565			0.40534			0.702375			2.55628	1.48351
-0.116493	0.162214	-0.0668969	-0.0954683			0.0490061			0.343346			0.0139656			-0.0938511	0.96437
-0.142908	-0.0690532	0.35844	2.20426			0.022591			0.153588			0.0899764			0.138494	0.764909
-0.0237702	0.325017	0.326634	0.0463106			0.0754212			0.111001			0.215583			-0.110563	0.314235
0.0409198	0.172456	0.0948282	0.221513			-0.177409			-0.0210748			0.216122			0.0322945	0.779464
0.0279818	0.161675	-0.00166779	-0.0615061			0.184855			-0.110563			-0.136978			0.0134265	0.926095
0.0500842	0.38809	0.0926718	0.0301381			0.0371462			0.35251			-0.0140667			0.0333726	0.964909
0.103454	0.061405	0.414505	0.512618			-0.192503			-0.067436			0.087281			-0.0873821	0.503454
-0.0636624	0.21127	0.209653	0.105071			0.0285209			0.862483			0.274882			0.0953673	1.07326
-0.0620451	-0.0728268	-0.00759771	0.230138			-0.0760613			0.204262			0.316931			0.586472	1.84038
-0.139673	0.0188174	-0.0625842	0.672187			0.291594			0.204801			0.371378			-0.0685142	2.05979
0.177847	0.316931	0.206958	0.473265			-0.0210748			0.346041			-0.00166779			0.167604	2.52879
-0.132665	0.328251	-0.086843	0.0252864			0.0948282			0.372456			-0.104094			0.136338	0.820435
0.0716476	0.00695755	0.146041	0.245772			0.294289			0.0759602			0.384855			0.631755	0.216661
-0.0102931	-0.0857648	0.170839	0.0317554			0.0694912			0.237685			-0.0129885			-0.116493	0.987551
-0.0900775	0.427443	0.374613	0.104532			0.122861			-0.1359			-0.00651954			0.465179	2.71747
-0.0717487	0.445232	0.143885	0.0452325			0.0473888			0.471648			0.426365			0.0781166	0.719087
0.170839	-0.0474899	-0.0561152	-0.122423			0.600489			0.118548			0.0414589			-0.0749832	1.04469
-0.0798349	-0.000589623	-0.0264656	0.0490061			-0.0615061			0.25871			0.0721867			0.21127	1.60965
-0.0108322	0.509923	0.113696	-0.00382412			-0.0167621			0.417739			0.0382244			0.245232	0.527173
-0.0372473	0.104532	0.0500842	-0.10032			0.0700303			0.309383			0.419356			-0.0140667	0.441998
-0.0119104	0.0597877	0.11154	0.127712			-0.10625			-0.0658187			0.251162			-0.0302392	0.544424
0.487281	-0.0485681	-0.0771395	0.334181			-0.132126			0.0247473			-0.127274			0.104532	0.575691
-0.113797	-0.0329346	-0.0243093	-0.109485			-0.100859			0.035529			0.268952			0.0980627	0.100758
0.0659212	-0.0505974	-0.0102641	-0.036655	0.234226	0.00118864	0.248168	-0.0311777	0.345765	-0.00130108	0.111234	0.0355467	-0.00976611	0.189909	0.858646	0.519049	1.02745
-0.0311777	-0.0212188	0.000192752	0.0579541	0.033057	-0.0167373	0.00865778	0.203851	0.239703	0.21879	0.311905	0.137127	0.0923122	0.0116454	0.0455056	0.181444	2.07313
0.0275796	0.161526	-0.0744987	-0.0341653	0.144098	0.0699048	0.0335549	0.296469	0.258625	0.0141352	0.294477	0.21381	0.384605	0.28402	0.121193	-0.00976611	0.697811
0.0539706	0.158041	0.0410241	0.13165	0.015131	0.678889	0.111234	0.0738883	0.355724	0.218292	0.16551	0.455811	0.21381	0.385103	0.0579541	0.505107	1.36256
-0.0784822	0.539465	0.093806	0.318876	-0.00926816	0.436391	-0.00229696	0.505605	0.27207	0.30095	-0.0242065	0.254144	0.0758801	0.132148	-0.0331694	0.571333	0.363193
0.0171228	0.0465014	0.372156	0.153559	-0.00877022	-0.0466139	-0.0560748	0.183934	0.340786	-0.00976611	0.0455056	0.0320611	0.299456	0.1436	-0.00179902	0.0788677	2.24094
0.106753	-0.0510954	0.168497	0.226757	0.100279	0.110736	0.0738883	0.275555	-0.0122558	0.169991	-0.0331694	0.304934	0.183436	0.188415	0.0226002	-0.0451201	2.16774
-0.0207209	0.0713986		-0.0386468	0.0878307	0.313897	0.0300693	0.0629336	-0.0600583	0.076876	0.266094	0.187917	-0.0296838	0.125674	0.239703	0.0186166	0.266592
0.231238	0.17995	0.185428	0.17746	0.144596	0.0718965	0.0534727	0.176963	0.183436	0.157045	0.179452	0.122189	0.133144	0.231238	0.14858	0.116711	1.34812
0.121193	0.137625	0.0484932	-0.0436262		0.00218452	0.194888	0.127666	0.528012	0.149078	0.19937		0.278543	0.188913	0.0823533	0.0111475	0.557889
0.076876	0.167004	0.132148	0.140613	0.251654	0.813832	0.337798	0.499132	0.416473	0.332819	0.305432	0.170987	-0.0117579	0.199868	0.168	0.217296	0.67391
0.00268247	-0.00279491	0.291987	0.00915573	-0.0580666	0.197378	-0.0491036	0.239703	0.181942	0.174473	0.0778719	0.176465	0.975165	0.0748842	0.205843	0.392572	0.800387
-0.0222147	-0.0560748	0.0206084	0.094304	0.134637	0.0455056	0.00517218	0.274559	0.241197	0.157045	0.684366	0.275555	0.180448	0.114222	0.0933081	0.235222	0.661461
-0.0899349	0.0161269	0.460292	0.10725	0.00616807	0.150572	0.206341	0.173975	0.247172	0.0952999	0.118703	0.196382	0.0270817	0.109242	0.0131393	0.0957978	0.99807
-0.0595604	0.0798636	0.0101516	0.024592	0.050485	-0.00528462	-0.0142476	0.0967937	0.0131393	0.076876	0.138123	0.138621	0.0300693	0.0858389	0.197876	0.0295714	0.563366
-0.0286879	0.264103	0.0778719	-0.0705152	0.369666	0.106255	0.076378	0.162024	0.108246	0.314893	0.239703	0.33979	0.0748842	0.274559	-0.0386468		0.703786
	0.123683	0.153061	0.076876	0.423444	0.44386	0.188913	0.41249	-0.0391447	0.0514809	0.00865778	0.117209	0.228251	0.107748	0.0126413	0.0773739	1.05185
-0.0286879	0.0216043	0.0285755	0.184432	0.0967937	0.0186166	-0.00329285	0.033057	0.162024	0.103267	0.108744	0.220781	0.115218	0.164016	0.076876	0.0948019	1.69519
-0.0411365	0.142604	0.214308	-0.0904329	-0.0112599	0.11223	0.0310652	0.194391	0.105259	0.0838472	0.0848431	0.51656	-0.00628051	0.111732	0.611169	0.0280776	0.399543
-0.0585645	0.182938	0.442366	0.539963	0.0654233	-0.0157414	0.0923122	0.0748842	-0.0232106	0.501123	1.17932	-0.00877022	0.420955	0.0300693	0.203851	0.2646	1.23758
-0.0550789	0.156049	-0.0426303	0.212316	-0.0112599	0.240201	0.0479953	0.301448	0.270576	0.0977896	0.278045	0.624613	0.180448	0.268584	-0.00727639	0.032559	0.678391
0.032559	0.0360446	-0.0207209	0.309415	0.187917	0.319374	0.0903204	-0.00827228	0.136629		0.304934	0.215802	0.140115	0.185428	0.227753	-0.037153	0.230242
-0.0481077	0.14609	-0.019725	0.241695	0.444856	0.093806	-0.0486057	0.307424	0.767523	0.166008	0.0230981	0.0201105	0.151567	0.313399	0.00268247	-0.0162394	0.659469
-0.0112599	-0.0296838	-0.0759925	-0.0276921	0.00318041	-0.0381489	0.00616807	0.420457	0.254642	0.328337	0.25016	0.0181187	0.0186166	0.0529747	0.148082	0.174473	1.15094
-0.0386468	0.0574562	-0.0232106	0.397551	0.144596	0.190407	0.0410241	0.140115	0.165012	0.00865778	0.300452	-0.0152435	0.266592	0.32535	0.0604439	0.0235961	0.711753
-0.0187291	0.119201	0.13165	0.236218	-0.00578256	0.103267	0.219786	0.0793657		0.0758801	0.0539706	0.240699	-0.0157414	0.560877	0.0519788	-0.00428873	1.16687
-0.0147455	0.0230981	-0.0520913	-0.0152435	0.0380364	0.0111475	0.0136372	0.380123	0.10974	0.190905	0.166506	0.117707	-0.0441242	0.0893245	0.546934	0.000192752	0.675403
-0.0934205	0.141609	-0.00379079	-0.071511	0.218292	0.0101516	-0.00329285	0.0619377	0.348255	0.256633	0.211819	0.115716	0.00716395	0.191403	0.093806	0.2163	1.16886
0.0524768		-0.0396427	0.265098	0.00815984	0.387094	-0.0486057	0.132148	0.164016	0.113226	0.0933081	0.0987855	0.0265837	0.101275	0.203353	0.197378	1.379
-0.0555769	0.0221022	0.139119	0.0146331	0.137127	0.140613	0.04202	0.158041	0.233728	0.0728924	0.149078	-0.036655	0.0634315	0.0116454	0.0913163	0.0584521	1.20024
0.0265837	0.0206084	-0.0356591	0.0619377	0.0126413	0.0694068	0.0654233	-0.0152435	0.318876	-0.0481077	0.505107	0.0216043	-0.0351612	0.541457	0.135135	0.256135	1.27443
-0.0202229	-0.0754946	-0.0605563	-0.0306797	-0.0580666	0.56984	0.0982875	-0.019725	0.459296	0.134139	-0.0376509	0.206839	0.0305673	0.131152	-0.0157414	0.0928101	0.813832
-0.0324898	0.0099101	0.0260291	0.00570515	0.118888	0.263258	0.00535474	0.716341	0.12905	0.453882	0.470001	0.174954	0.332289	0.215953	0.305308	0.00640597	0.40938
-0.0121659	0.158835	-0.0622748	0.0382935	-0.00585846	0.0621215	0.0312852	0.228567	0.0253282	0.0600191	0.106273	0.119589	0.24749	0.210346	0.262207	0.0442505	0.73211
-0.0654285	0.0596686	-0.0587707	0.00885886	0.0277811	0.0719331	-0.027584	0.000448966	0.0312852	0.29865	0.265361	0.246088	0.170749	0.752083	0.0614207	0.0319861	0.926589
0.123794	0.436362	0.148673	0.173903	0.149024	-0.00690969	0.00465391	0.0509083	0.331939	0.276223	0.354716	0.080343	-0.00305516	0.410431	0.149374	-0.00410639	0.970741
-0.0868037	0.301804	0.234875	-0.0517625	0.0712322	0.0190208	0.600355	0.0905049	0.0845479	0.269916	0.127298	0.5965	-0.0373956	0.195979	0.176006	0.158835	0.951117
-0.0219774	-0.0528137	-0.0640269	-0.0072601	0.00290185	0.0221745	-0.0713856	0.0368918	-0.0380964	0.342802	0.294094	0.228567	0.0375927	0.331939	-0.0272336	0.269916	0.278676
-0.0366947	-0.0889062	0.191424	-0.0170716	-0.0153196	0.257301	0.0610703	0.0530108	0.27342	0.0827959	0.260805	0.151126	0.0978636	0.158835	0.148323	-0.0668302	0.800791
-0.0790946	0.0120126	0.094009	-0.0265328	-0.0458055	0.185817	-0.043703	0.0617711	0.0474042	0.131153	0.24784	0.0565149	0.31547	0.14622	0.15393	0.0957611	0.841789
0.14622	0.275873	0.0015002	0.13711	0.0158671	0.0484554	0.0214737	0.935699	-0.0226782	0.192825	0.498385	0.0561645	0.0624719	0.124845	0.191073	0.161989	1.74866
-0.0118155	0.0841975	-0.0251311	-0.00971299	0.0340885	0.190723	0.0221745	0.0579166	-0.0230287	0.121692	0.192124	0.257652	0.0537116	0.165143	0.0235762		0.558656
-0.0671806	0.0565149	0.110128	0.106273	0.0368918	-0.0013031	-0.0671806	0.272719	0.0417976	0.00535474	0.168296	0.372587	0.100316	0.1287	0.0144655	0.10347	1.84502
-0.0640269	-0.0633261	0.156382	-0.0181229	0.0502075	0.0519596	-0.0419509	0.0989148	-0.0535145	0.0740355	0.218756	0.358921	0.132204	0.577928	0.211748	0.0333877	0.485069
-0.0840004	-0.0759409	0.00885886	-0.00585846	0.132905	0.0102605	0.124495	0.431806	0.0551133	0.183014	0.174954	0.388005	0.250293	0.074386	0.0249778	0.20544	1.04923
-0.0587707	-0.0419509	0.0572158	0.0263795	0.360673	0.0467034	0.0467034	0.0193712	0.102769	0.124845	0.344203	-0.0289857	0.345255	0.208944	-0.0345923	0.147973	0.533776
-0.0818979	-0.0818979	-0.0444038	-0.0114651	0.253447	-0.0013031	0.359972	0.328084	0.337896	0.357169	0.058267	-0.0300369	-0.0282848	0.064224	0.0071068	0.024277	0.899256
-0.0903078	0.181963	0.101017	0.00325226	0.206141	0.326683	0.338947	0.462643	0.235926	-0.0139179	0.49453	0.0652752	0.20544	0.337896	-0.00901217	-0.0804963	1.21918
0.224012	-0.0927607	0.0589678	0.0736851	0.0316357	0.0775397	0.00850845	0.0866504	0.420944	0.247139	0.23908	0.0845479	0.0162175	0.513102	0.104872	0.115384	1.46973
-0.0426517	0.0901545	-0.000602271	-0.0622748	-0.0219774	0.123093	0.0985644	0.0831463	0.15428	-0.00200392	0.0533612	0.00290185	0.183364	0.275172	-0.0209262	0.0715827	0.513102
-0.0559674	-0.0699839	0.0985644	-0.00761052	0.0544125	0.130802	0.0747364	0.118538	0.250643	0.237328	0.0596686	0.00675639	0.32458	0.178809	0.164092	0.0155167	1.89232
-0.0773426	0.353314	0.0235762	-0.0535145	0.36698	0.0200721	0.0365414	0.202286	0.20509	0.219106	0.125196	0.217705	0.462993	0.0148159	0.308461	-0.0608732	1.21673
0.149725	-0.0797954	0.177758	0.152878	-0.0419509	0.0859496	0.0884024	0.177407	0.406927	0.227166	0.603859	0.24749	0.38345	0.277975	0.126597	0.369433	0.953921
0.109427	-0.0282848	0.136759	0.0186704	0.0323365	-0.0282848	0.133606	0.316521	-0.0710351	0.136059	0.198081	0.164092	0.0799926	0.0968123	0.248541	-0.0391476	0.45178
0.0382935	-0.0465063	0.113983	0.0365414	0.0659761	0.0109613	0.0120126	0.215602	0.471753	0.212799	0.411833	0.156382	0.0915562	0.210696	0.11188	0.127298	0.564963
-0.0244303	-0.0174221	0.0572158	-0.00550804	0.0859496	0.064224	-0.000952683	0.0887529	0.408329	0.048105	0.420243		0.0144655	0.223662	0.151126	0.397466	1.58922
0.139563	0.0379431	-0.0493096	-0.0167212	0.221559	0.0554637	0.0179696	0.270266	0.0516092	0.224362	0.0568653	0.0102605	-0.0282848	0.0624719	0.0347894	0.115735	1.03136
0.0936586	-0.0587707	-0.0440534	-0.0279344	0.0211233	0.0610703	0.0740355	0.0330373	0.0912057	0.424448	0.161288	0.119239	0.0898041	0.160587	0.151477	-0.0444038	1.02926
0.117136	0.0109613	-0.0419509	-0.0408997	0.0863	0.0316357	-0.025832	0.131503	0.200534	0.301103	0.300402	0.428302	0.174954	0.328435	0.0565149	0.0719331	1.45361
-0.0752401	-0.0265328	-0.0359939	-0.0619244	0.255199	-0.00200392	0.0197216	0.0915562	0.138511	-0.0601724	0.0484554	0.449678	0.0996156	0.324931	-0.01567	0.10312	0.734913
-0.0468567	-0.0153196	-0.0293361	0.0673777	0.217354	0.0736851	0.215252	0.185116	0.140614	0.847045	0.185817	0.288488	0.0999661	0.218055	0.248541	0.058267	1.85028
-0.0608732	-0.0587707	0.0316357	0.117487	-0.0121659	0.116786	0.0943595	0.058267	0.152528	0.281129	0.0547629	0.427251	-0.00796093	0.113282	0.202286	0.328084	0.641703
0.0270803	-0.0938119	-0.0366947	0.0813942	0.150075	-0.0538649	-0.0444038	0.124845	0.190022	0.105573	0.159887	0.227166	0.548143	0.131854	0.25625	0.0558141	1.50757
0.0071068	0.225063	-0.0619244	-0.043703	0.0431993	-0.00831134	-0.0451046	0.202637	0.429704	0.28218	0.153579	0.348759	0.0547629	0.10347	0.283933	-0.0202254	0.849498
