# Supplementary material for: Large-scale phenotypic drug screen identifies neuroprotectants in zebrafish and mouse models of retinitis pigmentosa
Source: eLife. 2021 Jun 29;10:e57245. doi: 10.7554/eLife.57245 (PMC8425951; doi:10.7554/eLife.57245)
Supplement: Figure 7—source data 1. [file elife-57245-fig7-data1.xlsx]

## Sheet: Combined
+Mtz	AG_64µM	NMS_8µM	BMN_0.5µM	ABT_64µM	OLA_32µM	E7449_1µM	MK_32µM	RUC_32µM	NEC_64µM	Ac_0.5µM	InhI_0.5µM	InhVII_1µM	PAR_20µM	THI_100µM	MET_0.16µM	-Mtz
-0.0186928				0.135003												1.76345
-0.103677				-0.0588345												0.442393
0.110773				0.0283199												0.557032
-0.150328				0.354154												1.28826
				0.363918												1.41447
-0.032435				0.0185557												1.65604
-0.0888503				0.160317												0.475664
0.0333828				0.0478482												1.18447
-0.0139916				0.109688												1.29188
-0.0280954				0.0373608												0.777992
0.0756942				-0.0544948												0.716152
0.0116846				0.404783												0.415632
0.0167475				0.0203639												0.912882
0.0724395				-0.0114601												0.425396
-0.0541332				-0.0110985												2.53229
0.0294048				-0.0519634												1.34865
-0.0429225				0.243855												0.57439
-0.0317117				0.226858												0.668416
0.0286815				-0.0302652												0.779076
-0.080171				0.172974												1.08611
0.0847351																1.74103
0.0308513				-0.0132683												1.76707
0.0742476				-0.0450923												1.09768
0.164657				-0.0103752												0.200097
0.0149393				0.153446												0.30027
0.0742476				0.093776												0.881058
-0.00603558				0.00589841												0.137172
-0.052325				-0.0342432												1.40037
-0.0313501				0.159594												0.014216
-0.0877654				0.11005												2.1504
0.0102715	0.148293															0.791787
-0.0508695
0.00270458	0.0302483															1.36173
-0.0233258	0.0792822															1.72373
0.00936351	-0.0339195															2.61512
0.321728	-0.0124293															0.674348
-0.0169695																0.341402
-0.0478427	0.183706															0.980962
-0.0451186	-0.0348276															1.2343
-0.0593445	0.0553706															0.772113
0.0108769																0.966736
0.0768608	-0.0154561															1.41379
	0.154044															0.746991
0.0226814	0.0702019															0.72429
-0.0281686	0.218514															1.17679
-0.0523829	-0.0305901															0.594744
-0.0166668	0.0378153															0.533603
0.149806																0.456722
0.0614242	0.0880599															2.13961
-0.038157	-0.00637578															1.21433
-0.0620686	0.112274
-0.0566204	0.0659644															2.68686
-0.0508695	0.0626349															1.0642
-0.0417892	0.385896															0.843243
-0.045724	0.124381															0.669505
-0.0284713	0.411623															0.754255
-0.0366436	0.101378															1.24974
0.048409	0.0614242															0.222146
0.127408	0.0226814															0.473975
-0.0387624	0.0826117															0.312042
-0.0369463	0.073834															0.771508
-0.0647927	-0.000322206															0.489412
0.12594										0.371814						0.63764
-0.0127657										-0.0623265						1.00034
-0.0784177										0.190627						0.510841
-0.0459135										0.200925						0.570701
-0.0925779										0.0178076						-0.00311096
-0.057821										0.0702648						0.785035
0.124653										0.0654375						2.79708
-0.0127657										-0.023064						1.16318
-0.0735903										0.0738049						0.518887
-0.0980489										0.174536						0.853905
-0.0681193										-0.0822796						0.530795
0.0123366										0.0287496						0.631203
-0.0591083										0.126906						1.12263
-0.137633										0.0161985						1.04056
0.0538518										-0.0433389						0.926959
-0.0658666										-0.112209						2.90167
0.103091										-0.0105129						0.658237
0.281059										0.529185						0.352182
-0.00407643										-0.0555682						1.81455
0.0512772										-0.0832451						0.823332
0.00300369										0.0667248						0.433282
0.110815										-0.0694066						0.781495
-0.0655448										0.185478						1.30188
0.00622192										0.0738049						1.84673
-0.0417585										0.163017						1.10545
0.0556209										0.0500376						1.00757
0.0554567										-0.00595963						0.64975
0.00865549										-0.00218269						1.77002
-0.0332193										0.0848512						1.51303
-0.029935										-0.0516114						1.89926
-0.0167978										0.0285255						0.605576
-0.0200821										-0.0294424						0.539234
0.162853										-0.0686897						1.80927
0.0043859										0.163839						1.07671
0.0106261										-0.0603147						0.131981
0.00569962										-0.0731235						0.396531
-0.0805132										0.0896134						1.33338
-0.00185426										0.0488881						0.940246
-0.00940814										0.0700718						1.89056
-0.00415327										-0.00825864						1.17507
0.0150599										0.0257338						1.53553
0.000608963										0.0076702						0.512795
-0.0654054										-0.0402805						1.26391
0.0827164										0.0406774						0.362703
-0.0594937										-0.0486555						0.549743
0.0428122										0.0303319						0.31623
-0.0632706										0.0355867						0.772911
-0.0186042										0.0510229						0.842538
-0.186105										0.000845619						0.121907
0.11635										-0.032099						0.574002
0.0663379										0.00679946						0.558522
-0.0340836										-0.0416251						1.64252
-0.135696										-0.164274						0.346566
0.0385533										0.0306148						0.173507
										0.029821						1.22654
-0.115056										0.0643533						-0.00868053
0.0845964										0.310049						0.903845
-0.0332898										0.263609						2.22322
0.108809										-0.001139						0.93163
-0.0479759										0.00124254						0.439446
0.0714979										-0.0598836						3.04405
0.108015										-0.0253513						-0.0174128
0.101267										0.201689						0.620839
-0.042419										-0.143237						0.445399
-0.103942										-0.0209851						2.25338
0.127067										0.0286302						0.371969
-0.0412282										-0.0793328						1.67943
-0.0233667										-0.113865						1.13803
-0.0261451										0.0583995						3.29689
-0.0344805										-0.133314						0.812553
-0.106721										-0.0571051						0.263212
0.108015										-0.0404344						0.958621
0.079732											-0.0356891					2.42245
-0.0836577											-0.0506152					0.860903
-0.024523											0.602944					2.39681
0.314904											0.0944302					0.626529
-0.0312454											0.0992157					0.548025
-0.03398											-0.0591607					0.79573
-0.0951656											-0.117156					0.302029
-0.104623											-0.0971026					0.660825
											-0.0931147					0.808605
-0.0436648											-0.0575655					1.55047
0.197774											-0.0311315					1.01085
-0.047197											-0.0568819					0.82524
0.0685659											-0.0633764					1.44473
											0.119953					0.99125
0.00293654											-0.00458349					0.506095
-0.0558564											0.000999563					-0.0500455
-0.0302199											-0.0397909					0.237653
-0.0343218											0.410499					2.35374
0.0314215											-0.0888989					1.03648
-0.0524382											-0.0861644					0.949776
-0.0121035											-0.0432091					1.06622
0.00373412											-0.108269					0.844154
-0.0124453											-0.0482224					1.6415
-0.037626											-0.106901					0.169972
0.235222											0.115789					0.472174
-0.10012											-0.0834482					1.91876
0.107043											-0.0673234					0.436919
-0.0525651											-0.0990264					1.40769
-0.032614											0.074247					0.283323
0.0501964											-0.0481922					1.23578
0.0501964											0.141753					0.341809
-0.0410864											0.131094					0.85835
-0.041633											0.016307					0.729078
-0.128816											-0.0632238					0.580402
-0.087821											0.205705					3.36261
-0.0681433											-0.0924671					1.91521
0.0767067											0.0332517					0.473541
-0.0632238											0.0900985					1.34592
-0.0984798											0.0920116					0.978603
-0.105586											-0.00965666					1.09503
0.361761											0.0655013					0.347822
-0.0454592											-0.0602175					0.30792
-0.0394466											0.0532028					1.09284
-0.0550248											-0.0632238					1.14122
0.137106											-0.115698					0.604453
-0.00911006											-0.118977					1.05349
0.0430906											0.0463702					0.838672
-0.0921938											0.0105677					1.17839
0.00886717											0.103599					1.08769
-0.0316557											-0.0641277					1.49667
-0.0890854											-0.0179692					0.909226
0.0147712											0.0665653					2.45929
0.0518053											0.0354351					0.138487
-0.0837182											0.107088					1.13224
-0.0775458											0.00591517					0.879975
0.0748845											-0.0960629					0.297089
0.00108464											0.0598562					2.00066
0.0477799											0.0402657					0.952969
-0.0415851											0.0136977					1.62334
0.125874											-0.139001					0.82335
0.0169181											0.0815936					0.702318
0.024969											-0.0394382					0.170959
-0.0974047											-0.0115284					0.574577
0.0735427											-0.0839865					0.037582
0.00188973											0.0590511					2.2701
-0.133365											-0.0638593					0.501851
0.0896445											0.0110141					1.47279
0.00215809											-0.113238					2.40106
0.0950118											0.0931333					0.402556
0.0110141											0.222753					0.473136
0.00913553											0.168007					0.847503
-0.0949894											0.043486					0.34459
0.0803751												-0.00544023				0.530861
0.0784446												-0.040363				1.35462
-0.0308865												-0.030711				0.176193
0.0154432												0.0321149				0.417143
-0.0340453																0.893602
0.00982752												-0.0263237				0.690559
0.0221119												0.0233404				1.07295
-0.0021059												-0.0421179				0.824283
-0.0656338												0.0524719				0.509276
0.0487866												-0.0312375				1.72894
0.0493131												-0.00315884				0.330977
-0.0561572												-0.0308865				0.422057
0												0.00596671				1.18316
-0.0594916												-0.041065				1.86582
-0.00157942												-0.0677397				0.832882
0.00386081												-0.00456278				1.01381
0.0198305												-0.0245688				0.523666
0.106699												-0.0551043				1.31215
-0.0896761												-0.00333434				3.4549
-0.0852888												0.0284296				1.37304
-0.00982752												0.226384				0.489094
0.0664316												-0.0870017				0.791109
0.164561												0.179736				0.342611
-0.071827												0.00606989				0.879122
-0.0168608												-0.0246168				0.551011
0.355763												0.0391171				0.00876762
-0.0387798												0.0826179				0.387461
-0.0954321												0.0617105				0.38038
0.0121398												0.0236051				1.1816
0.206039												-0.029675				2.07792
-0.0131514												0.017198				0.708828
-0.14298												-0.0819435				0.119037
												0.565848				0.444451
-0.0158492												0.0873389				0.685223
-0.0155119												0.285622				0.0404659
-0.154445												-0.0829551				0.546964
-0.0741875												0.0866645				0.349693
0.0526057												0.0664316				1.40653
-0.0950949												0.0691293				2.33826
0.152422												0.0293378				2.52103
-0.129828												-0.116677				0.8019
-0.024954												0.0647455				0.974554
0.0633966												0.0536173				1.5603
-0.0799202												0.042152				3.94206
-0.104537												0.0263028				0.960728
0.276057												-0.0495106				1.44068
0.0782439												-0.0346746				1.52778
-0.0148933												0.06121				0.339797
-0.107756												0.00653655				0.302707
-0.0126953												-0.0280808				1.70114
-0.0761605												0.0609353				0.660145
0.053792												-0.0621487				1.51789
-0.00939843												-0.0659951				0.599428
0.0818156												-0.0179154				0.712346
-0.0294545												0.00543758				1.85747
0.0117566												-0.0132448				0.859882
0.0419781												0.0194494				0.66619
-0.00307939												-0.0327514				1.14177
-0.0206628												0.102696				0.884609
0.0568141												0.184843				0.960712
0.126873												-0.115998				0.165886
-0.10281												0.0188999				1.79263
-0.0849522												0.109015				0.770866
-0.0113216												0.15627				1.83659
0.00763551												0.0881346				0.449419
0.00159121												-0.0434663				0.801088
-0.125339												0.0702765				1.0772
-0.0695667												0.00131647				0.413703
-0.0684677												-0.0734131				1.52008
0.0388802			0.0715276													1.05122
-0.0393089			0.0108967													1.17386
0.0333933			0.0786606													0.298688
-0.0939041			0.179346													1.04848
-0.100214			0.163434													0.694297
-0.0612567			0.170567													0.624613
0.0992367			0.165629													0.982362
-0.0195558			-0.0703102													0.524476
-0.0461676			-0.048088													1.22708
-0.0779919			0.0786606													1.46
-0.0247685			0.0701559													0.610621
-0.0779919			0.0679611													0.334078
0.141761			0.210896													0.586478
0.0306498			0.202391													0.823789
0.0328446			0.103352													0.49128
0.121459			0.129141													1.39992
0.00870197			0.116246													1.60897
0.00321501			0.235862													2.9733
-0.086771			-0.010228													0.860552
-0.0500084			0.0731737
0.0369598			0.0353137													1.81501
-0.0275119			0.334078													1.78565
0.0311985			0.0704302													1.44436
-0.0124228			0.0742711													0.303077
-0.0335476			0.207604													0.35438
0.0136402			0.237234													0.904447
-0.0198302			-0.029158													0.798549
0.0226937			0.0144633													1.2386
0.0654919			0.165629													1.29567
0.0369598			0.3039													0.883048
0.1146			0.0975906													0.808426
-0.0604337			0.268509													0.594709
0.233376			-0.0722041													0.862989
-0.0555524			0.120865													0.722125
0.111864			0.219425													0.804034
-0.0524021			0.0767608													1.20727
-0.0740043			0.121765													0.76893
-0.0596028			0.441747													0.129866
-0.0596028			0.232476													1.4368
0.200973			0.300883													0.951198
-0.0280997			0.132116													0.76893
-0.0294498			0.0497581													0.583511
-0.00604748			0.192872													0.639767
-0.0528522			0.110514													1.91249
-0.0303499			0.294133													0.698723
-0.051052			0.263079													1.9521
-0.0483517			0.144718													1.01961
-0.0136982			0.0502081													0.704574
0.122665			0.0097041													2.16767
-0.0267495			0.0628094													0.527706
-0.0533022			0.00250338													0.515105
0.018705			0.232026													1.78558
0.0241055			0.196473													0.385042
-0.0564525			0.348588													2.41699
-0.0569026			0.0965628													1.38909
-0.0145983			0.238327													1.77388
0.0511082			-0.00469734													0.546158
0.181621			0.00430356													0.696923
-0.0289998			0.0434575													1.35309
-0.0506019			0.0835115													0.916995
-0.0767045			0.0673099													0.243277
-0.0623031			0.123115													0.539857
0.108714			0.0101541													0.66812
-0.0654534			-0.0542023													0.911594
-0.0205366			-0.00435836													1.16829
-0.0517773			0.513903													0.697443
-0.117606			0.00735691													1.06508
0.0949426			0.0190722													1.09799
-0.00156901			0.0307875													0.701348
-0.137689			0.135109													0.52785
-0.15331			0.0609125													0.929517
0.17416			0.0397134													0.564669
-0.00268475			-0.0166315													1.03774
0.163561			0.436917													2.21875
-0.0830181			0.12451													0.980841
0.0419449			0.303586													0.939
0.355468			0.145151													0.909991
0.0687227			0.0229773													0.590889
0.0508708			0.141804													0.838026
-0.0367148			-0.0422935													0.696327
-0.0149579			-0.00156901													0.49103
-0.053451			0.200938													1.40817
-0.103659			0.335943													0.703579
-0.0651662			-0.0350412													0.467042
0.137899			0.00791479													0.806785
-0.0177472			-0.0155158													3.17104
-0.0696292			0.0419449													1.23132
0.0408291			0.274577													1.74512
0.0876902			0.105542													0.919475
-0.091944			0.413487													1.09186
-0.0305783			0.26063													0.747651
0.0118199			0.24501													0.929517
-0.137132			0.127299													0.871498
-0.0740922			-0.0367148													1.20622
-0.0110528			0.266767													0.150172
0.0464078			0.0291139													1.09576
-0.0550644			-0.0319367													1.14992
-0.0463496			0.158783													1.47203
0.00560385			0.211407													0.831497
-0.0225516			0.245931													0.826134
-0.0423274			0.114874													1.18076
0.0354352			0.128952													0.407824
0.119566			0.181911													0.802336
-0.0158479			0.0635907													0.559998
0.0126427			-0.0124961													0.751053
-0.0295904			0.0418037													1.17439
0.0210223			0.0407982													2.34083
0.0578925			0.060574													0.836525
0.00292238			0.443689													2.60127
-0.0245627			0.0870535													1.58901
0.0444852			0.174201													1.00009
-0.0319367			-0.0463496													0.511061
-0.00914423			0.211742													0.332073
0.131968			0.27241													0.726919
0.0488426			0.135655													1.48008
-0.0440034			0.139677													0.790269
-0.0282497			0.176212													0.924008
0.116885			0.183586													0.653179
-0.0587514			-0.0098146													0.368608
-0.0550644			-0.026909													0.865686
0.0290667			0.16314													0.369949
-0.021546			0.148392													1.1459
-0.0510422			-0.00411648													1.45092
-0.0550644			0.511731													0.444695
0.0364408			-0.00177019													0.616979
-0.0352886			-0.0282497													1.46667
-0.0168535			0.0790091													1.48075
-0.0195349			0.0294019													0.848591
0.0873625			0.0802046													2.19021
			0.027713													0.43492
-0.0116557			0.160533													0.793215
0.0308943			0.30568													0.748279
-0.0363108			-0.0108603													0.916888
0.105257			0.0841812
0.0603214			0.100088													1.34636
-0.0056907			0.399926													0.889052
-0.0231879			0.0511752													0.616255
0.00703453			0.469517													1.13282
-0.0709075			0.21541													1.66489
-0.0617612			-0.0673285													1.20917
0.102871			0.0758303
-0.0398898			0.0499822													0.358569
0.0376546			0.103667													0.725215
-0.0430711			0.0181691													0.302498
0.13031			0.538313													0.935579
-0.0367084			0.858432													0.767367
-0.00648603			0.254381													1.10976
0.0133971			0.254779													0.839742
-0.101925			0.285001													1.36386
-0.0430711			0.332323													2.26258
0.0869649			0.0933275													0.904163
0.000274251			0.411856
-0.056194			0.162123													1.15628
-0.0259715																0.698969
-0.0820421			0.0428242
0.139059			0.106848													0.785262
-0.0975509			0.0519705													0.652442
-0.0589776			0.316019													1.19565
0.0917378			0.137381													1.60884
0.00751476			0.0547884													0.691624
0.0683727			0.0178389													1.27847
0.183025			0.0401172													0.332996
0.0433775			0.0390305													0.959507
-0.00443949			0.0906511													0.991566
-0.0462793			-0.0169371													1.23174
-0.0560601			-0.0185672													0.488401
-0.0169371			0.0808703													1.63221
-0.0136769			0.446018													1.75827
-0.0435625			0.0738065													1.36704
0.0102316			0.16944													0.781824
-0.01096			0.0781535													1.92074
0.0667426			0.275942													0.770956
0.0390305			0.119993													0.942119
0.238992			0.342234													1.4442
-0.0174805																1.06873
0.0683727																1.15621
0.03251																2.07832
																0.51394
-0.0169371																0.767153
-0.00335274																1.33824
-0.00172261																1.52788
-0.0115034																1.28336
-0.0538866																1.32792
-0.00443949																0.598706
-0.0229142																1.59417
-0.0446492																0.77965
-0.000635864																1.37682
-0.0511697																0.572624
0.00588463																0.842682
-0.0386721																0.904626
0.0118618																1.22467
-0.0691011																0.418306
-0.0647541																0.354188
0.0172955																0.56067
-0.041389																1.59091
0.0200124																2.29675
-0.0473661																0.462863
-0.0348685																0.462863
-0.0354118																0.46558
-0.0386721																0.288439
-0.0522565																0.219974
-0.0582336																0.619355
-0.00280936																1.15512
-0.0435625																0.331366
-0.0375853																1.2513
0.080327																0.366142
-0.0120242						-0.00112849										1.94578
-0.010779						0.0714059										0.976996
-0.0472018						0.199664										0.416645
0.145497						-0.0188729										1.19833
0.0549067						-0.0521827										1.8885
-0.0998126						0.070472										1.30947
0.0371622						0.0508597										0.677519
-0.0185616						0.254454										2.61011
-0.0403531						0.0433883										1.53766
-0.0468905						0.127441										1.26931
-0.0400418						0.0580197										0.993807
-0.0640124						-0.033193										0.649813
0.074519						0.11063										2.11544
0.112498						0.00727679										0.443106
-0.0848699						-0.0403531										2.10424
0.0443222						0.0159934										0.554553
0.020663						2.14227										0.318894
-0.0643237						0.241229										1.0486
0.0486805						0.650468										0.804221
0.0966217						-0.0453409										0.550195
-0.0851812						0.053817										1.23382
-0.0238538						0.137301										1.00315
0.074519						0.113789										1.60895
-0.00704331						0.430004										1.62732
-0.00828853						0.170353										3.50729
0.138025						0.192843										1.57315
0.147053						0.387751										1.03303
0.0247099						-0.147566										0.611834
0.0309361						0.147523										0.964855
0.203088						0.773479										3.41203
-0.0475131						-0.027622										0.576967
0.0175499						-0.00717703										0.975751
-0.0515601						0.483842										1.07412
-0.0344383						0.967706										1.27585
-0.017939						0.0677877										1.24192
-0.0291461						0.394907										0.505678
0.00852201						0.634113										0.86119
0.00478634						0.0350758										0.921272
0.0645572						0.0412093										2.10517
0.00229588						0.17342										0.651992
-0.0132694						0.399677										0.643276
0.0228421						-0.183344										2.25055
0.184099						0.0398463										0.968902
-0.0204295						0.0418908										1.98594
-0.0303913						0.114811										1.17187
-0.00237371						-0.0862308										3.19381
0.0611328						0.240888										0.570119
0.035917						0.0391648										0.537743
-0.0574749																1.8278
-0.101992																1.58591
-0.112887																0.278113
-0.0487584																1.54233
-0.0802003																2.01116
-0.10386																0.711452
0.00509764																0.157326
-0.130321																0.291811
-0.0736629																0.378977
-0.0114016																0.8422
0.0078994																0.577279
-0.00828853																0.453067
0.0804338																0.671293
0.0175499																1.18277
0.282472																1.71635
-0.0406644																0.992561
-0.00642069																0.662888
0.13678																0.37026
-0.0979448																0.514706
0.0122577																1.77954
-0.0552958																0.990694
-0.0198069																0.446841
0.0586423																0.839399
-0.0649463																0.209626
-0.075842																0.429408
0.0658024																0.641408
-0.0310139																0.422248
0.0601989																0.488868
0.0695381
-0.0347496																0.36061
-0.10386																0.403258
-0.0543619																0.231417
0.0418318																0.0673589
-0.0528053																0.731998
-0.00112849																0.43688
0.0222195																1.19273
0.0810564																0.49416
-0.00859984																0.426606
-0.0789551																0.738847
-0.0338157																0.263793
0.0321813																1.30231
0.0256439																0.873331
-0.0665028																0.415088
-0.0319478																0.967968
-0.00735461																0.353761
-0.0957656																0.445907
0.0107012																0.323875
-0.0742855																0.453067
-0.173122																1.49314
-0.0204662																0.731226
-0.130187																0.2644
-0.0548819																0.885926
0.115833																1.48564
0.0466613																1.1466
0.21874																1.02495
0.0415501																0.946239
-0.00888077																0.741108
-0.0841863																2.63499
0.0173569																0.947602
-0.142114																1.09276
-0.159492																1.5313
-0.0497706																1.5003
-0.00683628																1.57083
-0.187433																1.66897
-0.134276																0.765982
0.00168245																0.125374
-0.0450002																1.26961
0.0432538																0.481457
0.343454
0.0156532																0.831065
-0.162899																0.0882327
0.189776																0.916253
-0.0596524																0.961913
-0.105653																2.04618
0.063358																0.710781
-0.0688526																0.175464
-0.163922																1.02836
0.404448																0.234073
0.421485																0.922045
-0.165625																0.777227
0.0033074																1.33757
-0.0646868							0.294007									0.492077
-0.113301							0.139624									0.647117
-0.0114739							0.0538924									1.67951
0.0430528							0.184954									0.96278
-0.0679715							-0.0538471									1.4302
-0.0584458							0.208275									1.35826
-0.0288831							0.0328701									0.377439
-0.02954							0.228641									0.470726
0.00494977							0.0236728									0.945371
-0.144506							0.0479799									1.83751
-0.136951							-0.0495769									1.18154
-0.00161972							0.102507									1.33297
-0.0416936							0.0154609									0.54529
							0.00593519									0.755513
-0.0121309							0.0430528									0.885261
0.266415							0.318971									1.60593
0.0532355							0.51934									0.38171
0.132069							0.331125									2.07335
0.0637466																1.37469
0.00593519							-0.0400512									0.824493
-0.0384088							0.247364									1.26235
0.0305708							0.110062									0.720695
0.0489653							-0.0347956									0.769966
0.117616							-0.0449783									1.05935
0.00494977							0.119587									0.484194
0.0883822							0.13404									1.32377
-0.0499054							0.116303
-0.0259268																0.4612
-0.0377519							-0.0104885									0.419156
0.00610198									0.190332							0.804834
0.120841									0.397994							0.703023
-0.0997492									0.12367							0.498997
0.284466									0.66545							0.39153
0.105489									0.112761							0.587476
0.0303427									0.216996							1.48761
-0.0456116									0.425467							0.833519
0.128518									0.32002							0.898161
-0.0387434									0.183867
-0.145807																0.474756
0.0315548									0.218612							2.0597
0.0869044																0.122458
-0.150655									0.00973809							0.688479
-0.130858									0.071552							0.675146
0.0166063									0.00327389							1.21975
-0.130858									0.674338							1.53084
0.0755921									0.217804							0.152758
-0.058944																0.831903
-0.100557									0.107105							0.959571
0.3382									0.0788242							2.3223
-0.0763165									0.12569
0.0198384									0.149122							0.416982
0.287699									0.0614517
									0.91917							1.47347
									0.349512							1.19188
-0.180956									0.156799							0.793926
-0.114698									0.105489							0.867456
-0.0722764									0.244065							1.29531
									0.212956							1.50943
0.00771803									0.0263026							1.44681
-0.0573279									0.316787							0.595152
-0.136514									0.517581							2.16676
0.198815									0.513546							1.13955
-0.14935									0.0535541							0.703768
0.159617									0.270292							1.43468
-0.127445									0.082952							0.822513
0.0800699									0.146936							1.89986
-0.0870951									-0.119952							0.439763
0.106009									0.131372							2.63769
-0.017347									0.118691							0.0662355
-0.122257									0.280092							0.983338
-0.0778722									0.17691							3.02045
-0.103812									-0.033487							2.31835
0.0385668									-0.128022							0.648431
0.0253089									-0.0138884							1.52634
-0.0231113									0.606352							0.300843
0.112926									0.0472133							1.23985
-0.172983									-0.0444392							0.85537
0.103704									0.0864106							2.24169
0.00571027									0.219566							0.881309
-0.0836366									-0.0957416							0.488183
-0.172407									0.169993							0.539486
-0.178171									0.276056							0.26741
0.0864106									0.0610477							-0.0311813
0.150394									0.858828							0.213802
0.0743056									0.0927514							0.544097
-0.00985337									0.0558598							1.14762
0.0587419									-0.0444392							0.705498
-0.0438628									0.114656							0.448409
0.0915985									0.146936							0.624797
-0.0796015									0.491065							1.19258
0.213225									-0.0513564							1.62202
-0.148773									0.0869871							-0.0461685
0.0921749									-0.130327							1.12341
0.0471187									0.054134							0.859897
-0.0981992									0.158863							1.96932
-0.076151									0.0365957							1.65514
-0.0611181									0.3127							1.04681
-0.0831663									0.267601							1.31389
0.197949									0.0160507							1.39256
-0.0561071									-0.0225337							0.656452
-0.0646257									0.0962261							0.535186
0.0125431									0.0300814							0.695036
-0.040072									0.298168							0.957109
-0.0170216									0.0230661							0.542202
0.204964									0.197949							1.01624
-0.0385687									0.172894							1.41361
0.111259																0.47756
0.122784									0.0506264							1.24173
-0.066129									0.0426088							0.790745
-0.066129									0.193439							0.391873
-0.0836674									0.0601472							1.01223
0.0857031									0.292656							0.442484
-0.00599749									-0.0305512							1.32091
0.00302224									0.012042							0.622377
-0.0505951									0.158863							0.388365
0.0531319									-0.0275446							1.67869
0.095725									0.181914							0.881945
-0.104713									0.3127							0.731616
0.00252114									0.0636549							1.14302
-0.0901816									-0.000986533							0.705559
-0.00399311									-0.029549							1.80146
0.18041									0.248559							0.624381
-0.00850298									0.209474							1.93625
-0.0310523									0.311196							1.43516
-0.07114									0.132806							0.320216
0.127567		0.93825														0.640919
-0.0953301		0.256208														1.39739
0.00701654		0.443507														0.330238
-0.129311		0.464138
-0.0382911		0.102486														1.35856
-0.0354594		0.193101														1.35694
-0.00147864																0.887279
0.143344		0.751356														0.475061
0.0705281		1.77604														1.04707
0.131613		0.0883276														0.944318
-0.128097		0.649819														0.856535
0.00499388		1.05031														0.988817
-0.115152		-0.135379														0.975467
-0.00956928		0.396986														0.852489
0.578216		0.74367														0.61786
-0.143065		0.0907547														0.210092
-0.0924984		0.372714														1.33388
0.138894		0.00135309														0.737602
-0.0200871		0.234364														2.43421
0.0903502		0.299898														0.744075
-0.126479		0.197551														0.689058
-0.137806		0.313652														1.44715
-0.173809		0.768751														1.02482
		0.37595														1.33793
-0.0346503		0.484365														1.83874
-0.056495		0.130803														0.785741
-0.0221098		0.477488														1.24853
-0.14347		0.0644601														0.794641
		-0.181496														1.7995
0.246904		0.457666														0.527245
-0.0362684		-0.00835569														0.923282
		0.285739														0.394559
-0.0954414		0.0251677														1.80596
0.00979006		-0.024282														0.589618
-0.0803652		-0.0643845														0.776562
-0.0423734		0.0972316														0.645098
0.132811		0.0372286														1.0012
0.000141339		0.162662														0.698166
0.0212479		-0.00196932														0.290809
-0.0848881		0.0504956														0.885713
-0.0547358		-0.0131257														0.219047
-0.0351368		-0.0158394														0.266386
-0.00106475		-0.00287389														1.52766
0.0302936		0.0776327														1.93471
-0.0628769		-0.0876018														0.939385
-0.0471977		-0.0628769														0.707212
-0.0664952		-0.0854911														1.09949
-0.011015		0.0520032														0.840184
0.300458		0.0806479														0.772039
-0.0655906		0.608313														1.31689
-0.0888079		0.00164895														0.997277
0.364381		0.0526063														0.323072
-0.0701134		0.115625														0.683693
0.0643657		0.2097														3.94647
-0.037549		-0.0607662														0.490719
-0.0764454		0.081854														2.00316
-0.0164424		-0.057148														1.26985
-0.0797622		0.0637626														0.808825
-0.0140302		-0.0402627														1.26141
0.0800449		0.00104591														0.708418
0.042053		-0.0336292														0.726208
-0.0553388		-0.0707165														1.11698
-0.0749378		0.00466418														0.819378
0.115021		-0.0224729														0.528409
-0.0641572		0.00964079														1.59934
-0.0138628		0.0423486														0.892916
0.0323226		0.0227897														1.35609
-0.0468994		-0.0758269														0.865139
0.0946154		0.0255838														1.1148
0.034788		0.0267343														0.0850824
-0.0971938		0.172194														0.960797
0.174823		-0.0192867														0.584904
0.00421688		0.10875														2.45056
0.0456358		0.422844														1.15047
-0.0646503		-0.0370377														0.727405
0.00947643		-0.00137139														1.42216
-0.0217521		0.272618														0.774905
-0.0237245		0.140965														0.836212
-0.0602126		-0.00794582														0.312394
0.0196668		0.0793298														0.561729
0.196519		-0.0822369														1.24646
-0.028984		0.107929														1.01553
-0.0363803		0.12683														1.02802
-0.0493648		0.168906														1.03114
-0.098673		0.387671														1.66574
0.0139142		0.0186806														0.352333
-0.0250394		0.0333088														1.23101
0.102998		0.0280492														0.967207
0.0418555		0.0411981														1.70042
0.0267343		0.132583														1.33916
-0.0853598		-0.0598839														0.877959
-0.0651434		0.0287067														0.643909
-0.034901		0.132418														0.591478
-0.00252191		-0.0562679														0.693875
0.00405252		0.0273918														0.920858
0.0172014		-0.0123836
0.00589338					0.257073											1.09556
0.0148351					-0.045318											0.944769
-0.0331248					0.160341											0.678958
-0.0197123					0.322104											1.33942
0.0091449					0.0660465											0.537923
-0.0733624					0.316413											1.11182
					-0.0306862											1.80602
0.113193					-0.00426762
0.12498					0.161966											1.23537
-0.0306862					0.079459											0.889494
-0.0176801					0.199359											0.895184
0.038815					0.0778332											1.66986
-0.0440987					0.515569											0.511098
0.0319055					0.368031											0.433062
					0.259918											0.665139
-0.0583241					0.145709											0.926886
0.0270282					0.355432											0.725698
0.0140222					0.226184											1.71416
-0.0144286					0.135548
					0.258293											0.99151
-0.0534468					0.0205252											0.82487
0.0831169					0.035157											1.00167
-0.0717366					0.0107707
-0.00264186					0.0892135											1.24472
0.0258089					0.0367828											1.04516
-0.0144286					0.0132093											0.992729
-0.0603563					0.0786461											0.474518
					0.028654											0.571658
-0.0749881					-0.096123											0.80089
0.0802719					0.0384086											1.87186
-0.0103009					-0.026868											0.985078
-0.04614					0.137113											0.34268
-0.0742026					-0.0305872											0.923543
-0.0748788					0.0285811											1.32555
-0.0586498					-0.0620309											1.11694
-0.0968556					0.00423757											0.474203
0.104655					-0.0843458											1.29546
-0.0272061					-0.0319396											0.99556
0.000518427					-0.0201059											0.441745
-0.114775					0.0407528											2.19583
-0.0359968					-0.0322777											0.80115
-0.0512115					0.0103235											0.964116
-0.132357					0.0515722											0.473526
-0.105308					0.209467											1.63559
0.192224					-0.0113152											1.54701
-0.0532402					0.000518427											0.696337
0.0715203					0.0123521											1.0882
0.0921447					0.0688155											0.473865
0.331861					0.23212											1.57608
-0.0965175					0.0549532											3.66286
0.0945114					-0.0217965											1.01889
0.00153274					0.0742252											1.6623
0.0772681					0.118855											0.256802
-0.0813028					0.102288											0.579353
0.201352					0.144213											0.689237
0.0059281					0.0235095											0.39982
-0.0353206					0.0803111											0.411653
-0.0248394					0.0972163											0.780525
-0.0769075					-0.0288967											0.353499
0.0224952					0.0786205											0.832593
0.0794597								0.118066								1.26067
0.0203107								0.106024								0.519358
								0.0366033								0.915338
0.0387284								0.459501								0.786768
-0.0165246								-0.0285669								0.86221
-0.00766995								0.132942								0.346516
-0.0671731								0.0114561								1.88899
0.0992941								0.31216								2.6852
0.0142896								0.0259777								1.24756
0.0507707								0.154547								2.39513
0.0482914								0.300826								2.22476
-0.000586238								0.320306								1.18062
0.0465205								-0.00129461								0.503774
-0.0522973								0.279929								0.471189
0.0922104								0.115587								0.240968
-0.0328171								-0.0388383								0.419124
-0.137656								-0.0335255								0.662803
0.000830504								0.172965								1.15229
-0.0360048								0.294805								0.965278
-0.042026								0.418061								1.23623
-0.0140453								0.00968515								0.305784
-0.129156								0.114878								0.450646
0.00295562								-0.0260876								0.50342
-0.0756736								0.0649381								1.59077
-0.12526								0.0451037								0.570715
0.176152								0.167652								1.17779
0.102836								0.489253								0.994675
0.0851267								0.0957523								0.890545
-0.0774445								0.268949								1.25925
-0.0434427								0.576028								0.291617
-0.0465542													0.111911			0.999496
-0.0550116													-0.0345358			1.00128
-0.0372065													0.235657			0.971007
-0.124452													0.491605			1.51718
0.0455872																0.437299
0.00419034													0.248565			1.07027
-0.131128													0.465342			2.13413
													-0.0465542			0.835689
-0.119555													-0.106646			0.832573
-0.0732619													0.048258			0.946525
0.133722													0.171558			0.720846
-0.0741521																0.835243
-0.115104													0.0794169			0.92783
-0.112433																1.26034
0.0705143																0.625143
-0.0581275																0.669211
-0.103976													0.0682887			1.23096
0.0313431													0.0901			3.27499
-0.0919572													0.0901			0.207168
0.17868													0.172003			0.639832
-0.0679203																0.627369
0.185802																0.710608
0.0745205													0.255687			0.94519
0.191144													0.00285496			1.08273
-0.0251881																1.3556
0.232986																0.703931
0.0749656																1.10321
-0.0127245													-0.0225173			0.838804
0.0731851																0.918482
-0.0478896													0.083423			0.577069
-0.0758769																0.723923
-0.120866													0.338395			0.661439
0.112826																1.26879
0.00660252													0.0922061			1.16006
-0.0677539													0.110327			1.30753
-0.0983712													0.0197242			0.653941
-0.12274													0.0615888			0.521474
-0.0577564													-0.0458844			0.957615
-0.00401983																0.959489
-0.071503													0.0190994			2.05172
0.0197242													0.332146			1.15194
0.0753353													0.321524			1.28441
-0.0677539													0.0297217			0.975735
0.000978922													0.0503416			2.16106
-0.0346372													0.00722736			0.49523
-0.0177664																0.993231
-0.0508831													-0.108369			0.635195
-0.0771266													0.110951			0.572086
0.0503416													-0.0933725			0.930122
-0.0465092																0.866388
0.0790844																0.837645
0.0078522													-0.111493			1.42937
0.219049													0.29653			0.880134
0.151566																0.725798
0.032846																0.480234
-0.0252645													-0.0815005			1.31253
0.0622136													0.335895			0.044718
0.236545																0.836395
-0.113992													0.0884571			0.783283
-0.0021453													-0.0108931			2.33852
														0.0150512		1.41757
0.0334236														0.0464256		1.38309
-0.000494641														0.0899541		1.69005
-0.012366														0.00911553		1.13944
0.0729949														-0.103945		0.649605
-0.0414792														0.260959		0.173336
														0.0224002		0.518172
0.00685432														-0.0460016		0.599859
-0.0479802														-0.0101048		0.612295
-0.0375221														-0.0762454		0.767754
-0.0428925														-0.0539159		0.487928
-0.0166058														-0.0250854		0.998116
-0.0369568														-0.00529973		1.1516
0.00883288														0.0944765		1.47184
0.000635967														0.0515134		1.68129
-0.051372														0.12359		0.437051
-0.0604169														0.196797		1.2412
-0.0440231														0.0404899		0.840396
-0.0219762														0.0190084		0.933954
0.0534919																1.25024
0.116241														0.0467083		0.891556
-0.00388647														0.150159		1.76749
0.0486868														0.242869		1.58914
-0.0909434														0.132635		0.755883
0.17588														0.0876929		0.918973
0.0444471																1.39185
0.0416205														0.0650807		1.56285
-0.0787893														0.403415		0.739489
-0.0276293														-0.0106701		0.262372
0.0122247														-0.0858556		0.675609
-0.130894														0.345916		1.76972
0.016122														0.446134		1.4545
-0.126038														0.150777		3.32333
0.43024														0.355628		1.30439
-0.0514261														0.174176		0.961795
-0.055841														0.11016		0.67306
0.152543														0.0858776		0.61081
-0.0456867														-0.0721761		1.67304
-0.144139														-0.00551102		0.840385
0.175942														0.208171		0.463794
-0.128687														-0.0214047		0.511916
-0.02891														0.090734
-0.118091														-0.077474		0.506177
-0.156501														0.180357		1.081
0.0452604														0.128702		0.441719
0.196692														-0.0271441
-0.0977826														-0.170629		0.362692
-0.0968996														-0.0514261		0.812571
0.0028773														0.170202		1.12647
-0.0924847														0.170644		0.90087
-0.0973411														0.119431		0.35607
0.265564														0.0660105		0.997115
-0.0779155														-0.125155		0.789614
0.0527658														0.130468		1.04568
0.039521														0.1755		0.794912
0.0955904														-0.00242059		1.2183
-0.0933677														0.0810212		1.70438
														0.164463		1.22757
-0.0708517														0.626704		0.407283
0.139739														0.324724		0.640831
0.0510994														0.0204944		1.77591
-0.0800649														-0.0046454		1.67371
0.0314248														-0.00901754		2.78478
0.188275														-0.0177618		1.18403
0.00519192														-0.0800649		0.457162
-0.102472														-0.00737799		1.22283
-0.0756927														0.186636		1.14632
-0.117775														0.0133897		0.80748
-0.022134														-0.0401691		0.41672
0.177345														0.0450877		1.60102
-0.068588														-0.0215875		1.34307
-0.0669484														-0.0598437		0.521105
-0.103019														0.147833		0.559907
0.158763														0.084437		0.45115
-0.116135														-0.0101106		0.587233
-0.0827974														0.0122966		0.586687
-0.0478203														0.173519		1.9344
0.00956406														0.136356		1.8557
0.227625														0.119961		0.780701
0.14838														0.175705		0.875248
-0.0745997														-0.00792451		0.133077
0.201392														0.230904		0.619478
0.000273259														0.544058		0.348952
-0.0784253														0.084437		0.843004
0.0194014														0.0718671		0.508535
-0.0745997														-0.00847103		1.354
0.0117501														0.752282		0.283916
-0.0871696														0.246206		1.54583
0.0571111														0.147833		1.33432
-0.0893557														0.0707741		0.46372
-0.0855756															0.117067	0.706066
-0.0964315															0.17747	0.984143
0.195285															0.254018	1.08574
-0.0530081															0.206141	0.96605
-0.05607															0.0945201	1.31511
-0.0360284															-0.0201622	1.64106
0.0586123															0.0541586	0.771201
-0.0424306															-0.0212756	0.662643
-0.00596608															-0.00624443	1.63132
0.025488															0.116789	0.764521
-0.0452141															0.0174158	1.31566
0.0541586															-0.022389	0.587209
-0.0365851															-0.00234746	0.510661
-0.00819292															-0.0243375	1.88935
-0.0257293															-0.0109765	1.23438
0.161047															-0.0563484	0.821305
-0.00902798															-0.022389	0.905369
0.0566638															0.0959119	0.552693
-0.10339															0.0204777	1.11386
0.0878396															0.088953	0.432443
0.0065599															-0.0407605	0.829099
-0.0530081															-0.115638	1.03536
0.0435811															0.0814374	0.235368
0.0369006															-0.0132033	1.22743
-0.00791456															-0.0151518	0.687973
-0.0015124															0.0316119	1.14364
-0.0226674															-0.0660908	1.97843
-0.0705445															-0.00986305	0.793191
0.0499833															0.117345	0.550744
-0.0168219															0.0566638	1.62798
-0.0347229																0.711416
-0.0353286															-0.0301807	0.816191
0.00464318															-0.029575	0.874937
0.0243262															0.054305	1.88453
-0.0392652															-0.0201877	0.596649
-0.0668214															-0.0462299	1.66832
0.125164															0.0703543	0.85162
-0.0586454															-0.036237	0.898859
0.119713															0.031291	1.04149
-0.0120117															-0.0313919	1.37701
0.00615726															-0.0610679	0.866155
-0.0498637															0.0334107	0.646311
-0.02473															0.0709599	0.878571
0.0013122															-0.00928636	0.818007
0.0228122															-0.047744	0.997275
-0.0368426															-0.0301807	1.74251
-0.000201877															0.031291	1.57838
0.0315938															-0.0465328	1.22469
-0.0453215															-0.039568	0.898557
-0.0413849															0.373776	0.607853
0.00736853															0.0291713	0.962754
0.0812557															-0.0435046	1.5702
-0.0643989															-0.0153427	0.870697
0.019784															0.0603614	0.646614
-0.018068															0.0288685	0.701726
0.125467															-0.0338145	0.278389
-0.0486525															-0.0538003	0.613304
0.0530938															-0.0262441	0.985768
-0.0607651															0.0467346	1.66377
0.0143333															0.632684	0.727465
