# Supplementary material for: Large-scale phenotypic drug screen identifies neuroprotectants in zebrafish and mouse models of retinitis pigmentosa
Source: eLife. 2021 Jun 29;10:e57245. doi: 10.7554/eLife.57245 (PMC8425951; doi:10.7554/eLife.57245)
Supplement: Figure 8—figure supplement 1—source data 1. [file elife-57245-fig8-figsupp1-data1.xlsx]

## Sheet: qPCR
parp1KD	ripk1lKD	casp3aKD	casp3bKD	tdp1KD
0.242446	0.432024	0.347939	0.308491	0.488745
0.243291	0.364535	0.556739	0.279957	0.498235
0.159929	0.383284	0.469566	0.249744	0.526008
	0.348986

## Sheet: WB quantification
	PAR Mean		Actin Mean		PAR/Actin Ratio
Experiment	Mtz	noMtz	Mtz	noMtz	Mtz	noMtz
1	138.371	107.348	212.095	215.989	0.652401	0.497007
2	121.157	104.564	213.611	219.547	0.567185	0.476272
3	139.883	120.221	215.463	215.526	0.649221	0.557803
