# Supplementary material for: Large-scale phenotypic drug screen identifies neuroprotectants in zebrafish and mouse models of retinitis pigmentosa
Source: eLife. 2021 Jun 29;10:e57245. doi: 10.7554/eLife.57245 (PMC8425951; doi:10.7554/eLife.57245)
Supplement: Figure 8—source data 1. [file elife-57245-fig8-data1.xlsx]

## Sheet: parp1KD
gmc500-2.5mM Mtz	parp1-2.5mM Mtz		gmc500-0mM Mtz	parp1-0mM Mtz
0.209767	0.187396		0.298641	2.13242
0.0705299	0.306403		2.31268	1.05031
0.258876	0.360118		2.11464	0.38706
0.193815	0.253765		0.924409	0.33157
0.100155	0.527051		2.06633	0.674649
0.0838611	0.460547		1.64065	1.14432
0.0651747	0.450719		0.545211	0.654367
0.110637	0.300883		1.28993	0.824596
0.0911534	0.145259		0.491659	0.341369
0.056629	0.440623		0.501002	1.46894
0.186523	0.220782		0.697095	0.426598
0.162253	0.112949		0.854449	0.730139
0.243038	0.421102		0.902646	0.93022
0.080215	0.431468		0.542818	1.56077
0.0826077	0.236803		1.70058	0.483683
0.15986	0.694388		0.230162	0.276992
0.0794174	0.538225		0.716124	0.597055
0.129552	0.371695		1.12483	1.73123
0.0806707	0.195473		0.693791	0.94264
0.10608	0.485048		0.734582	0.754408
0.0963947	0.238418		1.24732	0.725923
0.0993572	0.255111		0.37202	0.858095
0.161569	0.20382		0.558542	0.771841
0.145731	0.655751		1.43988	0.513763
0.206716	0.86977		0.472606	1.02552
0.152956	0.451685		1.1407	0.729911
0.400487	0.398371		0.539442	1.22497
0.105669	0.245247		1.787	0.859488
0.271835	0.551123		1.77062	1.6462
0.339991	0.34952		0.602051	0.485287
0.446717	0.283435		1.02116	1.41914
0.562029	0.829846		1.10028	1.21929
0.141333	0.905727		0.693984	0.553311
0.185054	0.4621		0.750517	0.624374
0.411054	0.603818		1.21348	1.02301
0.254135	0.359687		1.53009	0.812994
0.341708	0.549635		0.667038	0.657924
0.162863	0.468176		0.911399	0.987613
0.190337	0.545296		1.32708	1.34979
0.0956308	1.03926		1.15497	2.19568
0.193375	0.801081		0.624506	0.375126
0.0832146	0.234832		0.375391	1.09394
0.332727	0.438171		1.44622	1.48439
0.0871772	0.509711		0.831222	1.74487
0.189677	0.305133		1.53287	0.810352
0.325858	0.844725		0.788029	0.77733
0.341576	0.491609		0.719344	1.40197
0.184174	0.230451		0.366129	0.765431
0.254848	0.165133		0.634623	0.819462
0.316313	0.313324		1.32738	0.693204
0.460545	0.506932		0.843649	0.728485
0.28902	0.525099		1.38452	0.800823
0.234433	0.240453		0.923532	1.09983
0.218235	0.329041		0.77941	1.21876
0.261616	0.307711		0.846534	0.81802
0.363799	0.367416		0.727265	0.678891
0.144565	0.223409		1.13633	0.981114
0.310322	0.188709		0.886808	1.15486
0.345381	0.439776		1.21688	0.735697
0.228331	0.464781		0.910107	1.53486
0.237207	0.186974		1.01784	0.666243
0.120933	0.40824		2.26711	1.17039
0.163316	0.172073		1.41781	0.704631
0.15566	0.29975		1.47439	0.762102
0.170638	0.155846		1.83797	2.8051
0.137798	0.38201		0.648381	1.63549
0.129365	0.257191		0.701968	0.90456
0.205587	0.356291		0.684771	1.63626
0.206807	0.214632		1.2222	1.54418
0.229108	0.289646		1.61696	0.716614
0.188057	0.233513		0.545975	1.18237
0.100408	0.311385		0.837547	0.749565
0.185727	0.209835		1.85949	0.805039
0.120933	0.213305		0.66358	1.98996
0.111503	0.559289		0.801267	1.3032
0.145897	0.377418		0.918983	0.544755
0.191053	0.354148		0.133027	1.57014
			0.367571	0.979671

## Sheet: ripk1lKD
Gmc500-2.5mM MTZ	ripk1l-2.5mM MTZ		Gmc500-0mM MTZ	ripk1l-0mM MTZ
0.347788	0.142793		0.927196	0.47194
0.290165	0.108076		2.03545	0.458225
0.156494	0.304109		0.683294	0.631198
0.130293	0.407032		0.539184	1.20498
0.0762514	0.362992		0.393641	0.329058
0.203371	0.41243		1.28798	0.859235
0.0780937	0.427519		1.67436	0.885846
0.26734	0.346063		0.848079	1.35942
0.0717479	0.569698		1.35103	0.888917
0.171949	0.249396		1.29965	1.1582
0.235816	0.674339		0.661289	0.251783
0.240934	0.127581		1.50271	0.546963
0.133465	0.401512		0.134591	1.27232
0.229675	0.36839		0.825357	0.879501
0.156187	0.784132		0.734572	0.738564
0.315548	0.570189		2.3466	0.70182
0.161919	0.163893		0.53683	1.12627
0.138992	0.237742		0.581353	0.78933
0.110232	0.176773		0.636827	1.29873
0.248816	0.34472		0.708725	0.691525
0.47965	0.116027		0.782608	0.482191
0.175715	0.337802		0.721625	0.428441
0.273835	0.363893		1.20636	0.95246
0.152261	0.165639		0.454436	1.06035
0.137992	0.177697		0.71283	0.356904
0.207966	0.196474		1.20597	0.848672
0.280285	0.132235		0.750358	0.665725
0.217543	0.475571		1.64574	1.26949
0.0729053	0.139153		0.999956	1.65434
0.172197	0.229484		0.650479	0.565456
0.241389	0.35144		1.59375	0.623702
0.209334	0.193905		0.486491	1.10179
0.698953	0.167023		0.947182	0.812904
0.599661	0.242134		1.74113	1.31601
0.198975	0.211101		0.486491	1.4024
0.366481	0.228891		1.01989	1.64105
0.204643	0.139746		0.905159	1.13541
0.196238	0.388205		1.09104	0.700712
0.277353	0.352033		1.71005	1.19307
0.192329	0.282061		0.877013	1.3162
0.166334	0.213078		1.30272	1.5359
0.140924	0.270992		1.22061	1.3706
0.206234	0.274734		1.51733	1.66446
0.157931	0.155527		2.54551	0.876756
0.455564	0.296409		0.906181	1.56954
0.0986904	0.255696		1.39104	0.648388
0.316903	0.147619		0.460642	0.585502
0.510508	0.0231386		1.99203	1.17634
0.198162	0.101927		0.488114	0.862825
0.304664	0.0950441		0.701639	0.730413
0.109497	0.185988		0.562978	1.08468
0.100123	0.288061		0.490978	0.54449
0.309742	0.206197		1.07817	0.876365
0.284614	0.27532		0.513893	0.187746
0.125902	0.129606		0.593184	0.675469
0.304404	0.319401		0.813349	0.797335
0.21678	0.137807		0.950188	0.931179
0.312216	0.475953		0.774159	0.53173
0.0602818	0.483275		0.886856	1.1091
0.141916	0.167096		0.708022	0.062607
0.25317	0.36214		2.29924	1.74721
0.277085	0.107517		0.845423	2.22795
0.125823	0.365334		1.48535	0.556151
0.272058	0.411175		0.376556	0.373205
0.156594	0.166137		0.870557	0.869643
0.11973	0.194058		1.16166	1.43113
0.200007	0.167804		0.17335	0.857761
0.0833236	0.156274		1.30256	0.812063
0.189344	0.0816793		1.12936	0.711221
0.112875	0.236842		1.38939	0.646634
0.0813434	0.337413		0.552495	1.63844
0.198636	0.165998		0.584484	1.99824
0.179138	0.138633		0.712897	1.96443
0.331467	0.130715		1.64484	0.504512
0.2617	0.215172		0.876955	1.1318
0.201835	0.168776
0.244792	0.131131
0.378079	0.433956

## Sheet: casp3KD
Gmc500-2.5mM MTZ	casp3-2.5mM MTZ		Gmc500-0mM MTZ	casp3-0mM MTZ
0.243173	0.29633		0.615682	0.824784
0.0888517	0.23302		0.580676	1.218
0.187724	0.149198		0.542062	0.841486
0.155524	0.215902		0.930738	0.904283
0.230747	0.2221		0.871949	0.786839
0.253595	0.290869		0.616751	1.40199
0.194538	0.217082		1.55778	0.563173
0.0956659	0.252205		0.829995	2.46821
0.192802	0.241284		1.49538	0.746488
0.276843	0.118502		1.1548	1.35496
0.0998079	0.221952		0.807816	0.51868
0.143766	0.409519		1.85146	0.720567
0.199215	0.246154		0.872751	0.879832
0.098739	0.385169		1.64596	1.42991
0.232083	0.315957		1.03843	0.789511
0.239031	0.201144		2.23586	1.10483
0.226204	0.166759		0.785102	1.9844
0.198948	0.208375		0.739139	0.945168
0.149912	0.081166		0.920985	0.37919
0.121854	0.189633		1.21814	1.07344
0.282188	0.111566		0.300626	0.710012
0.16501	0.289394		1.13356	0.806346
0.284994	0.153477		1.42604	0.873285
0.0815031	0.136654		0.380526	0.317461
0.140693	0.234201		0.617286	0.678613
0.145236	0.189043		1.12808	0.968016
0.117311	0.11437		0.875156	0.446129
0.0805678	0.0500278		1.18393	1.21787
0.362221	0.270061		1.0586	0.614079
0.365294	0.114961		2.0786	1.46906
0.54273	1.08659		1.23003	1.24473
0.360484	0.210736		0.40324	0.545135
0.140559	0.231397		0.315591	0.823181
0.154054	0.146541		0.46243	1.38047
0.452275	0.16912		0.589628	0.422213
0.229144	1.48917		0.949444	1.5054
0.180242	0.212802		0.375582	0.272568
0.57787	0.62306		0.416735	0.758246
0.187323	0.583657		2.23693	0.336701
0.211908	0.158347		0.799532	0.567716
0.338438	0.187567		1.29951	0.788308
0.0980709	0.171039		1.42751	0.344852
0.163842	0.321863		1.11473	2.98115
0.0538635	0.291268		1.6918	1.76335
0.112711	0.0650002		1.01617	1.69855
0.43943	0.0699312		0.614044	0.913429
0.313534	0.153087		0.935296	0.630284
0.0736403	0.0271208		1.58986	0.50487
0.114159	0.261009		1.00395	2.20921
0.206129	0.123949		1.4929	1.85065
0.127182	0.175276		1.46557	1.8119
0.137794	0.0916727		0.786729	1.20703
0.195838	0.168552		0.814384	1.58311
0.373025	0.127199		0.66212	1.48117
0.0892366	0.40076		0.948481	1.03691
0.114962	0.0596209		0.679324	3.88863
0.155159	0.110164		0.413704	1.76479
0.0982407	0.0617502		1.22166	0.501654
0.244878	0.108259		0.577063	0.244717
0.158375	0.0653364		1.34707	0.695242
0.161108	0.0655605		0.625139	0.492811
0.255145	0.114229		0.680705	1.23971
0.116942	0.0755548		0.463006	1.12594
0.3705	0.16646		0.378116	2.1992
0.152484	0.102766		1.24352	0.546468
0.209924	0.187591		0.278787	1.34189
0.281961	0.227462		0.711963	2.42467
0.482523	0.103364		2.82691	0.846676
0.139473	0.201845		0.708314	0.97774
0.258319	0.0751561		1.11848	2.27568
0.583915	0.0784454		1.20988	1.76222
0.238009	0.153402		0.773845	1.87868
0.146296	0.210018		1.16101	1.21956
0.372087	0.0962875		1.0612	1.68367
0.262127	0.091503		1.18687	1.68288
0.397474	0.168354		0.382083	1.23844
0.128525	0.150013		0.45174	0.733543
0.180569	0.0900078		0.525999	0.845248
0.244038	0.0694745		0.644845	0.716882
0.18406	0.160778		0.695303	0.781462
0.0756868	0.0994771		1.0428	1.64861
0.31798	0.345578		2.25426	2.5935
0.332895	0.168154		1.05406	1.94691
0.330515	0.287168		2.38247	3.35576
1.16878	0.139846		0.763849	3.13965

## Sheet: tdp1KD
Gmc500-2.5mM MTZ	tdp1-2.5mM MTZ		Gmc500-0mM MTZ	tdp1-0mM MTZ
0.189165	0.122772		1.85592	0.552405
0.146931	0.0945635		0.594535	0.57347
0.119997	0.110277		0.794076	0.359152
0.0868799	0.136308		0.851402	0.295957
0.258648	0.168113		0.59181	0.508703
0.168834	0.198972		0.676803	0.654062
0.182668	0.100906		0.793866	0.305494
0.0754566	0.228316		0.301512	0.578815
0.116224	0.226801		0.623879	0.391326
0.21589	0.219891		0.341965	1.60911
0.058898	0.138296		0.345423	0.548632
0.103858	0.15505		0.938177	1.59234
0.121883	0.103935		0.65511	1.23738
0.226475	0.206923		0.314926	0.63635
0.137499	0.0513994		0.778984	0.761797
0.288307	0.142366		1.67786	0.489629
0.295957	0.176632		0.691266	1.20731
0.246177	0.148519		1.32741	1.06708
0.140957	0.0604866		0.489734	0.724383
0.0991415	0.172562		0.848572	1.12242
0.385038	0.356009		1.05419	2.31191
0.0400339	0.119269		1.3861	0.419098
0.287888	0.183353		1.312	1.10869
0.103124	0.0697631		1.21747	0.504092
0.324463	0.129492		0.891121	0.750688
0.271853	0.103745		1.31556	0.574832
0.135822	0.180513		1.34501	0.685397
0.146197	0.180797		3.37479	2.22136
0.338716	0.300445		0.746077	2.1873
0.3711	0.213738		1.12692	2.48242
0.430941	0.136308		1.64527	2.56468
0.0527148	0.0677753		1.82186	0.861148
0.275731	0.0951315		0.830965	1.00724
0.0912815	0.155902		1.24283	1.22963
0.09998	0.203515		1.57243	1.61047
0.169882	0.110277		1.1985	1.5543
0.112766	0.217146		0.98104	1.09538
0.0811158	0.24914		0.639809	1.68541
0.0859366	0.108668		1.99604	1.43818
0.157306	0.206639		0.434714	1.36073
0.113709	0.204651		0.850982	1.20469
0.158144	0.12315		0.668419	2.33098
0.129534	0.0759159		0.526938	0.785587
0.387763	0.170763		0.788102	0.782338
0.144625	0.0993911		0.803403	1.4626
0.335258	0.190926		0.736226	1.49394
0.298368	0.119269		1.12586	0.768358
0.237806	0.195994		0.83272	1.53619
0.233958	0.189366		2.00291	1.01545
0.34105	0.584603		1.52066	0.795695
0.207417	0.196904		0.629417	1.27423
0.0306547	0.124121		0.593321	1.62204
0.166279	0.744466		0.967547	0.702006
0.165748	0.328693		0.733722	0.740888
0.0631673	0.55835		0.759201	0.767031
0.223341	0.349878		1.32319	0.640431
0.165615	0.0788916		0.886996	0.848246
0.153539	0.533915		0.934636	0.481186
0.194943	0.216789		0.538116	1.36858
0.364539	0.492325		1.19912	0.859924
0.132439	0.520528		1.47408	1.60811
0.112533	0.269167		0.59624	0.85236
0.0932911	0.131659		0.779372	1.38437
0.39599	0.179228		1.73816	1.46744
0.28412	0.0757723		0.617473	0.667237
0.135226	0.0917586		0.747258
0.161634	0.42708		1.15477	0.608426
0.0851332	0.230225		0.541985	0.612785
0.138402	0.314014		1.28087	1.63235
0.136077	0.460255		2.23012	0.806586
0.333462	0.247567		0.513801	0.202615
0.250169	0.12734		1.06334	0.355351
0.157966	0.507898		0.293462	1.07603
0.143923	0.0993777		0.941404	2.15099
0.24	0.197586		0.16891	0.771235
0.13753	0.0761895		1.42034	0.480194
0.103923	0.238312		1.20494	0.573559
0.280194	0.156958		0.567458	1.49375
0.71109	0.459086		1.40426	1.22964
0.0469734	0.30281		0.842809	0.520194
0.111768	0.191351		1.56649	1.78915
0.285327	0.0963574		0.542373	1.30508
0.221017	0.123638		0.964262	1.58877
0.170557	0.0802816		2.2153	0.682518
0.36678	0.276211		1.12136	1.37104
0.212688	0.0913885		0.372688	1.71574
0.218402	0.227302		0.495206	0.67816
0.199031	0.116623		0.615787	0.832446
0.211816	0.208303		1.10586	0.973753
0.107797	0.214247		1.3722	0.407554
0.237191	0.131042
