# Supplementary material for: Large-scale phenotypic drug screen identifies neuroprotectants in zebrafish and mouse models of retinitis pigmentosa
Source: eLife. 2021 Jun 29;10:e57245. doi: 10.7554/eLife.57245 (PMC8425951; doi:10.7554/eLife.57245)
Supplement: Figure 9—source data 1. [file elife-57245-fig9-data1.xlsx]

## Sheet: parp1_Mtz
gmc500-2.5mMTZ	parp1KO-2.5mMTZ
0.15066	0.32173
0.268925	0.353759
0.165102	0.449947
0.183056	0.255504
0.180584	0.172127
0.0849578	0.421845
0.109157	0.204672
0.102522	0.0722188
0.159898	0.267179
0.294685	0.137722
0.25058	0.424531
0.129063	0.353345
0.349719	0.166444
0.221177	0.359854
0.132186	0.394052
0.0797537	0.187624
0.0698658	0.221616
0.131145	0.132143
0.154433	0.187418
0.128022	0.167787
0.128413	0.277304
0.278032	0.0929856
0.336969	0.246619
0.0818353	0.182252
0.129045	0.358602
0.126366	0.271797
0.173163	1.16432
0.242964	0.23793
0.211609	0.315342
0.0680677	0.108861
0.282827	0.280193
0.106041	0.273363
0.253363	0.315769
0.356725	0.421642
0.557777	0.160232
0.448742	0.698562
0.0724795	0.311642
0.318279
0.0616075	0.164786
0.274161	0.197658
0.103992	0.135614
0.136923	0.247321
0.160558	0.463906
0.121639	0.529507
0.46702	0.204204
0.424635	0.205627
0.240285	0.662275
0.173636	0.645626
0.464088	0.337264
0.181043	0.193994
0.365177	0.245022
0.258538	0.326394
1.10701	0.340887
0.292097	0.310693
0.330955	0.809946
0.475789	0.147798
0.292097	0.506952
0.316163	0.658524
0.574259	0.706834
0.052105	0.324582
0.25898	0.762089
0.0587285	0.78096
0.215044	0.285632
0.165588	0.234907
0.106639	0.450641
0.415074	1.2547
0.304461	0.365646
0.268252	0.416824
0.238543	0.308035
0.133238	0.126314
0.176383	0.775289
0.163007	0.729434
0.112911	0.510562
0.407189	0.36132
0.248772	0.343276
0.44063	0.678909
0.237494	0.24923
0.520625	0.190638
0.12196	0.205923
0.117632	0.0740898
0.249428	0.147755
0.222807	0.549199
0.345947	0.22142
0.151073	0.247744
0.359979	0.117822
0.0697664	0.228638
	0.104448
	0.372996
	0.636026
0.108253	0.37415
0.280708	0.580458
0.424374	1.18796
0.25163	0.233055
0.557242	0.386321
0.0685217	0.102929
0.161659	0.747098
0.197648	0.466861
0.190162	0.0341092
0.177494	0.793679
0.124232	0.238164
0.103502	0.233055
0.424374	0.451234
0.024616	0.826285
0.0251918	0.320657
0.0741358	0.377606
0.042898	0.128774
0.258828	0.242221
0.166266	0.115701
0.139922	0.109089
0.450141	0.222086
0.335986	0.0797886
	0.443721
0.153598	0.278584

## Sheet: parp1_noMtz
gmc500-noMTZ	parp1KO-noMTZ
0.746796	0.553072
0.50103	1.74508
1.55799	1.41124
1.6868	1.87792
0.945985	1.19813
0.442613	1.10536
0.448598	0.524188
1.06477	1.64685
2.53859	0.987749
0.857905	1.31483
0.334757	1.12488
1.30689	1.97133
1.65518	1.16274
2.45701	1.96223
0.761628	1.35152
0.780363	1.1375
0.153783	0.596136
0.63829	0.517553
0.331635	0.819264
1.72947	0.962639
0.679923	1.64061
0.891992	1.94401
0.887569	1.50543
0.600429	1.16209
1.09617	1.97759
1.51356	1.0894
0.409824	1.06119
0.904575	0.84281
0.585823	1.01046
0.756465	1.79213
1.0311	0.500581
1.35773	0.810194
0.357986	0.924428
0.837453	1.54397
1.65253	1.30589
0.553523	1.37679
0.798535	1.78426
1.26587	1.19118
0.154255	0.870857
1.63583	0.462135
0.975952	0.500896
1.04749	1.3749
0.632777	0.489394
2.12428	0.686979
0.97091	0.667914
0.821224	1.09003
0.611191	2.05101
1.90495	1.16897
0.299383	1.44326
1.26951	0.610909
0.95754	0.79151
1.16265	1.14521
0.922435	1.23904
0.4674	0.610467
0.704742	0.96041
1.33464	1.24522
1.5711	0.634091
1.02731	2.18422
0.577791	2.54674
	1.01075
0.742055	2.44651
0.5014	0.854434
0.662352	1.97204
2.06234	2.12659
2.65824	2.00626
0.354579	1.41324
1.33	0.714457
0.394541	3.29365
0.536756	0.403255
0.575442	0.427385
1.56909	0.431319
1.13711	0.684157
1.17829	0.667371
1.8694	0.255198
0.73058	0.858573
0.691894	0.76507
0.669076	0.506331
0.669469	0.764808
1.70246	0.428696
1.97903	0.351979
0.730449	1.14682
0.478661	0.776479
0.627504	0.265296
0.279459	1.03024
0.987352	0.909455
1.58797	1.20098
	0.259919
	0.221364
0.54659	0.408395
1.2069	1.31228
1.65229	0.756761
1.56275	1.35647
0.745965	0.891933
1.25124	1.50978
0.886607	1.13622
2.43281	1.76098
0.626196	1.63416
0.837231	0.726819
1.8688	0.626772
2.26697	1.00263
1.24174	0.481667
0.43661	1.89615
0.409403	0.582722
0.936847	0.750427
0.520966	0.894236
0.485986	0.512905
0.171016	0.137331
1.27427	0.612808
0.389393	0.958584
0.530323	0.884304
1.17466	1.20014
0.544431

## Sheet: parp1_Drug_Mtz
parp1KD-2.5mM MTZ	parp1KD-WAR4µM	parp1KD-MIC2µM	parp1KD-CLO4µM	parp1KD-CPO2µM	parp1KD-DAH4µM	parp1KD+BMN0.5µM	parp1KD-noMTZ
0.093087	0.0258102	0.2858	0.0106142	0.37145	-0.0784896		0.250158
0.135912	0.0559259	0.129005	-0.12836	0.912289	0.0537155		1.51585
0.264525	0.552697	0.508766	0.176389	0.0390721	-0.0534853		1.16137
0.00453577	0.516088	0.00854199	0.287734	0.820146	0.262177		1.65689
-0.106948	0.223773	-0.0429862	-0.0172912	0.445358	0.564992		0.935083
0.22695	0.235929	-0.149082	0.126794	0.582536	1.07433		0.836586
-0.0634318	0.564577	0.0936396	0.285109	0.819594	0.249606		0.21949
-0.240534	-0.173534	-0.0406378	0.0584125	0.197663	0.0419732		1.41155
0.0201462	0.306245	0.119611	0.478927	0.296851	0.0110286		0.711702
-0.15295	0.0542681	0.00315432	-0.0597018	0.0414206	0.368687		1.059
0.230542	0.287043	-0.0972774	-0.0181201	-0.0885742	-0.014252		0.857307
0.135359	0.0249813	0.129419	0.12417	0.152489	0.210787		1.75608
-0.114546	0.107178	-0.156127	0.520371	0.708525	-0.123939		0.897508
0.144063	-0.0992114	-0.188315	0.393139	-0.108467	0.0336845		1.74641
0.189789	0.599804	0.0682208	0.420768	-0.0635699	-0.0280665		1.09796
-0.0862258	-0.162758	-0.174915	0.0964025	0.116295	0.0416969		0.870707
-0.0407759	0.376147	0.349623	-0.0439533	-0.110816	-0.136373		0.295884
-0.16041	0.528521	-0.0283428	-0.0913371	-0.0550049	0.0280205		0.212445
-0.086502	0.0419732	-0.0163242	0.225845	0.142267	0.0758188		0.532804
-0.11275	0.366615	-0.0326253	0.139642	0.197525	-0.112335		0.68504
0.0336845	-0.0204685	-0.0748978	0.0621424	0.072227	0.295056		1.40492
-0.212767	0.234548	-0.171047	-0.0266851	0.15843	0.155529		1.72707
-0.00734473	0.180947	0.239797	-0.052242		0.258861		1.26138
-0.0934093	0.366753	0.105382	-0.0834628		0.336914		0.896817
-0.00867909	-0.0362051	-0.341676	0.116195		-0.0570174		2.23614
-0.14519	0.455905	0.302163	0.410924		-0.346152		0.974647
1.25841	-0.174954	0.109705	0.62218		0.749068		0.934589
-0.198452	1.40902	0.263	-0.0274773		-0.0832006		0.624418
-0.0767107	0.259195	0.538259	-0.104013				0.862529
-0.401428	0.0175041	-0.17003	-0.0451566		-0.254846		1.97274
-0.131986	-0.060598	0.0427922	-0.0268059		-0.112069		0.13835
-0.142728	0.55661	-0.114307	0.854472		0.638293		0.578094
-0.0760394	0.0410019	-0.1434	-0.0740253		0.108586		0.74034
0.0904591	-0.178311	-0.090138	0.0935922		0.155358		1.62028
-0.32064	0.170128	0.369299	0.352068		1.18993		1.28213
0.525951	0.734074	0.0949349	0.135664		-0.0189734		1.38284
-0.0825292	0.738102	0.357886	0.995235		0.67947		1.96155
	0.0551006	0.0445825	0.0902353		0.0904591		1.11921
-0.313479	-0.408813	-0.408365	0.00743366		-0.072235		0.664252
-0.261784	0.603829	0.249796	-0.0805151		-0.235153		0.0837455
-0.359355	-0.0673116	0.440016	0.523489		0.168785		0.138797
-0.183682	-0.399861	-0.213893	-0.0162879		-0.245447		1.38015
0.156924	-0.36674	-0.281925	0.109929				0.122461
0.260091	0.2075	0.196759	0.667162		-0.145861		0.403091
-0.251489	-0.10446	0.727808	0.540945		0.227194		0.376013
-0.249252	0.0501772	0.553253	0.144168		-0.300947		0.975542
0.468885	0.0859834	-0.015169	1.14943		-0.151232		2.34043
0.442702	-0.0218826	1.27318	-0.0695495		1.10221		1.08766
-0.257599	-0.242129	0.207064	0.0168448	-0.248145	-0.148738		0.975105
-0.529464	0.111095		-0.302862	-0.561549	-0.194001		-0.104907
-0.432635	0.253474	-0.112069	-0.296273	0.629902	0.307617		0.12943
-0.278225	-0.307732	-0.484774	0.117398	0.0772911	-0.0731085		0.588363
-0.250723	0.184433	-0.330077		-0.352422	0.625319		0.710115
-0.308018	-0.530896	-0.598505		0.893173	0.368923		-0.10548
0.639356	0.765692	-0.442948	0.504999	0.201621	0.221102		0.348583
-0.617126	0.362334	-0.514281	0.837597	-0.443808	0.71384		0.718137
0.0643997	-0.224368	-0.353568	1.74401	1.11662	-0.0100839		-0.0748274
0.352021	0.350302	0.580915	0.745065	0.109663	-0.249577		1.93652
0.443693	-0.149311	0.113673	-0.181969	-0.216346	-0.434927		2.40691
-0.281663	-0.192569	-0.132982	0.368064	-0.396253	-0.0745409		0.4139
0.548543	0.232274	-0.59478		0.545392	-0.043888		2.27685
0.584353	-0.296846	2.02532	0.564299	0.98284	-0.405707		0.211075
-0.355573	-0.14616	-0.0837081	0.0930472	1.64202	0.69264		1.66121
-0.451829	-0.4461	0.0970579	-0.271923	-0.4249	0.721288		1.86175
-0.0424557	0.0970579	-0.496519	0.456871	0.57318	0.325952		1.70562
1.48331	1.21403	0.411894	1.02896	0.170396	0.125132		0.936145
-0.203741	0.799209	0.190449	0.161515	1.23179	-0.118372		0.0294497
-0.106626	1.41112	0.0841665	-0.151889	1.10259	1.03469		3.37606
	0.942734	0.836165	-0.527745
-0.0513951						-0.343637	0.472448
-0.327509						0.117951	0.531799
0.658567						0.0892425	0.541476
0.588893						0.835977	1.16338
0.25633						0.698242	1.12209
0.0295683						-0.154615	0.108274
0.00215042						0.183431	1.59239
0.512123						-0.326864	1.3624
-0.140745						-0.0352669	0.725982
-0.229773						0.0405355	1.36175
-0.206548						0.217945	0.535025
-0.40686						0.534702	0.346325
-0.29493						0.205043	2.30138
0.315037						0.081501	1.39046
-0.183001						-0.00784904	0.133111
-0.143003						-0.225579	2.01462
-0.340412						1.15144	1.71754
-0.172034						-0.0275254	2.4346
-0.360733						-0.317187	0.119886
0.0473093						0.00279555	0.0250524
0.446965						-0.22945
0.000399992				1.0823		-0.107358	0.0836783
0.329913				0.0771984		0.189996	1.59061
1.30021				1.31581		-0.259275	0.664466
-0.224955				0.341913		0.525989	1.66429
0.0198396				0.515429		-0.00223995	0.889821
-0.432791				0.151117		0.103118	1.91988
0.596068				0.679106		0.523829	1.29709
0.148477				-0.139997		-0.334393	2.33867
-0.542709				0.159517		-0.151517	2.12724
0.670466				0.531509		0.0803183	0.614547
-0.216795				0.418951		-0.214636	0.447751
-0.224955				0.0402392		0.541589	1.07438
0.123517				1.60573		0.246155	0.205836
0.722545				1.06334		-0.334873	2.56403
-0.0850382				0.899181		0.273754	0.374312
0.00591988				0.0414391		-0.270074	0.653906
-0.391512				-0.00847982		0.0215196	0.893661
-0.210316				-0.284954		-0.130637	0.257915
-0.412391				-0.0127997		-0.221595	-0.368232
-0.422951				-0.232155		-0.377832	0.424471
-0.242475				0.227675		-0.320473	1.00094
-0.46975				-0.347833		0.260555	0.877102
0.111518				-0.382392		-0.271994	1.40365
-0.152237						-0.174076
