# Supplementary material for: Large-scale phenotypic drug screen identifies neuroprotectants in zebrafish and mouse models of retinitis pigmentosa
Source: eLife. 2021 Jun 29;10:e57245. doi: 10.7554/eLife.57245 (PMC8425951; doi:10.7554/eLife.57245)
Supplement: Figure 10—source data 1. [file elife-57245-fig10-data1.xlsx]

## Sheet: Combined
+Mtz	War4µM	Cic0.4µM	Pyr0.04µM	Dih4µM	Cal0.4µM	Art4µM	Cor100µM	War+Cic	War+Pry	War+Dih	War+Cal	War+Art	War+Cor	Cic+Pyr	Cic+Dih	Cic+Cal	Cic+Art	Cic+Cor	Pyr+Dih	Pyr+Cal	Pyr+Art	Pyr+Cor	Dih+Art	Cal+Art	Cal+Cor	Art+Cor	-Mtz
0.412034	0.359712	0.458077		0.819307	0.604578		0.0880576	0.50705		0.966645	0.470216				0.452636	-0.0835579		0.579882							0.225768		1.88332
0.0558273	1.22281	0.131589		0.0943362	0.119869		0.02276	1.90676		1.10477	0.851118		0.556024		0.488633	-0.0852322		0.631785							0.421243		1.82556
0.131171	0.212374			0.214467	-0.0869065		-0.106998	0.900092		0.232047	0.936926		1.2923		0.339621	0.564395		1.26216							1.11775		1.29104
-0.286148	0.0884761	0.183911		0.38106	0.244604		0.23121	0.699595		0.239581	0.440497		0.836887		0.602067	0.175958											1.33457
0.0558273	0.645598	0.250464			-0.0111445		-0.114114	1.18849		0.39278	1.25462		-0.0157489		0.802564	0.490307									1.08929		1.08803
-0.030399	0.221583	0.493656		0.0955919	0.428358		-0.0496534	0.664016		1.09515	0.553931		0.585324		0.503702	0.537188		0.226606									0.968738
-0.0370961	0.667783	0.0976848			0.0683846		-0.113695	0.114846		0.770752	0.156704		0.369758		0.652296	0.111498		0.422498							0.20777		0.197305
-0.151785	0.508725	0.189353		-0.100301	-0.265219		-0.0483976	1.14956		0.547233	0.255487		0.189353		0.889209	-0.0986266		0.709222							2.12484		0.348411
-0.200759	-0.167273	0.17261			0.17261		-0.0412819	0.47482		0.46896	0.537188		-0.00235448		0.357201	-0.0818836		0.179725							0.221583		0.443009
-0.0262132	0.92688	0.201073		0.0780118	0.170098		-0.206619	0.892976		0.450543	0.700013		1.62046		0.846514	0.106475		1.01855							0.42208		1.27304
-0.0797907	0.338784	0.568581		-0.119974	-0.0458862		-0.178574	0.158797		0.456403	1.14579				0.451799	-0.00821452		0.841073							0.062106		1.44926
-0.129182	0.779542	0.070896		0.758195	-0.209549		-0.109509	0.0713146		1.91011	0.635553		0.416638		0.4631	0.0156442											0.732243
0.435893	0.591602	0.0554088		0.332086	-0.0442119		-0.042119	0.132845		0.550582	0.0537345		0.522956		0.730988	0.207351		-0.0638849							0.639738		3.78616
-0.165598	0.167168	0.195213			0.0918247		-0.16518	0.380222		0.829771	0.659411		0.126985		0.523793	0.101452		0.84484							0.188515		0.497842
0.157122	0.272649	0.0102027		-0.143833	0.264277		-0.140065	0.417475		0.59537	0.86535		0.787914		0.460589	0.4631		1.80965							0.115683		0.929392
-0.00151733	0.0340615	0.17554		0.0775932	0.447613		0.0106213	0.409104		1.89169	0.0901504		0.394035		0.133264	0.167168		0.725128							0.748568		2.24162
0.270974	0.275579	0.0160628		0.474402	-0.112858		-0.0170046	1.3262		0.672806	1.48107		0.260092		0.157541	0.0436887		0.381478							-0.0609549		1.18723
0.100196	0.170098	0.925625		0.928973	0.141635		-0.166854	0.438823			0.67448		0.70964		1.11231	0.30153		0.300693							-0.164343		0.65983
-0.0354218	0.0441073	0.390268			0.17261		-0.0936037	0.777868		0.438823	0.670294		0.600392			-0.0412819		0.359712									0.488633
0.065036	0.653551	-0.0622106		0.552256	-0.0337475		-0.000680183	0.934415		0.88	0.822237		0.715082		0.360549	0.597044		0.563976							1.81593		2.19432
0.440916	0.0918247	-0.164343		0.122799	0.090569		-0.178574	1.67613		0.419987	0.91809		0.180144		0.752335	0.423754		-0.078535							-0.119555		1.19895
-0.255173	-0.0542577	0.0114585			0.0654545		0.0357358	0.379804			0.438404		0.0930804		0.952413	0.0386658		-0.0458862							1.0106		0.419568
-0.165598	0.338365	0.264696		0.31325	-0.267312		0.0164814	0.391942			0.61881		1.88876		0.382734	0.110661		0.532165							0.0432701		0.51584
-0.0797907	1.24625	-0.158064		-0.0467233	-0.0672335			3.25457		0.916835	0.430451		0.346736		0.337946	0.453054		0.776612							1.66734		0.374362
-0.0898365	0.000156965	0.120706		0.0503859	0.0801046		-0.135461	0.882511		0.293578	0.742708		0.791262		0.340458	1.02315		0.734755							-0.17104		0.462681
0.194794	0.305716	0.49533		0.110242	0.106056		-0.00109876	1.09515		0.878744	0.422498		0.639738		0.914323	0.221164		0.476494									0.8507
-0.21499	0.090569	0.0616874		-0.00486593	-0.0936037		-0.0889993	1.19142		1.11733	0.544303		0.661086		0.637227	0.521282		-0.0174232									0.354689
-0.237175	0.0491302	1.69078		0.834794	0.180562		-0.235919	0.467286		0.344225	0.41036		0.641831		0.69206	-0.0990451		0.319529									0.288973
0.112753	0.787495	0.952413		0.285625	0.243767		-0.253499	0.84191		0.61881	0.840654		0.606252		0.267207	0.0696403		-0.0525834							0.935252		0.88
-0.159738	0.29567	0.66276			-0.248058		-0.0668149	0.371014		0.760706	1.20188		0.22535		1.00139	0.0508044		0.830608									0.306972
-0.140903	0.592021	-0.00821452		-0.0467233	1.23202		-0.187783	1.89002		0.85363	0.495749		0.209026		0.221164	0.748986		0.155029							0.0390844		0.901347
0.0545716	0.73015	0.194794		0.00350556	0.461007		0.165075	0.974179		1.28769	1.33541		0.325389		0.743545	0.630948		0.405755							0.400733		0.626344
0.0634066	0.458318	0.295412	0.532431	0.0970617	0.0351219	0.0390603	0.00433105					0.26856					0.578617		0.583987	0.285387	0.179051		0.0984939	0.198385		0.0748637	1.27535
-0.0608311	0.734003	0.299709	0.214139	0.036196	0.173681	0.225596	0.243497					0.315462					0.337302		0.339808	0.131075	0.435761		0.0838145	0.0197265		0.128211	0.954194
0.102432	0.0712833	0.184064	0.35055	0.154705	0.104222	0.0931234	0.407835					0.22846					0.310092		0.590432	0.238485	0.282523		0.200533	0.289684		0.157927	0.65452
0.00540515	0.179051	0.235621	0.231324	0.0555298	-0.0350526	0.0447888	0.330142					0.351982					0.078444		0.301857	0.262115			0.036196	0.0623325		0.192299	1.96743
0.089185	0.204472	0.29398	0.211274	0.342673	0.67815	0.148261	0.266054					0.541381					0.311166		0.449367	0.190867	0.116038		0.106371	0.0630486		0.0519495	1.07485
-0.0543865	0.221657	0.103506	0.408551	0.211991	0.576469	0.153273	0.148977					0.132507					0.130717				0.244214		0.0318996	0.438984		0.223806	2.17974
-0.0253857	0.263905	0.514887	0.202682	0.218435	0.750115	0.0748637	0.12284					0.720756					0.0827404		0.393872	0.41607			0.0132819	0.414638		0.398884	1.48086
0.167952	0.573962	0.140742	0.552122	0.235263	0.301857	0.0834565						0.475861					0.133581		0.107445	0.37239			0.0512334	0.645569		0.471923	0.898341
-0.0146447	0.760856	0.315104	0.46691	0.0594682	-0.0146447	0.0548138	0.444354					0.37239					0.289326		0.169743	0.00647925			0.00683729	0.0626905		0.1812	0.741522
0.0268872	1.1461	0.0111337	-0.0626212	0.126062	-0.00139749	0.000392682	0.258535					0.0938394					0.264621			0.0498013	0.169743		0.143606	0.695694		0.251732	0.607618
-0.0590409	0.118544	0.4397	0.147186		-0.0647694	0.197311	0.159002					0.410699					0.520257			0.159002			0.157569	0.401748		0.153631	1.3108
0.0644807	0.685311	0.661323	0.103506	0.393872	0.304005	-0.0375589	0.404255					0.454379					0.360574		0.294338	0.469775	0.208768		0.0365541	0.382773		0.251016	0.299351
0.0379862	0.132149	0.145038	0.0236649	0.0211586	-0.00927422	-0.00748406	0.118544					0.920539					0.185854			0.326919	0.136445		0.0111337	0.139668		0.0107757	0.8876
-0.0533124	0.327277	0.46691	0.18836	0.0727155	0.329784	0.0304675						0.263905					0.842846		1.21055	0.0748637	0.0483692		0.0197265	-0.0146447		0.126062	1.21269
0.00791139	1.16901	0.0276032	0.108877	0.0215167	0.489108	0.111025	0.406403					0.510232					1.07951		0.508442	0.42502	0.186212		0.0977778	0.246004		0.227028	0.282523
-0.0457936	0.231324	0.322623	0.150767		-0.00927422	0.0276032	0.221299					0.541023					0.150767		0.00146678	0.0927653	0.262831		0.108161	0.365945		0.0970617	0.99143
0.0190104	0.237053	0.428601	0.496627	0.0702092	0.117828	0.181558	0.269992					0.561073					0.490541			0.0372701	0.76193		0.427527	1.34051		0.242423	0.56895
-0.0139287	0.0619745	0.241707	0.35413		-0.0422133	0.0218747	-0.00999029					0.498059					0.653088		0.322623	0.26677	0.142174		0.125346	0.42323		-0.0268179	0.757992
-0.0629793	0.340883	0.110309	0.206978	0.123556	0.387069	0.0440728	0.0297514					0.708941					0.3996		0.668841	0.488392	0.294338		0.0616164	0.046579		0.0734315	0.647001
-0.0350526	0.57432	0.39423	0.0540977		0.0494433	0.10279	0.0426406					0.799166					0.078444			0.302215	0.385995		0.067345	0.293622		0.301499	1.48015
	0.110309	0.530282	0.299709		-0.0576088	-0.0475838	0.343747					0.813487					0.15936		0.210558	0.147186	0.148261		-0.0157188	0.20841		0.0401344	1.05838
-0.0762265	0.26677	0.377402	0.626235	0.260325	0.00791139	0.0172203	-0.00820012					0.831031					0.874353		0.283597	0.615852			0.0959876	0.376328		0.41965	0.414638
-0.0522383	0.563579	0.586852	0.024739	0.325487	0.0870368	0.025455	0.0648387					0.275362					0.398526		0.44328	0.0931234			0.0279613	0.27035		0.351982	0.648075
-0.0117805	0.131433	0.137162	0.244214		0.12105	0.0598263	0.0490852					0.280017					0.416786		0.182274	0.307585	0.206262		0.0598263	0.0383442		0.356278	1.1461
-0.0425713	0.336944	0.225954	0.067703		0.218435	0.384205	0.0830984					0.292906					0.722546		0.775893	0.263905	0.0526656		0.00254088	0.654162		0.0168622	0.569666
0.0856047	0.653446	0.600457	0.241349	0.135013	-0.0450776	0.046937	0.0179363					0.477293					0.536369		0.625519	0.625519	0.215929		0.0415665	0.0827404		0.145396	2.25672
0.0526656	0.724695	0.341599	0.333364		0.025455	0.167594	0.136087					0.316536					0.100642		0.358426	-0.0257438	-0.0128546		0.0970617	0.222373		-0.000323385	0.585778
-0.0354107	0.0762958	0.123198	0.187286	0.846426	0.0258131	-0.00354569	-0.0264598					0.238843					0.13752		0.0634066	0.0859627	0.508442		0.046937	0.00862745		0.107445	0.731139
-0.0375589	0.3305	0.236695	0.307585		-0.0239536	0.24851						0.359142					0.317252		0.201966	0.0809502	0.448293		0.0225908	0.0283193		0.146112	1.43253
0.00755335	0.0705673	0.922329	0.635544	0.157569	0.130001	0.433971	0.229534					0.534937					0.0630486		0.222732	0.504504	0.116396		0.0161462	0.524554		0.169026	0.955984
-0.0314723	0.301499	0.124988	0.158644	0.255313	-0.0311143	0.0651968	0.148977					0.456527					0.769449		0.606543	0.0451469	0.174397		0.215929	1.08094		0.0741476	0.558925
-0.017867	0.435403	0.327277	0.278585	0.276795	0.165088	0.0709253	0.0218747					0.159718					0.304363		0.24493	-0.0665596	0.126062		0.161508	0.167952		0.319401	1.36915
-0.0428956	0.0152271	0.13599	0.236876	0.12289	-0.0567487	0.130268	-0.0504244	0.411395	0.392121		0.43353	0.418924	0.233564	0.415611	0.304335	0.173935	0.150445	0.384442	0.713904	-0.0415404	0.165503	0.241845	0.261872	0.0357055		0.0341998	0.491954
-0.0291931	0.289729	0.159781	0.325717	0.100002	0.0569369	0.0878052	-0.0356679	1.17557	0.767359	0.0808786	0.13599	0.196371	0.146982	0.0378136	0.318037	0.214591	0.260216	0.599616	0.133279	0.0638634	0.103465	0.105423	0.0456436	0.133129	0.388959	0.105423	1.35943
-0.00826291	0.427657	0.00935459	0.252235	0.263378	-0.0608142	0.115963	0.0597979	0.26127	0.0912684	0.174086	0.0923225	0.489394	0.49617	0.160383	0.111747	0.027725	0.087504	0.559412	0.126052	0.26398	0.260818		0.116565	-0.00585368		0.232961	0.261721
-0.00133637	0.00197632	0.117469	0.139754	0.0165823	0.00724651	0.037663	-0.0141354	0.180711	0.3215	0.315929	0.0599484	0.42058	0.200286	0.372546		0.176043	0.416063	0.243652	0.0400723	0.0709405	0.286266	0.179506	0.191101	0.180109		0.128913	0.418171
0.0628094	-0.0213631	0.130569	0.102863	-0.0444014	0.00965574	0.0477517		0.298011	0.469819	0.171225	0.0534736	0.469066	0.716313	0.0692842		0.051215	0.176947	0.105573	0.316833	-0.0147377	0.164901		0.129816	0.0229065		0.0114627	0.862373
-0.0666867	0.266088	0.29274	0.120781	0.13072	0.0186904	0.0358561	0.145024	0.162943	0.100755		0.539536	0.246664	0.0266709	-0.0400346		0.0477517	0.0302848	0.101357	0.20917	0.0923225	0.321199		0.110693	0.114156	0.220463		1.18852
-0.0383783	0.192757	0.192607	0.123642	0.125901	-0.0172975	0.185981	-0.0320541	0.177097	0.132075		0.473583	0.0402229	0.00574074	0.0900638		0.0801257	0.129816		0.0738015	-0.0076606	0.215494	0.0290802		0.0706394	0.276478	0.202244	1.33549
-0.0343127	0.0649175	0.175441	0.0101075	-0.0264827	-0.0653316	0.0771142	0.14397	0.208718	0.249976	0.282501	0.118824	0.0644657	0.694479	0.15963	0.277231	0.0826855	0.262023	0.112951	0.255698	0.102712	0.398144	-0.0106721	0.0789211	-0.0123285	0.584709	0.060099	0.227239
-0.0096181	0.542849	0.0719946	0.0829867		0.0302848	0.164298	0.14909	0.419225	0.808617		0.0468482	0.246814	0.689059	0.2953	0.379924	0.09428	0.239888	0.356284	0.521617	-0.00208925	0.249374	-0.0391312	0.0829867	0.143519		0.10723	1.23234
-0.0436485	0.0742532	0.444522	0.465452	0.111446	0.00197632	0.0971409	0.0343504	0.348755	1.47552	0.257505	0.232359	0.3343	0.223475	0.219108	0.399349	0.23266	0.0576898	0.577481	0.163395	0.040524	0.595701	0.184325	0.0873534	-0.0135331	0.889025	0.147735	0.923206
0.0176363	0.441059	0.294246	0.380075		-0.00449848	0.0518173	0.0489563	0.332794	0.324663		0.096388	0.557756	0.755162	0.270907	0.251181	0.0829867	0.243502	0.586968	0.00980632	0.190047	0.473131	0.0338986	0.345894	0.111897	0.548269	0.0459448	0.679271
-0.0535866	0.111145	0.056184	-0.0293437	0.139453	-0.00871464	0.133731	0.012065	0.329632	0.388357	0.0683807	0.122287	0.236726	0.252536	0.173634	0.538632	-0.0561464	0.209772	0.223776	0.121685	0.179958	0.266691	0.30313	0.171526	0.124395	0.0301342	0.127557	1.20207
-0.0340116	0.0435355	-0.0172975	0.480209	0.163395	-0.0460577	0.117619	0.172279	0.369384	0.138098	0.875473	0.135237	0.460031	0.46244	0.0695853		0.555648	0.316531		0.0320917	0.103616	0.358994	0.370739	0.0900638	0.0870523	0.867041	0.172731	1.38774
-0.00600425	0.302829	0.00197632	-0.010371	0.0724463	-0.0204596	0.020949		0.262324	0.174387		0.194414	0.138098	0.0247134	0.186734	0.607446	-0.0210619	0.318338	0.277984	0.0929248	0.217753	0.266841		0.155866	0.099249		-0.00464906	0.944437
-0.0486175	0.060099	0.180561	0.254946	0.0188409	-0.0328069	0.000470553	0.0473	0.317284	0.429163	0.125751	0.212633	0.298011	0.0977432	0.136592	1.16609	0.472077	0.41004	0.212935	0.362608	0.053323	0.340021	0.568447	0.142615	0.123341	0.0763613	-0.00871464	2.05509
-0.0422933	0.0793728	0.109789	0.25344		0.0149259	0.184174	0.0325434	0.161588	0.265185	0.120932	-0.0057031	0.285061	0.0500104	0.352218	0.828794	0.332191	0.555196	0.372094	0.180259	0.236876	0.336106	0.106176	0.150144	-0.0313012	0.318037	0.0271227	2.48604
-0.0627717	0.184325	0.16746	0.622052		0.00754767	0.0966892	-0.00510079	0.608651	0.615427	0.465603	0.0902144	0.458827	0.298161	0.22468	0.163696	0.182669	0.2822	0.694931	0.17258	0.102411	0.279038	0.221668	0.163094	0.0445896	0.504753	0.0463965	0.889175
-0.0328069	0.260065	0.362759	0.463043	-0.00254099	0.0867511	0.108585		0.254946	0.296354		0.435035	0.408986	0.678669	0.255698	1.40129	0.0596473	0.139905	0.841894	0.171526	0.132376	0.406878	0.14382	0.120179	0.13087	0.353875	0.210977	0.688607
0.00935459	0.114909	0.250428	0.116866	0.0174857	0.128461	0.119426	-0.0359691	0.462139	0.697943	0.275876	0.356284	0.296354	0.147132	0.369535	0.315779	0.427657	0.229649	0.329481	0.0894615	-0.00525137	0.391067		0.101959	0.0245629		0.0254663	0.735135
-0.06232	0.205556	0.0314894	0.444221	0.204201	-0.0206102	0.249525	0.0390182	0.129816	0.609554	0.0432344	0.137646	0.276478	0.229347	0.937059	0.607747	0.0402229	0.0325434	0.855597	0.477197	0.574319	0.243803	0.182066	0.0387171	0.0226054	0.17002	0.00348209	0.565435
0.018088	-0.0346139	0.273316	-0.0123285		0.0319411	0.071844	0.0543771	0.180259	0.494513		0.47283	0.65819	0.50144	0.531104	0.580192	0.325867	0.19336	0.166406	0.00272921	0.0272732	0.127859	0.083589	0.10738	0.414406	0.0778671	0.195468	2.33848
-0.0540383	0.213085	0.248922	0.463193		0.231305	0.191703	-0.0561464	0.624009	0.608048		0.623558	0.401607	0.113102	0.415611	0.861319	0.62416	0.240189	0.338064	0.358392	0.032694	0.278436	0.0126673	0.147735	0.29515	0.306593	-0.0017881	0.834968
-0.0617177	0.101809	0.111295	0.185379	0.111596	0.1387	0.140959	0.0465471	0.346045	0.257204	0.531104	0.482015	0.262324		0.269401	0.771575	-0.029946	0.337462	0.14382	0.372697	0.0638634	0.0524196	0.278586	0.140356	0.215344	0.809972	0.0257675	1.10992
-0.0163941	0.0674773	0.119125	0.169418	-0.000131755	-0.0252781	0.0179375	0.101809	0.893843	0.37345	0.459128	-0.0204596	0.265335	0.0480529	0.201792	0.398897	0.266088	0.14382	0.354627	0.456568	-0.0591579	0.17002	0.191251	0.0310377	0.204803	0.092473	0.00062113	0.90077
0.0843419	0.0292307	0.11265	0.0905155		0.0569369	0.113855	0.0132696	0.814489	0.433379	0.539385	0.881345	1.5088	0.239135	0.477498	0.157071	0.147283	0.146681	0.428862	-0.0278379	0.0604002	0.128762	0.290482	0.0265204	0.0960869	0.117318	0.245007	0.525683
0.134785	0.147132	0.482015	0.00634305	0.0887086	-0.0343127	0.141411	0.0343504	1.06836	0.402511		0.241695	0.426001	0.248772	0.090365	0.475089	0.314574	0.215796	0.465753	0.137797	0.373901	0.156167	0.0558829	0.0832878	0.153758	0.116264	0.186734	1.09983
0.114006	0.0406746	0.276478	0.25615		-0.0154906	0.0453425	-0.0293437	0.0704888	0.560165	0.308551	0.171676	0.417569	0.131322	0.225432	0.501741	0.199081	0.163395	0.31623	0.141109	0.0852453	0.298161		0.0692842	0.170622	0.400855	0.0485046	1.31727
0.0515161	0.124696	0.198178	0.269551		-0.00193868	0.00167517	0.275123	0.622504	0.312466	0.497374	0.427808	0.52508	0.18041	0.248772	0.55625	0.469969	0.231606	0.476595		-0.0175987	0.213687	0.152101	0.168966	0.338967	0.395584	0.00197632	0.879388
0.041578	0.338967	0.338967	0.364415		0.113855	0.0581415	0.017034	0.975908	0.291385		0.264432	0.497977	0.175591	0.155565	0.394831	0.207062	0.275725	0.0680796		0.10738	0.280544	0.105874	0.161738	0.126503	0.592087	0.0759096	1.58153
0.246061	0.296204	0.121685	0.0498598		-0.0175987	0.0597979	0.052269	0.304184	0.19863	0.347701	0.119878	0.625515	0.372094	0.313972	0.390164	0.30313	0.163846	0.0382654	0.419827	0.0447402	0.263227	0.0263698	0.080728	0.157522	0.44678	0.118673	0.262173
-0.0355173	0.0983455	0.446479	0.377967		-0.0157918	0.0129684	0.051215	0.228896	0.247417	0.456417	0.288675	0.463946	0.299667	0.0143236	0.561219	0.156318	0.139604	0.144723	0.289126	0.0224548	0.330535	0.0947317	0.148789	0.204201	0.0731992	-0.0127802	0.62416
0.00423498	0.291837	0.205556	0.0652186	0.0631105	0.120932	0.0119144	0.0492575	0.459278	0.322705		0.293794	0.0858477	0.100604	0.321651	0.550076	0.188541	0.300871	0.17002	0.0349527	0.02381	0.0709405	0.20646	0.0617554	0.000169399	0.342882	0.102411	0.592388
0.0617082	0.093379	0.206049	0.245847	0.0681544	0.0133611	0.142987	0.096462	0.262944	0.586098		0.29952	0.431108	0.127712	0.0824484	0.480436		0.14579	0.321241	0.444701	0.0359231	0.0366238	0.0654919	0.318158	0.111316	0.119444	0.270371	1.39721
-0.0354063	0.516311	0.0866524	0.040968	0.149153	0.0341013	0.0982838	0.0464333	0.274155	0.377716	0.493468	0.453529	0.213616	0.482818	0.0223299	0.366645	0.36174	0.115661	0.0945001	0.226228	0.304985	0.23842	0.314374	0.106832	0.0439109	0.529343	0.395513	0.655606
-0.0292403	0.172976	0.274435	0.150555	0.117482	0.143548	0.0940797	0.0279353	0.636407	0.424101		0.498794	0.0590456	0.34072	-0.0152267	0.338618	0.211374	0.275696	0.181385	0.0485354	-0.0460567	0.178722	0.139204	0.274996	0.0200877	0.106272	0.0911368	1.38067
-0.0177491	-0.0125641	0.406163	-0.0331641	0.271632	0.000468581	0.0776837	0.00677472	0.204087	0.465021	0.444841	0.0774034	0.714323	0.139204	0.303303	0.47511	0.0261135	0.123929	0.316897	0.0916974	0.131916	0.416814	0.434191	0.161065	0.362441	0.245147	0.286767	0.743612
-0.0459166	0.0192469	0.0593259	0.261262	0.0765626	0.263364	0.155179	0.034802	0.117342	0.872817		0.417935	0.246128	0.264766	0.188391	0.968671	0.0952008	0.112998	0.242344	0.122667	0.116081	0.31003	0.0981436	0.170594	0.104169	0.83428	0.0297571	0.162186
-0.0651152	0.338898	0.544478	0.16625		0.00144954	0.0429299	0.0455925	0.378697	0.35095		0.0786647	0.0355027		0.0249924	1.02052	0.229872	0.399437	0.067734	0.131496	0.15658	0.472027	0.307507	0.137802	0.0607272	0.11468	0.12519	0.616368
-0.029941	0.350529	0.219922	0.0380251	0.0199475	0.0318591	0.342121	-0.0163478		0.344363	0.0886144	0.398456	0.0460129	0.193857	0.23856	0.397615	0.070817	0.0639504	0.409947	0.247529	0.0244319	0.257619	0.246828	0.140325	0.220623	0.0757218	0.26897	2.07323
-0.0711411	0.0251326	0.293774	0.529624		0.0171448	0.12547	-0.029941	0.282703	0.1151	0.50524	0.352631	0.472868	0.327687	0.22791		0.0935191	0.247109	0.267148	0.202545	0.241083	0.398456	0.0605871	0.040968	0.0601667	0.209692	0.356695	1.94584
0.00411213	0.23856	0.150414	0.158963		-0.0436744	0.10431	0.00873663	0.249771	0.801208	0.270652	0.352631	0.561575	0.342682	0.147752	0.132057	0.142287	0.0696959	0.209552	0.415132	0.240242	0.133738	0.159663	0.185729	0.0692755	0.480576	0.274856	2.4331
-0.00443619	0.0604469	0.161345	0.191755	0.0562429	-0.0596499	0.0932389	0.000188308	0.459415	0.0353625	0.588761	0.298399	0.262524	0.283964	0.239121	0.498373	0.140465	0.264766	0.480015	0.404061	0.342682	0.268549	0.241643	0.146491	0.0247122	1.29687	0.242484	0.660931
0.0760021	0.142987	0.729318	0.285926		0.0439109	0.0858116	0.00383185	0.368747	0.15588		0.199462	0.501877	0.499214	0.0154632	0.752861	0.24823	0.0457326	0.194698	0.200163	0.101086	0.363982	0.138503	0.345344	0.0308782	0.264205	0.0579245	1.04294
-0.0495601	0.194277	0.0929586	0.119725	0.103609	0.00957745	0.0723585	0.0570837	0.318858	0.161485		0.0331204	0.237579	0.192596	0.222445	0.47483	0.0219094	0.49515	0.0659123	0.303724	0.260842	0.407985	0.109355	0.129254	0.12533	0.12547	0.116782	1.2198
0.00453254	0.212074	0.110335	0.131356	0.267989	0.113138	0.31998	0.0335408	0.364683	0.0511979		0.206189	0.327967	0.321661	0.0654919		0.110335	0.167091	0.28929	-0.0048566	-0.00920083	0.121126	0.395373	0.137242	0.103889	0.425502	0.0987042	1.12899
-0.0597901	0.0904361	0.0388659	0.235337	0.0695558	0.148733	0.0441911	0.0422292	0.0859518	0.222024		0.288449	0.173677	0.603896	0.0842701		0.285786	0.0605871	0.415973	0.0133611	0.0799259	0.18671	0.439516	0.208291	0.0576442	0.188391	0.132337	2.4963
-0.0613316	0.0846905	0.322922	0.018406	0.0895953	-0.0312022	0.244866	0.0525993	0.357536	0.420177	0.254536	0.185729	0.543217	0.226929	0.0219094		0.0334006	0.00088899	0.214457	0.428165	0.139484	0.430407	0.789156	0.11496	0.232114	0.61805	0.100246	1.1224
0.0161639	-0.0209723	0.499634	0.232815	0.0715177	0.836662	0.0689953	0.106552	0.161345	0.593386		0.200723	0.143127	0.0895953	0.155179	0.230993	0.205488	0.102067	0.132197	0.118183	0.260702	0.281862	-0.0232145	0.00425226	-0.0233546	0.347306	0.0918375	0.245707
-0.0384893	0.0867926	0.475391	0.538873		0.110476	0.0552619	0.0918375	0.708157	1.19653	0.648739	0.370008	0.305826	0.251873	0.440076	0.702131	0.00509308	0.357956	0.249911		-0.00527701	0.202825	0.467823	0.17662	0.14621	0.156721	0.0576442	0.939102
0.000608717	0.294194	0.602354	0.168492		0.185589	0.0730592	0.103189	0.961664	0.284105	0.284805	0.366785	0.425502	0.140325	0.376454	0.888232	0.259721	0.0977232	0.239962	0.292373	0.0119598	0.38192	0.155039	0.144248	0.20745	0.10515	0.328808	1.28272
0.0356428	0.0556823	0.321241	0.208711	0.181385	0.00635431	0.118323	0.236598	0.292233	0.353612		0.550083	0.42368	0.0898756	0.311711	0.51533	-0.0236349	0.277939	0.120005	0.0510578	0.274856	0.299239	0.163307	0.153638	0.099545	0.769537	0.0511979	0.85502
0.0256931	0.0552619	0.293073	0.475811		0.190914	0.058485	0.0199475	0.235898	0.209412		0.157561	0.422699	0.120285	0.362441	0.0188264	0.339318	0.152657	0.484219	0.302462	0.136821	0.181525	0.194417	0.220623	0.185589	0.4646	0.0911368	0.451427
-0.0519424	0.260281	0.104169	0.322922		0.308068	0.00705499	0.182926	0.347306	0.210673		0.535229	0.436153	0.0199475	0.18699	0.432089	-0.0201315	0.226228	0.251593	0.0754415	0.284665	0.153918	0.345484	0.192596	0.068715	0.293354	0.0811871	0.493749
-0.0188702	0.17704	0.164989	0.271352	0.0663327	0.393831	0.0633898	0.120706	0.545459	0.289009	0.211514	0.389067	0.465301		0.68027	0.795462	0.0673136	0.277378		0.099545	0.169893	0.739127	0.0698361	0.111457	0.14607	0.144248	0.251173	0.208571
0.0691354	0.365524	0.827413	0.0312986	0.0628293	0.0203679	0.0339612	-0.00345524	0.450026	0.376034	0.200583	0.549383	0.580773	0.146911	0.430968		-0.0134049	0.0464333	0.221744	0.0596061	0.141446	1.09339	0.401399	0.149153	0.136121	0.572225	0.199602	1.3099
0.0758619	0.333573	0.158262	0.2174		0.239121	0.170314	0.0441911	0.183206	0.792659		0.0916974	0.305826	0.614967	0.424942		-0.00667837	0.0881939		-0.0326036	0.178722	0.482678	0.0628293	0.0888946	0.0412483	0.27976	0.109915	1.64679
-0.0198512	0.0265339	0.116782	0.588481		-0.0153668	0.130235	0.10501	0.610202	0.909954		0.421999	0.288869		0.0884742	0.251173	0.128413	0.138503	0.332312	-0.00065251	0.157842	0.0541408	0.268269	0.202685	0.0942198	0.479034	0.111597	0.633605
0.151956	0.456472	0.288028	0.194838	0.182366	0.0112591	0.0575041	0.0660524		0.414151		0.142427	0.694003	0.0468537	0.620152	0.415272	0.0778239	0.130515	0.527101	0.0118196	0.462638	0.274715	0.0668932	0.101787	0.0866524	0.593105	0.17648	0.935599
-0.0250362	0.507902	0.404902	-0.00625796	0.0758619	0.130235	0.139063		0.528783	0.78271	0.277939	0.434331	0.506781	0.231834	0.200723	0.920464	0.226789		0.17634	0.226368	0.265186	0.344644	-0.071001	0.360899	0.195959	0.457453	0.0845504	0.898322
0.0170047	0.950453	0.0289163	0.139904		0.0256931	0.0973028	0.158683	1.2027	0.557931	0.866371	0.417795	0.254956	0.370989	0.251453	0.230713	-0.0209723	0.337917	0.318858	0.193436	0.219642	0.261122	0.286767	0.0839899	0.031719	0.171435	0.122667	0.714463
-0.0327437	0.418495	0.153217	0.0806266		0.0216292	0.067734	0.0464333	0.371129	0.723853		0.14565	0.508323	0.326426	0.0495163	0.370008	0.251173	0.26953	0.0252727	-0.00681851	-0.00625796	0.415693		0.219502	0.102908	0.64972	0.0987042	0.499354
-0.0417125	0.13514	0.0786647	0.40266		-0.0244757	0.0118196	0.0818878	0.027655	0.335254	0.182366	-0.0759057	0.215438	0.407144	0.621413	0.395653	0.159243	0.153217	0.129814	0.113138	0.407425	0.611743		0.00144954	0.0364836	0.142987	0.0587653	0.108514
0.183767	0.164148	0.259721	0.188672		0.0702565	0.0654919	-0.0386295	0.356695	0.206189		0.137942	0.124209	0.061568	0.395933	0.372671	0.0839899	0.0838497	0.147051	0.121546	0.158262	0.329509	0.104029	0.0724987	0.241083	0.288589	0.199883	1.13305
-0.0239151	0.492067	0.809476	0.292233		0.0106985	0.272473	0.0385857	0.306667	0.160224		0.550224	0.123929	0.429146	0.0530197	0.833579	0.112578	0.131076	0.0768429	0.0181258	0.215998	0.0377449	0.156861	0.0388659	-0.00765933	0.0366238	-0.00121306	0.564938
-0.035955	0.349403	0.188347	0.0109278	0.0401606	0.038506	0.19754	-0.000103418	0.66122	0.950974	0.499428	0.200849	0.366502	0.0179143	0.365399	1.18851	0.189634	0.178235	0.731268	0.00780231	0.000815853	0.46946	0.273472	0.0190174	0.0763799	0.408053	0.151944	1.19807
-0.0504795	0.0861242	0.232288	0.334511	0.0105601	0.0771153	0.102855	-0.037242	0.24479	0.234311	0.342785	0.0853888	0.648534	0.0938461	0.531235	0.280642	0.140913	0.297556	0.269978	0.1422	0.43655	0.410259	0.277516	0.104877	0.170329	0.143303	0.269611	0.873388
-0.0295201	0.638974	0.0451247	0.260969	0.0230622	-0.0405513	0.117012	-0.0569144	0.273839	0.675009	0.165181	-0.00396436	0.206733	0.287628	0.0804247	0.947665	0.202136	0.125285	0.420003	0.423313	-0.028417	0.185773	0.0723351	0.0885143	0.245158	0.476447	0.0616716	1.91529
-0.0499279	0.517078	0.0546851	0.139258	0.177316		0.0855726	0.29774	0.0313356	0.562858	0.126756	0.311346	0.587311	0.195701	0.403273		-0.00249352	0.359331	0.444824	0.335063	-0.0486409	0.238355	0.254902	0.0454924	0.0732544		0.0844695	0.162975
0.00155127	0.115173	0.187244	0.325318	0.0907205	0.13172	0.210593	-0.059856	0.497774	0.946562	0.0250846	0.562674	0.541715	0.222912	0.196621	0.818415	0.169226	0.338372	0.506415	0.30105	0.0796893	0.30822	0.449788	0.147715	0.0524789	0.350874	0.326605	0.976162
0.0109278	0.515975	-0.0223498	0.165365	0.163343	-0.0923982	0.0949492	-0.095156	0.0664518	0.293879	0.379004	0.110209	0.164078	-0.0140763	0.087595		-0.0677617	0.161688	0.862173	0.0659002	-0.0199597	0.160585	0.1422	0.0594653	0.215006	0.386174	0.00890544	0.156173
0.00467679	0.0462278	0.0758283	0.340394	0.0260039	0.792308	0.125653	0.0438377	0.356574	0.399228	0.221257	0.448317	0.307668	0.55293	-0.0162826	0.77668	0.0616716	0.109841	0.593378	0.113151	0.172719	0.234311		0.0133179	0.0442054		0.110577	0.484352
-0.0354034	0.0995455	0.175293	0.117747	0.162608	0.133375	0.100097	0.0454924	0.281193	0.176764	0.110944	-0.0776899	0.246997	0.180258	0.471299	0.15893	-0.0197758	0.098994	0.192392	0.275678	-0.0355873	0.221625	0.0693935	0.0660841	0.149554	0.556055	0.062407	0.244423
-0.0212466	0.369811	0.48233	0.020856	0.0423669	0.164814	0.178235	0.20232	0.504576	0.544656	0.341865	0.0337257	0.310242	0.606431	0.077483	0.508253	0.077483	0.292225	0.196621	0.0857565	0.187979	0.0488018	0.00798616	0.0806086	0.234494		0.0583622	0.909791
-0.0752998	0.28248	0.090169	0.297189	-0.0103993	0.0175466	0.0947653	0.105429	0.687879	0.647982	0.190369	0.207652	0.573522	0.160217	0.248284	0.245158	0.0122148	0.329915	0.676848	0.0239815	-0.0629815	0.245342	1.08758	0.130801	0.190002		0.0504565	1.55861
-0.0747482	0.403824	0.287444	0.260969	0.0408961	0.00375752	0.12363	0.102855	0.803339	0.663978	0.658646	0.0600169	0.591907	0.319435	0.386726	0.378268	-0.02713	0.117379	0.872468	0.209674	-0.0469862	0.020856	0.227692	0.0916398	0.0728867	0.199378	0.0675549	1.25489
-0.0651878	0.0475148	0.505863	0.227324	0.408421	0.0938461	0.121792	-0.00837686	0.0703127	0.598893	0.35308	0.289651	0.164078	0.41173	0.294247	0.869711	-0.0166503	0.381026	1.04787	0.390035	0.0861242	0.0818955	0.605512	0.0109278	0.00964085		0.105613	1.87944
-0.0484571	0.100465	0.0780346	-0.0343003	0.0234299	0.212064	0.223279	0.267404	0.503473	0.414304	0.466702	0.227876	0.328444	0.484168	-0.0387128	0.711964	0.12694	0.386174	0.674825	0.0383221	-0.010767	1.24863	0.00982471	0.0778507	0.219786		0.287996	0.969543
0.0114794	0.108003	0.214271	0.0532143	0.187979	-0.0815508	0.219602	-0.0151795	0.395367	0.43894	0.335982	0.221992	0.0997294	0.670413	-0.0618784	0.164998	-0.0830216	0.208939	0.557894	0.276046	0.00872158	0.19993	0.138155	0.112231	0.166285		0.253064	0.759214
-0.0616946	0.0232461	-0.00341279	0.0879627	0.0123987	0.027107	0.116276	-0.0479055	0.165549	0.512298	0.191656	0.254351	0.925602	0.189818	0.0910882	1.21922	0.191656	0.203975	0.367237	0.11168	0.169778	0.214822	-0.0541565	-0.0168341	0.183199	0.516527	0.0493534	1.6145
-0.0627977	0.360435	-0.0767706	0.122527	0.165917	-0.00322894	0.0570752	0.0975231	0.112967	0.747264	0.405479	0.0833664	0.0237976	0.240194	0.123263	0.957777	0.0199367	0.212432	0.293879	0.181728	0.0728867	0.132639	0.0717836	-0.0194081	0.120321	0.277884	0.268691	1.58876
-0.0618784	0.249203	0.722627	0.080057	0.0857565	0.153231	0.208387	0.345542	0.832204	0.710493		0.117012	0.703874	0.217948	0.439124	0.354	0.369995	0.265566	0.791021	0.117379	0.14459	0.212984	0.10929	0.0953169	0.0905367	0.29057	0.140729	1.63712
0.0966039	0.0749091	0.206549	0.278803	0.125101	-0.0113185	0.107084	0.1012	1.50346	0.816209	0.30583	0.232288	0.741564	0.345542	0.0750929	0.535831	0.248467	0.679605	0.0401606	0.275126	0.138155	0.233024	0.0252685	0.158195	0.135029	0.686592	0.402169	1.09162
0.0379544	0.144406	0.0969716	0.241297	0.414855	0.120505	0.19754	0.18467	2.75955	0.537486	0.187428	0.221809	0.264095	0.163711	0.733107	0.464496	0.321825	0.463025	0.63401	0.00964085	0.0660841	0.306381		0.0499049	0.143854	0.162608	0.568006	0.754986
0.228611	0.356941	0.478837	0.167939	0.171616	0.457693	0.163894	0.0147888	0.0609362	0.231185	0.995099	0.202504	0.704426	0.234127	0.394815	0.89876	0.090169	0.449604	1.00926	0.939575	0.207836	0.307668	0.119953	0.0980747	-0.0368742		0.274942	0.696152
-0.0223498	0.052295	0.117931	0.358596		0.0414476	0.117931	0.354919	0.832388	0.505679	0.212064	0.278436	0.425519	0.433976	0.090169	0.847464	-0.000103418	0.471666	0.909607	0.00669919	0.0835502	0.0532143	0.540244	0.0517435	0.377349	0.738439	0.0671872	0.647063
0.0752768	0.0789539	-0.00635446	0.00357367	0.307301	0.206733	0.273655	0.0592815	0.430115	0.362825	0.880926	0.0697612	0.163527	0.639157	0.0533981	0.682179	-0.0885373	0.696888	0.382497	0.294615	0.565616	0.192576	0.136868	0.151392	0.315023	0.670229	0.109474	1.12361
-0.0534211	0.306565	0.0155242	0.505128	0.0237976	0.13172	0.0920075	-0.0401836	0.590436	0.601835	0.554033	0.151944	0.122895	0.0886981	0.442985	0.618382	-0.0175696	0.684018	1.0999	0.26336	0.524432	0.440227	0.405295	0.140729	0.307852	0.142567	0.364663	1.20488
-0.0295201	0.355103	-0.0602237	-0.0137086	-0.0113185	-0.0304394	0.0140534	0.0673711	1.58178	0.784035	0.12363	0.328812	0.724282	0.464864	-0.0618784	1.29166	0.327892	0.18228	0.491339	0.116092	0.0668195	0.138706	0.15746	0.0366674	0.016995	0.347565	0.218499	1.63344
0.0351966	-0.00230967	0.325502	0.117012	0.15893	0.231553	0.0960523	0.200665	1.07544	0.310059	0.341865	0.270162	0.245158	0.255086	0.0883304	0.851693	0.0445731	0.32587	0.134846	0.340211	0.0164435	0.200114	0.713618	-0.0127894	0.000999707		0.14698	1.82024
0.0515596	-0.0137086	0.112967	0.0734382	0.723179	0.0695773	0.0723351	0.128962	1.13391	0.559732	0.591723	0.286893	0.558078	0.378636	0.0239815	1.31023	0.167939	0.254902	0.757192	0.131536	0.188715	0.329731	0.442801	0.0368513	0.147164		0.162608	0.719869
0.152863	0.0842856	0.110761	0.0160757	0.16463	0.0133179	0.0732544	0.0563398	0.572786	0.776313	0.525903	0.400699	0.150841	0.82963	0.614521	0.448501	0.128227	0.54576	0.324767	0.474976	0.385439	0.122895	0.313184	0.0877789	0.0866757	0.42129	0.351977	0.497774
-0.0576498	0.0465955	0.145877	0.0302325	0.546311	0.0923752	0.101936	0.0850211	0.313	0.322928	0.282664	0.492993	0.271817	0.875778	0.271081	0.298476	0.00173512	0.659933	0.0361159	0.112967	-0.0249237	0.260602	0.530867	0.0885143	0.0304164		0.287628	1.34424
0.114805	0.248835	0.155069	0.115541	0.169778	0.0971554	0.0129502	0.0513757	1.08004	0.355838		0.239275	0.613418	0.206916	0.112048	0.190553	0.133926	0.341681	0.212248		0.56488	0.0660841	0.54576	0.00173512	0.0530304	0.0454924	0.071232	0.654601
-0.0387128	0.769878	0.271633	0.0938461	0.235598	0.306565	0.133742	0.0146049	0.931853	0.614153	0.701668	0.407869	0.569109	0.172903	0.364663	0.15415	0.0480664	0.0811601	0.183751	0.0445731	0.215006	0.161504	0.298292	0.0756445	0.271633	0.216477	0.354919	0.745609
0.00449294	-0.0137086	0.0204882	-0.0127894	0.464496	-0.0365065	0.122895	0.281929	0.761604	0.102855	0.347749	0.133191	0.3483	0.0936622	0.229347	0.850774	0.224199	0.314655	0.552562		-0.00359665	0.340578	0.444088	0.0475148	0.0949492		0.0206721	0.64596
0.0482502	0.101752	0.0315195	0.00247054	0.223647	-0.0808154	0.010744	0.414304	0.440411		0.355838	-0.0388966	0.276965	0.215925	0.394631	0.0778507	0.0348289	0.178419	0.237436	0.379739	0.169594	0.0298648	0.00817002	0.0337257	0.207284	0.0620393	0.0546851	0.237252

## Sheet: 161020
	War4µM	Dih4µM	Cic0.4µM	Cal0.4µM	Cor100µM	Wal+Dih	Wal+Cic	Wal+Cal	Wal+Cor	Dih+Cic	Dih+Cal	Dih+Cor	Cic+Cal	Cic+Cor	Cal+Cor	Mtz	noMtz	Normalization	War4uM	Dih4uM	Cic0.4uM	Cal0.4uM	Cor100uM	War+Dih	War+Cic	War+Cal	War+Cor	Dih+Cic	Dih+Cal	Dih+Cor	Cic+Cal	Cic+Cor	Cal+Cor	Mtz	noMtz
1	1680	2778	1915	2265	1031	3130	2032	1944		1902	1940	all die	621	2206	1360	1805	5320		0.359712	0.819307	0.458077	0.604578	0.0880576	0.966645	0.50705	0.470216		0.452636	0.468542		-0.0835579	0.579882	0.225768	0.412034	1.88332
2	3742	1046	1135	1107	875	3460	5376	2854	2149	1988	577		617	2330	1827	954	5182		1.22281	0.0943362	0.131589	0.119869	0.02276	1.10477	1.90676	0.851118	0.556024	0.488633	-0.101975		-0.0852322	0.631785	0.421243	0.0558273	1.82556
3	1328	1333		613	565	1375	2971	3059	3908	1632	1215		2169	3836	3491	1134	3905		0.212374	0.214467		-0.0869065	-0.106998	0.232047	0.900092	0.936926	1.2923	0.339621	0.165075		0.564395	1.26216	1.11775	0.131171	1.29104
4	1032	1731	1260	1405	1373	1393	2492	1873	2820	2259	1484		1241			137	4009		0.0884761	0.38106	0.183911	0.244604	0.23121	0.239581	0.699595	0.440497	0.836887	0.602067	0.277672		0.175958			-0.286148	1.33457
5	2363		1419	794	548	1759	3660	3818	783	2738	1970		1992		3423	954	3420		0.645598		0.250464	-0.0111445	-0.114114	0.39278	1.18849	1.25462	-0.0157489	0.802564	0.481099		0.490307		1.08929	0.0558273	1.08803
6	1350	1049	2000	1844	702	3437	2407	2144	2219	2024	4376		2104	1362		748	3135		0.221583	0.0955919	0.493656	0.428358	-0.0496534	1.09515	0.664016	0.553931	0.585324	0.503702	1.48819		0.537188	0.226606		-0.030399	0.968738
7	2416		1054	984	549	2662	1095	1195	1704	2379	2027		1087	1830	1317	732	1292		0.667783		0.0976848	0.0683846	-0.113695	0.770752	0.114846	0.156704	0.369758	0.652296	0.504957		0.111498	0.422498	0.20777	-0.0370961	0.197305
8	2036	581	1273	187	705	2128	3567	1431	1273	2945	1965		585	2515	5897	458	1653		0.508725	-0.100301	0.189353	-0.265219	-0.0483976	0.547233	1.14956	0.255487	0.189353	0.889209	0.479006		-0.0986266	0.709222	2.12484	-0.151785	0.348411
9	421		1233	1233	722	1941	1955	2104	815	1674	3032		625	1250	1350	341	1879		-0.167273		0.17261	0.17261	-0.0412819	0.46896	0.47482	0.537188	-0.00235448	0.357201	0.925625		-0.0818836	0.179725	0.221583	-0.200759	0.443009
10	3035	1007	1301	1227	327	1897	2954	2493	4692	2843	1091		1075	3254	1829	758	3862		0.92688	0.0780118	0.201073	0.170098	-0.206619	0.450543	0.892976	0.700013	1.62046	0.846514	0.113172		0.106475	1.01855	0.42208	-0.0262132	1.27304
11	1630	534	2179	711	394	1911	1200	3558		1900	957		801	2830	969	630	4283		0.338784	-0.119974	0.568581	-0.0458862	-0.178574	0.456403	0.158797	1.14579		0.451799	0.0570831		-0.00821452	0.841073	0.062106	-0.0797907	1.44926
12	2683	2632	990	320	559	5384	991	2339	1816	1927	1548		858			512	2570		0.779542	0.758195	0.070896	-0.209549	-0.109509	1.91011	0.0713146	0.635553	0.416638	0.4631	0.30446		0.0156442			-0.129182	0.732243
13	2234	1614	953	715	720	2136	1138	949	2070	2567	977		1316	668	2349	1862	9866		0.591602	0.332086	0.0554088	-0.0442119	-0.042119	0.550582	0.132845	0.0537345	0.522956	0.730988	0.0654545		0.207351	-0.0638849	0.639738	0.435893	3.78616
14	1220		1287	1040	426	2803	1729	2396	1124	2072	1996		1063	2839	1271	425	2010		0.167168		0.195213	0.0918247	-0.16518	0.829771	0.380222	0.659411	0.126985	0.523793	0.491982		0.101452	0.84484	0.188515	-0.165598	0.497842
15	1472	477	845	1452	486	2243	1818	2888	2703	1921	3056		1927	5144	1097	1196	3041		0.272649	-0.143833	0.0102027	0.264277	-0.140065	0.59537	0.417475	0.86535	0.787914	0.460589	0.93567		0.4631	1.80965	0.115683	0.157122	0.929392
16	902	1006	1240	1890	846	5340	1798	1036	1762	1139	1337		1220	2553	2609	817	6176		0.0340615	0.0775932	0.17554	0.447613	0.0106213	1.89169	0.409104	0.0901504	0.394035	0.133264	0.216141		0.167168	0.725128	0.748568	-0.00151733	2.24162
17	1479	1954	859	551	780	2428	3989	4359	1442	1197	739		925	1732	675	1468	3657		0.275579	0.474402	0.0160628	-0.112858	-0.0170046	0.672806	1.3262	1.48107	0.260092	0.157541	-0.0341661		0.0436887	0.381478	-0.0609549	0.270974	1.18723
18	1227	3040	3032	1159	422		1869	2432	2516	3478	858		1541	1539	428	1060	2397		0.170098	0.928973	0.925625	0.141635	-0.166854		0.438823	0.67448	0.70964	1.11231	0.0156442		0.30153	0.300693	-0.164343	0.100196	0.65983
19	926		1753	1233	597	1869	2679	2422	2255		2598		722	1680		736	1988		0.0441073		0.390268	0.17261	-0.0936037	0.438823	0.777868	0.670294	0.600392		0.743963		-0.0412819	0.359712		-0.0354218	0.488633
20	2382	2140	672	740	819	2923	3053	2785	2529	1682	1011		2247	2168	5159	976	6063		0.653551	0.552256	-0.0622106	-0.0337475	-0.000680183	0.88	0.934415	0.822237	0.715082	0.360549	0.0796861		0.597044	0.563976	1.81593	0.065036	2.19432
21	1040	1114	428	1037	394	1824	4825	3014	1251	2618	482		1833	633	535	1874	3685		0.0918247	0.122799	-0.164343	0.090569	-0.178574	0.419987	1.67613	0.91809	0.180144	0.752335	-0.14174		0.423754	-0.078535	-0.119555	0.440916	1.19895
22	691		848	977	906		1728	1868	1043	3096	2081		913	711	3235	211	1823		-0.0542577		0.0114585	0.0654545	0.0357358		0.379804	0.438404	0.0930804	0.952413	0.52756		0.0386658	-0.0458862	1.0106	-0.255173	0.419568
23	1629	1569	1453	182	860		1757	2299	5333	1735	1626		1085	2092	924	425	2053		0.338365	0.31325	0.264696	-0.267312	0.0164814		0.391942	0.61881	1.88876	0.382734	0.337109		0.110661	0.532165	0.0432701	-0.165598	0.51584
24	3798	709	443	660		3011	8596	1849	1649	1628	983		1903	2676	4804	630	1715		1.24625	-0.0467233	-0.158064	-0.0672335		0.916835	3.25457	0.430451	0.346736	0.337946	0.067966		0.453054	0.776612	1.66734	-0.0797907	0.374362
25	821	941	1109	1012	497	1522	2929	2595	2711	1634	2409		3265	2576	412	606	1926		0.000156965	0.0503859	0.120706	0.0801046	-0.135461	0.293578	0.882511	0.742708	0.791262	0.340458	0.664853		1.02315	0.734755	-0.17104	-0.0898365	0.462681
26	1551	1084	2004	1074	818	2920	3437	1830	2349	3005	1133		1349	1959		1286	2853		0.305716	0.110242	0.49533	0.106056	-0.00109876	0.878744	1.09515	0.422498	0.639738	0.914323	0.130752		0.221164	0.476494		0.194794	0.8507
27	1037	809	968	597	608	3490	3667	2121	2400	2343	1359		2066	779		307	1668		0.090569	-0.00486593	0.0616874	-0.0936037	-0.0889993	1.11733	1.19142	0.544303	0.661086	0.637227	0.22535		0.521282	-0.0174232		-0.21499	0.354689
28	938	2815	4860	1252	257	1643	1937	1801	2354	2474			584	1584		254	1511		0.0491302	0.834794	1.69078	0.180562	-0.235919	0.344225	0.467286	0.41036	0.641831	0.69206			-0.0990451	0.319529		-0.237175	0.288973
29	2702	1503	3096	1403	215	2299	2832	2829	2269	1459	720		987	695	3055	1090	2923		0.787495	0.285625	0.952413	0.243767	-0.253499	0.61881	0.84191	0.840654	0.606252	0.267207	-0.042119		0.0696403	-0.0525834	0.935252	0.112753	0.88
30	1527		2404	228	661	2638	1707	3692	1359	3213	2170		942	2805		439	1554		0.29567		0.66276	-0.248058	-0.0668149	0.760706	0.371014	1.20188	0.22535	1.00139	0.564814		0.0508044	0.830608		-0.159738	0.306972
31	2235	709	801	3764	372	2860	5336	2005	1320	1349	1849		2610	1191	914	484	2974		0.592021	-0.0467233	-0.00821452	1.23202	-0.187783	0.85363	1.89002	0.495749	0.209026	0.221164	0.430451		0.748986	0.155029	0.0390844	-0.140903	0.901347
32	2565	829	1286	1922	1215	3897	3148	4011	1598	2597	991		2328	1790	1778	951	2317		0.73015	0.00350556	0.194794	0.461007	0.165075	1.28769	0.974179	1.33541	0.325389	0.743545	0.0713146		0.630948	0.405755	0.400733	0.0545716	0.626344
N	32	25	31	32	31	29	32	32	30	31	31	0	32	29	24	32	32		32	25	31	32	31	29	32	32	30	31	31	0	32	29	24	32	32
Ave	1752.88	1400.16	1487.1	1111.81	653.194	2631.83	2833.5	2437.28	2140.53	2174.77	1630.87	#DIV/0!	1393.78	2042.31	2112.83	820.625	3209.69		0.390216	0.242578	0.278968	0.121884	-0.0700825	0.758123	0.842538	0.676691	0.55248	0.566812	0.339148	#DIV/0!	0.239908	0.511366	0.540885	7.15573e-18	1

## Sheet: 161116
	War4µM	Cic0.4µM	Pyr0.04µM	Dih4µM	Cal0.4µM	Art4µM	Cor100µM	War+Pyr	War+Art	Cic+Pyr	Cic+Art	Pyr+Dih	Pyr+Cal	Pyr+Art	Pyr+Cor	Dih+Art	Cal+Art	Art+Cor	Mtz	noMtz	Normalization	War4µM	Cic0.4µM	Pyr0.04µM	Dih4µM	Cal0.4µM	Art4µM	Cor100µM	War+Pyr	War+Art	Cic+Pyr	Cic+Art	Pyr+Dih	Pyr+Cal	Pyr+Art	Pyr+Cor	Dih+Art	Cal+Art	Art+Cor	Mtz	noMtz
	1646	1191	1853	637	464	475	378		1116		1982	1997	1163	866		641	920	575	543	3928		0.458318	0.295412	0.532431	0.0970617	0.0351219	0.0390603	0.00433105		0.26856		0.578617	0.583987	0.285387	0.179051		0.0984939	0.198385	0.0748637	0.0634066	1.27535
	2416	1203	964	467	851	996	1046		1247		1308	1315	732	1583		600	421	724	196	3031		0.734003	0.299709	0.214139	0.036196	0.173681	0.225596	0.243497		0.315462		0.337302	0.339808	0.131075	0.435761		0.0838145	0.0197265	0.128211	-0.0608311	0.954194
	565	880	1345	798	657	626	1505		1004		1232	2015	1032	1155		926	1175	807	652	2194		0.0712833	0.184064	0.35055	0.154705	0.104222	0.0931234	0.407835		0.22846		0.310092	0.590432	0.238485	0.282523		0.200533	0.289684	0.157927	0.102432	0.65452
	866	1024	1012	521	268	491	1288		1349		585	1209	1098			467	540	903	381	5861		0.179051	0.235621	0.231324	0.0555298	-0.0350526	0.0447888	0.330142		0.351982		0.078444	0.301857	0.262115			0.036196	0.0623325	0.192299	0.00540515	1.96743
	937	1187	956	1323	2260	780	1109		1878		1235	1621	899	690		663	542	511	615	3368		0.204472	0.29398	0.211274	0.342673	0.67815	0.148261	0.266054		0.541381		0.311166	0.449367	0.190867	0.116038		0.106371	0.0630486	0.0519495	0.089185	1.07485
	985	655	1507	958	1976	794	782		736		731			1048		455	1592	991	214	6454		0.221657	0.103506	0.408551	0.211991	0.576469	0.153273	0.148977		0.132507		0.130717			0.244214		0.0318996	0.438984	0.223806	-0.0543865	2.17974
	1103	1804	932	976	2461	575	709		2379		597	1466	1528			403	1524	1480	295	4502		0.263905	0.514887	0.202682	0.218435	0.750115	0.0748637	0.12284		0.720756		0.0827404	0.393872	0.41607			0.0132819	0.414638	0.398884	-0.0253857	1.48086
	1969	759	1908	1023	1209	599			1695		739	666	1406			509	2169	1684	835	2875		0.573962	0.140742	0.552122	0.235263	0.301857	0.0834565			0.475861		0.133581	0.107445	0.37239			0.0512334	0.645569	0.471923	0.167952	0.898341
	2491	1246	1670	532	325	519	1607		1406		1174	840	384			385	541	872	325	2437		0.760856	0.315104	0.46691	0.0594682	-0.0146447	0.0548138	0.444354		0.37239		0.289326	0.169743	0.00647925			0.00683729	0.0626905	0.1812	-0.0146447	0.741522
	3567	397	191	718	362	367	1088		628		1105		505	840		767	2309	1069	441	2063		1.1461	0.0111337	-0.0626212	0.126062	-0.00139749	0.000392682	0.258535		0.0938394		0.264621		0.0498013	0.169743		0.143606	0.695694	0.251732	0.0268872	0.607618
	697	1594	777		185	917	810		1513		1819		810			806	1488	795	201	4027		0.118544	0.4397	0.147186		-0.0647694	0.197311	0.159002		0.410699		0.520257		0.159002			0.157569	0.401748	0.153631	-0.0590409	1.3108
	2280	2213	655	1466	1215	261	1495		1635		1373	1188	1678	949		468	1435	1067	546	1202		0.685311	0.661323	0.103506	0.393872	0.304005	-0.0375589	0.404255		0.454379		0.360574	0.294338	0.469775	0.208768		0.0365541	0.382773	0.251016	0.0644807	0.299351
	735	771	432	425	340	345	697		2937		885		1279	747		397	756	396	472	2845		0.132149	0.145038	0.0236649	0.0211586	-0.00927422	-0.00748406	0.118544		0.920539		0.185854		0.326919	0.136445		0.0111337	0.139668	0.0107757	0.0379862	0.8876
	1280	1670	892	569	1287	451			1103		2720	3747	575	501		421	325	718	217	3753		0.327277	0.46691	0.18836	0.0727155	0.329784	0.0304675			0.263905		0.842846	1.21055	0.0748637	0.0483692		0.0197265	-0.0146447	0.126062	-0.0533124	1.21269
	3631	443	670	426	1732	676	1501		1791		3381	1786	1553	886		639	1053	1000	388	1155		1.16901	0.0276032	0.108877	0.0215167	0.489108	0.111025	0.406403		0.510232		1.07951	0.508442	0.42502	0.186212		0.0977778	0.246004	0.227028	0.00791139	0.282523
	1012	1267	787		340	443	984		1877		787	370	625	1100		668	1388	637	238	3135		0.231324	0.322623	0.150767		-0.00927422	0.0276032	0.221299		0.541023		0.150767	0.00146678	0.0927653	0.262831		0.108161	0.365945	0.0970617	-0.0457936	0.99143
	1028	1563	1753	562	695	873	1120		1933		1736		470	2494		1560	4110	1043	419	1955		0.237053	0.428601	0.496627	0.0702092	0.117828	0.181558	0.269992		0.561073		0.490541		0.0372701	0.76193		0.427527	1.34051	0.242423	0.0190104	0.56895
	539	1041	1355		248	427	338		1757		2190	1267	1111	763		716	1548	291	327	2483		0.0619745	0.241707	0.35413		-0.0422133	0.0218747	-0.00999029		0.498059		0.653088	0.322623	0.26677	0.142174		0.125346	0.42323	-0.0268179	-0.0139287	0.757992
	1318	674	944	711	1447	489	449		2346		1482	2234	1730	1188		538	496	571	190	2173		0.340883	0.110309	0.206978	0.123556	0.387069	0.0440728	0.0297514		0.708941		0.3996	0.668841	0.488392	0.294338		0.0616164	0.046579	0.0734315	-0.0629793	0.647001
	1970	1467	517		504	653	485		2598		585		1210	1444		554	1186	1208	268	4500		0.57432	0.39423	0.0540977		0.0494433	0.10279	0.0426406		0.799166		0.078444		0.302215	0.385995		0.067345	0.293622	0.301499	-0.0350526	1.48015
	674	1847	1203		205	233	1326		2638		811	954	777	780		322	948	478		3322		0.110309	0.530282	0.299709		-0.0576088	-0.0475838	0.343747		0.813487		0.15936	0.210558	0.147186	0.148261		-0.0157188	0.20841	0.0401344		1.05838
	1111	1420	2115	1093	388	414	343		2687		2808	1158	2086			634	1417	1538	153	1524		0.26677	0.377402	0.626235	0.260325	0.00791139	0.0172203	-0.00820012		0.831031		0.874353	0.283597	0.615852			0.0959876	0.376328	0.41965	-0.0762265	0.414638
	1940	2005	435	1275	609	437	547		1135		1479	1604	626			444	1121	1349	220	2176		0.563579	0.586852	0.024739	0.325487	0.0870368	0.025455	0.0648387		0.275362		0.398526	0.44328	0.0931234			0.0279613	0.27035	0.351982	-0.0522383	0.648075
	733	749	1048		704	533	503		1148		1530	875	1225	942		533	473	1361	333	3567		0.131433	0.137162	0.244214		0.12105	0.0598263	0.0490852		0.280017		0.416786	0.182274	0.307585	0.206262		0.0598263	0.0383442	0.356278	-0.0117805	1.1461
	1307	997	555		976	1439	598		1184		2384	2533	1103	513		373	2193	413	247	1957		0.336944	0.225954	0.067703		0.218435	0.384205	0.0830984		0.292906		0.722546	0.775893	0.263905	0.0526656		0.00254088	0.654162	0.0168622	-0.0425713	0.569666
	2191	2043	1040	743	240	497	416		1699		1864	2113	2113	969		482	597	772	605	6669		0.653446	0.600457	0.241349	0.135013	-0.0450776	0.046937	0.0179363		0.477293		0.536369	0.625519	0.625519	0.215929		0.0415665	0.0827404	0.145396	0.0856047	2.25672
	2390	1320	1297		437	834	746		1250		647	1367	294	330		637	987	365	513	2002		0.724695	0.341599	0.333364		0.025455	0.167594	0.136087		0.316536		0.100642	0.358426	-0.0257438	-0.0128546		0.0970617	0.222373	-0.000323385	0.0526656	0.585778
	579	710	889	2730	438	356	292		1033		750	543	606	1786		497	390	666	267	2408		0.0762958	0.123198	0.187286	0.846426	0.0258131	-0.00354569	-0.0264598		0.238843		0.13752	0.0634066	0.0859627	0.508442		0.046937	0.00862745	0.107445	-0.0354107	0.731139
	1289	1027	1225		299	1060			1369		1252	930	592	1618		429	445	774	261	4367		0.3305	0.236695	0.307585		-0.0239536	0.24851			0.359142		0.317252	0.201966	0.0809502	0.448293		0.0225908	0.0283193	0.146112	-0.0375589	1.43253
	563	2942	2141	806	729	1578	1007		1860		542	988	1775	691		411	1831	838	387	3036		0.0705673	0.922329	0.635544	0.157569	0.130001	0.433971	0.229534		0.534937		0.0630486	0.222732	0.504504	0.116396		0.0161462	0.524554	0.169026	0.00755335	0.955984
	1208	715	809	1079	279	548	782		1641		2515	2060	492	853		969	3385	573	278	1927		0.301499	0.124988	0.158644	0.255313	-0.0311143	0.0651968	0.148977		0.456527		0.769449	0.606543	0.0451469	0.174397		0.215929	1.08094	0.0741476	-0.0314723	0.558925
	1582	1280	1144	1139	827	564	427		812		1216	1050	180	718		817	835	1258	316	4190		0.435403	0.327277	0.278585	0.276795	0.165088	0.0709253	0.0218747		0.159718		0.304363	0.24493	-0.0665596	0.126062		0.161508	0.167952	0.319401	-0.017867	1.36915
N	32	32	32	23	32	32	29		32		32	26	31	25		32	32	32	31	32		32	32	32	23	32	32	29	0	32	0	32	26	31	25	0	32	32	32	31	32
Ave	1456.31	1253.25	1094.41	912.043	779.906	632.812	840.621		1605.75		1420.12	1457.54	1021.19	1018.16		597.844	1254.38	866.469	365.903	3158.94		0.390403	0.3177	0.260829	0.195537	0.148227	0.0955625	0.169965	#DIV/0!	0.443907	#DIV/0!	0.377447	0.390842	0.234616	0.23353	#DIV/0!	0.0830425	0.318103	0.179219	7.72232e-18	1

## Sheet: 190711
	war4µM	cic0.4µM	pz0.04µM	dih4µM	cal0.4µM	art4µM	cor100µM	war+cic	war+pz	war+dih	war+cal	war+art	war+cor	cic+pz	cic+dih	cic+cal	cic+art	cic+cor	pz+dih	pz+cal	pz+art	pz+cor	dih+cal	dih+art	dih+cor	cal+art	cal+cor sick	art+cor	Mtz	noMtz	Normalization	war4µM	cic0.4µM	pz0.04µM	dih4µM	cal0.4µM	art4µM	cor100µM	war+cic	war+pz	war+dih	war+cal	war+art	war+cor	cic+pz	cic+dih	cic+cal	cic+art	cic+cor
	724	1526	2196	1439	246	1488	288	3355	3227		3502	3405	2174	3383	2644	1778	1622	3176	5364	347	1722	2229		2362		860		850	338	3890		0.0152271	0.13599	0.236876	0.12289	-0.0567487	0.130268	-0.0504244	0.411395	0.392121		0.43353	0.418924	0.233564	0.415611	0.304335	0.173935	0.150445	0.384442
	2547	1684	2786	1287	1001	1206	386	8430	5719	1160	1526	1927	1599	874	2735	2048	2351	4605	1508	1047	1310	1323		926		1507	3206	1323	429	9651		0.289729	0.159781	0.325717	0.100002	0.0569369	0.0878052	-0.0356679	1.17557	0.767359	0.0808786	0.13599	0.196371	0.146982	0.0378136	0.318037	0.214591	0.260216	0.599616
	3463	685	2298	2372	219	1393	1020	2358	1229	1779	1236	3873	3918	1688	1365	807	1204	4338	1460	2376	2355			1397		584		2170	568	2361		0.427657	0.00935459	0.252235	0.263378	-0.0608142	0.115963	0.0597979	0.26127	0.0912684	0.174086	0.0923225	0.489394	0.49617	0.160383	0.111747	0.027725	0.087504	0.559412
	636	1403	1551	733	671	873	529	1823	2758	2721	1021	3416	1953	3097		1792	3386	2241	889	1094	2524	1815		1892		1819		1479	614	3400		0.00197632	0.117469	0.139754	0.0165823	0.00724651	0.037663	-0.0141354	0.180711	0.3215	0.315929	0.0599484	0.42058	0.200286	0.372546		0.176043	0.416063	0.243652
	481	1490	1306	328	687	940		2602	3743	1760	978	3738	5380	1083		963	1798	1324	2727	525	1718			1485		775		699	1040	6350		-0.0213631	0.130569	0.102863	-0.0444014	0.00965574	0.0477517		0.298011	0.469819	0.171225	0.0534736	0.469066	0.716313	0.0692842		0.051215	0.176947	0.105573
	2390	2567	1425	1491	747	861	1586	1705	1292		4206	2261	800	357		940	824	1296	2012	1236	2756			1358		1381	2087		180	8516		0.266088	0.29274	0.120781	0.13072	0.0186904	0.0358561	0.145024	0.162943	0.100755		0.539536	0.246664	0.0266709	-0.0400346		0.0477517	0.0302848	0.101357
	1903	1902	1444	1459	508	1858	410	1799	1500		3768	890	661	1221		1155	1485		1113	572	2054	816				1092	2459	1966	368	9492		0.192757	0.192607	0.123642	0.125901	-0.0172975	0.185981	-0.0320541	0.177097	0.132075		0.473583	0.0402229	0.00574074	0.0900638		0.0801257	0.129816
	1054	1788	690	447	189	1135	1579	2009	2283	2499	1412	1051	5235	1683	2464	1172	2363	1373	2321	1305	3267	552		1147		541	4506	1022	395	2132		0.0649175	0.175441	0.0101075	-0.0264827	-0.0653316	0.0771142	0.14397	0.208718	0.249976	0.282501	0.118824	0.0644657	0.694479	0.15963	0.277231	0.0826855	0.262023	0.112951
	4228	1101	1174		824	1714	1613	3407	5993		934	2262	5199	2584	3146	1249	2216	2989	4087	609	2279	363		1174		1576		1335	559	8807		0.542849	0.0719946	0.0829867		0.0302848	0.164298	0.14909	0.419225	0.808617		0.0468482	0.246814	0.689059	0.2953	0.379924	0.09428	0.239888	0.356284
	1116	3575	3714	1363	636	1268	851	2939	10422	2333	2166	2843	2107	2078	3275	2168	1006	4458	1708	892	4579	1847		1203		533	6527	1604	333	6754		0.0742532	0.444522	0.465452	0.111446	0.00197632	0.0971409	0.0343504	0.348755	1.47552	0.257505	0.232359	0.3343	0.223475	0.219108	0.399349	0.23266	0.0576898	0.577481
	3552	2577	3147		593	967	948	2833	2779		1263	4327	5638	2422	2291	1174	2240	4521	688	1885	3765	848		2920		1366	4264	928	740	5134		0.441059	0.294246	0.380075		-0.00449848	0.0518173	0.0489563	0.332794	0.324663		0.096388	0.557756	0.755162	0.270907	0.251181	0.0829867	0.243502	0.586968
	1361	996	428	1549	565	1511	703	2812	3202	1077	1435	2195	2300	1776	4200	250	2016	2109	1431	1818	2394	2636		1762		1449	823	1470	267	8606		0.111145	0.056184	-0.0293437	0.139453	-0.00871464	0.133731	0.012065	0.329632	0.388357	0.0683807	0.122287	0.236726	0.252536	0.173634	0.538632	-0.0561464	0.209772	0.223776
	912	508	3812	1708	317	1404	1767	3076	1540	6437	1521	3678	3694	1085		4313	2725		836	1311	3007	3085		1221		1201	6381	1770	397	9839		0.0435355	-0.0172975	0.480209	0.163395	-0.0460577	0.117619	0.172279	0.369384	0.138098	0.875473	0.135237	0.460031	0.46244	0.0695853		0.555648	0.316531
	2634	636	554	1104	487	762		2365	1781		1914	1540	787	1863	4657	483	2737	2469	1240	2069	2395			1658		1282		592	583	6895		0.302829	0.00197632	-0.010371	0.0724463	-0.0204596	0.020949		0.262324	0.174387		0.194414	0.138098	0.0247134	0.186734	0.607446	-0.0210619	0.318338	0.277984
	1022	1822	2316	748	405	626	937	2730	3473	1458	2035	2602	1272	1530	8367	3758	3346	2037	3031	977	2881	4398		1570		1442	1130	565	300	14271		0.060099	0.180561	0.254946	0.0188409	-0.0328069	0.000470553	0.0473	0.317284	0.429163	0.125751	0.212633	0.298011	0.0977432	0.136592	1.16609	0.472077	0.41004	0.212935
	1150	1352	2306		722	1846	839	1696	2384	1426	585	2516	955	2962	6127	2829	4310	3094	1820	2196	2855	1328		1620		415	2735	803	342	17133		0.0793728	0.109789	0.25344		0.0149259	0.184174	0.0325434	0.161588	0.265185	0.120932	-0.0057031	0.285061	0.0500104	0.352218	0.828794	0.332191	0.555196	0.372094
	1847	1735	4754		673	1265	589	4665	4710	3715	1222	3670	2603	2115	1710	1836	2497	5238	1769	1303	2476	2095		1706		919	3975	931	206	6528		0.184325	0.16746	0.622052		0.00754767	0.0966892	-0.00510079	0.608651	0.615427	0.465603	0.0902144	0.458827	0.298161	0.22468	0.163696	0.182669	0.2822	0.694931
	2350	3032	3698	606	1199	1344		2316	2591		3512	3339	5130	2321	9929	1019	1552	6214	1762	1502	3325	1578		1421		1492	2973	2024	405	5196		0.260065	0.362759	0.463043	-0.00254099	0.0867511	0.108585		0.254946	0.296354		0.435035	0.408986	0.678669	0.255698	1.40129	0.0596473	0.139905	0.841894
	1386	2286	1399	739	1476	1416	384	3692	5258	2455	2989	2591	1600	3077	2720	3463	2148	2811	1217	588	3220			1300		786		792	685	5505		0.114909	0.250428	0.116866	0.0174857	0.128461	0.119426	-0.0359691	0.462139	0.697943	0.275876	0.356284	0.296354	0.147132	0.369535	0.315779	0.427657	0.229649	0.329481
	1988	832	3573	1979	486	2280	882	1485	4671	910	1537	2459	2146	6846	4659	890	839	6305	3792	4437	2242	1832		880		773	1752	646	209	4378		0.205556	0.0314894	0.444221	0.204201	-0.0206102	0.249525	0.0390182	0.129816	0.609554	0.0432344	0.137646	0.276478	0.229347	0.937059	0.607747	0.0402229	0.0325434	0.855597
	393	2438	541		835	1100	984	1820	3907		3763	4994	3953	4150	4476	2787	1907	1728	641	804	1472	1178		1336		3375	1140	1921	743	16153		-0.0346139	0.273316	-0.0123285		0.0319411	0.071844	0.0543771	0.180259	0.494513		0.47283	0.65819	0.50144	0.531104	0.580192	0.325867	0.19336	0.166406
	2038	2276	3699		2159	1896	250	4767	4661		4764	3290	1374	3383	6343	4768	2218	2868	3003	840	2472	707		1604		2583	2659	611	264	6168		0.213085	0.248922	0.463193		0.231305	0.191703	-0.0561464	0.624009	0.608048		0.623558	0.401607	0.113102	0.415611	0.861319	0.62416	0.240189	0.338064
	1299	1362	1854	1364	1544	1559	932	2921	2331	4150	3824	2365		2412	5747	424	2864	1578	3098	1047	971	2473		1555		2053	6002	794	213	7994		0.101809	0.111295	0.185379	0.111596	0.1387	0.140959	0.0465471	0.346045	0.257204	0.531104	0.482015	0.262324		0.269401	0.771575	-0.029946	0.337462	0.14382
	1071	1414	1748	622	455	742	1299	6559	3103	3672	487	2385	942	1963	3272	2390	1578	2978	3655	230	1752	1893		829		1983	1237	627	514	6605		0.0674773	0.119125	0.169418	-0.000131755	-0.0252781	0.0179375	0.101809	0.893843	0.37345	0.459128	-0.0204596	0.265335	0.0480529	0.201792	0.398897	0.266088	0.14382	0.354627
	817	1371	1224		1001	1379	711	6032	3501	4205	6476	10643	2211	3794	1666	1601	1597	3471	438	1024	1478	2552		799		1261	1402	2250	1183	4114		0.0292307	0.11265	0.0905155		0.0569369	0.113855	0.0132696	0.814489	0.433379	0.539385	0.881345	1.5088	0.239135	0.477498	0.157071	0.147283	0.146681	0.428862
	1600	3824	665	1212	395	1562	851	7718	3296		2228	3452	2275	1223	3778	2712	2056	3716	1538	3106	1660	994		1176		1644	1395	1863	1518	7927		0.147132	0.482015	0.00634305	0.0887086	-0.0343127	0.141411	0.0343504	1.06836	0.402511		0.241695	0.426001	0.248772	0.090365	0.475089	0.314574	0.215796	0.465753
	893	2459	2324		520	924	428	1091	4343	2672	1763	3396	1495	2120	3955	1945	1708	2723	1560	1189	2603			1083		1756	3285	945	1380	9371		0.0406746	0.276478	0.25615		-0.0154906	0.0453425	-0.0293437	0.0704888	0.560165	0.308551	0.171676	0.417569	0.131322	0.225432	0.501741	0.199081	0.163395	0.31623
	1451	1939	2413		610	634	2450	4757	2698	3926	3464	4110	1821	2275	4317	3744	2161	3788		506	2042	1633		1745		2874	3250	636	965	6463		0.124696	0.198178	0.269551		-0.00193868	0.00167517	0.275123	0.622504	0.312466	0.497374	0.427808	0.52508	0.18041	0.248772	0.55625	0.469969	0.231606	0.476595
	2874	2874	3043		1379	1009	736	7104	2558		2379	3930	1789	1656	3245	1998	2454	1075		1336	2486	1326		1697		1463	4555	1127	899	11126		0.338967	0.338967	0.364415		0.113855	0.0581415	0.017034	0.975908	0.291385		0.264432	0.497977	0.175591	0.155565	0.394831	0.207062	0.275725	0.0680796
	2590	1431	954		506	1020	970	2643	1942	2932	1419	4777	3094	2708	3214	2636	1711	877	3411	920	2371	798		1159		1669	3590	1411	2257	2364		0.296204	0.121685	0.0498598		-0.0175987	0.0597979	0.052269	0.304184	0.19863	0.347701	0.119878	0.625515	0.372094	0.313972	0.390164	0.30313	0.163846	0.0382654
	1276	3588	3133		518	709	963	2143	2266	3654	2540	3704	2613	718	4350	1661	1550	1584	2543	772	2818	1252		1611		1979	1109	538	387	4768		0.0983455	0.446479	0.377967		-0.0157918	0.0129684	0.051215	0.228896	0.247417	0.456417	0.288675	0.463946	0.299667	0.0143236	0.561219	0.156318	0.139604	0.144723
	2561	1988	1056	1042	1426	702	950	3673	2766		2574	1193	1291	2759	4276	1875	2621	1752	855	781	1094	1994		1033		624	2900	1303	651	4557		0.291837	0.205556	0.0652186	0.0631105	0.120932	0.0119144	0.0492575	0.459278	0.322705		0.293794	0.0858477	0.100604	0.321651	0.550076	0.188541	0.300871	0.17002
N	32	32	32	20	32	32	29	32	32	20	32	32	31	32	27	32	32	30	30	32	32	26		31		32	25	31	32	32	N	32	32	32	20	32	32	29	32	32	20	32	32	31	32	27	32	32	30
Ave	1737.72	1889.41	2100.78	1179.6	749.969	1231.03	925.345	3416.41	3372.72	2747.05	2326.34	3213.19	2516.42	2287.69	4034.37	1957.12	2096.56	2957.87	2050.57	1270.12	2385.72	1674.81		1439.65		1408.03	3013.68	1193.39	622.875	7264	Ave	0.16787	0.19071	0.222539	0.0838299	0.0191374	0.0915743	0.045545	0.420641	0.414063	0.319852	0.256503	0.390041	0.285124	0.250682	0.513692	0.200907	0.221903	0.351596
[truncated: 12 more columns]

## Sheet: 190807
	war4µM	cic0.4µM	pz0.04µM	dih4µM	cal0.4µM	art4µM	cor100µM	war+cic	war+pz	war+dih	war+cal	war+art	war+cor	cic+pz	cic+dih	cic+cal	cic+art	cic+cor	pz+dih	pz+cal	pz+art	pz+cor	dih+cal	dih+art	dih+cor	cal+art	cal+cor sick	art+cor	Mtz	noMtz	Normalization	war4µM	cic0.4µM	pz0.04µM	dih4µM	cal0.4µM	art4µM	cor100µM	war+cic	war+pz	war+dih	war+cal	war+art	war+cor	cic+pz	cic+dih	cic+cal	cic+art	cic+cor
	1425	2229	2513	1245	854	1779	1447	2635	4941		2896	3835	1670	1347	4187		1799	3051	3932	1015	1020	1226		3029		1553	1611	2688	1199	10729		0.093379	0.206049	0.245847	0.0681544	0.0133611	0.142987	0.096462	0.262944	0.586098		0.29952	0.431108	0.127712	0.0824484	0.480436		0.14579	0.321241
	4443	1377	1051	1823	1002	1460	1090	2715	3454	4280	3995	2283	4204	918	3375	3340	1584	1433	2373	2935	2460	3002		1521		1072	4536	3581	506	5437		0.516311	0.0866524	0.040968	0.149153	0.0341013	0.0982838	0.0464333	0.274155	0.377716	0.493468	0.453529	0.213616	0.482818	0.0223299	0.366645	0.36174	0.115661	0.0945001
	1993	2717	1833	1597	1783	1430	958	5300	3785		4318	1180	3190	650	3175	2267	2726	2053	1105	430	2034	1752		2721		902	1517	1409	550	10611		0.172976	0.274435	0.150555	0.117482	0.143548	0.0940797	0.0279353	0.636407	0.424101		0.498794	0.0590456	0.34072	-0.0152267	0.338618	0.211374	0.275696	0.181385
	669	3657	522	2697	762	1313	807	2215	4077	3933	1311	5856	1752	2923	4149	945	1643	3020	1413	1700	3733	3857		1908		3345	2508	2805	632	6065		-0.0125641	0.406163	-0.0331641	0.271632	0.000468581	0.0776837	0.00677472	0.204087	0.465021	0.444841	0.0774034	0.714323	0.139204	0.303303	0.47511	0.0261135	0.123929	0.316897
	896	1182	2623	1305	2638	1866	1007	1596	6987		3741	2515	2648	2103	7671	1438	1565	2488	1634	1587	2971	1459		1976		1502	6712	971	431	1916		0.0192469	0.0593259	0.261262	0.0765626	0.263364	0.155179	0.034802	0.117342	0.872817		0.417935	0.246128	0.264766	0.188391	0.968671	0.0952008	0.112998	0.242344
	3177	4644	1945		769	1065	1084	3461	3263		1320	1012		937	8041	2399	3609	1242	1697	1876	4127	2953		1742		1192	1577	1652	294	5157		0.338898	0.544478	0.16625		0.00144954	0.0429299	0.0455925	0.378697	0.35095		0.0786647	0.0355027		0.0249924	1.02052	0.229872	0.399437	0.067734
	3260	2328	1030	901	986	3200	642		3216	1391	3602	1087	2142	2461	3596	1264	1215	3684	2525	933	2597	2520		1760		2333	1299	2678	545	15553		0.350529	0.219922	0.0380251	0.0199475	0.0318591	0.342121	-0.0163478		0.344363	0.0886144	0.398456	0.0460129	0.193857	0.23856	0.397615	0.070817	0.0639504	0.409947
	938	2855	4538		881	1654	545	2776	1580	4364	3275	4133	3097	2385		1426	2522	2665	2204	2479	3602	1191		1051		1188	2255	3304	251	14644		0.0251326	0.293774	0.529624		0.0171448	0.12547	-0.029941	0.282703	0.1151	0.50524	0.352631	0.472868	0.327687	0.22791		0.0935191	0.247109	0.267148
	2461	1832	1893		447	1503	821	2541	6476	2690	3275	4766	3204	1813	1701	1774	1256	2254	3721	2473	1713	1898		2084		1253	4188	2720	788	18121		0.23856	0.150414	0.158963		-0.0436744	0.10431	0.00873663	0.249771	0.801208	0.270652	0.352631	0.561575	0.342682	0.147752	0.132057	0.142287	0.0696959	0.209552
	1190	1910	2127	1160	333	1424	760	4037	1011	4960	2888	2632	2785	2465	4315	1761	2648	4184	3642	3204	2675	2483		1804		935	10013	2489	727	5475		0.0604469	0.161345	0.191755	0.0562429	-0.0596499	0.0932389	0.000188308	0.459415	0.0353625	0.588761	0.298399	0.262524	0.283964	0.239121	0.498373	0.140465	0.264766	0.480015
	1779	5963	2799		1072	1371	786	3390	1871		2182	4340	4321	869	6131	2530	1085	2148	2187	1480	3356	1747		3223		979	2644	1172	1301	8201		0.142987	0.729318	0.285926		0.0439109	0.0858116	0.00383185	0.368747	0.15588		0.199462	0.501877	0.499214	0.0154632	0.752861	0.24823	0.0457326	0.194698
	2145	1422	1613	1498	827	1275	1166	3034	1911		995	2454	2133	2346	4147	915	4292	1229	2926	2620	3670	1539		1681		1653	1654	1592	405	9463		0.194277	0.0929586	0.119725	0.103609	0.00957745	0.0723585	0.0570837	0.318858	0.161485		0.0331204	0.237579	0.192596	0.222445	0.47483	0.0219094	0.49515	0.0659123
	2272	1546	1696	2671	1566	3042	998	3361	1124		2230	3099	3054	1226		1546	1951	2823	724	693	1623	3580		1738		1500	3795	1463	791	8815		0.212074	0.110335	0.131356	0.267989	0.113138	0.31998	0.0335408	0.364683	0.0511979		0.206189	0.327967	0.321661	0.0654919		0.110335	0.167091	0.28929
	1404	1036	2438	1255	1820	1074	1060	1372	2343		2817	1998	5068	1360		2798	1191	3727	854	1329	2091	3895		2245		1170	2103	1703	332	18572		0.0904361	0.0388659	0.235337	0.0695558	0.148733	0.0441911	0.0422292	0.0859518	0.222024		0.288449	0.173677	0.603896	0.0842701		0.285786	0.0605871	0.415973
	1363	3063	890	1398	536	2506	1134	3310	3757	2575	2084	4635	2378	915		997	765	2289	3814	1754	3830	6390		1579		2415	5169	1474	321	8768		0.0846905	0.322922	0.018406	0.0895953	-0.0312022	0.244866	0.0525993	0.357536	0.420177	0.254536	0.185729	0.543217	0.226929	0.0219094		0.0334006	0.00088899	0.214457
	609	4324	2420	1269	6729	1251	1519	1910	4993		2191	1780	1398	1866	2407	2225	1487	1702	1602	2619	2770	593		789		592	3237	1414	874	2512		-0.0209723	0.499634	0.232815	0.0715177	0.836662	0.0689953	0.106552	0.161345	0.593386		0.200723	0.143127	0.0895953	0.155179	0.230993	0.205488	0.102067	0.132197
	1378	4151	4604		1547	1153	1414	5812	9297	5388	3399	2941	2556	3899	5769	795	3313	2542		721	2206	4097		2019		1802	1877	1170	484	7460		0.0867926	0.475391	0.538873		0.110476	0.0552619	0.0918375	0.708157	1.19653	0.648739	0.370008	0.305826	0.251873	0.440076	0.702131	0.00509308	0.357956	0.249911
	2858	5057	1961		2083	1280	1495	7621	2786	2791	3376	3795	1760	3445	7097	2612	1456	2471	2845	844	3484	1865		1788		2239	1509	3105	763	9912		0.294194	0.602354	0.168492		0.185589	0.0730592	0.103189	0.961664	0.284105	0.284805	0.366785	0.425502	0.140325	0.376454	0.888232	0.259721	0.0977232	0.239962
	1156	3051	2248	2053	804	1603	2447	2844	3282		4684	3782	1400	2983	4436	590	2742	1615	1123	2720	2894	1924		1855		1469	6250	1124	1013	6860		0.0556823	0.321241	0.208711	0.181385	0.00635431	0.118323	0.236598	0.292233	0.353612		0.550083	0.42368	0.0898756	0.311711	0.51533	-0.0236349	0.277939	0.120005
	1153	2850	4154		2121	1176	901	2442	2253		1883	3775	1617	3345	893	3180	1848	4214	2917	1735	2054	2146		2333		2083	4074	1409	942	3980		0.0552619	0.293073	0.475811		0.190914	0.058485	0.0199475	0.235898	0.209412		0.157561	0.422699	0.120285	0.362441	0.0188264	0.339318	0.152657	0.484219
	2616	1502	3063		2957	809	2064	3237	2262		4578	3871	901	2093	3842	615	2373	2554	1297	2790	1857	3224		2133		1249	2852	1338	388	4282		0.260281	0.104169	0.322922		0.308068	0.00705499	0.182926	0.347306	0.210673		0.535229	0.436153	0.0199475	0.18699	0.432089	-0.0201315	0.226228	0.251593
	2022	1936	2695	1232	3569	1211	1620	4651	2821	2268	3535	4079		5613	6435	1239	2738		1469	1971	6033	1257		1554		1801	1788	2551	624	2247		0.17704	0.164989	0.271352	0.0663327	0.393831	0.0633898	0.120706	0.545459	0.289009	0.211514	0.389067	0.465301		0.68027	0.795462	0.0673136	0.277378
	3367	6663	982	1207	904	1001	734	3970	3442	2190	4679	4903	1807	3834		663	1090	2341	1184	1768	8561	3623		1823		1730	4842	2183	1252	10106		0.365524	0.827413	0.0312986	0.0628293	0.0203679	0.0339612	-0.00345524	0.450026	0.376034	0.200583	0.549383	0.580773	0.146911	0.430968		-0.0134049	0.0464333	0.221744
	3139	1888	2310		2465	1974	1074	2066	6415		1413	2941	5147	3791		711	1388		526	2034	4203	1207		1393		1053	2755	1543	1300	12510		0.333573	0.158262	0.2174		0.239121	0.170314	0.0441911	0.183206	0.792659		0.0916974	0.305826	0.614967	0.424942		-0.00667837	0.0881939
	948	1592	4958		649	1688	1508	5113	7252		3770	2820		1390	2551	1675	1747	3130	754	1885	1145	2673		2205		1431	4177	1555	617	5280		0.0265339	0.116782	0.588481		-0.0153668	0.130235	0.10501	0.610202	0.909954		0.421999	0.288869		0.0884742	0.251173	0.128413	0.138503	0.332312
	4016	2814	2149	2060	839	1169	1230		3714		1775	5711	1093	5184	3722	1314	1690	4520	843	4060	2719	1236		1485		1377	4991	2018	1843	7435		0.456472	0.288028	0.194838	0.182366	0.0112591	0.0575041	0.0660524		0.414151		0.142427	0.694003	0.0468537	0.620152	0.415272	0.0778239	0.130515	0.527101
	4383	3648	714	1300	1688	1751		4532	6344	2742	3858	4375	2413	2191	7327	2377		2017	2374	2651	3218	252		3334		2157	4023	1362	580	7169		0.507902	0.404902	-0.00625796	0.0758619	0.130235	0.139063		0.528783	0.78271	0.277939	0.434331	0.506781	0.231834	0.200723	0.920464	0.226789		0.17634
	7541	965	1757		942	1453	1891	9341	4740	6941	3740	2578	3406	2553	2405	609	3170	3034	2139	2326	2622	2805		1358		985	1982	1634	880	5857		0.950453	0.0289163	0.139904		0.0256931	0.0973028	0.158683	1.2027	0.557931	0.866371	0.417795	0.254956	0.370989	0.251453	0.230713	-0.0209723	0.337917	0.318858
	3745	1852	1334		913	1242	1090	3407	5924		1798	4386	3088	1112	3399	2551	2682	939	710	714	3725			2325		1493	5395	1463	525	4322		0.418495	0.153217	0.0806266		0.0216292	0.067734	0.0464333	0.371129	0.723853		0.14565	0.508323	0.326426	0.0495163	0.370008	0.251173	0.26953	0.0252727
	1723	1320	3632		584	843	1343	956	3151	2060	217	2296	3664	5193	3582	1895	1852	1685	1566	3666	5124			769		1019	1779	1178	461	1533		0.13514	0.0786647	0.40266		-0.0244757	0.0118196	0.0818878	0.027655	0.335254	0.182366	-0.0759057	0.215438	0.407144	0.621413	0.395653	0.159243	0.153217	0.129814
	1930	2612	2105		1260	1226	483	3304	2230		1743	1645	1198	3584	3418	1358	1357	1808	1626	1888	3110	1501		1276		2479	2818	2185	2070	8844		0.164148	0.259721	0.188672		0.0702565	0.0654919	-0.0386295	0.356695	0.206189		0.137942	0.124209	0.061568	0.395933	0.372671	0.0839899	0.0838497	0.147051
	4270	6535	2844		835	2703	1034	2947	1902		4685	1643	3821	1137	6707	1562	1694	1307	888	2300	1028	1878		1036		704	1020	750	588	4790		0.492067	0.809476	0.292233		0.0106985	0.272473	0.0385857	0.306667	0.160224		0.550224	0.123929	0.429146	0.0530197	0.833579	0.112578	0.131076	0.0768429
N	32	32	32	17	32	32	31	30	32	14	32	32	29	32	26	31	31	30	31	32	32	30		32		32	32	32	32	32	N	32	32	32	17	32	32	31	30	32	14	32	32	29	32	26	31	31	30
Ave	2383.41	2828.78	2295.03	1568.88	1473.91	1546.72	1166.19	3529.87	3831.38	3469.5	2882.91	3223.31	2652.24	2435.34	4403	1657.13	2015.42	2472.3	1890.77	1975	3070.47	2325.77		1860.53		1520.47	3342.19	1865.09	758.656	7894.56	Ave	0.227687	0.2901	0.215302	0.113542	0.100233	0.110436	0.0571108	0.388347	0.4306	0.379888	0.297685	0.345388	0.26536	0.234965	0.510705	0.125909	0.176118	0.240144
[truncated: 12 more columns]

## Sheet: 190815
	war4µM	cic0.4µM	pz0.04µM	dih4µM	cal0.4µM	art4µM	cor100µM	war+cic	war+pz	war+dih	war+cal	war+art	war+cor	cic+pz	cic+dih	cic+cal	cic+art	cic+cor	pz+dih	pz+cal	pz+art	pz+cor	dih+cal	dih+art	dih+cor	cal+art	cal+cor sick	art+cor	neg	pos	Normalization	war4µM	cic0.4µM	pz0.04µM	dih4µM	cal0.4µM	art4µM	cor100µM	war+cic	war+pz	war+dih	war+cal	war+art	war+cor	cic+pz	cic+dih	cic+cal	cic+art	cic+cor
	2633	1757	792	951	942	1807	732	4329	5905	3449	1825	2726	830	2720	7197	1764	1702	4710	775	737	3286	2220		836		1148	2952	1559	537	7249		0.349403	0.188347	0.0109278	0.0401606	0.038506	0.19754	-0.000103418	0.66122	0.950974	0.499428	0.200849	0.366502	0.0179143	0.365399	1.18851	0.189634	0.178235	0.731268
	1201	1996	2552	790	1152	1292	530	2064	2007	2597	1197	4260	1243	3622	2259	1499	2351	2201	1506	3107	2964	2242		1303		1659	1512	2199	458	5483		0.0861242	0.232288	0.334511	0.0105601	0.0771153	0.102855	-0.037242	0.24479	0.234311	0.342785	0.0853888	0.648534	0.0938461	0.531235	0.280642	0.140913	0.297556	0.269978
	4208	978	2152	858	512	1369	423	2222	4404	1631	711	1857	2297	1170	5887	1832	1414	3017	3035	578	1743	1126		1214		2066	3324	1068	572	11150		0.638974	0.0451247	0.260969	0.0230622	-0.0405513	0.117012	-0.0569144	0.273839	0.675009	0.165181	-0.00396436	0.206733	0.287628	0.0804247	0.947665	0.202136	0.125285	0.420003
	3545	1030	1490	1697		1198	2352	903	3794	1422	2426	3927	1797	2926		719	2687	3152	2555	468	2029	2119		980		1131		1192	461	1619		0.517078	0.0546851	0.139258	0.177316		0.0855726	0.29774	0.0313356	0.562858	0.126756	0.311346	0.587311	0.195701	0.403273		-0.00249352	0.359331	0.444824
	1359	1751	2502	1226	1449	1878	407	3440	5881	869	3793	3679	1945	1802	5184	1653	2573	3487	2370	1166	2409	3179		1536		1018	2641	2509	741	6042		0.115173	0.187244	0.325318	0.0907205	0.13172	0.210593	-0.059856	0.497774	0.946562	0.0250846	0.562674	0.541715	0.222912	0.196621	0.818415	0.169226	0.338372	0.506415
	3539	611	1632	1621	230	1249	215	1094	2331	2794	1332	1625	656	1209		364	1612	5422	1091	624	1606	1506		1056		1902	2833	781	792	1582		0.515975	-0.0223498	0.165365	0.163343	-0.0923982	0.0949492	-0.095156	0.0664518	0.293879	0.379004	0.110209	0.164078	-0.0140763	0.087595		-0.0677617	0.161688	0.862173
	984	1145	2584	874	5042	1416	971	2672	2904	1936	3171	2406	3740	644	4957	1068	1330	3960	1348	1672	2007			805		973		1334	758	3367		0.0462278	0.0758283	0.340394	0.0260039	0.792308	0.125653	0.0438377	0.356574	0.399228	0.221257	0.448317	0.307668	0.55293	-0.0162826	0.77668	0.0616716	0.109841	0.593378
	1274	1686	1373	1617	1458	1277	980	2262	1694	1336	310	2076	1713	3296	1597	625	1271	1779	2232	539	1938	1110		1092		1546	3757	1072	540	2062		0.0995455	0.175293	0.117747	0.162608	0.133375	0.100097	0.0454924	0.281193	0.176764	0.110944	-0.0776899	0.246997	0.180258	0.471299	0.15893	-0.0197758	0.098994	0.192392
	2744	3356	846	963	1629	1702	1833	3477	3695	2592	916	2420	4031	1154	3497	1154	2322	1802	1199	1755	998	776		1171		2008		1050	617	5681		0.369811	0.48233	0.020856	0.0423669	0.164814	0.178235	0.20232	0.504576	0.544656	0.341865	0.0337257	0.310242	0.606431	0.077483	0.508253	0.077483	0.292225	0.196621
	2269	1223	2349	676	828	1248	1306	4474	4257	1768	1862	3852	1604	2083	2066	799	2527	4414	863	390	2067	6648		1444		1766		1007	323	9210		0.28248	0.090169	0.297189	-0.0103993	0.0175466	0.0947653	0.105429	0.687879	0.647982	0.190369	0.207652	0.573522	0.160217	0.248284	0.245158	0.0122148	0.329915	0.676848
	2929	2296	2152	955	753	1405	1292	5102	4344	4315	1059	3952	2470	2836	2790	585	1371	5478	1873	477	846	1971		1231		1129	1817	1100	326	7558		0.403824	0.287444	0.260969	0.0408961	0.00375752	0.12363	0.102855	0.803339	0.663978	0.658646	0.0600169	0.591907	0.319435	0.386726	0.378268	-0.02713	0.117379	0.872468
	991	3484	1969	2954	1243	1395	687	1115	3990	2653	2308	1625	2972	2333	5463	642	2805	6432	2854	1201	1178	4026		792		785		1307	378	10955		0.0475148	0.505863	0.227324	0.408421	0.0938461	0.121792	-0.00837686	0.0703127	0.598893	0.35308	0.289651	0.164078	0.41173	0.294247	0.869711	-0.0166503	0.381026	1.04787
	1279	1157	546	860	1886	1947	2187	3471	2986	3271	1972	2519	3366	522	4605	1423	2833	4403	941	674	7524	786		1156		1928		2299	469	6006		0.100465	0.0780346	-0.0343003	0.0234299	0.212064	0.223279	0.267404	0.503473	0.414304	0.466702	0.227876	0.328444	0.484168	-0.0387128	0.711964	0.12694	0.386174	0.674825
	1320	1898	1022	1755	289	1927	650	2883	3120	2560	1940	1275	4379	396	1630	281	1869	3767	2234	780	1820	1484		1343		1637		2109	795	4862		0.108003	0.214271	0.0532143	0.187979	-0.0815508	0.219602	-0.0151795	0.395367	0.43894	0.335982	0.221992	0.0997294	0.670413	-0.0618784	0.164998	-0.0830216	0.208939	0.557894
	859	714	1211	800	880	1365	472	1633	3519	1775	2116	5767	1765	1228	7364	1775	1842	2730	1340	1656	1901	438		641		1729	3542	1001	397	9514		0.0232461	-0.00341279	0.0879627	0.0123987	0.027107	0.116276	-0.0479055	0.165549	0.512298	0.191656	0.254351	0.925602	0.189818	0.0910882	1.21922	0.191656	0.203975	0.367237
	2693	315	1399	1635	715	1043	1263	1347	4797	2938	1186	862	2039	1403	5942	841	1888	2331	1721	1129	1454	1123		627		1387	2244	2194	391	9374		0.360435	-0.0767706	0.122527	0.165917	-0.00322894	0.0570752	0.0975231	0.112967	0.747264	0.405479	0.0833664	0.0237976	0.240194	0.123263	0.957777	0.0199367	0.212432	0.293879
	2088	4663	1168	1199	1566	1866	2612	5259	4597		1369	4561	1918	3121	2658	2745	2177	5035	1371	1519	1891	1327		1251		1225	2313	1498	396	9637		0.249203	0.722627	0.080057	0.0857565	0.153231	0.208387	0.345542	0.832204	0.710493		0.117012	0.703874	0.217948	0.439124	0.354	0.369995	0.265566	0.791021
	1140	1856	2249	1413	671	1315	1283	8910	5172	2396	1996	4766	2612	1141	3647	2084	4429	951	2229	1484	2000	870		1593		1467	4467	2920	1258	6670		0.0749091	0.206549	0.278803	0.125101	-0.0113185	0.107084	0.1012	1.50346	0.816209	0.30583	0.232288	0.741564	0.345542	0.0750929	0.535831	0.248467	0.679605	0.0401606
	1518	1260	2045	2989	1388	1807	1737	15742	3656	1752	1939	2169	1623	4720	3259	2483	3251	4181	785	1092	2399			1004		1515	1617	3822	939	4839		0.144406	0.0969716	0.241297	0.414855	0.120505	0.19754	0.18467	2.75955	0.537486	0.187428	0.221809	0.264095	0.163711	0.733107	0.464496	0.321825	0.463025	0.63401
	2674	3337	1646	1666	3222	1624	813	1064	1990	6145	1834	4564	2006	2880	5621	1223	3178	6222	5843	1863	2406	1385		1266		532		2228	1976	4519		0.356941	0.478837	0.167939	0.171616	0.457693	0.163894	0.0147888	0.0609362	0.231185	0.995099	0.202504	0.704426	0.234127	0.394815	0.89876	0.090169	0.449604	1.00926
	1017	1374	2683		958	1374	2663	5260	3483	1886	2247	3047	3093	1223	5342	732	3298	5680	769	1187	1022	3671		1014		2785	4749	1098	611	4252		0.052295	0.117931	0.358596		0.0414476	0.117931	0.354919	0.832388	0.505679	0.212064	0.278436	0.425519	0.433976	0.090169	0.847464	-0.000103418	0.471666	0.909607
	1162	698	752	2404	1857	2221	1055	3072	2706	5524	1112	1622	4209	1023	4443	251	4523	2813	2335	3809	1780	1477		1556		2446	4378	1328	1142	6844		0.0789539	-0.00635446	0.00357367	0.307301	0.206733	0.273655	0.0592815	0.430115	0.362825	0.880926	0.0697612	0.163527	0.639157	0.0533981	0.682179	-0.0885373	0.696888	0.382497
	2400	817	3480	862	1449	1233	514	3944	4006	3746	1559	1401	1215	3142	4096	637	4453	6715	2165	3585	3127	2937		1498		2407	1508	2716	442	7286		0.306565	0.0155242	0.505128	0.0237976	0.13172	0.0920075	-0.0401836	0.590436	0.601835	0.554033	0.151944	0.122895	0.0886981	0.442985	0.618382	-0.0175696	0.684018	1.0999
	2664	405	658	671	567	809	1099	9336	4997	1405	2521	4672	3261	396	7758	2516	1724	3405	1364	1096	1487	1589		932		825	2623	1921	572	9617		0.355103	-0.0602237	-0.0137086	-0.0113185	-0.0304394	0.0140534	0.0673711	1.58178	0.784035	0.12363	0.328812	0.724282	0.464864	-0.0618784	1.29166	0.327892	0.18228	0.491339
	720	2503	1369	1597	1992	1255	1824	6582	2419	2592	2202	2066	2120	1213	5365	975	2505	1466	2583	822	1821	4614		663		738		1532	924	10633		-0.00230967	0.325502	0.117012	0.15893	0.231553	0.0960523	0.200665	1.07544	0.310059	0.341865	0.270162	0.245158	0.255086	0.0883304	0.851693	0.0445731	0.32587	0.134846
	658	1347	1132	4666	1111	1126	1434	6900	3777	3951	2293	3768	2792	863	7859	1646	2119	4851	1448	1759	2526	3141		933		1533		1617	1013	4648		-0.0137086	0.112967	0.0734382	0.723179	0.0695773	0.0723351	0.128962	1.13391	0.559732	0.591723	0.286893	0.558078	0.378636	0.0239815	1.31023	0.167939	0.254902	0.757192
	1191	1335	820	1628	805	1131	1039	3848	4955	3593	2912	1553	5245	4075	3172	1430	3701	2499	3316	2829	1401	2436		1210		1204	3024	2647	1564	3440		0.0842856	0.110761	0.0160757	0.16463	0.0133179	0.0732544	0.0563398	0.572786	0.776313	0.525903	0.400699	0.150841	0.82963	0.614521	0.448501	0.128227	0.54576	0.324767
	986	1526	897	3704	1235	1287	1195	2435	2489	2270	3414	2211	5496	2207	2356	742	4322	929	1347	597	2150	3620		1214		898		2297	419	8044		0.0465955	0.145877	0.0302325	0.546311	0.0923752	0.101936	0.0850211	0.313	0.322928	0.282664	0.492993	0.271817	0.875778	0.271081	0.298476	0.00173512	0.659933	0.0361159
	2086	1576	1361	1656	1261	803	1012	6607	2668		2034	4069	1858	1342	1769	1461	2591	1887		3805	1092	3701		742		1021	980	1120	1357	4293		0.248835	0.155069	0.115541	0.169778	0.0971554	0.0129502	0.0513757	1.08004	0.355838		0.239275	0.613418	0.206916	0.112048	0.190553	0.133926	0.341681	0.212248
	4920	2210	1243	2014	2400	1460	812	5801	4073	4549	2951	3828	1673	2716	1571	994	1174	1732	975	1902	1611	2355		1144		2210	1910	2663	522	4788		0.769878	0.271633	0.0938461	0.235598	0.306565	0.133742	0.0146049	0.931853	0.614153	0.701668	0.407869	0.569109	0.172903	0.364663	0.15415	0.0480664	0.0811601	0.183751
	658	844	663	3259	534	1401	2266	4875	1292	2624	1457	2627	1242	1980	5360	1952	2444	3738		713	2585	3148		991		1249		845	757	4246		-0.0137086	0.0204882	-0.0127894	0.464496	-0.0365065	0.122895	0.281929	0.761604	0.102855	0.347749	0.133191	0.3483	0.0936622	0.229347	0.850774	0.224199	0.314655	0.552562
	1286	904	746	1949	293	791	2986	3128		2668	521	2239	1907	2879	1156	922	1703	2024	2798	1655	895	777		916		1860	1070	1030	995	2023		0.101752	0.0315195	0.00247054	0.223647	-0.0808154	0.010744	0.414304	0.440411		0.355838	-0.0388966	0.276965	0.215925	0.394631	0.0778507	0.0348289	0.178419	0.237436
N	32	32	32	31	31	32	32	32	31	30	32	32	32	32	30	32	32	32	30	32	32	30		32		32	20	32	32	32	N	32	32	32	31	31	32	32	32	31	30	32	32	32	32	30	32	32	32
Ave	1906.09	1626.62	1546.34	1674.48	1300.55	1406.91	1270.12	4226.59	3609.94	2766.9	1890.16	2937.22	2472.41	2008.28	4195.67	1244.28	2499.66	3537.91	1908.83	1458.44	2061.34	2260.07		1098.56		1491.47	2663.05	1720.72	732.562	6171.66	Ave	0.215759	0.164377	0.149617	0.173176	0.104427	0.123981	0.0988331	0.642392	0.529017	0.374021	0.212828	0.405335	0.319878	0.234546	0.636706	0.0940816	0.324888	0.515774
[truncated: 12 more columns]
