# Supplementary material for: Large-scale phenotypic drug screen identifies neuroprotectants in zebrafish and mouse models of retinitis pigmentosa
Source: eLife. 2021 Jun 29;10:e57245. doi: 10.7554/eLife.57245 (PMC8425951; doi:10.7554/eLife.57245)
Supplement: Supplementary file 1. — (a) Statistical summary of Mtz titration assay in rho:YFP-NTR zebrafish larvae - Figure 1B. Survival effects (normalized YFP, %), 95% confidence intervals, p-values, and sample sizes (N) for each condition at 7 dpf. Student’s t-test was used to calculate p-values for each condition relative non-ablated controls (0 mM Mtz). Bonferroni correction for multiple comparisons resulted in an adjusted alpha level of 0.01 (α=0.01). Two experimental repeats were performed for each condition and data pooled across replicates (Figure 1—source data 1). (b) Paired compound p-values relative to all control conditions in Figure 7—figure supplement 1. Student’s t-test was used to calculate p-values for each paired condition relative to ablated controls (+Mtz), BMN alone control and NEC alone control for all paired conditions. Bonferroni correction for multiple comparisons resulted in an adjusted significance level of 0.003 (α=0.003). Survival effects as shown in Figure 7—figure supplement 1 are provided for context (Figure 7—figure supplement 1—source data 1). Inhibitor abbreviations: BMN, talazoparib; NEC, necrostatin-1. Other abbreviations: CI, confidence interval; Mtz, Metronidazole; NA, not applicable. (c) Paired compound p-values relative to all control conditions in Figure 10. Student’s t-test was used to calculate p-values for each paired condition relative to ablated controls (+Mtz) and relevant individual compound controls (Cmpd A, top paired compound; Cmpd B, bottom paired compound). Bonferroni correction for multiple comparisons to +Mtz control resulted in an adjusted significance level of 0.002 (α=0.002); significance level for comparisons to individual compound controls was 0.05 (α=0.05). Survival effects as shown in Figure 10 are provided for context (Figure 10—source data 1). Lead compound abbreviations: WAR, Warfarin; CLO, Cloxyquin; CPO, Ciclopirox olamine; MIC, Miconazole; ZPT, Zinc pyrithione; DHA, Dihydroartemisinin; CHL, Chloroxine; CAL, Calcimycin; SUL, Sulindac [file elife-57245-supp1.xlsx]

## Sheet: Supplementary File 1a
Statistical summary of Mtz titration assay in rho:YFP-NTR zebrafish larvae - Figure 1B
Mtz [mM]:	0	0.625	1.25	2.5	5	10
Effect (%)	0	-0.546475	-0.789945	-0.865689	-0.869562	-0.825842
95% CI lower	-0.209258	-0.717622	-0.947281	-1.01858	-1.02061	-0.978078
95% CI upper	0.209258	-0.375327	-0.63261	-0.712802	-0.718515	-0.673606
p-value	1	9.5e-09	5.5e-15	1.5e-16	1.5e-16	1e-15
N	56	55	56	56	56	55
adjusted significance level, α=0.01
Survival effects (normalized YFP, %), 95% confidence intervals, p-values, and sample sizes (N) for each condition at 7 dpf.
Student’s t-test was used to calculate p-values for each condition relative non-ablated controls (0 mM Mtz).
Bonferroni correction for multiple comparisons resulted in an adjusted alpha level of 0.01 (α=0.01).
Two experimental repeats were performed for each condition and data pooled across replicates (Figure 1 - Source Data).

## Sheet: Supplementary File 1b
Paired compound p-values relative to all control conditions in Figure 7-supplement figure 1
Inhibitor [μM]	(+Mtz)	BMN 0.5	BMN 0.25	BMN 0.125	NEC 64	NEC 32	NEC 16	BMN 0.5 NEC 64	BMN 0.5 NEC 32	BMN 0.5 NEC 16	BMN 0.25 NEC 64	BMN 0.25 NEC 32	BMN 0.25 NEC 16	BMN 0.125 NEC 64	BMN 0.125 NEC 32	BMN 0.125 NEC 16	(-Mtz)
Effect (%)	0	0.09	0.07	0.11	0.1	0.12	0.06	0.19	0.2	0.19	0.22	0.19	0.15	0.21	0.14	0.15	1
p-value (+Mtz)	1	6.6e-06	1.8e-05	0.0003	5.9e-07	1.4e-06	0.00036	9.4e-12	1e-12	6.6e-15	7.7e-13	3.3e-13	2.7e-10	1.8e-16	1.6e-08	2.2e-05	2.6e-31
p-value (BMN)	NA	NA	NA	NA	NA	NA	NA	0.00048	0.00019	0.00012	6.6e-07	5.2e-06	0.0027	0.0048	0.47	0.37	NA
p-value (NEC)	NA	NA	NA	NA	NA	NA	NA	0.00074	0.019	2.8e-07	3e-05	0.025	0.00062	1.1e-05	0.67	0.015	NA
adjusted significance levels, α=0.003 for +Mtz comparisons; α=0.025 for pairs relative to each indiciated individual compound
Student’s t-test was used to calculate p-values for each paired condition relative to ablated controls (+Mtz), BMN alone control and NEC alone control for all paired conditions.
Bonferroni correction for multiple comparisons resulted in an adjusted significance level of 0.003 (α=0.003).
Survival effects as shown in Figure 7—figure supplement 1 are provided for context (Figure 7—figure supplement 1-source data).
Inhibitor abbreviations: BMN, talazoparib; NEC, necrostatin-1.
Other abbreviations: CI, confidence interval; Mtz, Metronidazole; NA, not applicable.

## Sheet: Supplementary File 1c
Paired compound p-values relative to all control conditions in Figure 10
Drug [μM]	(+Mtz)	WAR	CPO	ZPT	DHA	CAL	ART	COR	WAR	WAR	WAR	WAR	WAR	WAR	CPO	CPO	CPO	CPO	CPO	ZPT	ZPT	ZPT	ZPT	DHA	CAL	CAL	ART	(-Mtz)
	2500	4	2	0.04	4	0.4	100	4	CPO	ZPT	DHA	CAL	ART	COR	ZPT	DHA	CAL	ART	COR	DHA	CAL	ART	COR	ART	ART	COR	COR	0
Effect (%)	0	0.28	0.25	0.21	0.17	0.1	0.11	0.06	0.58	0.46	0.48	0.36	0.4	0.36	0.24	56%*	0.17	0.28	41%*	0.24	0.16	0.27	0.22	0.11	0.17	40%*	0.15	1
p-value (+Mtz)	1	1.95944e-26	2.02854e-25	2.49272e-27	5.67642e-14	1.18507e-07	4.79976e-19	2.04258e-05	1.21164e-24	2.0712e-31	2.31559e-23	5.47011e-27	1.01721e-42	1.14801e-24	6.66055e-21	9.42335e-40	2.51324e-15	9.94549e-32	4.54391e-28	3.45241e-22	8.12513e-18	1.48271e-31	4.69338e-16	1.39993e-19	3.38309e-16	1.21239e-17	7.58834e-24	1.76732e-49
p-value (Top Cmpnd)	NA	NA	NA	NA	NA	NA	NA	0.00048	9.34534e-09	3.89373e-07	2.56358e-06	0.0145094	5.88773e-05	0.0264744	0.767721	5.53004e-17	0.00148645	0.284861	6.1825e-06	0.261461	0.00993071	0.0115691	0.693182	0.00246962	0.00243068	2.34255e-11	0.00049142	NA
p-value (Bottom Cmpnd)	NA	NA	NA	NA	NA	NA	NA	0.00074	2.29583e-10	2.66086e-13	2.00181e-12	2.14066e-15	3.7921e-29	7.93853e-19	0.254994	6.06627e-24	0.00496091	3.11174e-16	1.55345e-22	0.00895817	0.00634086	7.92718e-16	6.29089e-10	0.889421	0.000579276	4.64475e-14	5.6818e-09	NA
adjusted significance levels, α=0.002 for +Mtz comparisons; α=0.025 for pairs relative to each indiciated individual compound
Student’s t-test was used to calculate p-values for each paired condition relative to ablated controls (+Mtz) and relevant individual compound controls (Cmpd A, top paired compound; Cmpd B, bottom paired compound).
Bonferroni correction for multiple comparisons to +Mtz control resulted in an adjusted significance level of 0.002 (α=0.002); significance level for comparisons to individual compound controls was 0.05 (α=0.05).
Survival effects as shown in Figure 10 are provided for context (Figure 10-source data).
Lead compound abbreviations: WAR, Warfarin; CLO, Cloxyquin; CPO, Ciclopirox olamine; MIC, Miconazole; ZPT, Zinc pyrithione; DHA, Dihydroartemisinin; CHL, Chloroxine; CAL, Calcimycin; SUL, Sulindac; ART, Artemesinin; COR, Cortexolone; POS, positive control.
Other abbreviations: CI, confidence interval; Mtz, Metronidazole.
